# Supplementary material
Source: PubMed Central journal article supplement (PMC10586521)
Supplement: NIHMS1934976-supplement-SI.pdf [file NIHMS1934976-supplement-SI.pdf]

# Supplemental Experimental Procedures

## Stereochemical Control of Splice Modulation in FD-895 Analogues

Warren C. Chan,<sup>†,‡</sup> Kelsey A. Trieger,<sup>†,‡</sup> James J. La Clair,<sup>‡</sup> Catriona H. M. Jamieson,<sup>§</sup> and Michael D. Burkart<sup>‡,\*</sup>

<sup>‡</sup>Department of Chemistry and Biochemistry, University of California, San Diego, 9500 Gilman Drive, La Jolla, California 92093-0358, United States and <sup>§</sup>the Division of Regenerative Medicine, Moores Cancer Center, and Sanford Consortium for Regenerative Medicine; University of California, San Diego, La Jolla, CA 92093

<sup>†</sup> These authors contributed equally.

\* Corresponding Author: Michael D. Burkart ([mburkart@ucsd.edu](mailto:mburkart@ucsd.edu)).

### TABLE OF CONTENTS

|                            |          |
|----------------------------|----------|
| Figure S1 and Table S1     | S2-S3    |
| Figure S2 and Table S2     | S4-S5    |
| Figure S3 and Table S3     | S6-S7    |
| Figure S4 and Table S4     | S8-S9    |
| Figure S5 and Table S5     | S10-S11  |
| Figure S6 and Table S6     | S12-S13  |
| Figure S7 and Table S7     | S14-S15  |
| Figure S8 and Table S8     | S16-S17  |
| Figure S9 and Table S9     | S18-S19  |
| Figure S10 and Table S10   | S20-S21  |
| Figure S11 and Table S11   | S22-S23  |
| Table S12                  | S24      |
| Table S13                  | S25      |
| Figure S12                 | S26      |
| Copies of NMR spectra      | S27-S82  |
| Copies of HPLC purity data | S83-S102 |

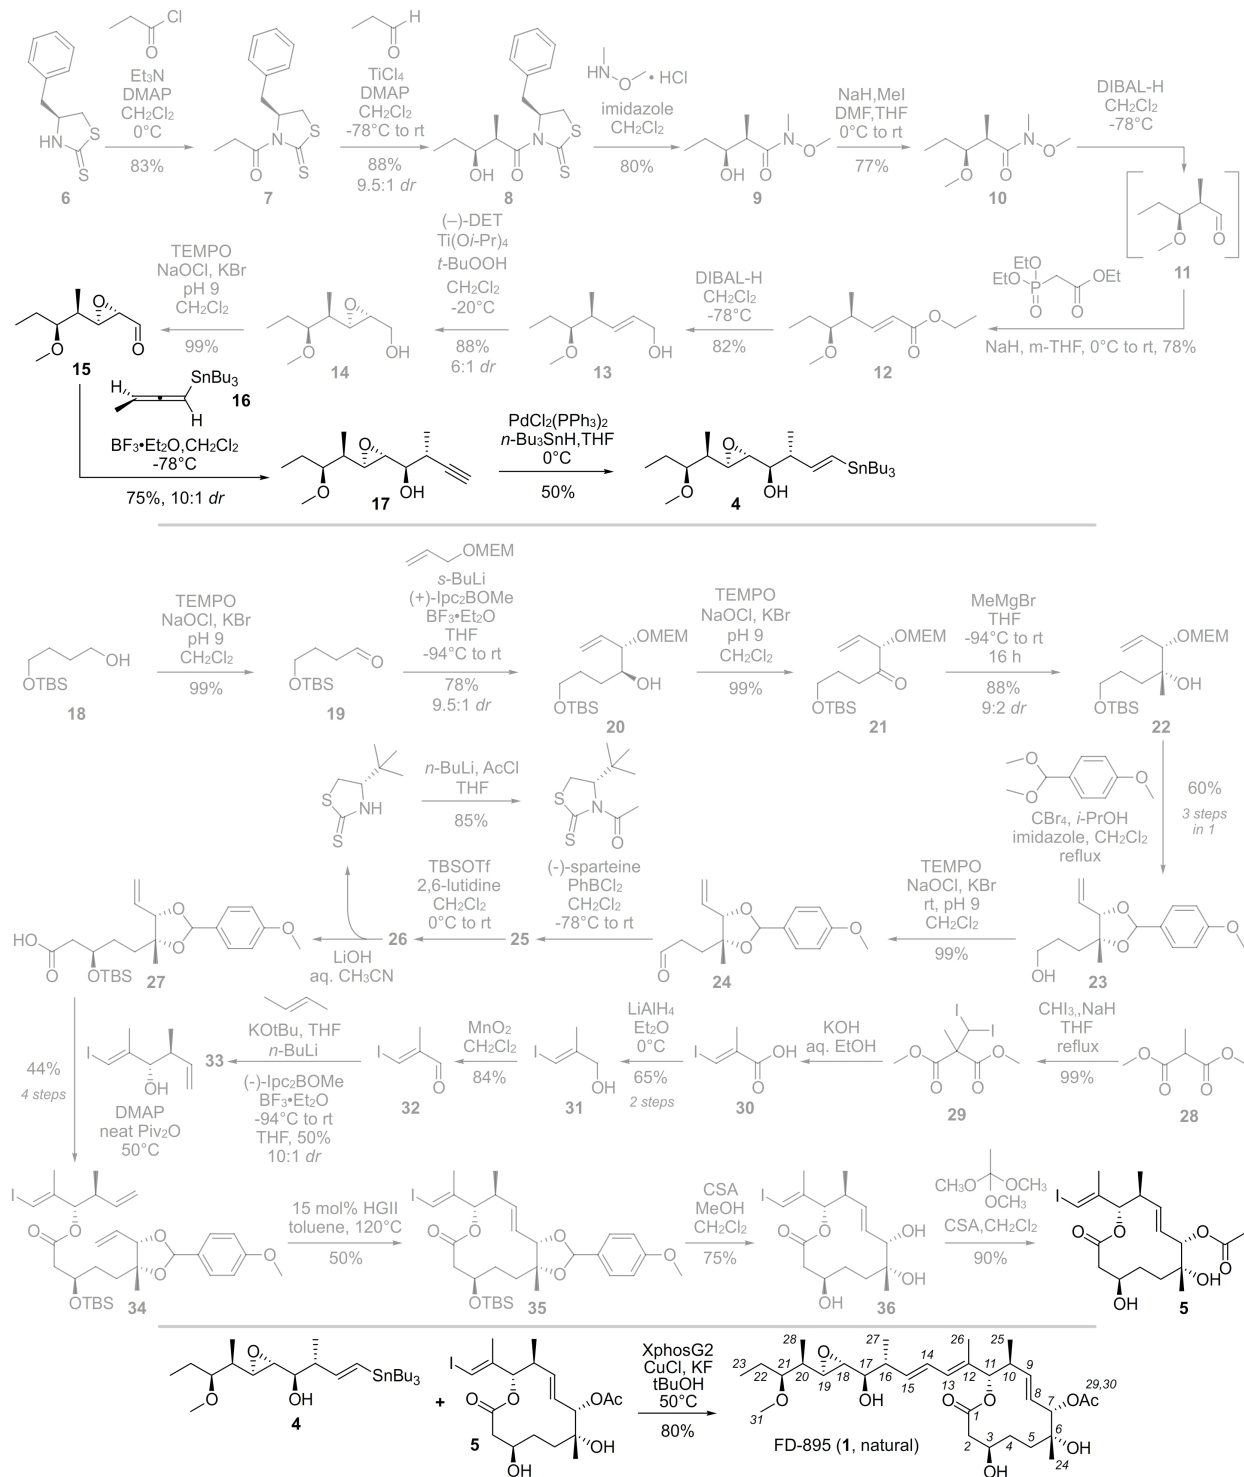

**Figure S1.** Synthesis of FD-895 (**1**) from aldehyde **15** and core **5**. The entire synthetic pathway is shown using the methods and materials prepared in Chan *et al.* 2020.<sup>25</sup> In this publication, a central route was developed to enable preparation of **14** and **36**, these steps are shown in grey. Steps used specifically to prepare **1** from **14** and **36** are shown in black. Experimental procedures are provided for these (black) steps.



**Table S1.** NMR data for FD-895 (1) in C<sub>6</sub>D<sub>6</sub>

| Position <sup>a</sup> | $\delta_{\text{H}}$ , mult ( <i>J</i> in Hz) | $\delta_{\text{C}}$ | <sup>1</sup> H, <sup>1</sup> H-COSY | <sup>1</sup> H, <sup>1</sup> H-NOESY | <sup>1</sup> H, <sup>13</sup> C-HMBC |
|-----------------------|----------------------------------------------|---------------------|-------------------------------------|--------------------------------------|--------------------------------------|
| 1                     |                                              | 172.1               |                                     |                                      |                                      |
| 2'                    | 2.30, dd (14.8, 3.9)                         | 38.6                | 2''w, 3                             | 2'', 3                               | 1, 3, 4                              |
| 2''                   | 2.20, dd (14.8, 3.0)                         |                     | 2', 3                               | 2', 3, 4', 5'                        | 1, 3w                                |
| 3                     | 3.51, m                                      | 69.4                | 3OHw                                | 2', 2'', 4', 5', 5'', 6OH, 17OH      |                                      |
| 3OH                   | 3.66, d (11.0)                               |                     | 3                                   | 3, 6OH, 17OH                         |                                      |
| 4'                    | 1.60, m                                      | 30.4                | 3w, 4'', 5'                         | 2', 3, 8, 24                         | 3, 5                                 |
| 4''                   | 1.25, m                                      |                     | 3, 5'                               | 3w, 5', 7                            | 3, 5                                 |
| 5'                    | 1.54, m                                      | 35.9                | 5''                                 | 2'', 3, 5', 8                        | 4, 6, 24w                            |
| 5''                   | 1.23, m                                      |                     | 4'                                  | 3, 4', 7                             | 4, 6, 7, 24w                         |
| 6                     |                                              | 73.3                |                                     |                                      |                                      |
| 6OH                   | 1.85, s                                      |                     |                                     | 3, 3OH, 17OH                         |                                      |
| 7                     | 5.26, s                                      | 79.2                | 8                                   | 4'', 5'', 8, 24                      | 8, 9, 24, 26, 29                     |
| 8                     | 5.83, dd (15.2, 9.8)                         | 126.5               | 7, 9                                | 4'w, 5', 7, 9, 10                    | 6w, 9, 10                            |
| 9                     | 5.63, dd (15.2, 10.0)                        | 140.7               | 8, 10                               | 4'', 5'', 7, 8, 10, 11, 25           | 7, 8, 10, 11w, 25w                   |
| 10                    | 2.38, m                                      | 41.1                | 11, 25                              | 7, 8, 9, 11w, 25, 26                 | 8, 9, 11, 25                         |
| 11                    | 5.24, d (1.8)                                | 82.6                | 10                                  | 9, 10w, 13, 25, 26w                  | 1, 9, 10, 12, 14, 25, 26             |
| 12                    |                                              | 131.6               |                                     |                                      |                                      |
| 13                    | 6.10, dd (10.9, 1.5)                         | 131.7               | 14, 26                              | 11, 14, 15, 25, 26w, 28w             | 11, 14, 15, 26                       |
| 14                    | 6.23, dd (15.0, 10.8)                        | 126.2               | 13, 15                              | 13, 15, 16, 26, 27                   | 12, 13, 16                           |
| 15                    | 5.53, dd (15.0, 8.7)                         | 138.3               | 14, 16                              | 13, 14, 16, 17, 18, 27               | 13, 14, 16, 17, 27                   |
| 16                    | 2.39, m                                      | 42.6                | 17, 27                              | 14, 15, 17, 18, 27                   | 13w, 14, 15, 17, 18, 27              |
| 17                    | 3.10, m                                      | 75.3                | 16, 18                              | 15, 16, 18, 19, 27                   | 16w, 27w                             |
| 17OH                  | 2.14, bs                                     |                     | 17                                  | 3w, 3OH, 6OH, 17w                    |                                      |
| 18                    | 2.66, dd (5.8, 2.2)                          | 60.6                | 17, 19                              | 15w, 16, 17, 20, 27, 28              | 17, 20                               |
| 19                    | 2.87, dd (8.3, 2.3)                          | 59.7                | 18w, 20                             | 17, 20, 21, 28, 31                   | 17, 20, 21, 28                       |
| 20                    | 1.26, m                                      | 39.4                | 19, 28                              | 18, 19, 21, 23, 28                   | 18, 19, 21, 23, 27, 28               |
| 21                    | 3.15, td (6.4, 4.1)                          | 83.6                | 20, 22', 22''                       | 19, 20, 22', 22'', 23, 28            | 19, 20, 22w, 23, 28, 31              |
| 22'                   | 1.63, m                                      | 23.9                | 22'', 23                            | 21, 22'', 23                         | 20, 21, 23                           |
| 22''                  | 1.37, ddd (14.0, 7.6, 6.7)                   |                     | 22', 23                             | 21, 22', 23                          | 20, 21, 23                           |
| 23                    | 0.84, t (7.5)                                | 10.0                | 22', 22''                           | 21, 22', 22''                        | 21, 22                               |
| 24                    | 1.02, s                                      | 24.8                |                                     | 4', 5', 6OH, 7                       | 5, 6, 7                              |
| 25                    | 0.70, d (6.8)                                | 16.4                | 10                                  | 9, 10, 11, 13w, 26                   | 9, 10, 11                            |
| 26                    | 1.57, d (1.3)                                | 11.9                |                                     | 10, 11, 14, 25                       | 11, 12, 13, 14, 15                   |
| 27                    | 1.14, d (6.8)                                | 17.0                | 16                                  | 14, 15, 16, 17, 18w                  | 15, 16, 17                           |
| 28                    | 0.83, d (7.1)                                | 10.6                | 20                                  | 17, 18, 19, 21, 31w                  | 19, 20, 21                           |
| 29                    |                                              | 169.0               |                                     |                                      |                                      |
| 30                    | 1.62, s                                      | 20.7                |                                     |                                      | 29                                   |
| 31                    | 3.25, s                                      | 57.8                |                                     | 19, 23                               | 21                                   |

<sup>a</sup> Position numbering is provided in Supporting Figure S1.

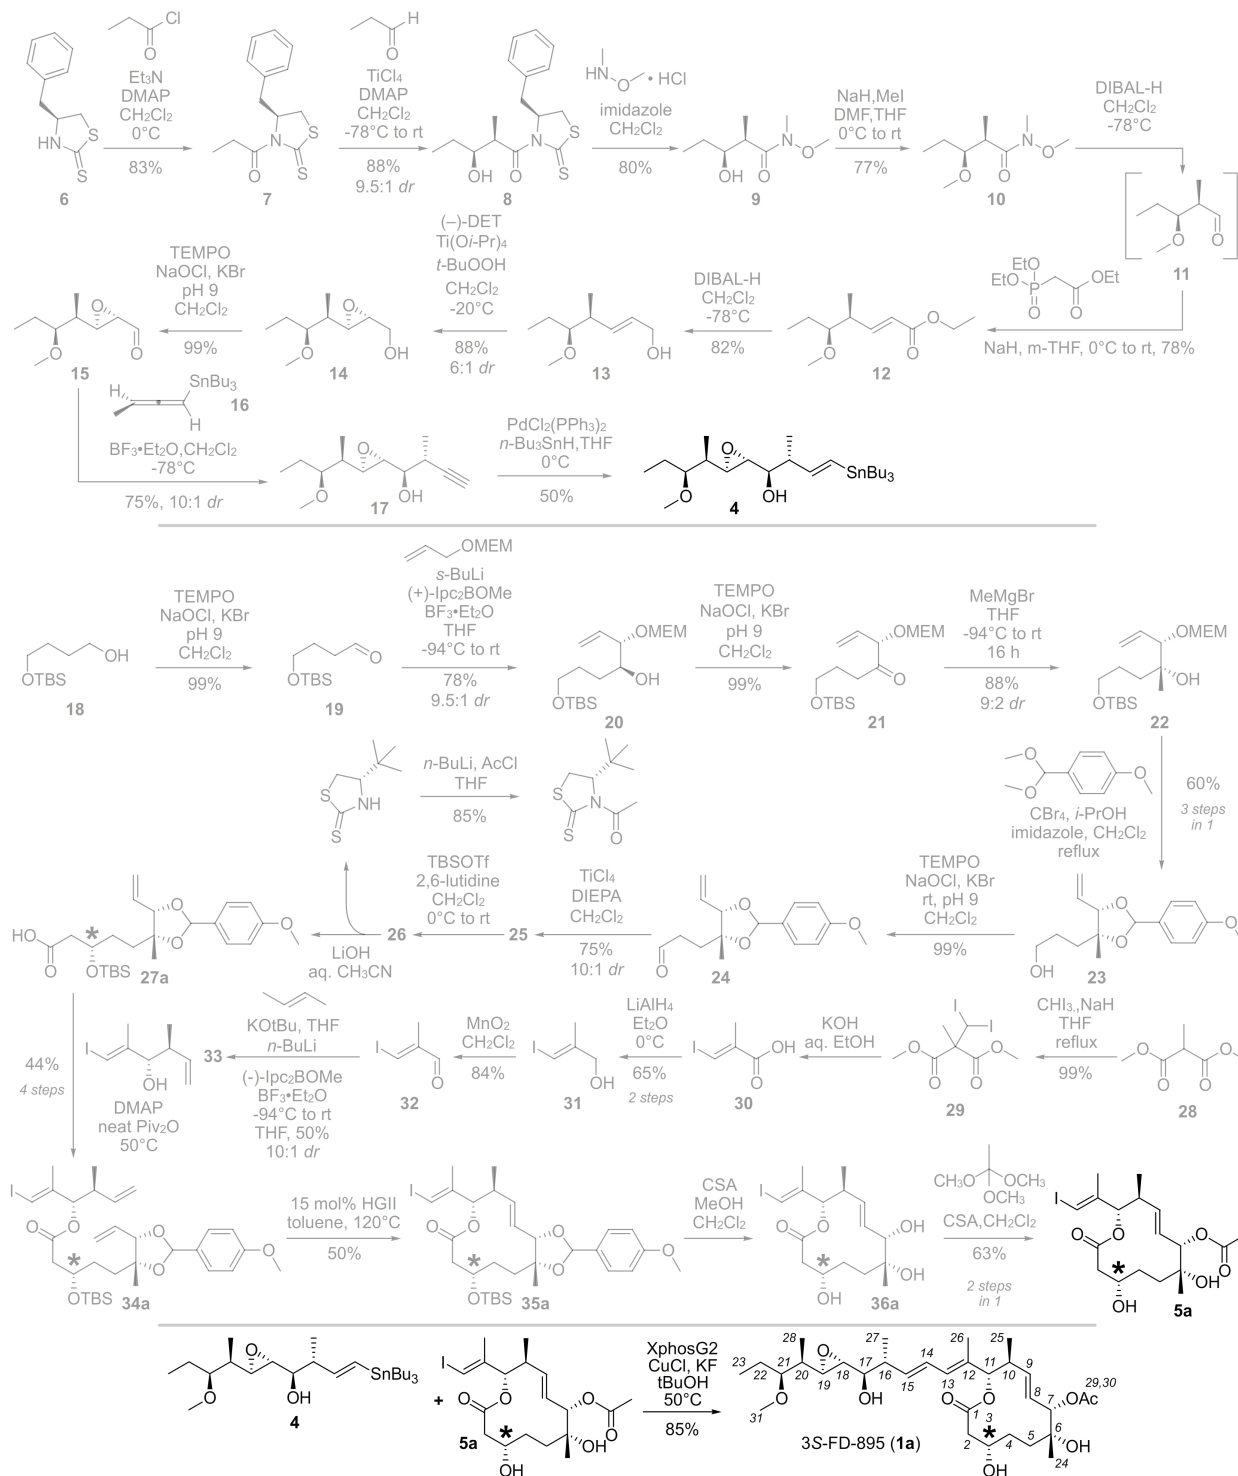

**Figure S2.** Synthesis of 3S-FD-895 (**1a**) from side chain **4** and core **5a**. The entire synthetic pathway is shown using the methods and materials (**4** and **5a**) prepared in Chan *et al.* 2020.<sup>25</sup> In this publication, a central route was developed to enable preparation of analogues of FD-895 (**1**), these steps are shown in grey. Steps used specifically to prepare **1a** are shown in black. Experimental procedures are provided for these (black) steps.

**Table S2. NMR data for 3S-FD-895 (1a) in C<sub>6</sub>D<sub>6</sub>**

| Position | $\delta_{\text{H}}$ , mult ( <i>J</i> in Hz) | $\delta_{\text{C}}$ | <sup>1</sup> H, <sup>1</sup> H-COSY | <sup>1</sup> H, <sup>1</sup> H-NOESY | <sup>1</sup> H, <sup>13</sup> C-HMBC |
|----------|----------------------------------------------|---------------------|-------------------------------------|--------------------------------------|--------------------------------------|
| 1        |                                              | 169.6               |                                     |                                      |                                      |
| 2'       | 2.47, m                                      | 40.0                | 2'', 3                              | 3, 5'                                | 1, 3, 4w                             |
| 2''      | 2.38, m                                      |                     | 2', 3                               | 3                                    | 1, 3, 4                              |
| 3        | 4.25, bs                                     | 67.3                | 2', 2''w                            | 2'w, 2'', 4', 4''                    |                                      |
| 3OH      |                                              |                     |                                     |                                      |                                      |
| 4'       | 1.35, m                                      | 27.5                | 3w, 4'', 5''                        | 3, 5', 5'', 7                        | 2w, 3w, 5w                           |
| 4''      | 1.33, m                                      |                     | 3w, 4', 5'                          | 3, 5', 5''                           | 3w, 5w                               |
| 5'       | 1.88, dt (13.5, 6.5)                         | 30.7                | 4'', 5''                            | 4''                                  | 4, 6, 24                             |
| 5''      | 1.82, m                                      |                     | 4', 5'                              | 4', 24                               | 4, 6, 7, 24                          |
| 6        |                                              | 73.4                |                                     |                                      |                                      |
| 6OH      |                                              |                     |                                     |                                      |                                      |
| 7        | 5.26, d (9.8)                                | 79.3                | 8                                   | 4', 8, 9, 24                         | 8, 9, 24w, 29                        |
| 8        | 5.93, dd (15.2, 9.8)                         | 126.6               | 7, 9, 10w                           | 5'w, 7, 9, 10                        | 6w, 10                               |
| 9        | 5.62, dd (15.3, 10.0)                        | 140.4               | 8, 10                               | 7, 8, 10, 11, 25                     | 7, 10, 11w, 25w                      |
| 10       | 2.47, m                                      | 41.2                | 9w, 11, 25                          | 8w, 25                               | 8, 9, 11, 25w                        |
| 11       | 5.20, d (10.7)                               | 82.2                | 10                                  | 10w, 13, 25                          | 1, 9, 10, 12, 13, 25w, 26            |
| 12       |                                              | 132.1               |                                     |                                      |                                      |
| 13       | 6.17, d (11.0)                               | 131.4               | 14, 26w                             | 8, 15, 27w                           | 11, 15, 26                           |
| 14       | 6.26, dd (15.0, 10.9)                        | 126.3               | 13, 15                              | 15, 27                               | 12, 13, 16                           |
| 15       | 5.54, dd (15.0, 8.7)                         | 137.9               | 14, 16                              | 7, 13, 14, 16w, 27                   | 12, 13, 16, 17, 27                   |
| 16       | 2.38, m                                      | 42.6                | 15, 17w, 27                         | 14, 15, 27                           | 14, 15, 17, 18, 27                   |
| 17       | 3.10, t (6.6)                                | 75.2                | 16, 18                              | 16w, 18w 27                          | 15, 16, 18, 27                       |
| 17OH     |                                              |                     |                                     |                                      |                                      |
| 18       | 2.68, dd (5.8, 1.9)                          | 60.6                | 17, 19w                             | 17, 19, 20, 28                       | 17, 19w, 20w                         |
| 19       | 2.86, dd (8.2, 2.3)                          | 59.6                | 18w, 20                             | 20w, 28                              | 17w, 18w, 20, 21w                    |
| 20       | 1.27, ddd (8.2, 6.9, 4.1)                    | 39.3                | 19, 28                              | 18, 21, 22', 22'', 28                | 19, 28w                              |
| 21       | 3.14, td (6.3, 4.1)                          | 83.5                | 20, 22', 22''                       | 20, 22', 22'', 23, 28                | 19, 20w, 22w, 23, 28, 31             |
| 22'      | 1.63, m                                      | 23.8                | 21, 22'', 23                        | 22'', 23w                            | 20, 21, 23                           |
| 22''     | 1.39, m                                      |                     | 21, 22', 23                         | 22', 23                              | 20, 21, 23                           |
| 23       | 0.84, t (7.5)                                | 10.0                | 22', 22''                           | 21, 22', 22''                        | 21, 22                               |
| 24       | 1.11, s                                      | 24.8                |                                     | 2''                                  | 5, 6, 7                              |
| 25       | 0.73, d (6.8)                                | 16.5                | 10                                  | 10                                   | 9, 10, 11                            |
| 26       | 1.60, s                                      | 11.9                | 13                                  | 10, 14                               | 11, 12, 13                           |
| 27       | 1.15, d (6.7)                                | 17.1                | 16                                  | 15, 16, 17                           | 15, 16, 17                           |
| 28       | 0.85, d (7.8)                                | 10.6                | 20                                  | 20, 21                               | 19, 20                               |
| 29       |                                              | 169.1               |                                     |                                      |                                      |
| 30       | 1.66, s                                      | 20.8                |                                     |                                      | 29                                   |
| 31       | 3.25, s                                      | 57.7                |                                     | 21, 22', 23, 24                      | 21                                   |

<sup>a</sup> Position numbering is provided in Supporting Figure S2.

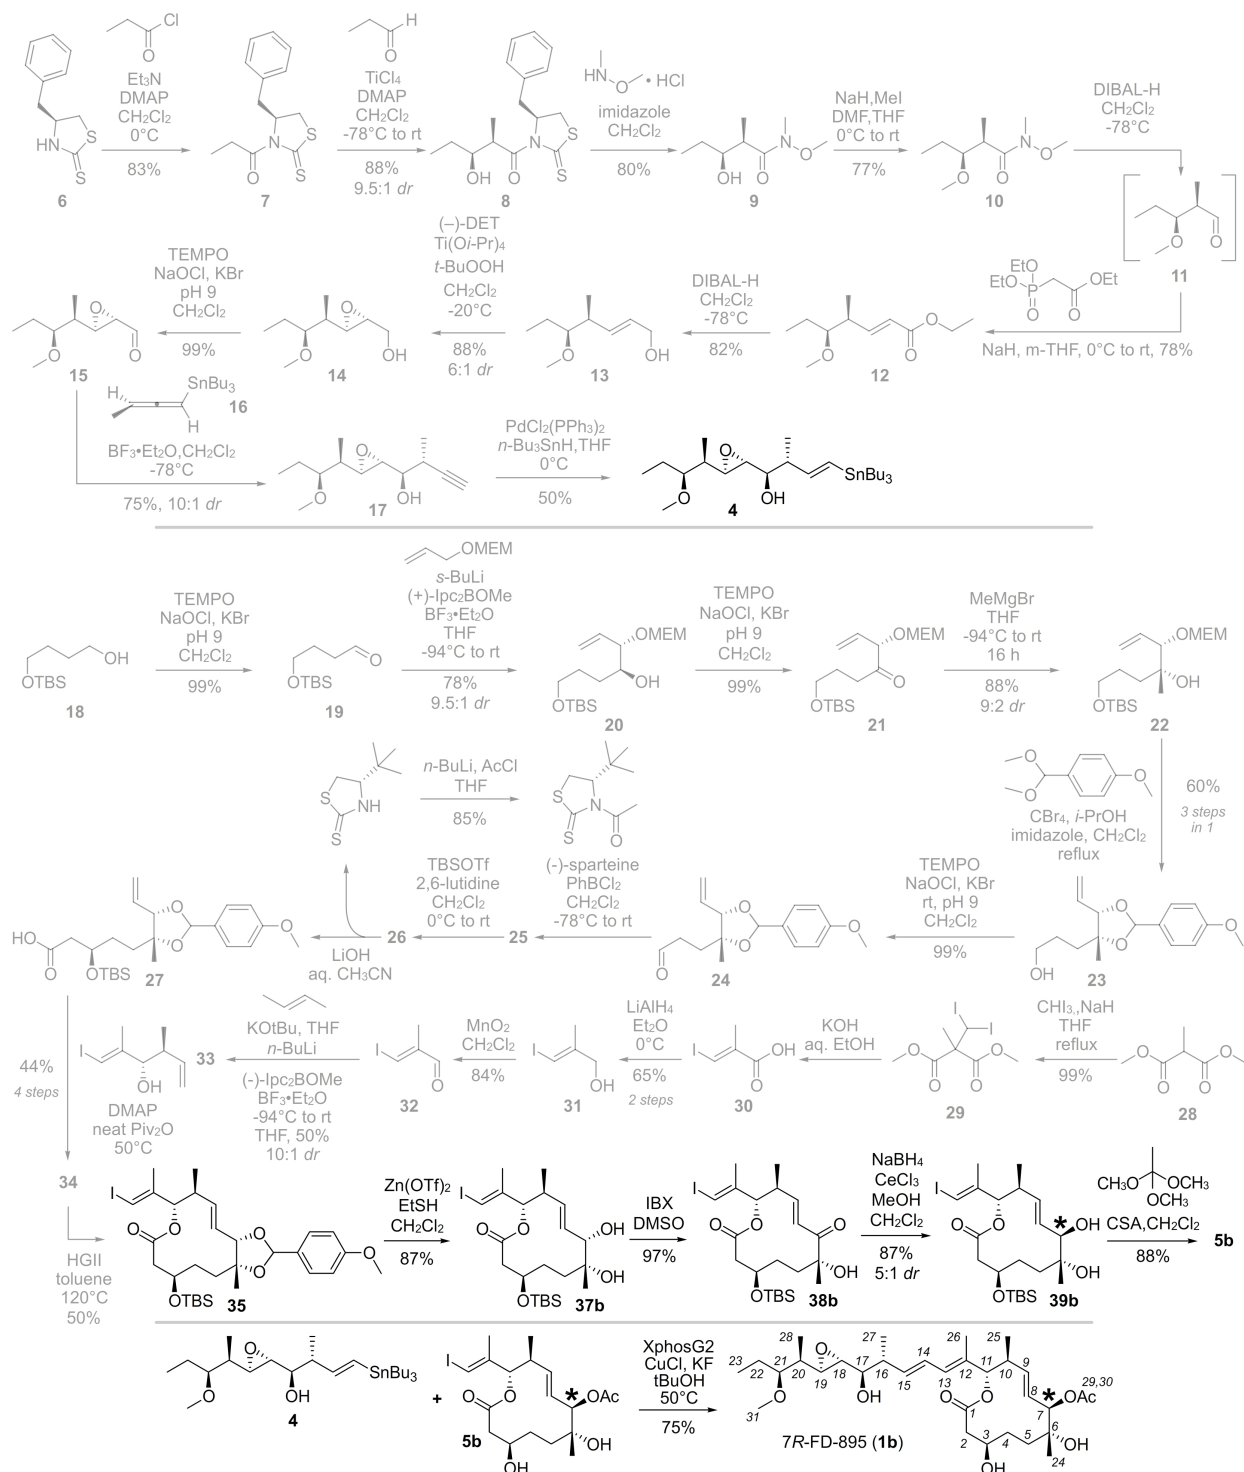

**Figure S3.** Synthesis of 7R-FD-895 (**1b**) from core **5b**, prepared in 4 steps from intermediate **35**, and side chain **4**. The entire synthetic pathway is shown using the methods and materials prepared in Chan *et al.* 2020.<sup>25</sup> In this publication, a central route was developed to enable preparation of analogues of FD-895 (**1**), these steps are shown in grey. Steps used specifically to prepare **1b** are shown in black. Experimental procedures are provided for these (black) steps.

**Table S3. NMR data for 7R-FD-895 (1b) in C<sub>6</sub>D<sub>6</sub>**

| Position | $\delta_H$ , mult ( <i>J</i> in Hz) | $\delta_C$ | <sup>1</sup> H, <sup>1</sup> H-COSY | <sup>1</sup> H, <sup>1</sup> H-NOESY  | <sup>1</sup> H, <sup>13</sup> C-HMBC |
|----------|-------------------------------------|------------|-------------------------------------|---------------------------------------|--------------------------------------|
| 1        |                                     | 172.3      |                                     |                                       |                                      |
| 2'       | 2.35, m                             | 39.0       | 2', 3                               | 3, 4''w, 5'                           | 1, 3, 4                              |
| 2''      | 2.29, dd (14.6, 3.1)                |            | 2'', 3                              | 3, 4'', 5'                            | 1, 3, 4                              |
| 3        | 3.57, bs                            | 69.6       | 3OH, 4'                             | 2', 2'', 4', 4''w, 5'w, 5'', 24       | N/A                                  |
| 3OH      | 3.67, d (10.6)                      |            | 3                                   | 4', 5''                               | conformers                           |
| 4'       | 1.66, m                             | 30.6       | 3, 4'', 5', 5''                     | 3, 3OH, 5', 5'', 7w                   | conformers                           |
| 4''      | 1.82, m                             |            | 3, 4', 5', 5''                      | 3w, 5', 5'', 7w                       | 2                                    |
| 5'       | 1.58, m                             | 36.5       | 4', 4'', 5''                        | 4'                                    | conformers                           |
| 5''      | 0.95, m                             |            | 4', 4'', 5'                         | 4''                                   | conformers                           |
| 6        |                                     | 73.8       |                                     |                                       |                                      |
| 6OH      |                                     |            |                                     |                                       |                                      |
| 7        | 5.40, m                             | 77.9       | 8                                   | 4', 8, 10, 15, 24, 27w                | 5, 6, 8, 9, 29                       |
| 8        | 5.92, dd (15.4, 2.3)                | 128.0      | 7, 9                                | 7, 9, 10, 11, 13w, 14w, 15w, 22       | 7, 10                                |
| 9        | 5.38, m                             | 130.7      | 8, 10                               | 4', 8, 10, 11, 15, 18, 25             | 7, 10                                |
| 10       | 2.47, tq (10.1, 6.7)                | 41.0       | 11, 25                              | 8, 9, 25, 26                          | 8, 9, 11, 25                         |
| 11       | 5.36, d (10.7)                      | 82.9       | 10                                  | 4', 8, 10, 13, 25                     | 1, 9, 10, 12w, 13, 25, 26            |
| 12       |                                     | 131.9      |                                     |                                       |                                      |
| 13       | 6.15, d (10.9)                      | 131.5      | 14, 26w                             | 8, 9, 11, 15, 28                      | 11, 15, 26                           |
| 14       | 6.26, dd (15.0, 10.8)               | 126.2      | 13, 15                              | 15, 16, 22', 26, 27                   | 12, 13, 16                           |
| 15       | 5.50, dd (15.0, 8.7)                | 138.2      | 14, 16                              | 8w, 13, 14, 16, 17, 18w, 27           | 13, 16, 17, 27                       |
| 16       | 2.37, m                             | 42.7       | 15, 17, 26                          | 14, 15, 27                            | 14, 15, 17, 18, 27                   |
| 17       | 3.06, t (6.6)                       | 75.3       | 16, 18                              | 16w, 19, 27                           | 15, 16, 18, 19, 27                   |
| 17OH     |                                     |            |                                     |                                       |                                      |
| 18       | 2.65, dd (5.7, 2.2)                 | 60.7       | 17                                  | 10, 15, 16, 19, 20, 27w, 28w          | 17, 19, 20w                          |
| 19       | 2.85, dd (8.2, 2.3)                 | 59.7       | 20                                  | 10w, 16w, 17w, 18, 20w, 21w, 22'w, 28 | 18, 20, 28                           |
| 20       | 1.30, m                             | 39.4       | 19, 28                              | 18, 23, 28                            | 18, 19, 27, 28                       |
| 21       | 3.14, td (6.3, 4.0)                 | 83.6       | 20, 22', 22''                       | 19, 20, 22', 22''w, 23, 28            | 19w, 20, 23, 28, 31                  |
| 22'      | 1.57, m                             | 23.8       | 23                                  | 21, 22 $\beta$ , 23                   | 20, 21, 23                           |
| 22''     | 1.36, m                             |            | 23                                  | 21, 22 $\alpha$ , 23                  | 20, 21, 23                           |
| 23       | 0.84, t (7.5)                       | 10.0       | 22', 22''                           | 21, 22', 22''                         | 21, 22                               |
| 24       | 1.00, s                             | 24.7       |                                     | 3OH, 5', 5'', 7                       | 5, 6, 7                              |
| 25       | 0.76, d (6.8)                       | 17.1       | 10                                  | 9, 10, 11, 20, 26                     | 9, 10, 11                            |
| 26       | 1.62, bs                            | 11.5       |                                     | 10, 11, 14                            | 11, 12, 13, 14, 15                   |
| 27       | 1.12, d (6.8)                       | 16.9       | 16                                  | 14, 15, 16, 17w                       | 15, 16, 17                           |
| 28       | 0.84, d (7.0)                       | 10.6       | 20                                  | 19, 21                                | 19, 20, 21                           |
| 29       |                                     | 169.2      |                                     |                                       |                                      |
| 30       | 1.67, s                             | 20.4       |                                     |                                       | 29                                   |
| 31       | 3.24, s                             | 57.8       |                                     | 19, 21, 22', 23, 28                   | 21                                   |

<sup>a</sup> Position numbering is provided in Supporting Figure S3.

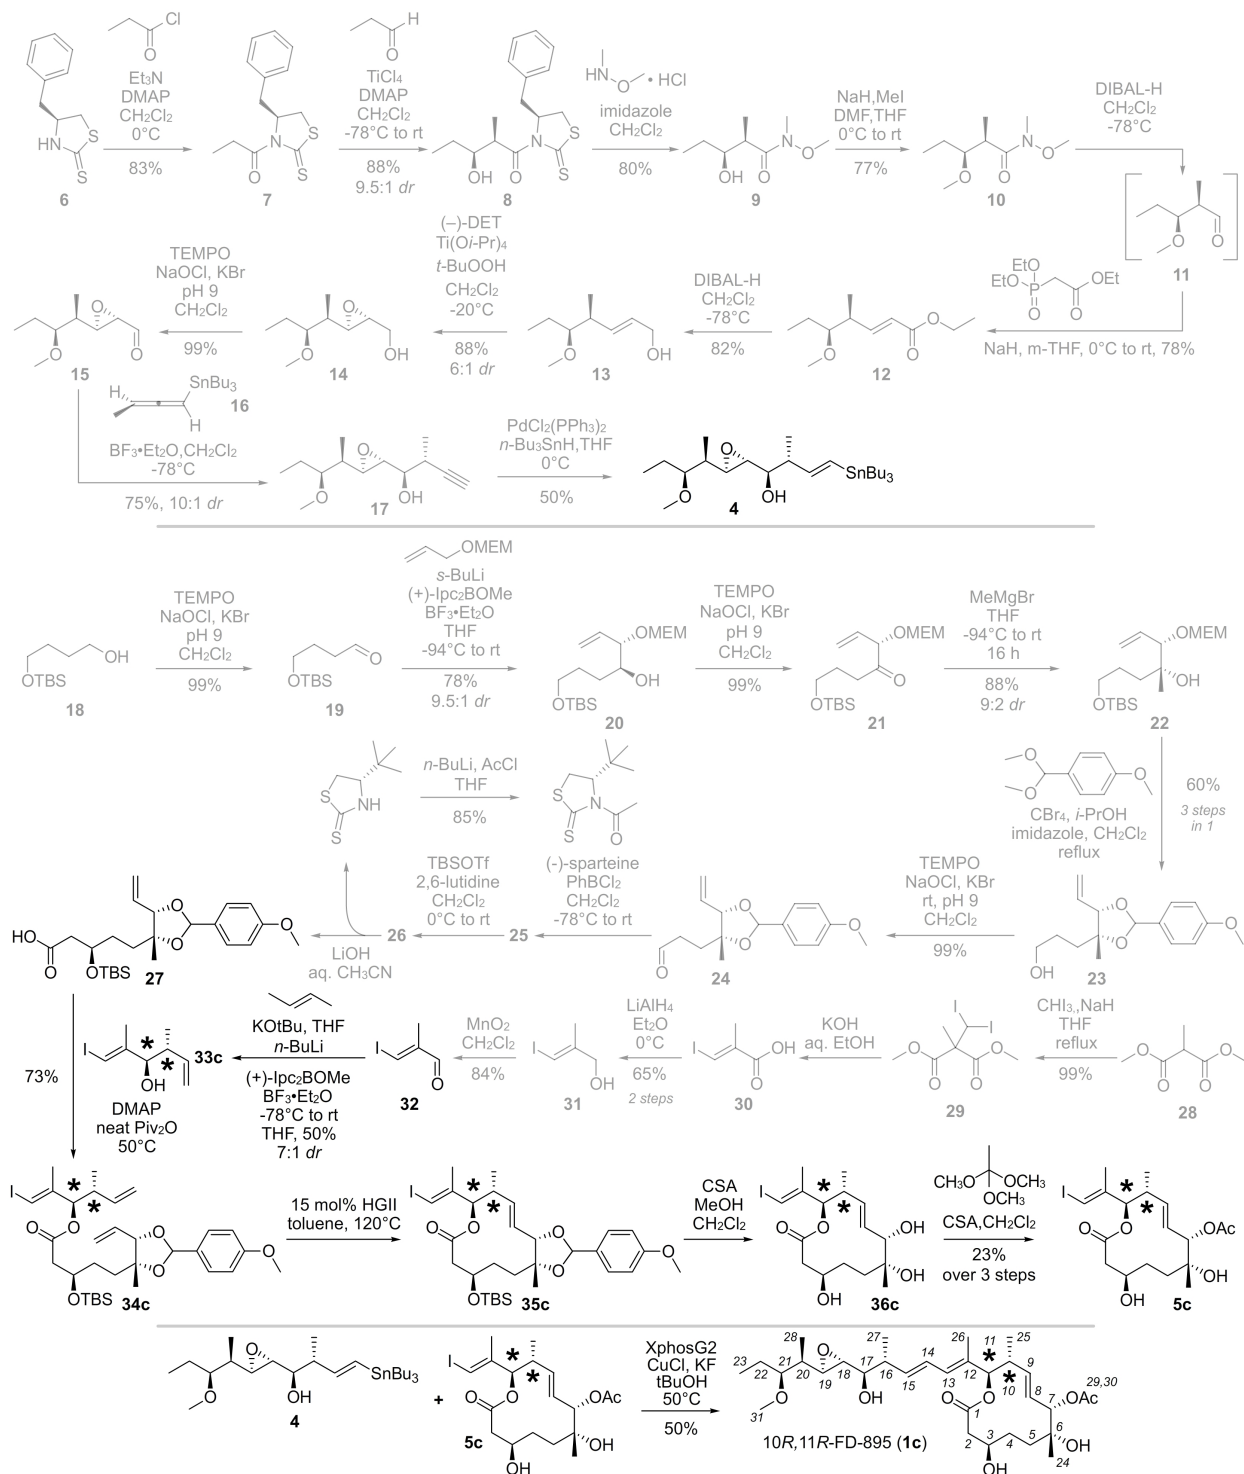

**Figure S4.** Synthesis of 10R,11R-FD-895 (**1c**) from core **5c**, prepared in 5 steps from **25** and **32**, and side chain **4**. The entire synthetic pathway is shown using the methods and materials prepared in Chan *et al.* 2020.<sup>25</sup> In this publication, a central route was developed to enable preparation of analogues of FD-895 (**1**), these steps are shown in grey. Steps used specifically to prepare **1c** are shown in black. Experimental procedures are provided for these (black) steps

**Table S4. NMR data for 10R,11R -FD-895 (1c) in C<sub>6</sub>D<sub>6</sub>**

| Position | $\delta_{\text{H}}$ , mult ( $J$ in Hz) | $\delta_{\text{C}}$ | <sup>1</sup> H, <sup>1</sup> H-COSY | <sup>1</sup> H, <sup>1</sup> H-NOESY | <sup>1</sup> H, <sup>13</sup> C-HMBC |
|----------|-----------------------------------------|---------------------|-------------------------------------|--------------------------------------|--------------------------------------|
| 1        |                                         | 169.6               |                                     |                                      |                                      |
| 2'       | 2.38, m                                 | 40.1                | 2', 3                               | 3w, 5'                               | 1, 3, 4                              |
| 2''      | 2.25, dd (13.3, 5.3)                    |                     | 2', 3                               | 3                                    | 1, 3, 4                              |
| 3        | 4.14, m                                 | 67.8                | 2', 2''w                            | 2'w, 2'', 4', 4'', 5'w, 24           |                                      |
| 3OH      |                                         |                     |                                     |                                      |                                      |
| 4'       | 1.29, m                                 | 27.5                | 3, 4'', 5', 5''                     | 3, 4'', 5', 5''                      | 5, 3                                 |
| 4''      | 1.20, m                                 |                     | 3w, 4', 5', 5''                     | 3, 4', 5', 5'', 24                   | 5                                    |
| 5'       | 1.83, m                                 | 30.7                | 4', 4'', 5''                        | 2', 4', 4'', 8, 25                   | 3w, 4, 6, 7w, 24                     |
| 5''      | 1.75, dt (13.4, 6.7)                    |                     | 4', 4'', 5'                         | 4', 4'', 24                          | 3w, 4, 6, 7, 24, 30                  |
| 6        |                                         | 73.5                |                                     |                                      |                                      |
| 6OH      | 1.75, s                                 |                     |                                     |                                      |                                      |
| 7        | 5.23, d (9.8)                           | 79.3                | 8                                   | 4', 8w, 9, 24                        | 8, 9, 24w, 29                        |
| 8        | 5.90, dd (15.2, 9.8)                    | 126.6               | 7, 9, 10w                           | 5', 7, 9, 10                         | 6, 10                                |
| 9        | 5.58, dd (15.3, 10.0)                   | 140.3               | 8, 10                               | 4', 7, 8, 10, 11, 25                 | 7, 10                                |
| 10       | 2.43, m                                 | 41.2                | 11, 25                              | 8, 9, 11, 25, 26                     | 8, 9, 11, 25                         |
| 11       | 5.18, d (10.8)                          | 82.1                | 10                                  | 9, 10w, 13, 25, 26w                  | 1, 9, 10, 12, 13, 25, 26             |
| 12       |                                         | 132.2               |                                     |                                      |                                      |
| 13       | 6.17, d (10.8)                          | 131.3               | 14, 26w                             | 9, 11, 15, 25, 26                    | 11, 15, 26                           |
| 14       | 6.27, dd (15.1, 10.8)                   | 126.5               | 13, 15                              | 15, 16, 26, 27                       | 12, 13, 16                           |
| 15       | 5.53, dd (15.1, 8.8)                    | 137.8               | 14, 16                              | 13, 14, 16, 17, 18w, 27              | 13, 16, 17                           |
| 16       | 2.36, m                                 | 42.8                | 15, 17, 27                          | 14, 15, 17, 18, 27                   | 14, 15, 17, 18, 27                   |
| 17       | 3.12, m                                 | 74.8                | 16, 18                              | 15, 16, 18, 19, 27                   | 15w, 16, 19, 25                      |
| 17OH     | 1.55, bs                                |                     |                                     |                                      |                                      |
| 18       | 2.69, dd (5.1, 2.2)                     | 60.3                | 17, 19w                             | 14w, 15, 16, 17, 19, 20, 27, 28      | 17, 19, 20                           |
| 19       | 2.90, dd (8.1, 2.3)                     | 59.4                | 18w, 20                             | 17, 18w, 20, 22'w, 28                | 17w, 18, 20, 21w                     |
| 20       | 1.31, m                                 | 39.2                | 19, 28                              | 19, 21, 28                           | 19, 23                               |
| 21       | 3.14, m                                 | 83.6                | 20, 22', 22''                       | 20, 22', 22'', 23                    | 19, 20, 22w, 23, 28 31               |
| 22'      | 1.60, m                                 | 23.9                | 21, 22'', 23                        | 21, 22'', 23                         | 20, 21, 23                           |
| 22''     | 1.39, m                                 |                     | 21, 22', 23                         | 19w, 21, 22', 23, 31                 | 20, 21, 23                           |
| 23       | 0.84, t (7.5)                           | 10.1                | 22', 22''                           | 20, 21, 22', 22'', 31w               | 21, 22                               |
| 24       | 1.06, s                                 | 24.8                |                                     | 4'w, 4'', 5'w, 5'', 7                | 5, 6, 7                              |
| 25       | 0.72, d (6.7)                           | 16.5                | 10                                  | 5', 9, 10, 11, 13, 26                | 9, 10, 11                            |
| 26       | 1.58, s                                 | 12.0                | 13                                  | 10, 14, 25w                          | 11, 12, 13, 14                       |
| 27       | 1.11, d (6.8)                           | 16.9                | 16                                  | 14, 15, 16, 17, 18w                  | 15, 16, 17                           |
| 28       | 0.87, d (7.0)                           | 10.5                | 20                                  | 18, 19, 20, 21, 22'                  | 19, 20, 21                           |
| 29       |                                         | 169.2               |                                     |                                      |                                      |
| 30       | 1.63, s                                 | 20.8                |                                     |                                      | 29                                   |
| 31       | 3.24, s                                 | 57.7                |                                     | 19w, 21, 22'', 23                    | 21                                   |

<sup>a</sup> Position numbering is provided in Supporting Figure S4.

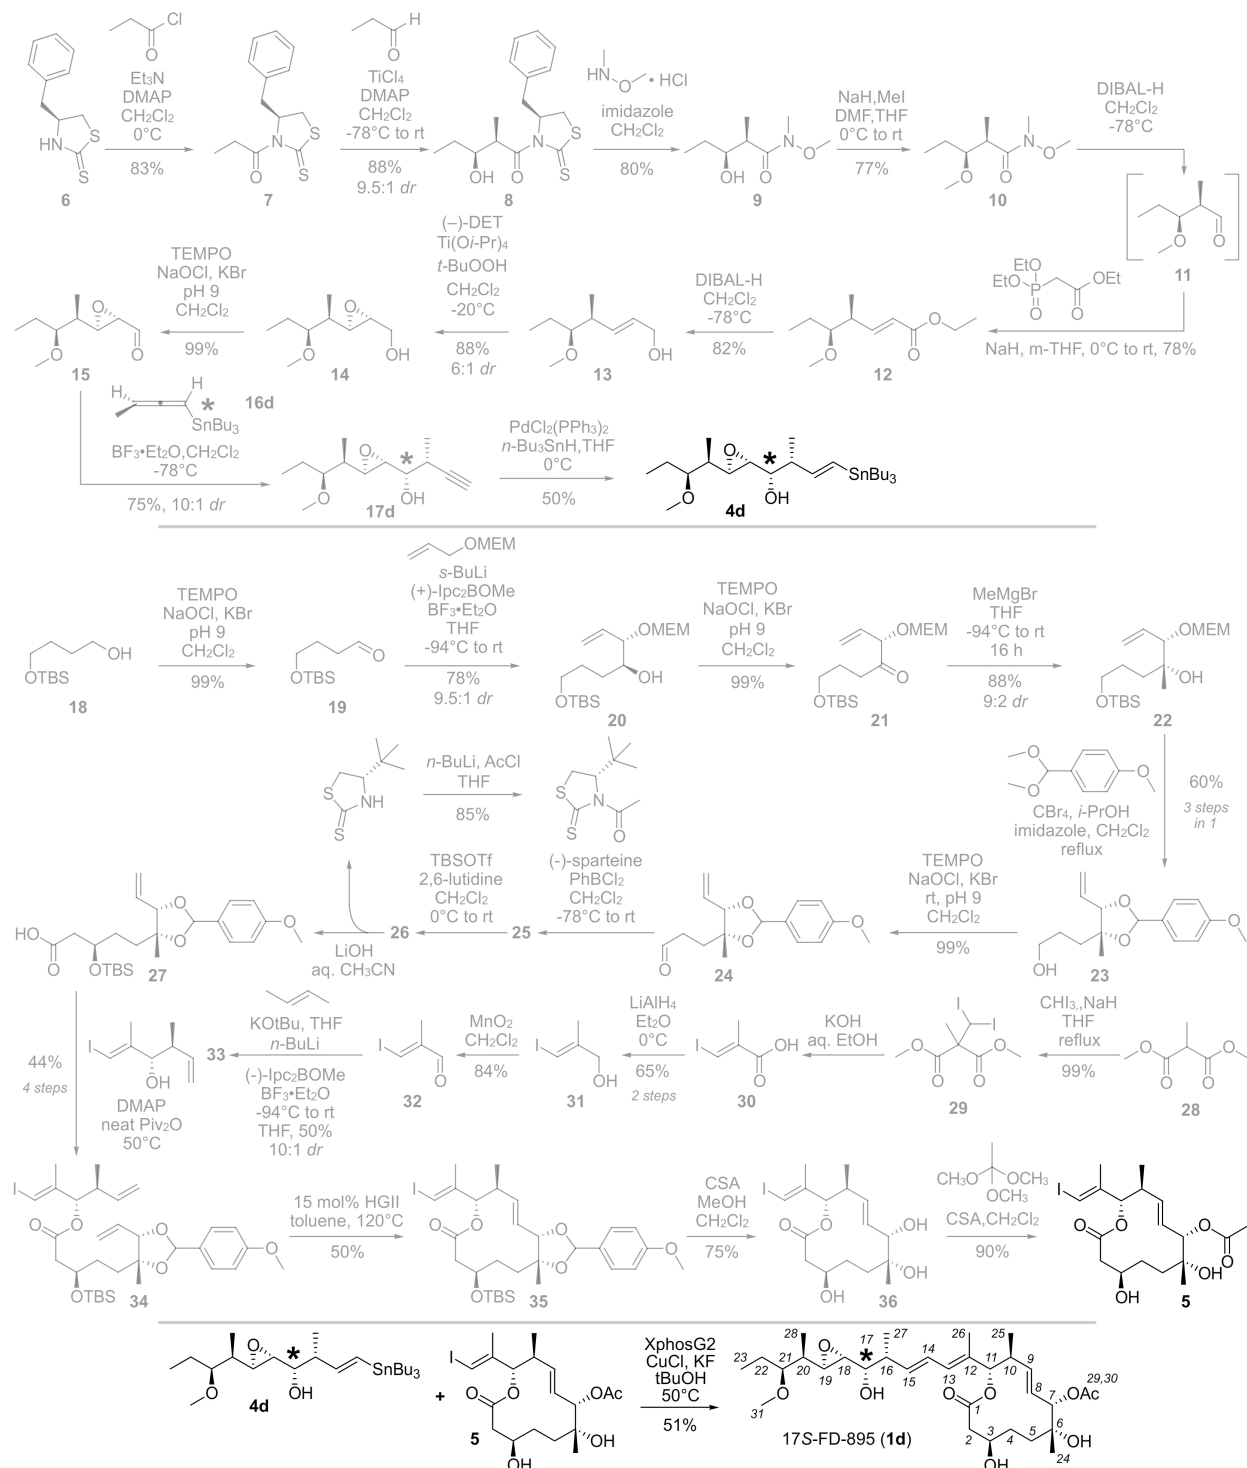

**Figure S5.** Synthesis of 17S-FD-895 (**1d**) from core **5** and side chain **4d**. The entire synthetic pathway is shown using the methods and materials prepared in Chan *et al.* 2020.<sup>25</sup> In this publication, a central route was developed to enable preparation of analogues of FD-895 (**1**), these steps are shown in grey. Steps used specifically to prepare **1d** are shown in black. Experimental procedures are provided for these (black) steps



**Table S5. NMR data for 17S-FD-895 (1d) in C<sub>6</sub>D<sub>6</sub>**

| Position | $\delta_{\text{H}}$ , mult ( $J$ in Hz) | $\delta_{\text{C}}$ | $^1\text{H}$ , $^1\text{H}$ -COSY | $^1\text{H}$ , $^1\text{H}$ -NOESY | $^1\text{H}$ , $^{13}\text{C}$ -HMBC |
|----------|-----------------------------------------|---------------------|-----------------------------------|------------------------------------|--------------------------------------|
| 1        |                                         | 171.8               |                                   |                                    |                                      |
| 2'       | 2.29, dd (14.8, 3.9)                    | 38.2                | 2', 3                             | 3, 3OHw, 4'/5'w                    | 3                                    |
| 2''      | 2.19, dd (14.8, 3.0)                    |                     | 2'', 3                            | 3, 4'/5'                           | 1                                    |
| 3        | 3.49, td (11.1, 3.5)                    | 69.0                | 3OH, 4'w, 4''                     | 2', 2'', 3OH, 4'/5', 5''           |                                      |
| 3OH      | 3.63, d (11.2)                          |                     | 3                                 | 2', 3, 4'', 6OH                    | 3                                    |
| 4'       | 1.57, m                                 | 30.0                | 3w, 4'', 5', 5''                  | 2'', 3, 5'', 24                    |                                      |
| 4''      | 1.25, m                                 |                     | 3, 4', 5', 5''                    | 3OHw, 5', 7, 9, 24w                | 3w                                   |
| 5'       | 1.55, m                                 | 35.5                | 3, 4''                            | 2'', 3OH, 4'', 6OH, 8              |                                      |
| 5''      | 1.20, m                                 |                     | 5'                                | 3, 4', 7w, 24                      | 4w, 6w, 7w                           |
| 6        |                                         | 72.5                |                                   |                                    |                                      |
| 6OH      | 1.75, s                                 |                     |                                   | 3OH, 5''w, 7w, 8, 24               | 5, 6, 17                             |
| 7        | 5.26, d (1.5)                           | 78.8                | 8                                 | 4'', 8, 9w, 24                     | 8, 29                                |
| 8        | 5.83, dd (15.2, 9.8)                    | 140.3               | 7, 9                              | 4'/5', 7, 9, 10w, 25               | 7, 10w                               |
| 9        | 5.62, dd (15.2, 10.0)                   | 126.0               | 8, 10                             | 4'/5', 7, 8, 10, 25                | 10, 25w                              |
| 10       | 2.39, m                                 | 40.8                | 9, 11, 25                         | 7w, 8, 9w, 11w, 25, 26             | 11                                   |
| 11       | 5.24, d (2.4)                           | 82.2                | 10                                | 9, 10, 13, 25, 26                  | 1, 12, 13, 26                        |
| 12       |                                         | 131.0               |                                   |                                    |                                      |
| 13       | 6.11, d (10.7)                          | 131.4               | 14, 26w                           | 11, 14, 15, 25, 26w                | 11, 14w, 15, 26                      |
| 14       | 6.26, dd (15.2, 10.8)                   | 126.1               | 13, 15                            | 13, 15, 16, 26, 27w                | 12w, 13w                             |
| 15       | 5.80, dd (15.2, 8.3)                    | 137.6               | 14, 16                            | 13, 14, 27                         | 12, 13, 14, 16, 27                   |
| 16       | 2.36, m                                 | 41.2                | 15, 17, 27                        | 14, 17, 27                         | 15                                   |
| 17       | 3.42, q (3.7)                           | 73.0                | 16, 17OH, 18                      | 15, 16, 17OH, 18, 19, 27           |                                      |
| 17OH     | 1.55, bs                                |                     |                                   | 17, 19                             | 16, 17                               |
| 18       | 2.56, dd (3.8, 2.2)                     | 57.3                | 17, 19w                           | 15w, 16, 17, 19w, 20, 27, 28       |                                      |
| 19       | 3.01, dd (8.3, 2.3)                     | 59.3                | 18, 20                            | 15w, 17, 17OH, 18w, 20, 21, 28     | 20                                   |
| 20       | 1.33, m                                 | 38.9                | 19, 21, 28                        | 18, 19w, 21, 23, 28                |                                      |
| 21       | 3.15, m                                 | 83.4                | 22', 22''                         | 19, 20, 22', 22'', 23              | 19, 28                               |
| 22'      | 1.63, m                                 | 23.5                | 21, 23                            | 21w, 22'', 23                      | 20w, 21, 23                          |
| 22''     | 1.40, dt (14.0, 6.9)                    |                     | 21, 23                            | 21w, 22', 23                       | 20w, 21, 23                          |
| 23       | 0.85, t (7.5)                           | 9.7                 | 22', 22''                         | 20, 21, 22', 22''                  | 21, 22                               |
| 24       | 1.00, s                                 | 24.4                |                                   | 4'/5', 4'w, 5'', 6OH, 7            | 5, 6, 7                              |
| 25       | 0.70, d (6.7)                           | 16.1                | 10                                | 7, 9, 10, 13, 26                   | 8, 10, 11                            |
| 26       | 1.59, d (1.3)                           | 11.5                | 13                                | 10, 11w, 14, 25                    | 11, 12, 13, 14w, 15w                 |
| 27       | 1.12, d (7.0)                           | 16.9                | 16                                | 9, 14, 15, 16, 17, 18              | 15, 16, 17                           |
| 28       | 0.88, d (6.9)                           | 10.5                | 20                                | 18, 19, 20, 21                     | 19, 20, 21                           |
| 29       |                                         | 168.7               |                                   |                                    |                                      |
| 30       | 1.61, s                                 | 20.4                |                                   |                                    | 29                                   |
| 31       | 3.23, s                                 | 57.4                |                                   | 21, 22', 22'', 23                  | 21                                   |

<sup>a</sup> Position numbering is provided in Supporting Figure S5.

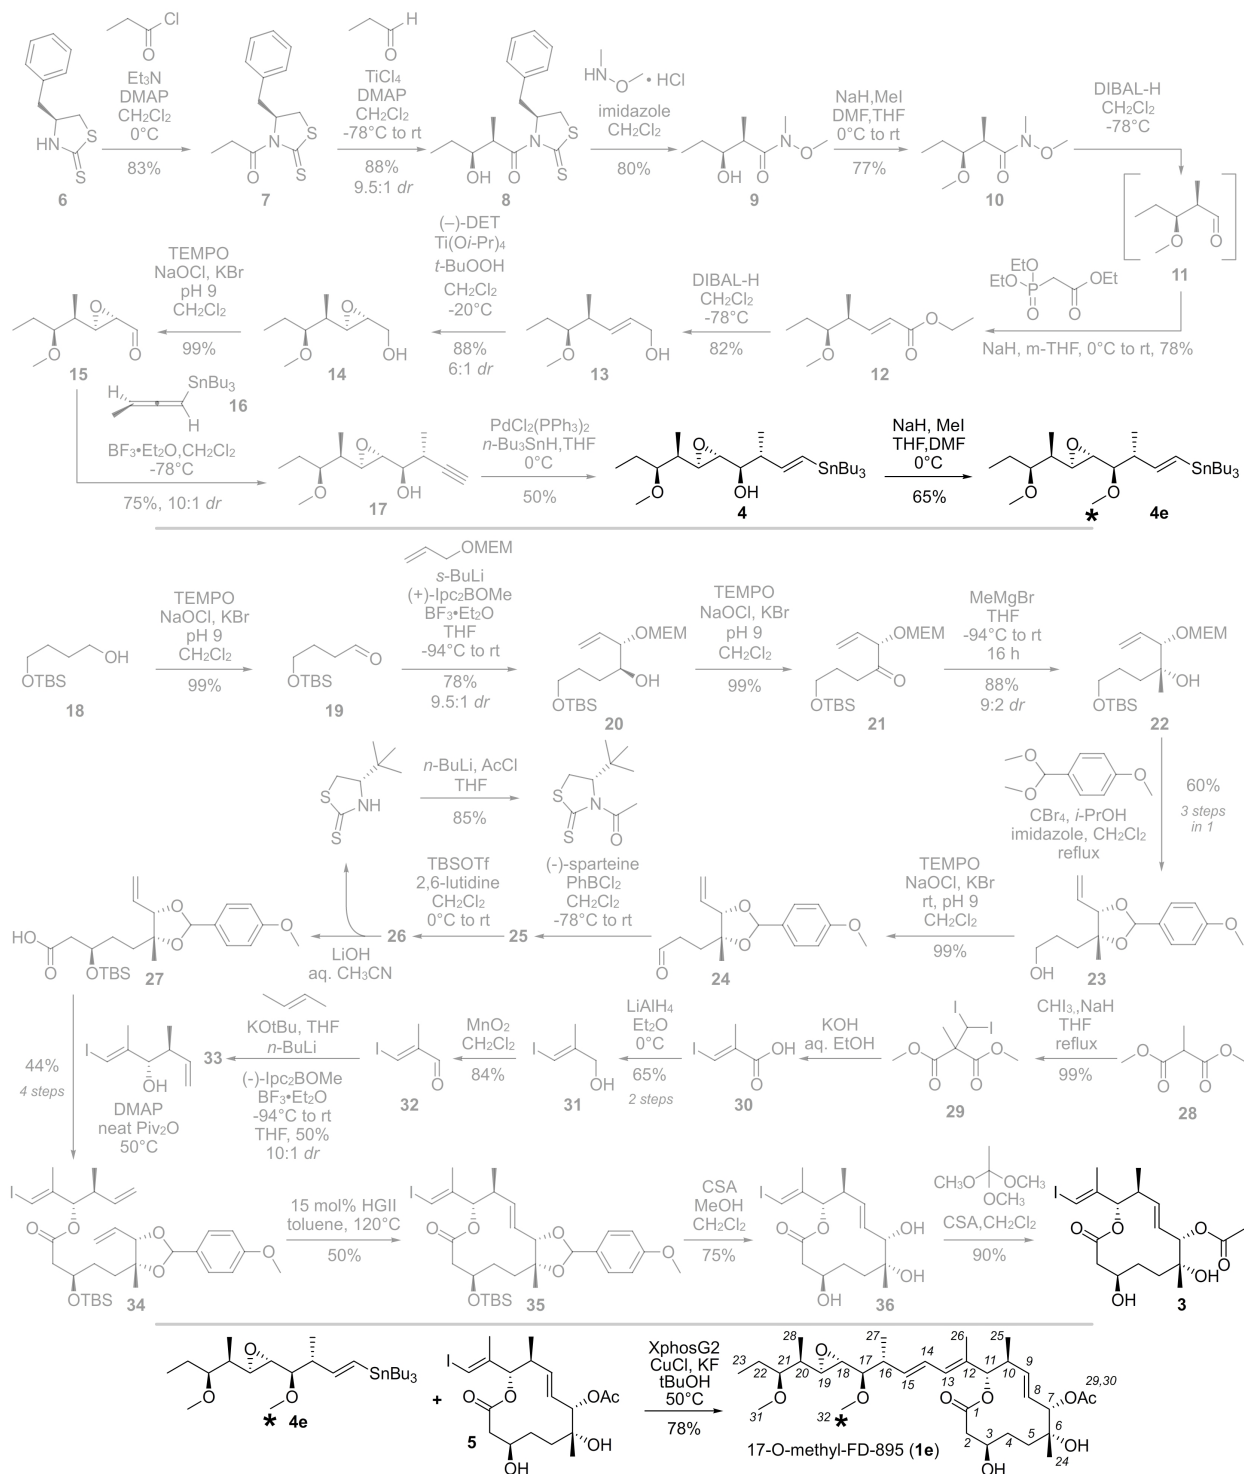

**Figure S6.** Synthesis of 17-O-methyl-FD-895 (**1e**) from core **5** and side chain **4e**, prepared in 1 step from **4**. The entire synthetic pathway is shown using the methods and materials prepared in Chan *et al.* 2020.<sup>25</sup> In this publication, a central route was developed to enable preparation of analogues of FD-895 (**1**), these steps are shown in grey. Steps used specifically to prepare **1e** are shown in black. Experimental procedures are provided for these (black) steps.

**Table S6. NMR data for 17-O-Me-FD-895 (1e) in C<sub>6</sub>D<sub>6</sub>**

| Position | $\delta_{\text{H}}$ , mult ( <i>J</i> in Hz) | $\delta_{\text{C}}$ | <sup>1</sup> H, <sup>1</sup> H-COSY | <sup>1</sup> H, <sup>1</sup> H-NOESY | <sup>1</sup> H, <sup>13</sup> C-HMBC |
|----------|----------------------------------------------|---------------------|-------------------------------------|--------------------------------------|--------------------------------------|
| 1        |                                              | 172.1               |                                     |                                      |                                      |
| 2'       | 2.29, dd (14.8, 3.8)                         | 38.6                | 2'', 3                              | 3, 4'w                               | 1, 3, 4w                             |
| 2''      | 2.20, dd (14.8, 3.0)                         |                     | 2', 3                               | 3, 5'                                | 1                                    |
| 3        | 3.48, m                                      | 69.3                | 2'w, 2''w, 3OH, 4''                 | 2', 2'', 4', 5''                     |                                      |
| 3OH      | 3.62, d (11.1)                               |                     | 3                                   | 3, 6OH                               |                                      |
| 4'       | 1.57, m                                      | 30.4                | 3, 4'', 5', 5''                     | 3, 5'', 7, 8                         | 5, 6, 3, 24                          |
| 4''      | 1.26, m                                      |                     | 4', 5', 5''                         | 2'', 3, 5'', 9                       | 3                                    |
| 5'       | 1.54, m                                      | 35.9                | 4', 4'', 5''                        | 2'', 4'', 8                          | 4, 6, 24                             |
| 5''      | 1.18, m                                      |                     | 4', 4'', 5'                         | 4'                                   | 6, 7                                 |
| 6        |                                              | 73.6                |                                     |                                      |                                      |
| 6OH      | 1.77, s                                      |                     |                                     |                                      |                                      |
| 7        | 5.24, d (5.5)                                | 79.2                | 8                                   | 4''/5'', 8, 9, 24w, 26               | 8w, 9, 24w, 29                       |
| 8        | 5.82, dd (15.2, 9.8)                         | 126.4               | 7, 9                                | 4'/5', 7w, 9, 10, 13w                | 6w, 9w, 10                           |
| 9        | 5.62, dd (15.1, 10.9)                        | 140.7               | 8, 10                               | 4''/5'', 7, 8, 10, 11, 25            | 7, 8w, 10, 25                        |
| 10       | 2.39, tq (10.4, 6.8)                         | 41.1                | 9, 11, 25                           | 8, 9w, 25, 26                        | 8, 9w, 11, 12, 25                    |
| 11       | 5.26, d (6.3)                                | 82.6                | 10                                  | 10, 13, 25, 26                       | 1, 9, 10, 13, 25w, 26                |
| 12       |                                              | 131.7               |                                     |                                      |                                      |
| 13       | 6.12, dd (10.9, 1.5)                         | 131.4               | 14, 26                              | 8w, 11, 14, 15, 25, 26w              | 11, 15, 26                           |
| 14       | 6.23, ddd (15.1, 10.9, 1.04)                 | 125.7               | 13, 15                              | 8w, 13, 15, 16, 26                   | 13w, 16                              |
| 15       | 5.64, dd (15.2, 10.2)                        | 138.7               | 14, 16                              | 13, 14, 16, 17                       | 12, 13, 14w, 16, 27                  |
| 16       | 2.48, dq (14.4, 7.0)                         | 42.6                | 15, 17, 27                          | 14, 15, 17w, 27w, 32w                | 14, 15, 17, 18, 27                   |
| 17       | 2.62, t (7.1)                                | 86.2                | 16, 18                              | 15w, 16, 20, 32                      | 15, 16, 18, 27, 32                   |
| 17OH     |                                              |                     |                                     |                                      |                                      |
| 18       | 2.68, m                                      | 60.6                | 17                                  | 15, 16, 20, 32                       | 17, 19w, 20                          |
| 19       | 2.68, m                                      | 59.1                | 20                                  | 17, 20, 28w,                         | 20, 21w                              |
| 20       | 1.22, m                                      | 39.6                | 19, 28                              | 17w, 21w, 22', 22''                  | 19                                   |
| 21       | 3.20, m                                      | 83.5                | 20, 22', 22''                       | 20, 22', 22'', 23                    | 19w, 20w, 23w                        |
| 22'      | 1.64, m                                      | 23.7                | 21w, 22'', 23                       | 21, 22''                             | 20, 21, 23                           |
| 22''     | 1.37, dp (17.0, 6.7, 6.1)                    |                     | 22', 23                             | 21, 22'                              | 20, 21, 23                           |
| 23       | 0.82, t (7.4)                                | 10.0                | 22', 22''                           | 20, 21, 22'w, 22''w                  | 21, 22                               |
| 24       | 1.01, s                                      | 24.8                |                                     | 4'/5', 7                             | 5, 6, 7                              |
| 25       | 0.71, d (6.8)                                | 16.4                | 10                                  | 9w, 10, 11w, 13, 26                  | 9, 10, 11                            |
| 26       | 1.59, d (1.3)                                | 11.8                | 13                                  | 8, 10, 11, 14, 25                    | 11, 12, 13, 14w, 15w                 |
| 27       | 1.14, d (6.8)                                | 17.0                | 16                                  | 14, 15, 16, 17                       | 15, 16, 17                           |
| 28       | 0.87, d (7.1)                                | 10.8                | 20                                  | 22', 22''                            | 19, 20, 21                           |
| 29       |                                              | 169.0               |                                     |                                      |                                      |
| 30       | 1.61, s                                      | 20.7                |                                     |                                      | 29                                   |
| 31       | 3.25, s                                      | 57.7                |                                     | 20w, 22', 22''w, 23w, 26w, 32        | 21                                   |
| 32       | 3.50, s                                      | 58.5                |                                     | 6OH, 17, 31w                         | 17                                   |

<sup>a</sup> Position numbering is provided in Supporting Figure S6.

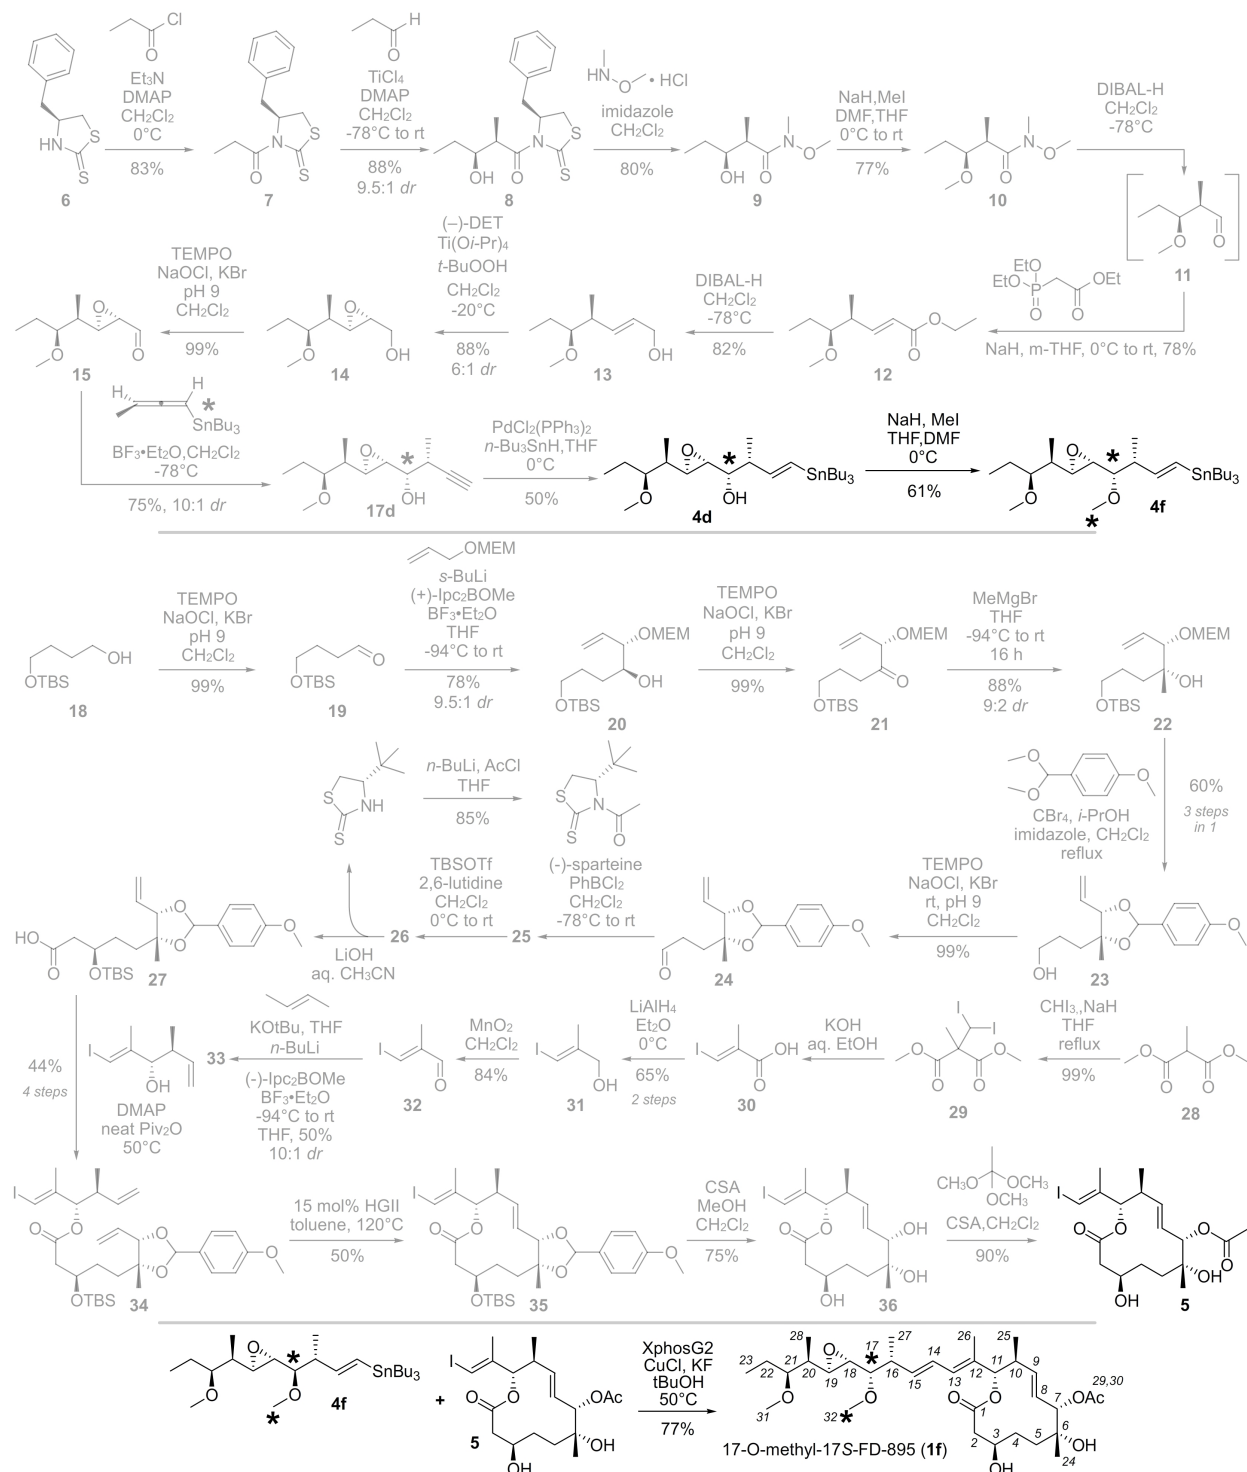

**Figure S7.** Synthesis of 17-O-methyl-17S-FD-895 (**1f**) from core **5** and side chain **4f**, prepared from **4d**. The entire synthetic pathway is shown using the methods and materials prepared in Chan *et al.* 2020.<sup>25</sup> In this publication, a central route was developed to enable preparation of analogues of FD-895 (**1**), these steps are shown in grey. Steps used specifically to prepare **1f** are shown in black. Experimental procedures are provided for these (black) steps

**Table S7. NMR data for 17S-O-Me-17S-FD-895 (1f) in C<sub>6</sub>D<sub>6</sub>**

| Position | $\delta_{\text{H}}$ , mult ( $J$ in Hz) | $\delta_{\text{C}}$ | <sup>1</sup> H, <sup>1</sup> H-COSY | <sup>1</sup> H, <sup>1</sup> H-NOESY | <sup>1</sup> H, <sup>13</sup> C-HMBC |
|----------|-----------------------------------------|---------------------|-------------------------------------|--------------------------------------|--------------------------------------|
| 1        |                                         | 172.1               |                                     |                                      |                                      |
| 2'       | 2.29, dd (14.8, 3.8)                    | 38.6                | 2'', 3                              | 3, 4'w                               | 1, 3, 4w                             |
| 2''      | 2.20, dd (14.8, 3.0)                    |                     | 2', 3                               | 3, 5'                                | 1                                    |
| 3        | 3.48, m                                 | 69.3                | 2'w, 2''w, 3OH, 4''                 | 2', 2'', 4', 5''                     |                                      |
| 3OH      | 3.62, d (11.1)                          |                     | 3                                   | 3, 6OH                               |                                      |
| 4'       | 1.57, m                                 | 30.4                | 3, 4'', 5', 5''                     | 3, 5'', 7, 8                         | 5, 6, 3, 24                          |
| 4''      | 1.26, m                                 |                     | 4', 5', 5''                         | 2'', 3, 5'', 9                       | 3                                    |
| 5'       | 1.54, m                                 | 35.9                | 4', 4'', 5''                        | 2'', 4'', 8                          | 4, 6, 24                             |
| 5''      | 1.18, m                                 |                     | 4', 4'', 5'                         | 4'                                   | 6, 7                                 |
| 6        |                                         | 73.6                |                                     |                                      |                                      |
| 6OH      | 1.77, s                                 |                     |                                     |                                      |                                      |
| 7        | 5.24, d (5.5)                           | 79.2                | 8                                   | 4''/5'', 8, 9, 24w, 26               | 8w, 9, 24w, 29                       |
| 8        | 5.82, dd (15.2, 9.8)                    | 126.4               | 7, 9                                | 4'/5', 7w, 9, 10, 13w                | 6w, 9w, 10                           |
| 9        | 5.62, dd (15.1, 10.9)                   | 140.7               | 8, 10                               | 4''/5'', 7, 8, 10, 11, 25            | 7, 8w, 10, 25                        |
| 10       | 2.39, tq (10.4, 6.8)                    | 41.1                | 9, 11, 25                           | 8, 9w, 25, 26                        | 8, 9w, 11, 12, 25                    |
| 11       | 5.26, d (6.3)                           | 82.6                | 10                                  | 10, 13, 25, 26                       | 1, 9, 10, 13, 25w, 26                |
| 12       |                                         | 131.7               |                                     |                                      |                                      |
| 13       | 6.12, dd (10.9, 1.5)                    | 131.4               | 14, 26                              | 8w, 11, 14, 15, 25, 26w              | 11, 15, 26                           |
| 14       | 6.23, ddd (15.1, 10.9, 1.04)            | 125.7               | 13, 15                              | 8w, 13, 15, 16, 26                   | 13w, 16                              |
| 15       | 5.64, dd (15.2, 10.2)                   | 138.7               | 14, 16                              | 13, 14, 16, 17                       | 12, 13, 14w, 16, 27                  |
| 16       | 2.48, dq (14.4, 7.0)                    | 42.6                | 15, 17, 27                          | 14, 15, 17w, 27w, 32w                | 14, 15, 17, 18, 27                   |
| 17       | 2.62, t (7.1)                           | 86.2                | 16, 18                              | 15w, 16, 20, 32                      | 15, 16, 18, 27, 32                   |
| 17OH     |                                         |                     |                                     |                                      |                                      |
| 18       | 2.68, m                                 | 60.6                | 17                                  | 15, 16, 20, 32                       | 17, 19w, 20                          |
| 19       | 2.68, m                                 | 59.1                | 20                                  | 17, 20, 28w,                         | 20, 21w                              |
| 20       | 1.22, m                                 | 39.6                | 19, 28                              | 17w, 21w, 22', 22''                  | 19                                   |
| 21       | 3.20, m                                 | 83.5                | 20, 22', 22''                       | 20, 22', 22'', 23                    | 19w, 20w, 23w                        |
| 22'      | 1.64, m                                 | 23.7                | 21w, 22'', 23                       | 21, 22''                             | 20, 21, 23                           |
| 22''     | 1.37, dp (17.0, 6.7, 6.1)               |                     | 22', 23                             | 21, 22'                              | 20, 21, 23                           |
| 23       | 0.82, t (7.4)                           | 10.0                | 22', 22''                           | 20, 21, 22'w, 22''w                  | 21, 22                               |
| 24       | 1.01, s                                 | 24.8                |                                     | 4'/5', 7                             | 5, 6, 7                              |
| 25       | 0.71, d (6.8)                           | 16.4                | 10                                  | 9w, 10, 11w, 13, 26                  | 9, 10, 11                            |
| 26       | 1.59, d (1.3)                           | 11.8                | 13                                  | 8, 10, 11, 14, 25                    | 11, 12, 13, 14w, 15w                 |
| 27       | 1.14, d (6.8)                           | 17.0                | 16                                  | 14, 15, 16, 17                       | 15, 16, 17                           |
| 28       | 0.87, d (7.1)                           | 10.8                | 20                                  | 22', 22''                            | 19, 20, 21                           |
| 29       |                                         | 169.0               |                                     |                                      |                                      |
| 30       | 1.61, s                                 | 20.7                |                                     |                                      | 29                                   |
| 31       | 3.25, s                                 | 57.7                |                                     | 20w, 22', 22''w, 23w, 26w, 32        | 21                                   |
| 32       | 3.50, s                                 | 58.5                |                                     | 6OH, 17, 31w                         | 17                                   |

<sup>a</sup> Position numbering is provided in Supporting Figure S7.

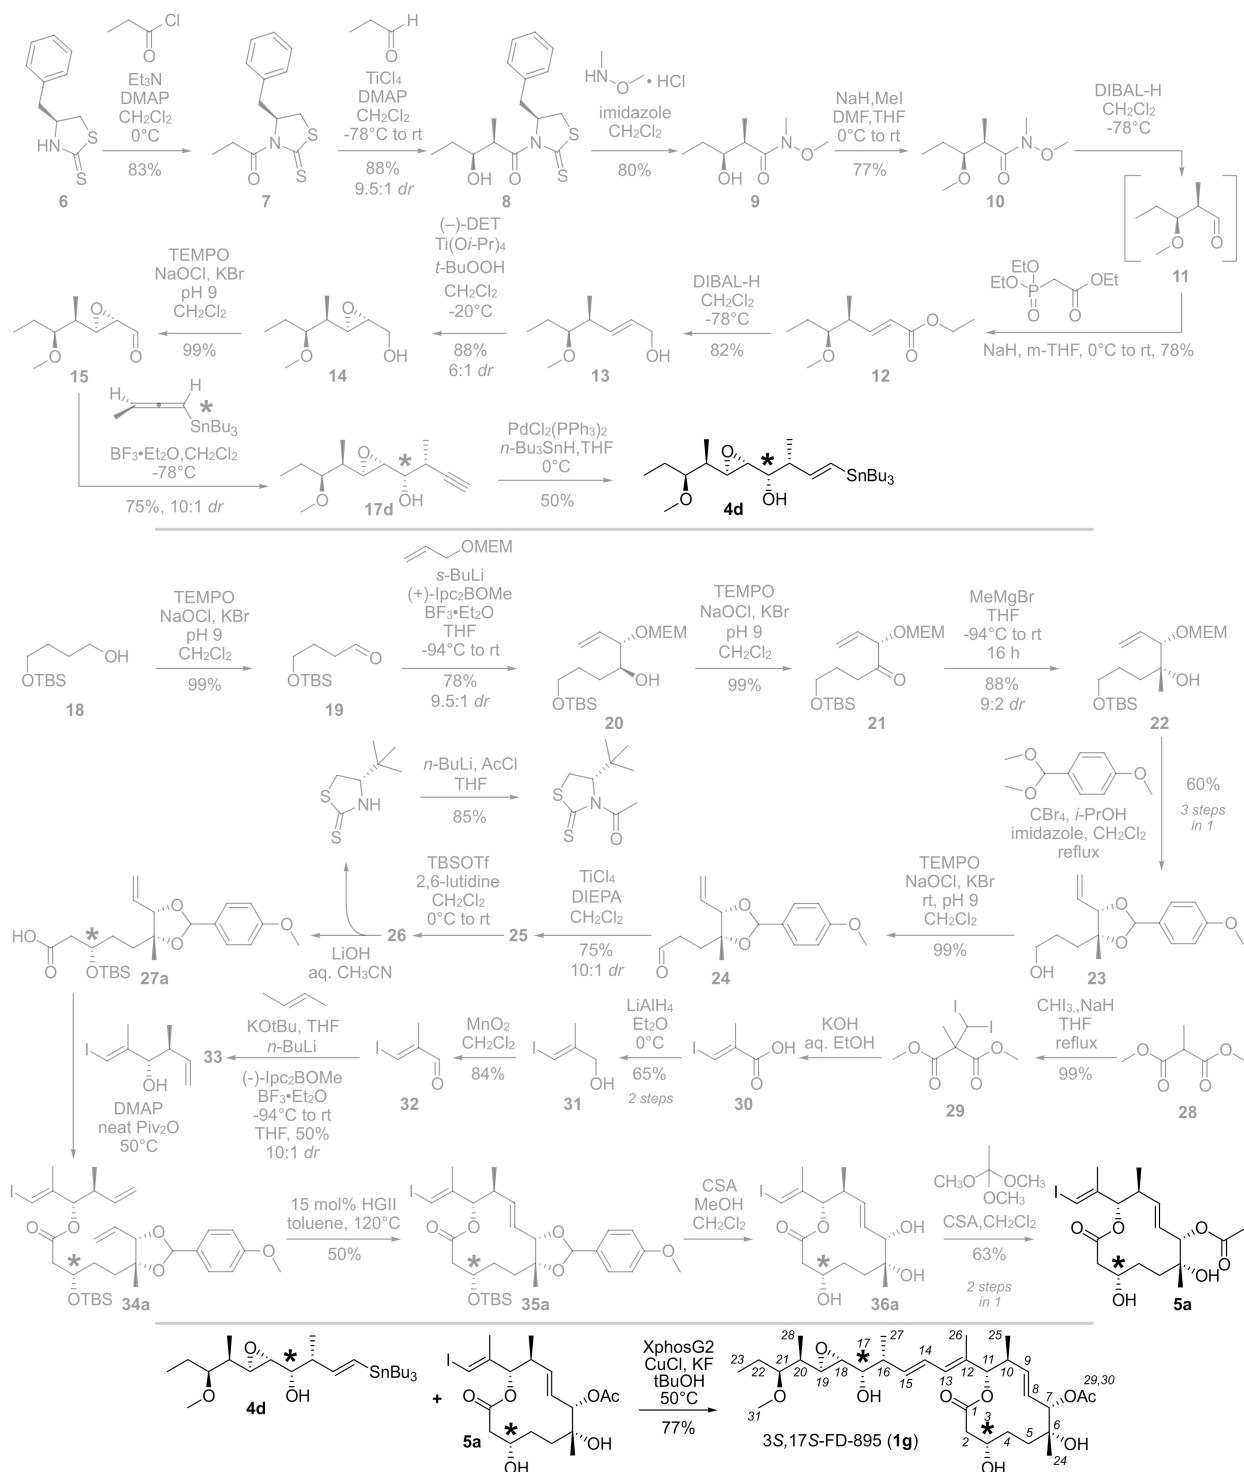

**Figure S8.** Synthesis of 3*S*,17*S*-FD-895 (**1g**) from core **5a** (see Section D) and side chain **4d** (see Section G). The entire synthetic pathway is shown using the methods and materials prepared in Chan *et al.* 2020.<sup>25</sup> In this publication, a central route was developed to enable preparation of analogues of FD-895 (**1**), these steps are shown in grey. Steps used specifically to prepare **1g** are shown in black. Experimental procedures are provided for these (black) steps. **Stille coupling of stannane 4d and core 5a to afford 3*S*,17*S*-FD-895 (**1g**).**

**Table S8.** NMR data for 3*S*,17*S*-FD-895 (**1g**) in C<sub>6</sub>D<sub>6</sub>

| Position | $\delta_{\text{H}}$ , mult ( <i>J</i> in Hz) | $\delta_{\text{C}}$ , Type | <sup>1</sup> H, <sup>1</sup> H-COSY | <sup>1</sup> H, <sup>1</sup> H-NOESY | <sup>1</sup> H, <sup>13</sup> C-HMBC |
|----------|----------------------------------------------|----------------------------|-------------------------------------|--------------------------------------|--------------------------------------|
| 1        |                                              | 169.9                      |                                     |                                      |                                      |
| 2'       | 2.43, dd (13.3, 11.3)                        | 40.2                       | 2'', 3                              | 3w, 5'                               | 1, 3, 4w                             |
| 2''      | 2.30, dd (13.1, 5.4)                         |                            | 2', 3                               | 3                                    | 1, 3, 4                              |
| 3        | 4.20, m                                      | 67.8                       | 2', 2''w                            | 2'w, 2'', 4', 4''                    |                                      |
| 3OH      |                                              |                            |                                     |                                      |                                      |
| 4'       | 1.34, m                                      | 27.6                       | 4'', 5', 5''                        | 3, 5'', 7                            |                                      |
| 4''      | 1.29, m                                      |                            | 3w, 4', 5'w, 5''w                   | 3, 24                                | 2, 3w, 5w                            |
| 5'       | 1.85, td (13.4, 4.0)                         | 30.9                       | 4', 4'', 5''                        | 2', 4'', 8                           | 4w, 6, 24w                           |
| 5''      | 1.78, td (13.6, 4.8)                         |                            | 4', 4'', 5'                         | 4', 4'', 24                          | 4, 6, 7, 24w                         |
| 6        |                                              | 73.6                       |                                     |                                      |                                      |
| 6OH      | 1.92, bs                                     |                            |                                     | 5'', 24                              |                                      |
| 7        | 5.25, d (9.8)                                | 79.3                       | 8                                   | 4', 8, 9, 24                         | 8, 9, 29                             |
| 8        | 5.91, dd (15.2, 9.8)                         | 126.5                      | 7, 9, 10w                           | 5', 7, 9, 10                         | 6w, 10                               |
| 9        | 5.61, dd (15.2, 10.0)                        | 140.5                      | 8, 10                               | 4', 7, 8, 10w, 25                    | 7, 10, 25w                           |
| 10       | 2.47, m                                      | 41.3                       | 9, 11, 25                           | 8w, 25, 26                           | 8, 9, 11, 25w                        |
| 11       | 5.20, d (10.6)                               | 82.3                       | 10                                  | 9, 10w, 13, 25, 26w                  | 1, 9w, 10, 12, 13, 26                |
| 12       |                                              | 131.6                      |                                     |                                      |                                      |
| 13       | 6.19, d (10.9, 1.5)                          | 131.8                      | 14, 26w                             | 11, 15, 25w                          | 11, 15, 26                           |
| 14       | 6.27, ddd (15.1, 10.8, 1.0)                  | 126.6                      | 13, 15                              | 15, 16, 26, 27                       | 12, 13, 16                           |
| 15       | 5.81, dd (15.0, 8.4)                         | 137.6                      | 14, 16                              | 14, 16, 27                           | 12, 13, 16, 17w, 27                  |
| 16       | 2.36, m                                      | 41.5                       | 15, 17w, 27                         | 14, 15, 17, 27                       | 14, 15, 17w, 18w, 27                 |
| 17       | 3.44, t (3.4)                                | 73.0                       | 16, 18                              | 15, 16, 18, 19, 27                   | 15, 16w, 18, 19, 27w                 |
| 17OH     |                                              |                            |                                     |                                      |                                      |
| 18       | 2.57, dd (3.8, 2.2)                          | 59.7                       | 17, 19                              | 17, 20, 27, 28                       | 17w                                  |
| 19       | 3.02, dd (8.2, 2.3)                          | 57.7                       | 18, 20                              | 17, 20w, 28                          | 20                                   |
| 20       | 1.33, m                                      | 39.2                       | 19, 21, 28                          | 18, 21, 28                           | 18w, 19, 21w, 28w                    |
| 21       | 3.14, td (6.2, 4.4)                          | 83.8                       | 20, 22', 22''                       | 20, 22'w, 22'', 23                   | 19, 20w, 23                          |
| 22'      | 1.63, m                                      | 23.9                       | 21, 22'', 23                        | 21w, 22'', 23                        | 20, 21                               |
| 22''     | 1.41, m                                      |                            | 21, 22', 23                         | 22', 23                              | 20, 21, 23                           |
| 23       | 0.86, t (7.4)                                | 10.2                       | 22', 22''                           | 20, 21, 22', 22''                    | 21, 22                               |
| 24       | 1.08, s                                      | 24.8                       |                                     | 5'', 7                               | 5, 6, 7                              |
| 25       | 0.73, d (6.8)                                | 16.5                       | 10                                  | 9, 10, 11                            | 9, 10, 11                            |
| 26       | 1.61, d (1.3)                                | 12.0                       | 13                                  | 10, 14                               | 11, 12, 13                           |
| 27       | 1.12, d (7.0)                                | 17.3                       | 16                                  | 14, 15, 16, 17, 18w                  | 15, 16, 17                           |
| 28       | 0.89, d (7.0)                                | 10.9                       | 20                                  | 18w, 19w, 20, 22'                    | 19, 20, 21                           |
| 29       |                                              | 169.4                      |                                     |                                      |                                      |
| 30       | 1.64, s                                      | 20.9                       |                                     |                                      | 29                                   |
| 31       | 3.23, s                                      | 57.7                       |                                     | 19w, 21, 22'', 23                    | 21                                   |

<sup>a</sup> Position numbering is provided in Supporting Figure S8.



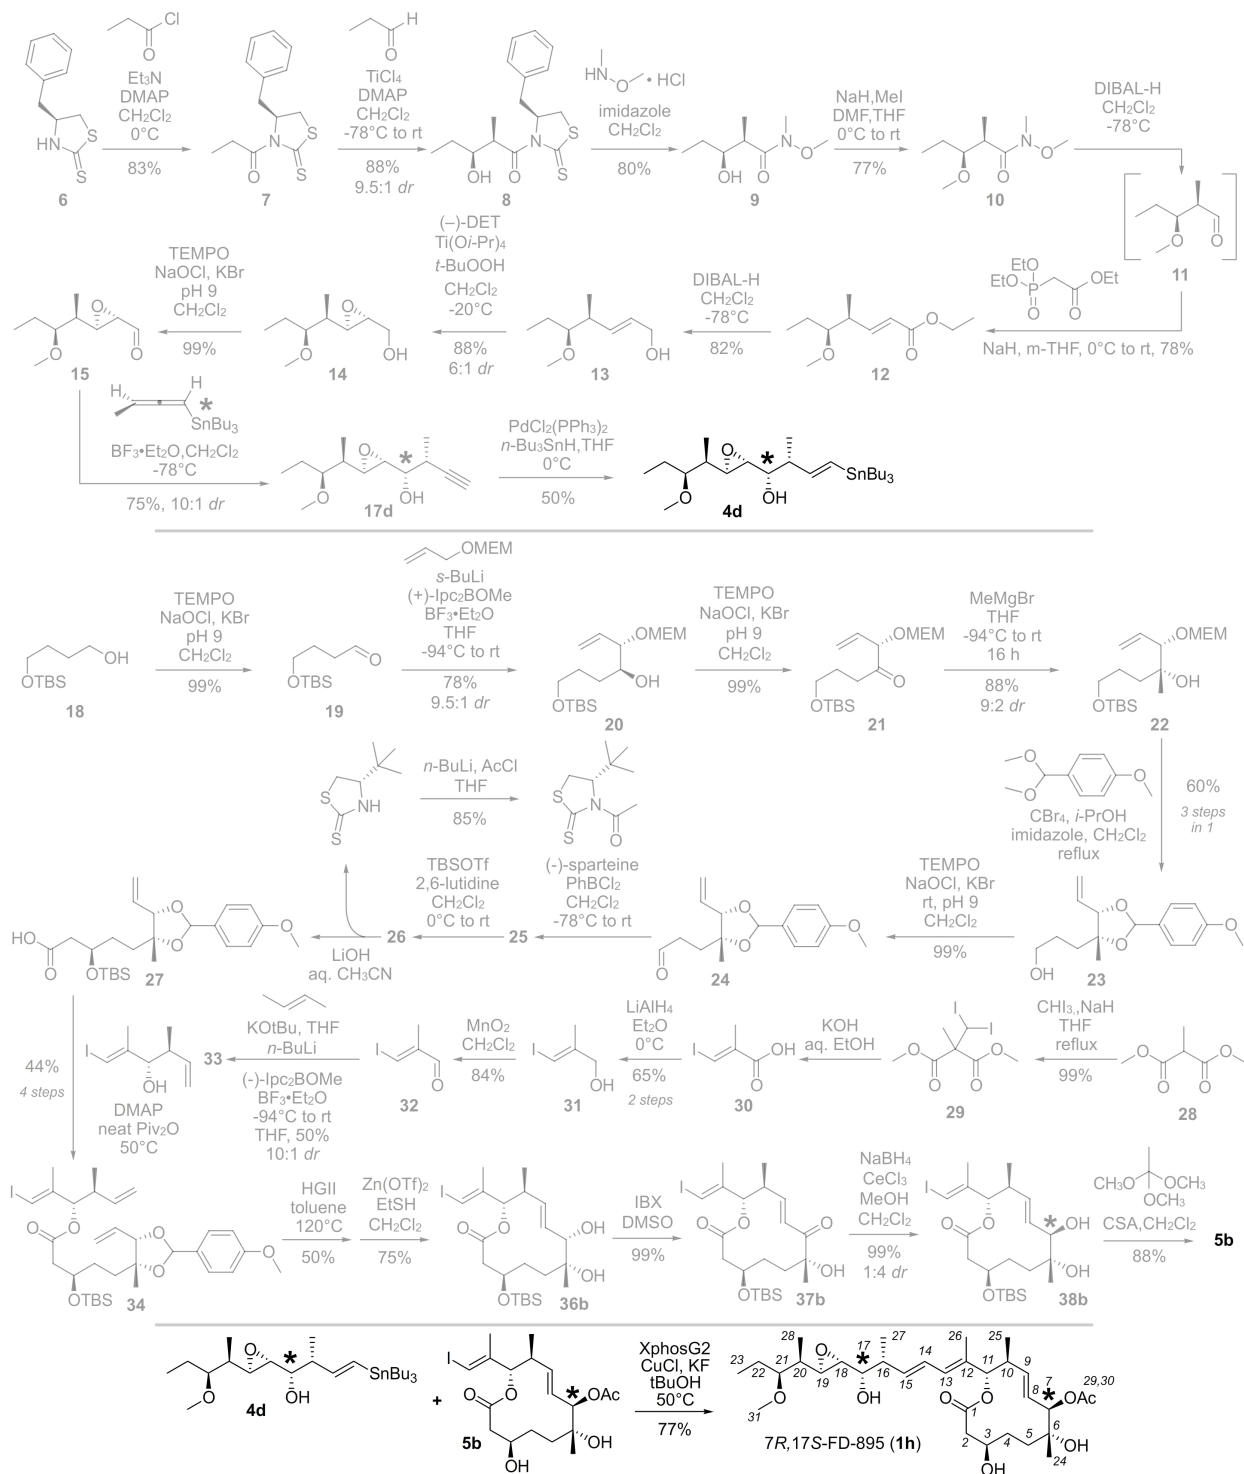

**Figure S9.** Synthesis 7R,17S-FD-895 (**1h**) from core **5b** (Section E) and side chain **4d** (Section G). The entire synthetic pathway is shown using the methods and materials prepared in Chan *et al.* 2020.<sup>25</sup> In this publication, a central route was developed to enable preparation of analogues of FD-895 (**1**), these steps are shown in grey. Steps used specifically to prepare **1h** are shown in black. Experimental procedures are provided for these (black) steps



**Table S9.** NMR data for 7*R*,17*S* -FD-895 (**1h**) in C<sub>6</sub>D<sub>6</sub>

| Position | $\delta_{\text{H}}$ , mult ( <i>J</i> in Hz) | $\delta_{\text{C}}$ | <sup>1</sup> H, <sup>1</sup> H-COSY | <sup>1</sup> H, <sup>1</sup> H-NOESY | <sup>1</sup> H, <sup>13</sup> C-HMBC |
|----------|----------------------------------------------|---------------------|-------------------------------------|--------------------------------------|--------------------------------------|
| 1        | 4.65, d (9.3)                                | 172.3               |                                     |                                      |                                      |
| 2'       | 2.35, m                                      | 39.3                | 2', 3                               | 3, 4''w                              | 1, 3, 4                              |
| 2''      | 2.30, dd (14.6, 3.2)                         |                     | 2'', 3                              | 3, 4''                               | 1, 3, 4w                             |
| 3        | 3.58, ddt (10.8, 7.4,                        | 69.6                | 2'',w3OH, 4', 4''w                  | 3OH, 4'', 17OH, 24w                  |                                      |
| 3OH      | 3.70, d (10.7)                               |                     | 3                                   | 2', 2'', 3, 17OH, 24                 | 2w, 3                                |
| 4'       | 1.80, m                                      | 30.6                | 3, 4'', 5', 5''                     | 3OHw, 5', 7w, 24                     | conformers                           |
| 4''      | 1.62, m                                      |                     | 3w, 4', 5', 5''                     | 2'w, 5''                             | conformers                           |
| 5'       | 1.58, m                                      | 36.5                | 4'w, 4'', 5''                       | 4', 5''                              | conformers                           |
| 5''      | 0.97, m                                      |                     | 4', 4'', 5'                         | 3w, 4''                              | conformers                           |
| 6        |                                              | 73.8                |                                     |                                      |                                      |
| 6OH      | 1.68, bs                                     |                     |                                     | 3OH, 24                              |                                      |
| 7        | 5.41, m                                      | 82.9                | 8                                   | 8, 10w, 24, 26                       | 5, 6, 8, 9, 14, 29                   |
| 8        | 5.93, dd (15.3, 2.5)                         | 127.9               | 7, 9                                | 4''/5', 7, 9, 10                     | 7, 10                                |
| 9        | 5.39, m                                      | 130.7               | 8, 10                               | 4', 8, 10, 25                        | 7, 8, 10                             |
| 10       | 2.48, tq (10.3, 6.7)                         | 41.1                | 11, 25                              | 8, 9w, 25, 26                        | 8, 9, 11, 25w                        |
| 11       | 5.36, d (10.6)                               | 78.0                | 10                                  | 10w, 13, 25, 26w                     | 1, 10, 12, 13, 26                    |
| 12       |                                              | 131.6               |                                     |                                      |                                      |
| 13       | 6.17, d (10.7)                               | 131.6               | 14, 26w                             | 11, 14, 15, 16, 25, 26w              | 11, 15, 26                           |
| 14       | 6.29, dd (15.1, 10.8)                        | 126.4               | 13, 15                              | 15, 16, 26, 27                       | 12, 13, 16                           |
| 15       | 5.80, dd (15.1, 8.4)                         | 137.8               | 14, 16                              | 13, 14, 16, 17w, 27                  | 12, 13, 14, 10w, 17w, 27w            |
| 16       | 2.38, m                                      | 41.5                | 15, 17, 27                          | 14, 15w, 17, 18, 27                  | 14, 15, 17, 18                       |
| 17       | 3.43, m                                      | 72.8                | 16, 17OH, 18                        | 15, 16, 17OH, 18, 19, 27             | 15, 18, 19                           |
| 17OH     | 1.67, m                                      |                     | 17                                  | 3, 3OH, 24                           |                                      |
| 18       | 2.57, dd (3.8, 2.3)                          | 59.6                | 17                                  | 15, 17, 20, 27, 28                   | 17                                   |
| 19       | 3.02, dd (8.2, 2.2)                          | 57.6                | 20                                  | 17, 17OH, 20, 28                     | 17w, 18w, 20, 21w, 23w               |
| 20       | 1.33, m                                      | 39.0                | 19, 28                              | 18, 21, 23                           | 19, 28                               |
| 21       | 3.15, m                                      | 83.7                | 20, 22', 22''                       | 22', 22'', 23                        | 19, 20, 22w, 23                      |
| 22'      | 1.63, m                                      | 23.8                | 21, 22'', 23                        | 20w, 22''                            | 20, 21, 23                           |
| 22''     | 1.40, dp (14.2, 7.3)                         |                     | 21, 22', 23                         | 22', 23                              | 20, 21, 23                           |
| 23       | 0.85, t (7.4)                                | 10.0                | 22', 22''                           | 20, 21, 22'w, 22''                   | 21, 22                               |
| 24       | 1.02, s                                      | 24.7                |                                     | 3, 3OH, 6OH, 7, 17OH                 | 5, 6, 7                              |
| 25       | 0.77, d (6.8)                                | 16.9                | 10                                  | 9, 10, 11, 26w                       | 9, 10, 11                            |
| 26       | 1.64, d (1.2)                                | 11.9                |                                     | 10, 14                               | 11, 12, 13                           |
| 27       | 1.12, d (7.0)                                | 17.3                | 16                                  | 14w, 15w, 16, 17                     | 15, 16, 17                           |
| 28       | 0.89, d (7.0)                                | 10.8                | 20                                  | 18, 19, 20, 21                       | 19, 20, 21                           |
| 29       |                                              | 169.3               |                                     |                                      |                                      |
| 30       | 1.68, s                                      | 20.4                |                                     |                                      | 29                                   |
| 31       | 3.24, s                                      | 57.7                |                                     | 22', 22'', 23                        | 21                                   |

<sup>a</sup> Position numbering is provided in Supporting Figure S9.

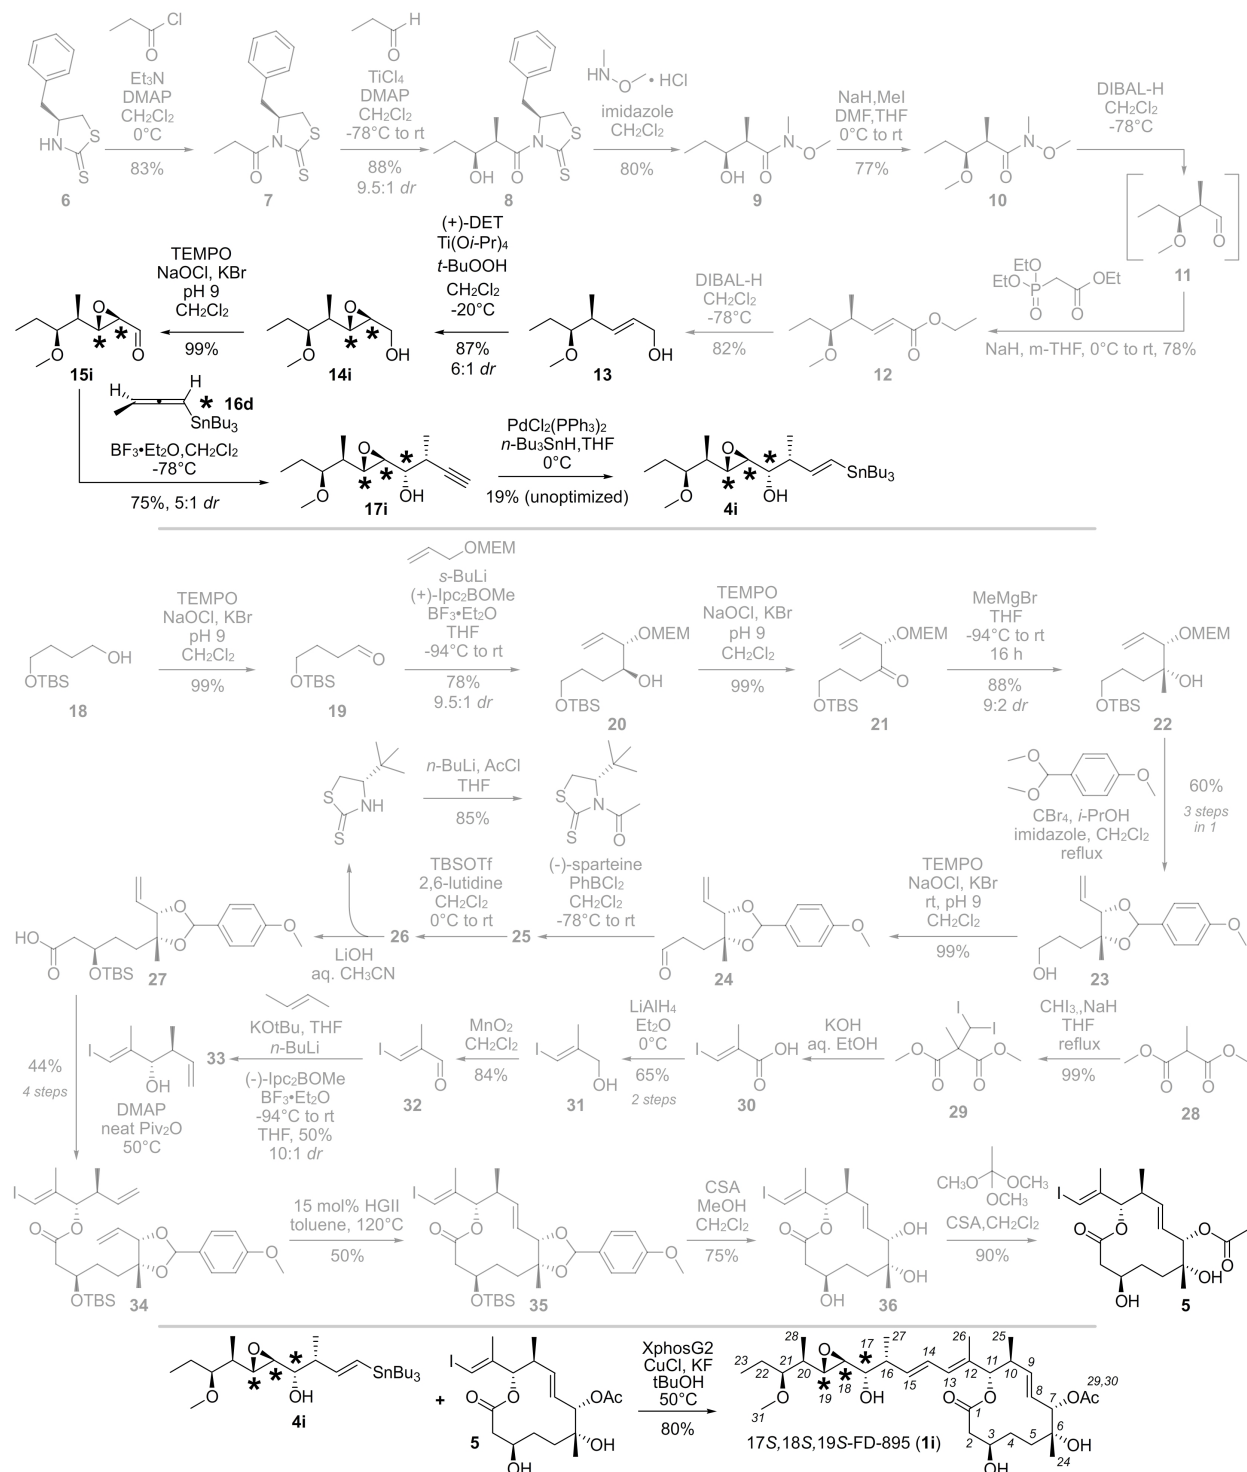

**Figure S10.** Synthesis of 17*S*,18*S*,19*S*-FD-895 (**1i**) from core **5** and side chain **4i**, prepared in 4 steps from **13**. The entire synthetic pathway is shown using the methods and materials prepared in Chan *et al.* 2020.<sup>25</sup> In this publication, a central route was developed to enable preparation of analogues of FD-895 (**1**), these steps are shown in grey. Steps used specifically to prepare **1i** are shown in black. Experimental procedures are provided for these (black) steps.

**Table S10.** NMR data for 17S,18S,19S-FD-895 (**1i**) in C<sub>6</sub>D<sub>6</sub>

| Position | $\delta_{\text{H}}$ , mult ( <i>J</i> in Hz) | $\delta_{\text{C}}$ | <sup>1</sup> H, <sup>1</sup> H-COSY | <sup>1</sup> H, <sup>1</sup> H-NOESY | <sup>1</sup> H, <sup>13</sup> C-HMBC |
|----------|----------------------------------------------|---------------------|-------------------------------------|--------------------------------------|--------------------------------------|
| 1        |                                              | 172.1               |                                     |                                      |                                      |
| 2'       | 2.31, dd (14.8, 3.8)                         | 38.5                | 2', 3                               | 3w                                   | 1, 3, 4                              |
| 2''      | 2.22, dd (14.8, 2.8)                         |                     | 2'', 3                              | 3w, 4'/5'                            | 1                                    |
| 3        | 3.52, m                                      | 69.3                | 2', 2'', 4'w, 4''                   | 2'', 4'/5'w, 5''                     |                                      |
| 3OH      |                                              |                     | 3                                   | 3, 24, 30                            |                                      |
| 4'       | 1.58, m                                      | 30.2                | 4'', 5', 5''                        | 2'', 5'', 24                         | 3w, 4w, 6, 24                        |
| 4''      | 1.33, m                                      |                     | 3, 4'                               | 4', 5'                               | 3, 5                                 |
| 5'       | 1.55, m                                      | 35.8                | 4'w, 4'', 5''                       | 2'', 4', 8w                          | 4, 6, 24w                            |
| 5''      | 1.27, m                                      |                     | 4'                                  | 7                                    | 4, 6, 7, 24w                         |
| 6        |                                              | 73.3                |                                     |                                      |                                      |
| 6OH      |                                              |                     |                                     | 3OH, 24                              |                                      |
| 7        | 5.25, d (10.6)                               | 79.2                | 8                                   | 4'/5', 5'', 8w, 9, 24                | 8, 9, 24, 29                         |
| 8        | 5.83, dd (15.2, 9.8)                         | 126.5               | 7, 9                                | 4'/5', 7, 9, 10                      | 6w, 10                               |
| 9        | 5.64, (15.2, 10.0)                           | 140.6               | 8, 10                               | 5'', 8, 10, 11, 25                   | 7, 10, 11w, 25w                      |
| 10       | 2.41, m                                      | 41.0                | 9, 11, 25                           | 7w, 8, 25, 26                        | 8, 9, 11, 25                         |
| 11       | 5.27, d (11.1)                               | 82.6                | 10                                  | 10, 13, 25                           | 1, 9, 10, 12/13, 25, 26              |
| 12       |                                              | 131.7               |                                     |                                      |                                      |
| 13       | 6.17, d (10.9)                               | 131.3               | 14, 26w                             | 11, 14, 15, 25                       | 11, 14, 15, 26                       |
| 14       | 6.32, dd (15.1, 10.8)                        | 126.1               | 13, 15                              | 13, 15, 16, 26, 27                   | 12, 13, 16                           |
| 15       | 5.75, dd (15.1, 8.2)                         | 138.4               | 14, 16                              | 13, 14, 16, 17w, 18w, 27             | 12, z13, 16, 17, 27                  |
| 16       | 2.44, m                                      | 41.8                | 15, 17, 27                          | 14, 15, 17, 27                       | 14, 15, 17, 18, 27                   |
| 17       | 3.48, dd (6.6, 3.6)                          | 72.6                | 16, 18                              | 15, 16, 18, 19w, 27                  | 15w, 16w, 19, 27w                    |
| 17OH     |                                              |                     |                                     |                                      |                                      |
| 18       | 2.78, dd (3.6, 2.3)                          | 59.2                | 17                                  | 15w, 16, 17, 20, 27, 28              | 17                                   |
| 19       | 3.01, dd (7.4, 2.2)                          | 57.3                | 20                                  | 17, 20, 28                           | 18w, 20, 28                          |
| 20       | 1.52, m                                      | 38.0                | 19, 28                              | 18, 19w, 21, 28                      | 19, 28                               |
| 21       | 2.83, dt (7.5, 4.6)                          | 84.7                | 20w, 22'                            | 20, 22', 22''w, 23, 28, 31           | 23, 31                               |
| 22'      | 1.49, m                                      | 23.5                | 21, 22'', 23                        | 21w, 23w                             | 20, 21, 23                           |
| 22''     | 1.38, m                                      |                     | 23                                  | 21w, 23w                             | 20w, 21w, 23                         |
| 23       | 0.83, t (7.4)                                | 10.6                | 22', 22''                           | 21, 22'w, 22''                       | 21, 22                               |
| 24       | 1.02, s                                      | 24.7                |                                     | 4'/5', 7                             | 5, 6, 7                              |
| 25       | 0.72, d (6.8)                                | 16.4                | 10                                  | 9, 10, 11, 26w                       | 9, 10, 11                            |
| 26       | 1.61, d (1.3)                                | 11.8                | 13                                  | 10, 11w, 14                          | 11, 12, 13, 15                       |
| 27       | 1.20, d (6.9)                                | 16.3                | 16                                  | 14, 15, 16, 17, 18w                  | 15, 16, 17                           |
| 28       | 1.02, d (6.9)                                | 12.4                | 20                                  | 20, 21                               | 19, 20, 21                           |
| 29       |                                              | 169.1               |                                     |                                      |                                      |
| 30       | 1.63, s                                      | 20.8                |                                     |                                      | 29                                   |
| 31       | 3.11, s                                      | 57.1                |                                     | 20, 21                               | 21                                   |

<sup>a</sup> Position numbering is provided in Supporting Figure S10.

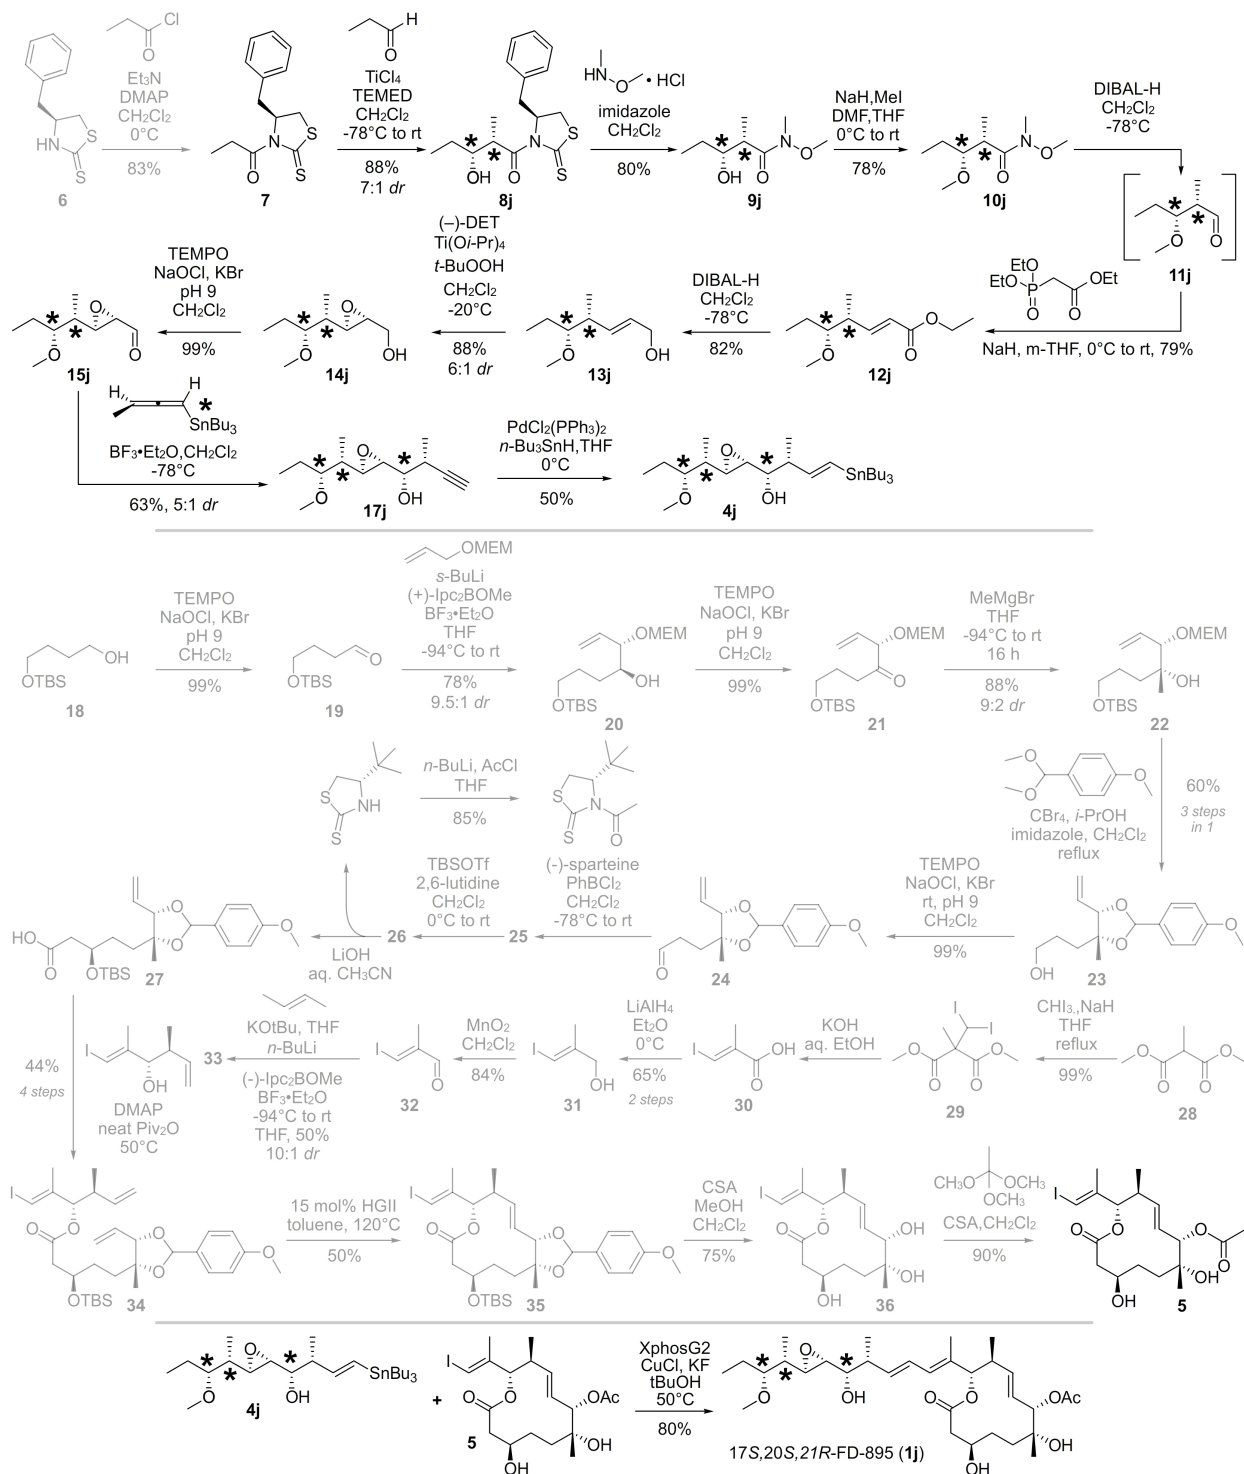

**Figure S11.** Synthesis of 17*S*,20*S*,21*S*-FD-895 (**1j**) from core **3** and side chain **2j**, prepared in 10 steps from **7**. The entire synthetic pathway is shown using the methods and materials prepared in Chan *et al.* 2020.<sup>25</sup> In this publication, a central route was developed to enable preparation of analogues of FD-895 (**1**), these steps are shown in grey. Steps used specifically to prepare **1j** are shown in black. Experimental procedures are provided for these (black) steps.

**Table S11. NMR data for 17S,20S,21S-FD-895 (1j) in C<sub>6</sub>D<sub>6</sub>**

| Position | $\delta_{\text{H}}$ , mult ( $J$ in Hz) | $\delta_{\text{C}}$ | $^1\text{H}$ , $^1\text{H}$ -COSY | $^1\text{H}$ , $^1\text{H}$ -NOESY | $^1\text{H}$ , $^{13}\text{C}$ -HMBC |
|----------|-----------------------------------------|---------------------|-----------------------------------|------------------------------------|--------------------------------------|
| 1        |                                         | 172.1               |                                   |                                    |                                      |
| 2'       | 2.29, dd (14.8, 3.8)                    | 38.2                | 3                                 | 3w                                 | 1, 3, 4                              |
| 2''      | 2.19, dd (14.8, 2.9)                    |                     | 3                                 | 3, 4'/5'                           | 1                                    |
| 3        | 3.50, m                                 | 69.0                | 3OH, 4''                          | 2', 4'/5', 5''                     |                                      |
| 3OH      | 3.62, bs                                |                     | 3w, 4''                           | 3                                  |                                      |
| 4'       | 1.56, m                                 | 30.0                | 3, 4'', 5'                        | 2'', 8w, 24                        | 3w, 6, 24w                           |
| 4''      | 1.25, m                                 |                     | 3, 4', 5''                        | 5', 7, 9, 24w                      | 5                                    |
| 5'       | 1.54, m                                 | 35.6                | 4', 4'', 5''                      | 2'', 4'', 8w                       | 3w, 4, 6, 24w                        |
| 5''      | 1.20, m                                 |                     | 4', 4'', 5'                       | 3, 4', 7, 24w                      | 4, 6w, 7w                            |
| 6        |                                         | 73.4                |                                   |                                    |                                      |
| 6OH      |                                         |                     |                                   |                                    |                                      |
| 7        | 5.24, d (6.6)                           | 78.9                | 8                                 | 4', 4'', 8w, 9, 24                 | 8, 9, 24w, 29                        |
| 8        | 5.82, dd (15.2, 12.3)                   | 126.2               | 7, 9                              | 4'/5', 7w, 9, 10                   | 6w, 10                               |
| 9        | 5.62, dd (15.2, 10.0)                   | 140.5               | 8, 10                             | 4'', 8, 10, 11, 25                 | 7, 10w, 25                           |
| 10       | 2.38, m                                 | 41.0                | 9, 11, 25                         | 8, 25, 26                          | 11w, 25                              |
| 11       | 5.26, d (7.5)                           | 82.4                | 10                                | 9, 10, 13, 25                      | 1, 12, 26                            |
| 12       |                                         | 131.4               |                                   |                                    |                                      |
| 13       | 6.17, d (10.8)                          | 131.4               | 14, 26                            | 10w, 11, 14, 15, 25, 26w           | 11, 14, 15, 26                       |
| 14       | 6.32, dd (15.2, 10.8)                   | 126.2               | 13, 15                            | 13, 15, 16, 26, 27                 | 13, 16                               |
| 15       | 5.83, dd (15.2, 10.4)                   | 137.9               | 14, 16                            | 13, 14, 16, 17w, 18w, 27           | 13, 16, 27w                          |
| 16       | 2.44, tq (6.6, 6.3)                     | 41.4                | 15, 17, 27                        | 17w, 27                            | 14, 15, 17, 18w, 27                  |
| 17       | 3.36, t (4.9)                           | 73.4                | 16, 18                            | 15w, 16, 18, 19, 27                | 15w, 18                              |
| 17OH     |                                         |                     |                                   |                                    |                                      |
| 18       | 2.74, dd (4.5, 2.3)                     | 58.6                | 17, 19                            | 16, 17, 20, 27, 28                 | 17                                   |
| 19       | 2.95, dd (7.0, 2.3)                     | 57.4                | 18, 20                            | 17, 20, 28                         | 20                                   |
| 20       | 1.55, m                                 | 37.8                | 19, 21, 28                        | 18, 21, 28                         | 19                                   |
| 21       | 2.84, dt (7.4, 4.7)                     | 84.4                | 20, 22', 22''                     | 20, 22', 22'', 23, 28, 31          | 19                                   |
| 22'      | 1.52, m                                 | 23.4                | 20, 21, 23                        | 23w                                | 23                                   |
| 22''     | 1.38, m                                 |                     | 20, 21, 23                        | 20, 21w, 28                        | 23                                   |
| 23       | 0.85, t (7.4)                           | 10.2                | 22', 22''                         | 21w, 22', 22''                     | 21, 22                               |
| 24       | 1.00, s                                 | 24.5                |                                   | 4'/5', 7                           | 5, 6, 7                              |
| 25       | 0.70, d (6.7)                           | 16.2                | 10                                | 9, 10, 11, 13w                     | 9, 10, 11                            |
| 26       | 1.58, d (1.2)                           | 11.6                | 13                                | 10, 11, 14, 15, 25                 | 11, 12, 13                           |
| 27       | 1.14, d (6.9)                           | 16.3                | 16                                | 14, 15, 16, 17, 18w                | 15, 16, 17                           |
| 28       | 1.02, d (7.5)                           | 12.0                | 20                                | 18w, 20, 21w                       | 19, 20, 21                           |
| 29       |                                         | 169.0               |                                   |                                    |                                      |
| 30       | 1.61, s                                 | 20.4                |                                   |                                    | 29                                   |
| 31       | 3.11, s                                 | 56.9                |                                   | 20w, 21                            | 21                                   |

<sup>a</sup> Position numbering is provided in Supporting Figure S11.

**Table S12. GI<sub>50</sub> values for 1 and analogues 1a-1j.<sup>a</sup>**

| Compound                                                     | GI <sub>50</sub> value (nM) | 95% confidence interval |
|--------------------------------------------------------------|-----------------------------|-------------------------|
| FD-895 ( <b>1</b> )                                          | 1.92                        | 1.00 to 2.83            |
| 3 <i>S</i> -FD-895 ( <b>1a</b> )                             | 2.75                        | 1.45 to 4.04            |
| 7 <i>R</i> -FD-895 ( <b>1b</b> )                             | 588.2                       | 176.9 to 999.4          |
| 10 <i>R</i> ,11 <i>R</i> -FD-895 ( <b>1c</b> )               | 41300                       | 26500 to 56100          |
| 17 <i>S</i> -FD-895 ( <b>1d</b> )                            | 2.17                        | 1.47 to 2.86            |
| 17- <i>O</i> -Me-FD-895 ( <b>1e</b> )                        | 2.64                        | 1.10 to 4.18            |
| 17 <i>S</i> - <i>O</i> -Me-17 <i>S</i> -FD-895 ( <b>1f</b> ) | 40.5                        | 25.8 to 55.2            |
| 3 <i>S</i> ,17 <i>S</i> -FD-895 ( <b>1g</b> )                | 142.9                       | 86.7 to 199.0           |
| 7 <i>R</i> ,17 <i>S</i> -FD-895 ( <b>1h</b> )                | 858.5                       | 553.9 to 1163.0         |
| 17 <i>S</i> ,18 <i>S</i> ,19 <i>S</i> -FD-895 ( <b>1i</b> )  | 470.2                       | 319.8 to 620.6          |
| 17 <i>S</i> ,20 <i>S</i> ,21 <i>S</i> -FD-895 ( <b>1j</b> )  | 285.2                       | 178.6 to 391.8          |

<sup>a</sup> HCT-116 cells were treated with **1a** or analogues **1a-1e** ranging from 0.1 to 5000 nM for 72 h, then cell viability was measured by Cell Titer MTS Assay (see Methods).

**Table S13. Sequences of the qPCR primers used in this study.**

| <b>qPCR primers</b>                   |                           |
|---------------------------------------|---------------------------|
| <b>Primer</b>                         | <b>5' Sequence 3'</b>     |
| Aurora A FP                           | CCACCTTCGGCATCCTAATA      |
| Aurora A RP                           | TCCAAGTGGTGCATATTCCA      |
| PLK-1 FP                              | CTCAACACGCCTCATCCTC       |
| PLK-1 RP                              | GTGCTCGCTCATGTAATTGC      |
| Aurora B FP                           | GGAGAGCTTAAAATTGCAGATTTTG |
| Aurora B RP                           | TGCAGCTCTTCTGCAGCTCCT     |
| PHF5a FP                              | GTTGCCATCGGAAGACTGT       |
| PHF5a RP                              | GCCCCTGGTAAGATCCATAGT     |
| SF3A1 FP                              | GGTGTTCCCAGAGAGCAGTAG     |
| SF3A1 RP                              | GCTGGGGCCATGTCTGTTTT      |
| Aurora A exon 3- exon 4 FP            | AATTCTTCCCAGCGCATTC       |
| Aurora A exon 3- exon 4 RP            | TCCTCAGGATTATTTTCAGGTG    |
| Aurora A exon 3- exon 7 FP            | CTGCCATCGGCACCTGTATAT     |
| Aurora A exon 3- exon 7 RP            | GCATGTACTGACCACCCAAA      |
| SF3B1 FP                              | GGGCTACTGATTTGGGGAGA      |
| SF3B1 RP                              | CATGAACCATAGCCTGTCAGC     |
| MCL-1 long FP                         | GTGCCTTTGTGGCTAAACACT     |
| MCL-1 long RP                         | AGTCCCGTTTTGTCCTTACGA     |
| MCL-1 short FP                        | GGCCTTCCAAGGATGGGTTT      |
| MCL-1 short RP                        | ACTCCAGCAACACCTGCAAAA     |
| DNAJB1 FP                             | GGCCTGATGGGTCTTATCTATGG   |
| DNAJB1 RP                             | TTAGATGGAAGCTGGCTCAAGAG   |
| ASF/SF2 FP                            | GAGTTCGAGGACCCGCGAG       |
| ASF/SF2 RP                            | CGGCCGCTTCGAGGAAACTC      |
| Aurora A FP                           | CCACCTTCGGCATCCTAATA      |
| Aurora A RP                           | TCCAAGTGGTGCATATTCCA      |
| PLK-1 FP                              | CTCAACACGCCTCATCCTC       |
| PLK-1 RP                              | GTGCTCGCTCATGTAATTGC      |
| FP: forward primer; RP reverse primer |                           |

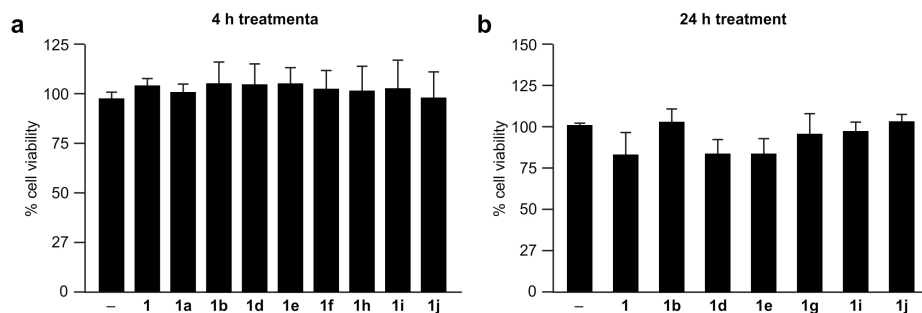

**Figure S12.** Cell viability studies conducted on treatments HCT-116 cells for **a)** 4 h at ~20 times the  $GI_{50}$  value (upper left, Fig. 4) or **b)** 24 h at 500 nM. Cells were stained and data was collected using the Cell Titer MTS Assay (see Methods).



$^1\text{H}$ -NMR (500 MHz) and  $^{13}\text{C}$ -NMR (125 MHz) spectra of FD-895 (1) in  $\text{C}_6\text{D}_6$

JLBL\_FD895\_Ph\_1Ha  
Std proton

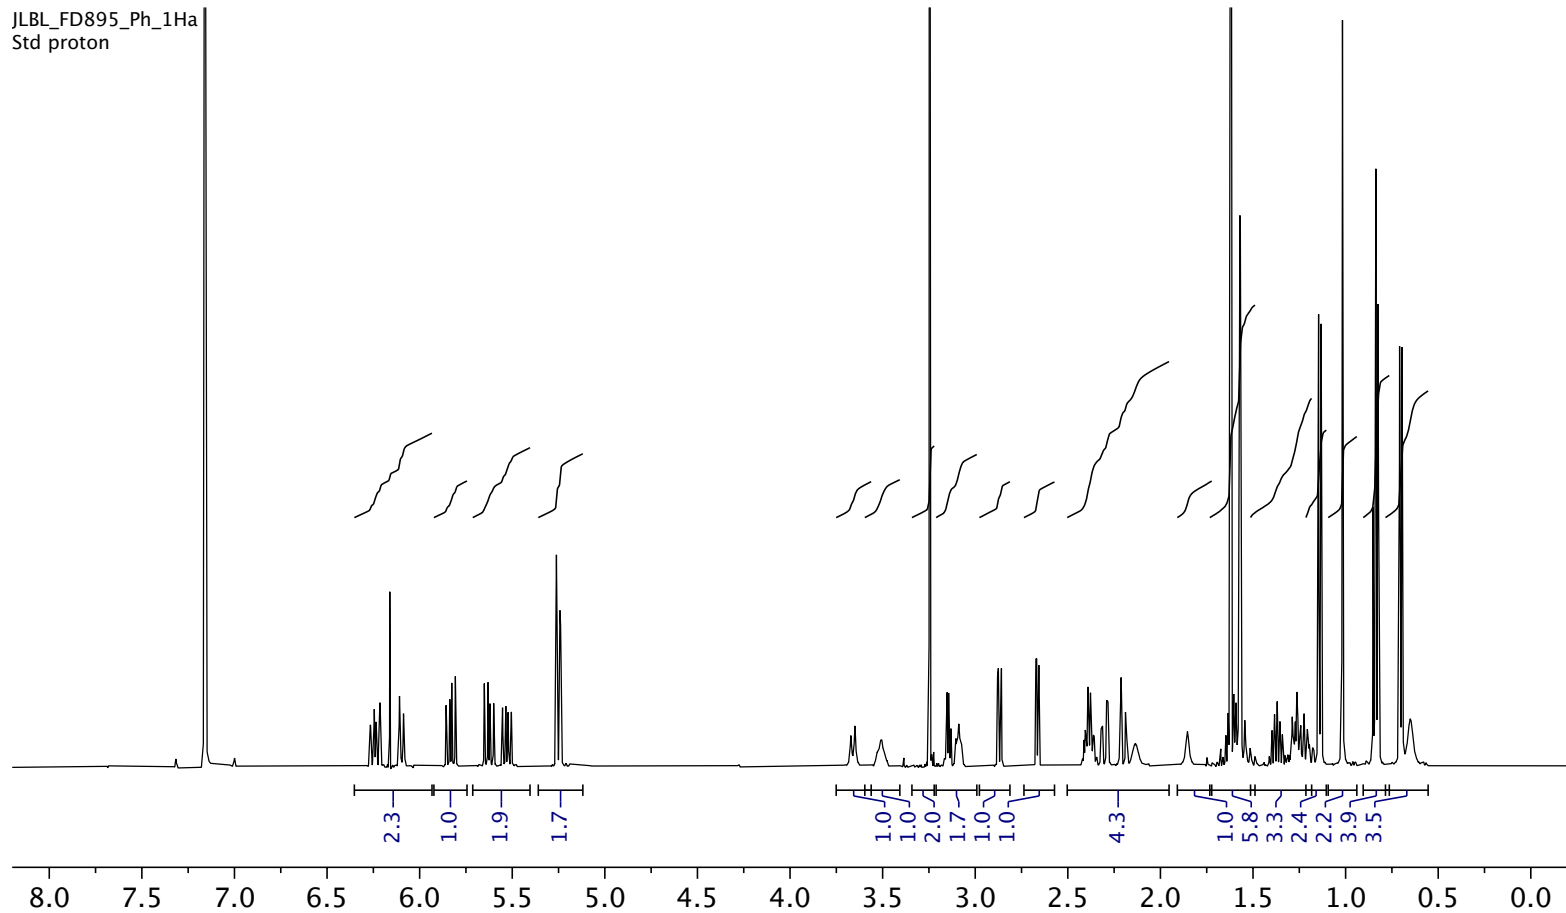

JLBL\_FD895\_Ph\_13Cc  
Std carbon

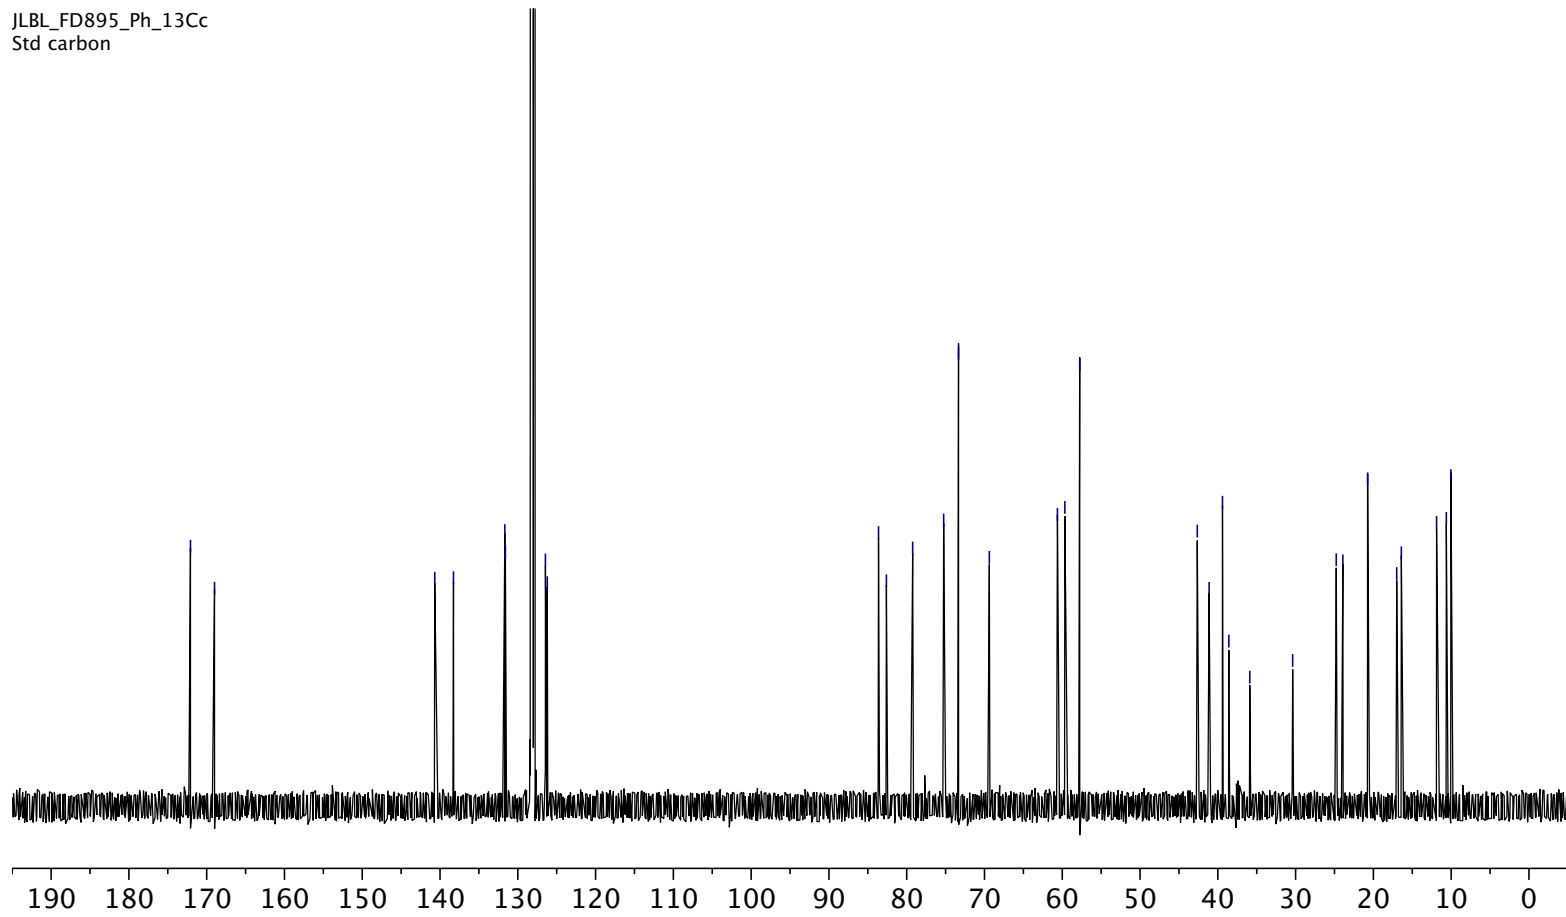

$^1\text{H}, ^1\text{H}$ -gCOSY (500 MHz) spectrum of FD-895 (1) in  $\text{C}_6\text{D}_6$

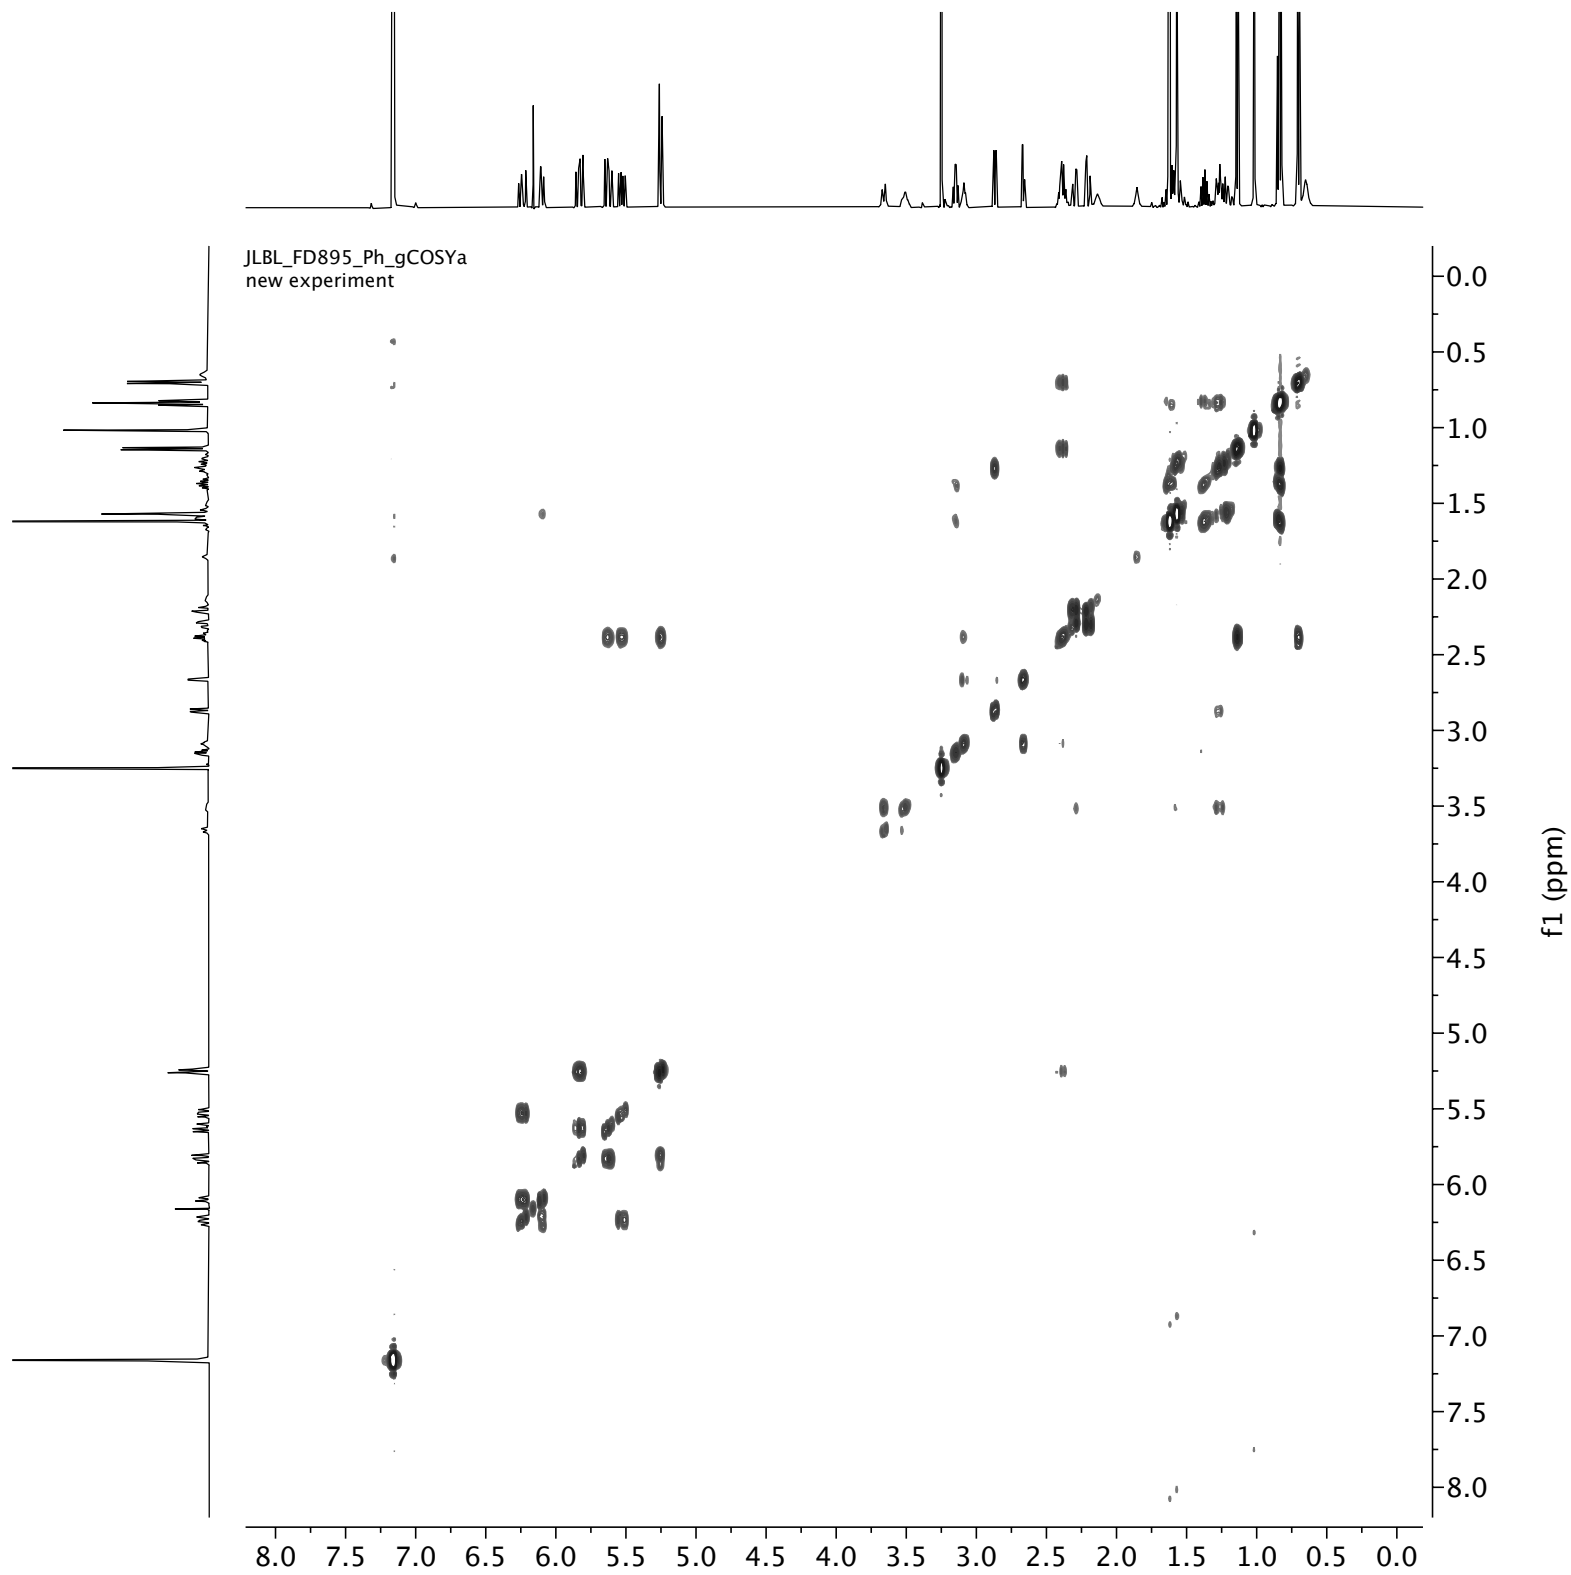

$^1\text{H}, ^1\text{H}$ -NOESY (500 MHz) spectrum of FD-895 (1) in  $\text{C}_6\text{D}_6$

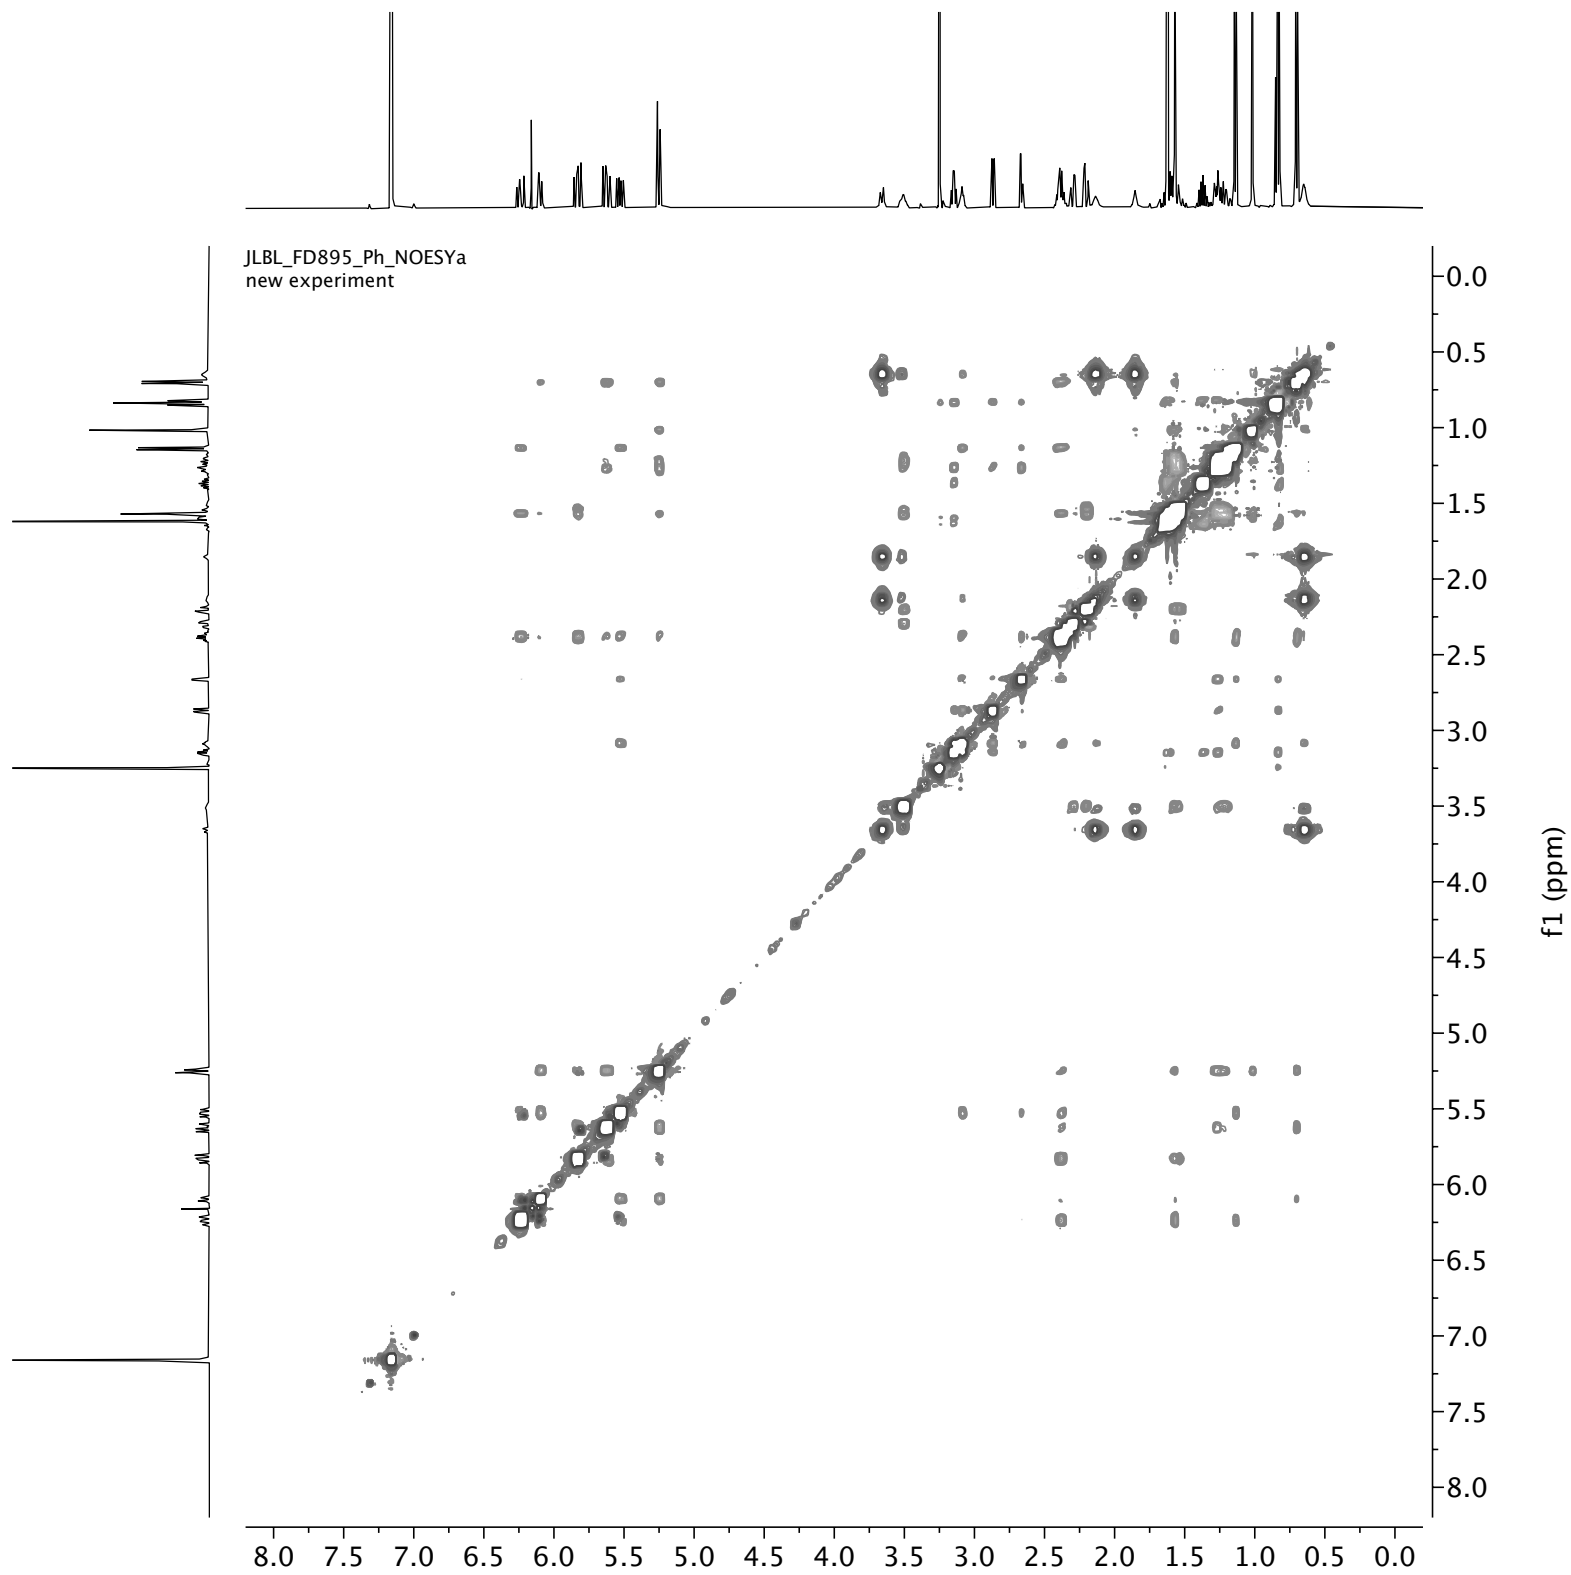

$^1\text{H}, ^{13}\text{C}$ -HSQC (500 MHz) spectrum of FD-895 (1) in  $\text{C}_6\text{D}_6$

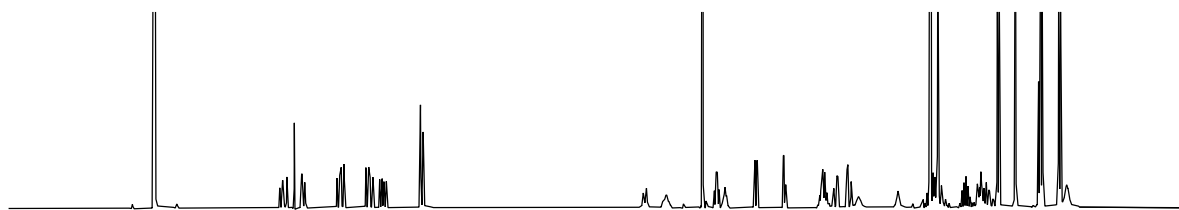

JLBL\_FD895\_Ph\_HSQCb  
Std proton

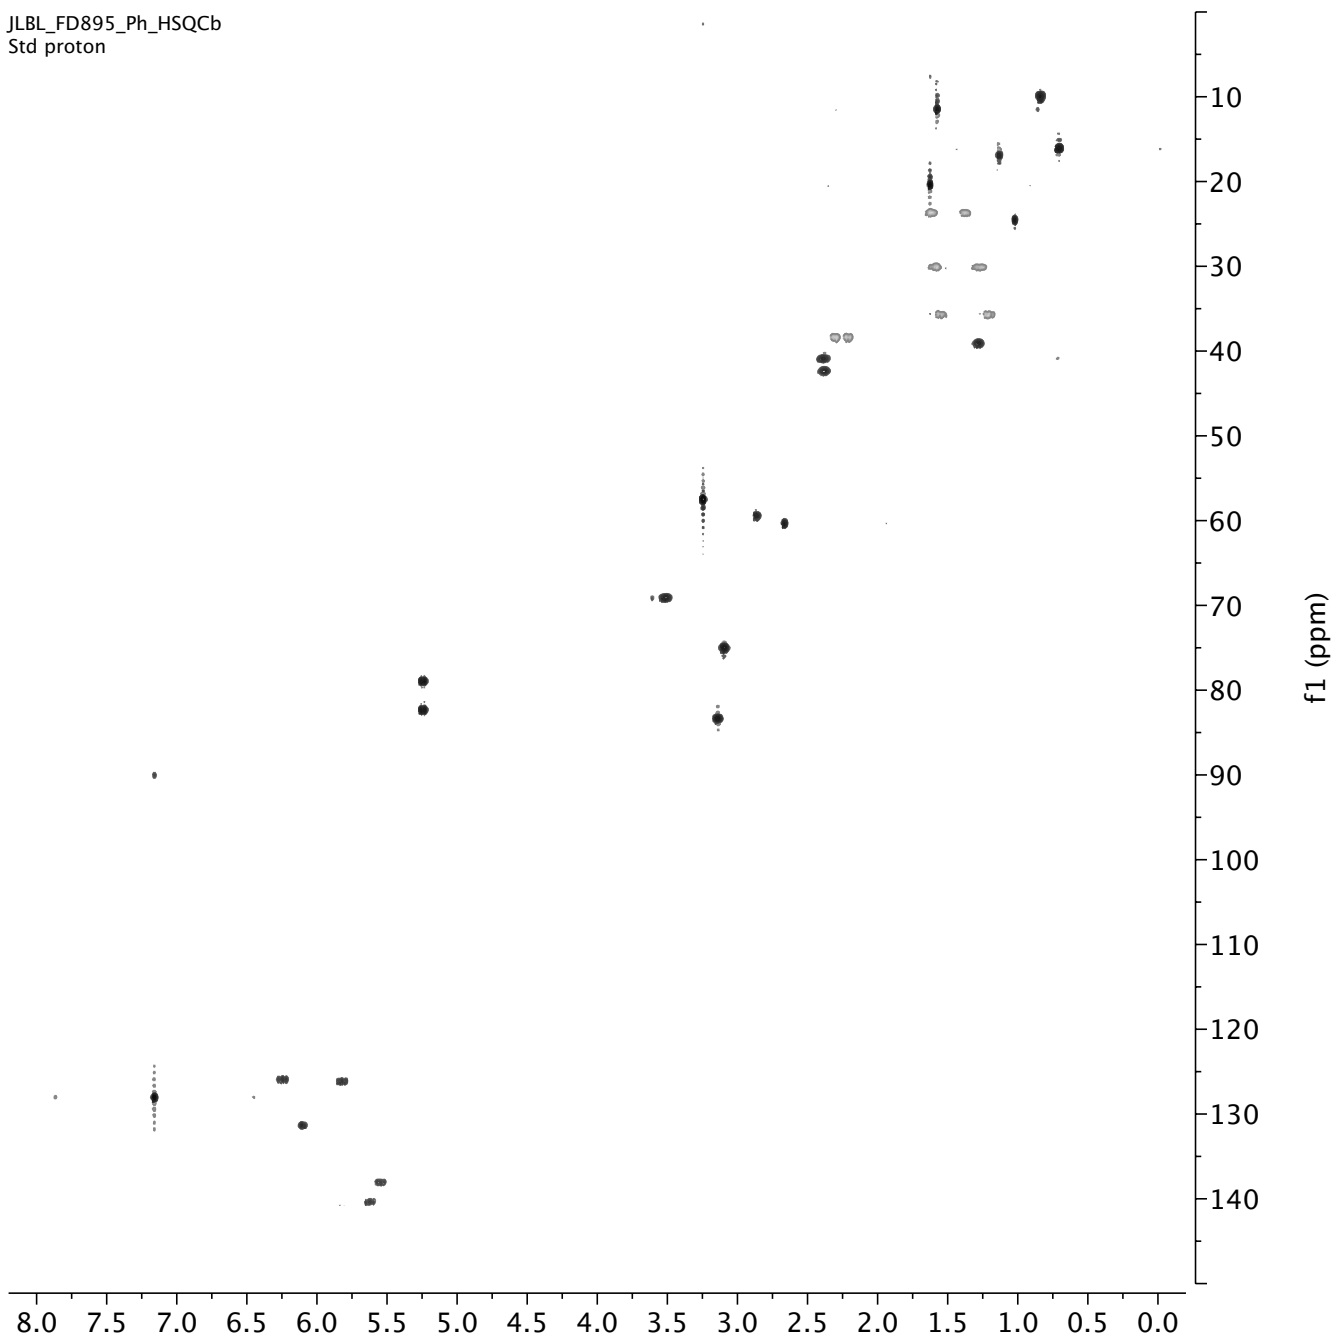

$^1\text{H}, ^{13}\text{C}$ -HMBC (500 MHz) spectrum of FD-895 (1) in  $\text{C}_6\text{D}_6$

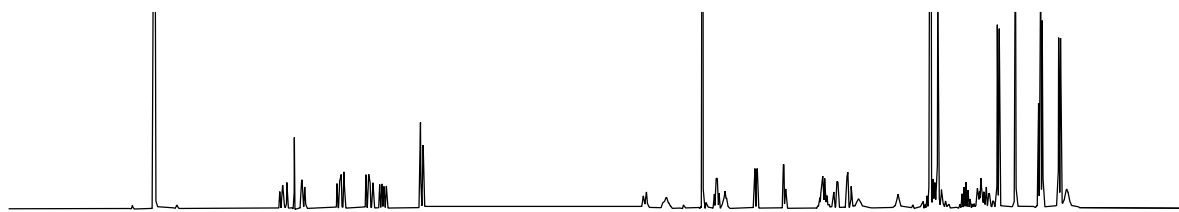

JLBL\_FD895\_Ph\_HMBCb  
Std proton

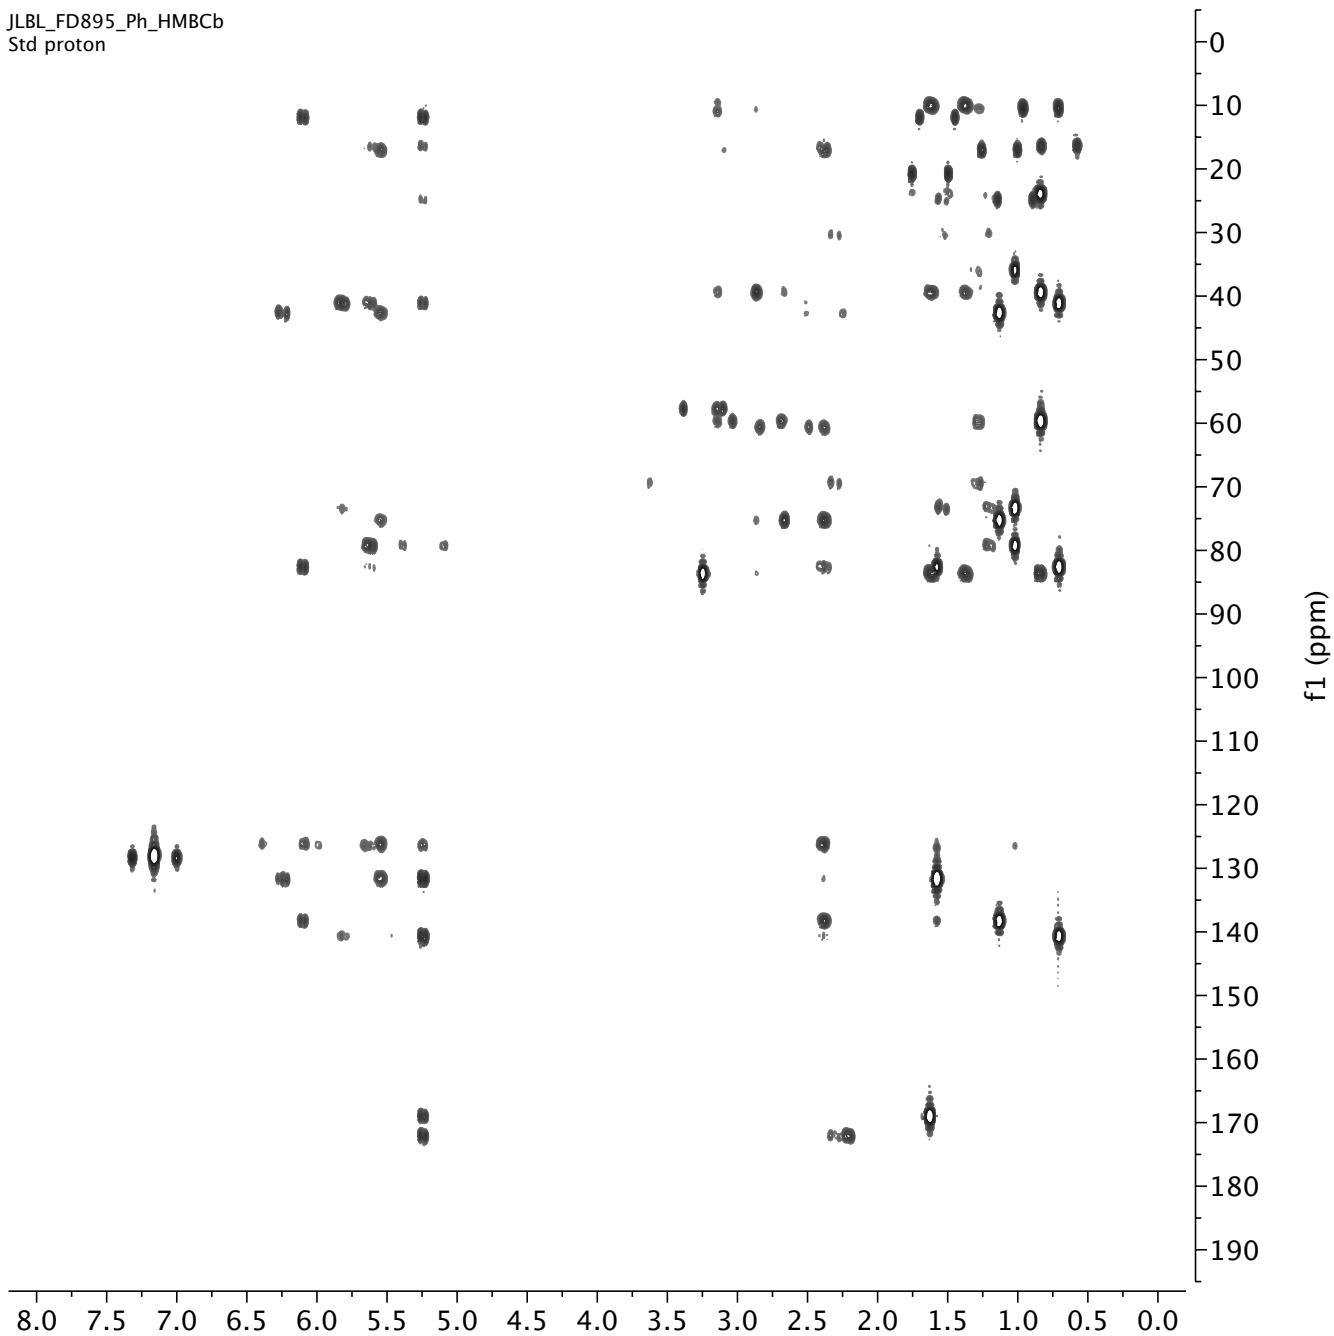

$^1\text{H}$ -NMR (600 MHz) and  $^{13}\text{C}$ -NMR (125 MHz) spectra of 3*S*-FD-895 (**1a**) in  $\text{C}_6\text{D}_6$

FD895\_J4\_C3.2.fid

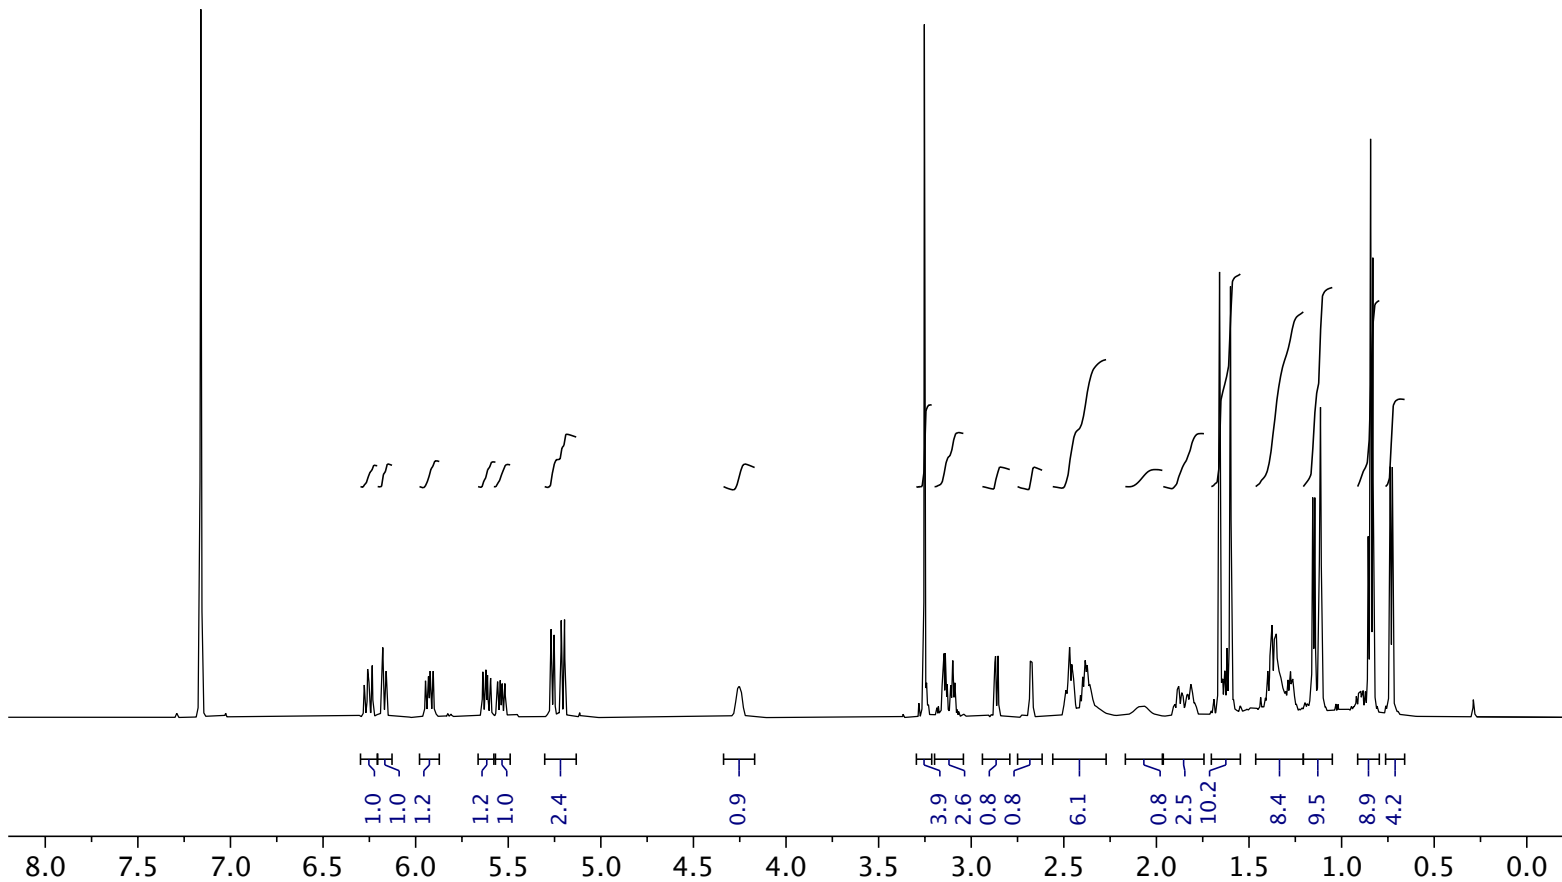

FD895\_C3isomer\_13Cb  
Std carbon

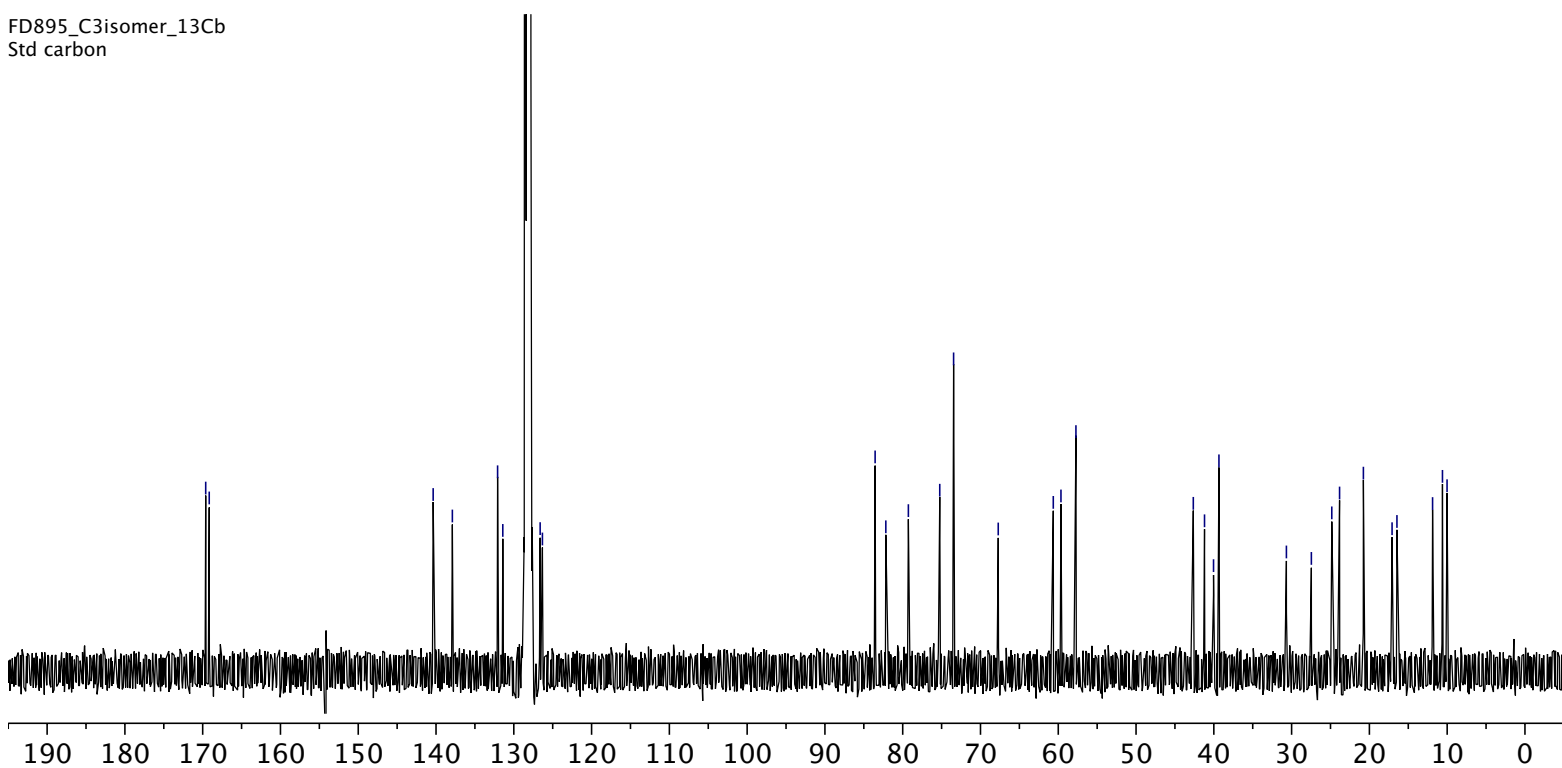

$^1\text{H}, ^1\text{H}$ -gCOSY (600 MHz) spectrum of 3*S*-FD-895 (**1a**) in  $\text{C}_6\text{D}_6$

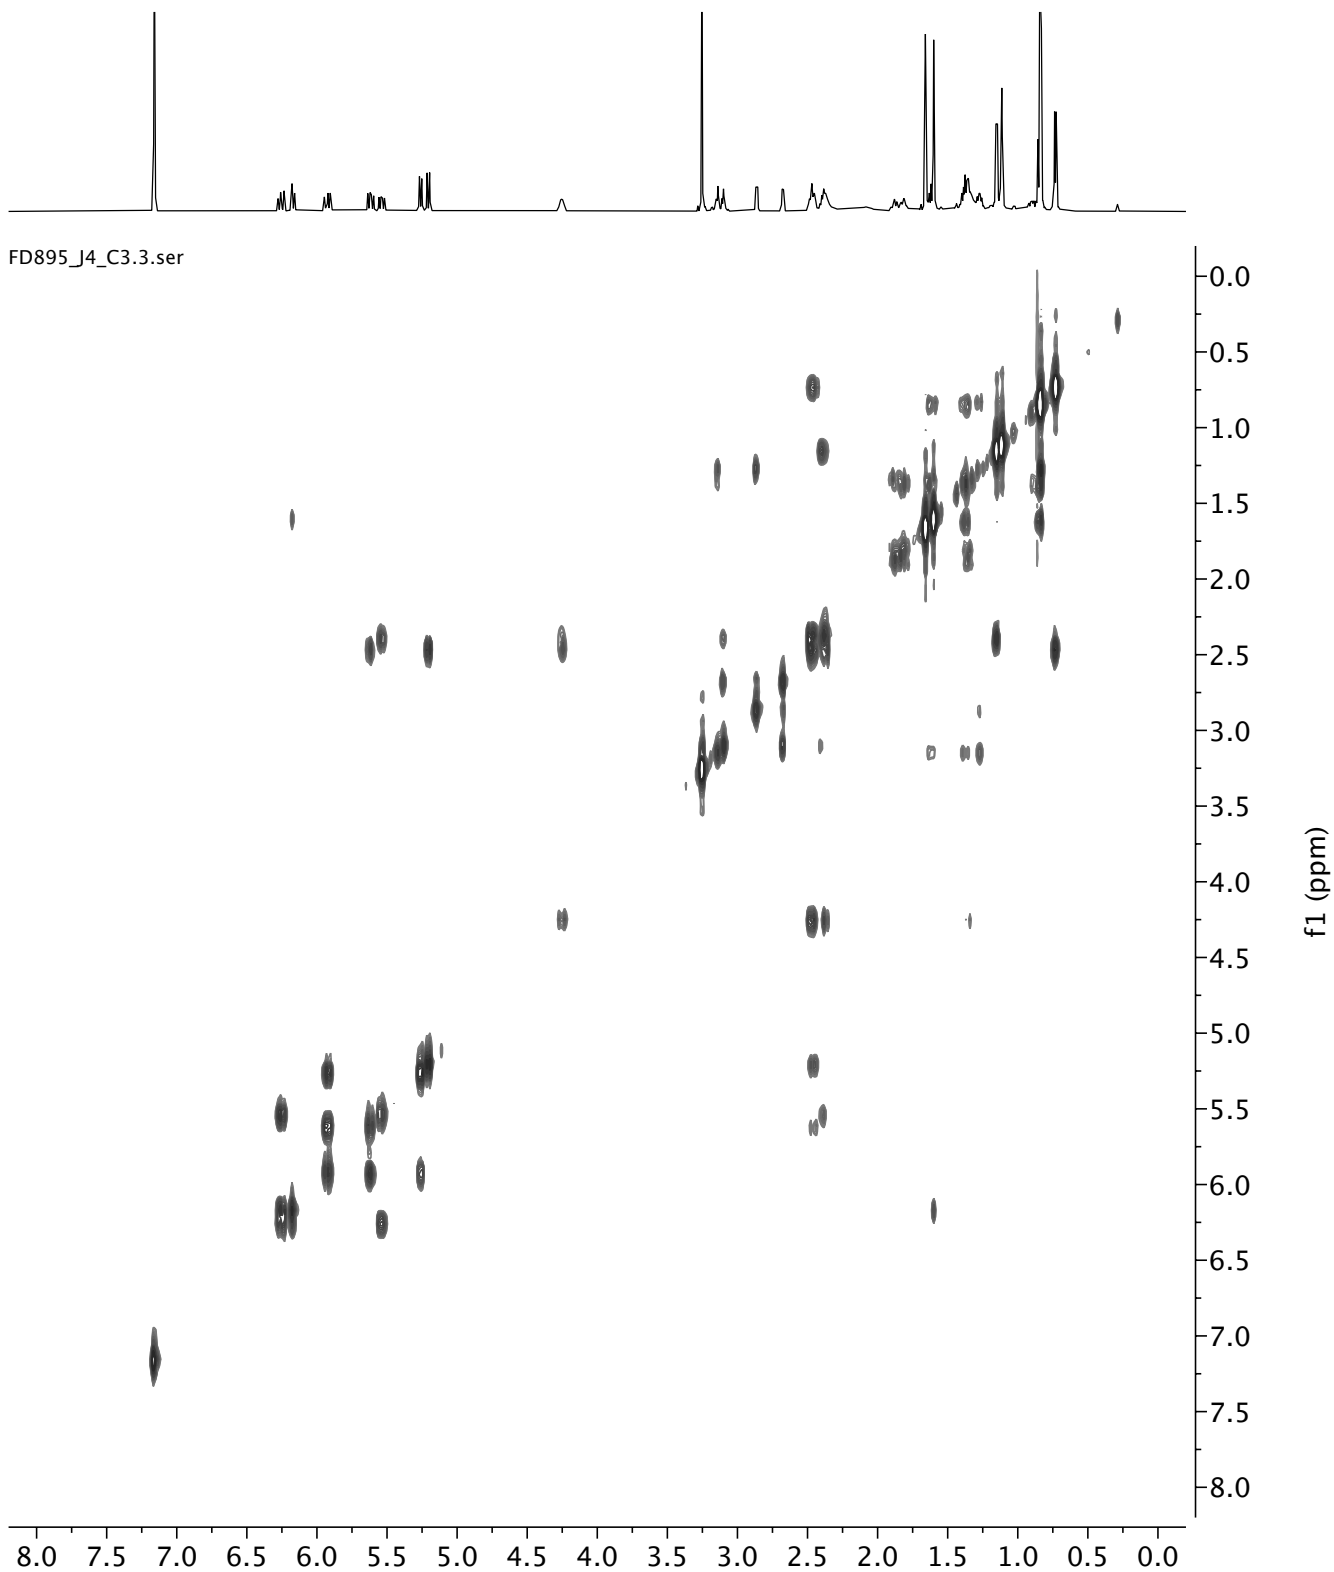

$^1\text{H}$ ,  $^1\text{H}$ -NOESY (600 MHz) spectrum of 3S-FD-895 (1a) in  $\text{C}_6\text{D}_6$

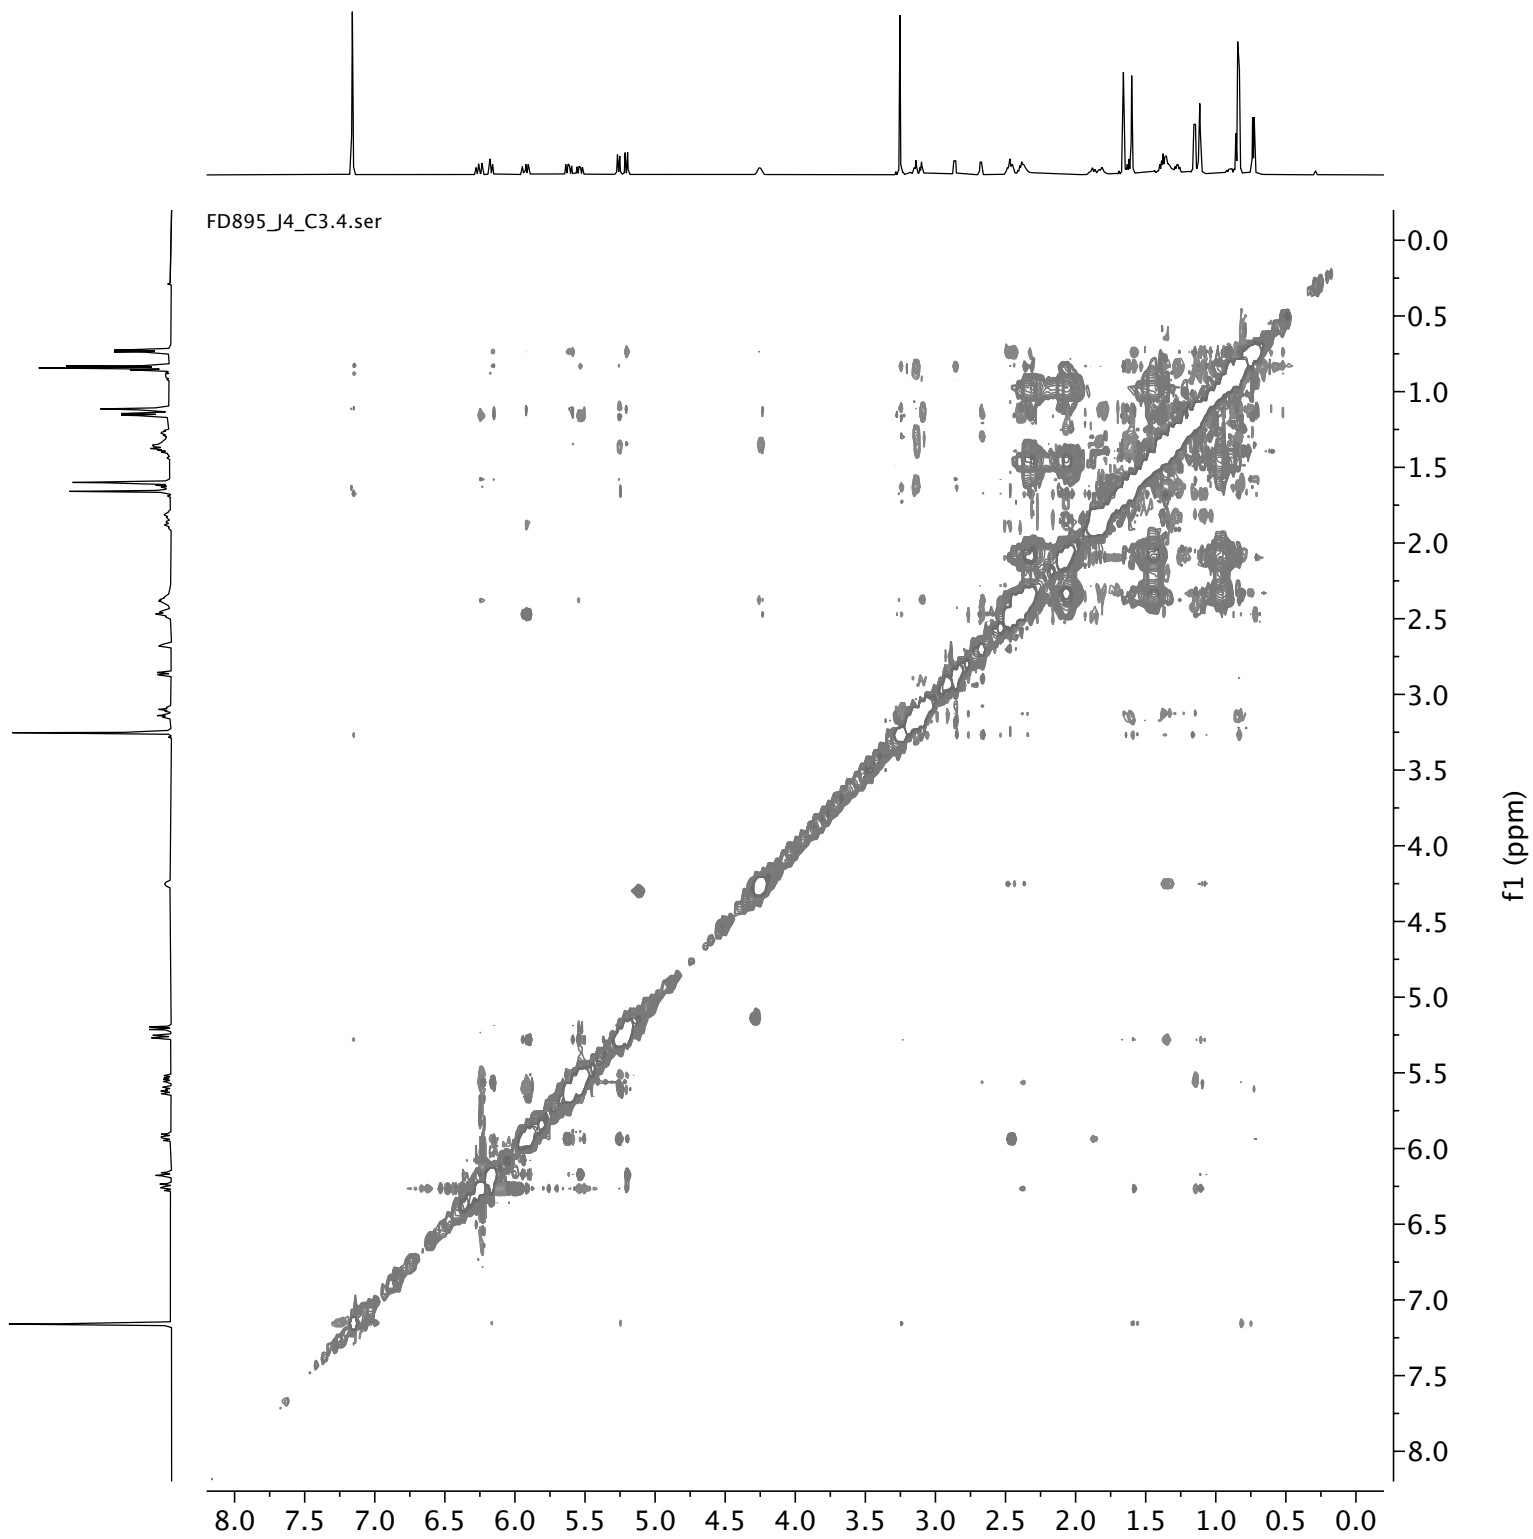



$^1\text{H}, ^{13}\text{C}$ -HSQC (600 MHz) spectrum of 3S-FD-895 (1a) in  $\text{C}_6\text{D}_6$

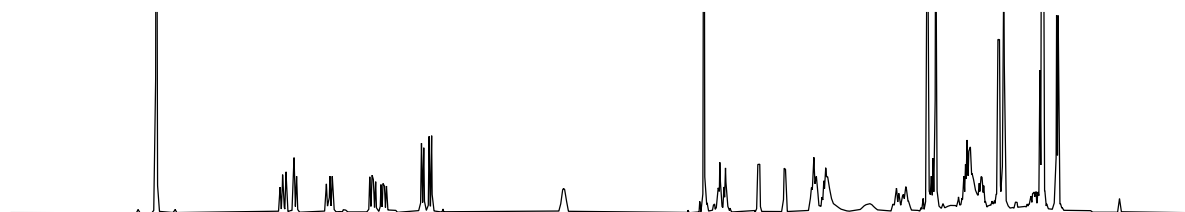

FD895\_J4\_C3.5.ser

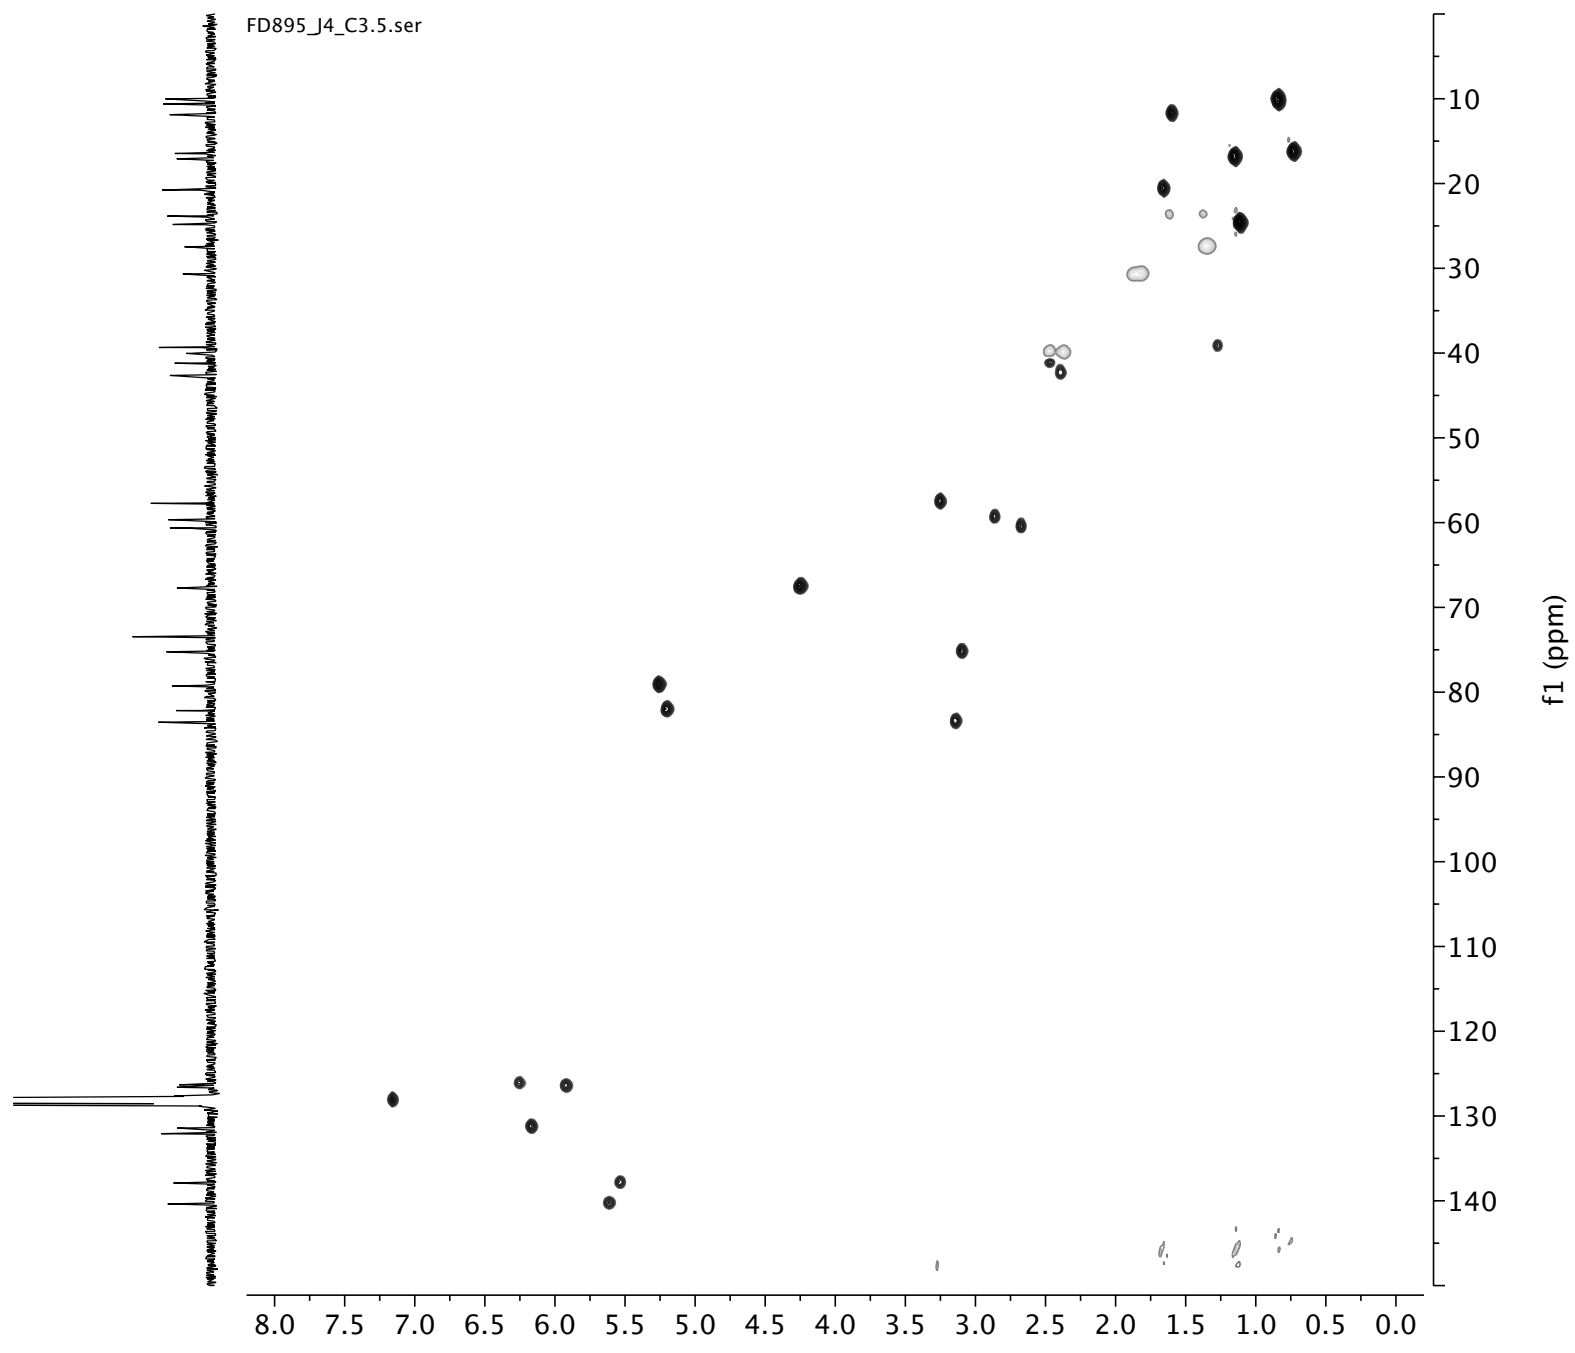

$^1\text{H}, ^{13}\text{C}$ -HMBC (500 MHz) spectrum of 3S-FD-895 (**1a**) in  $\text{C}_6\text{D}_6$

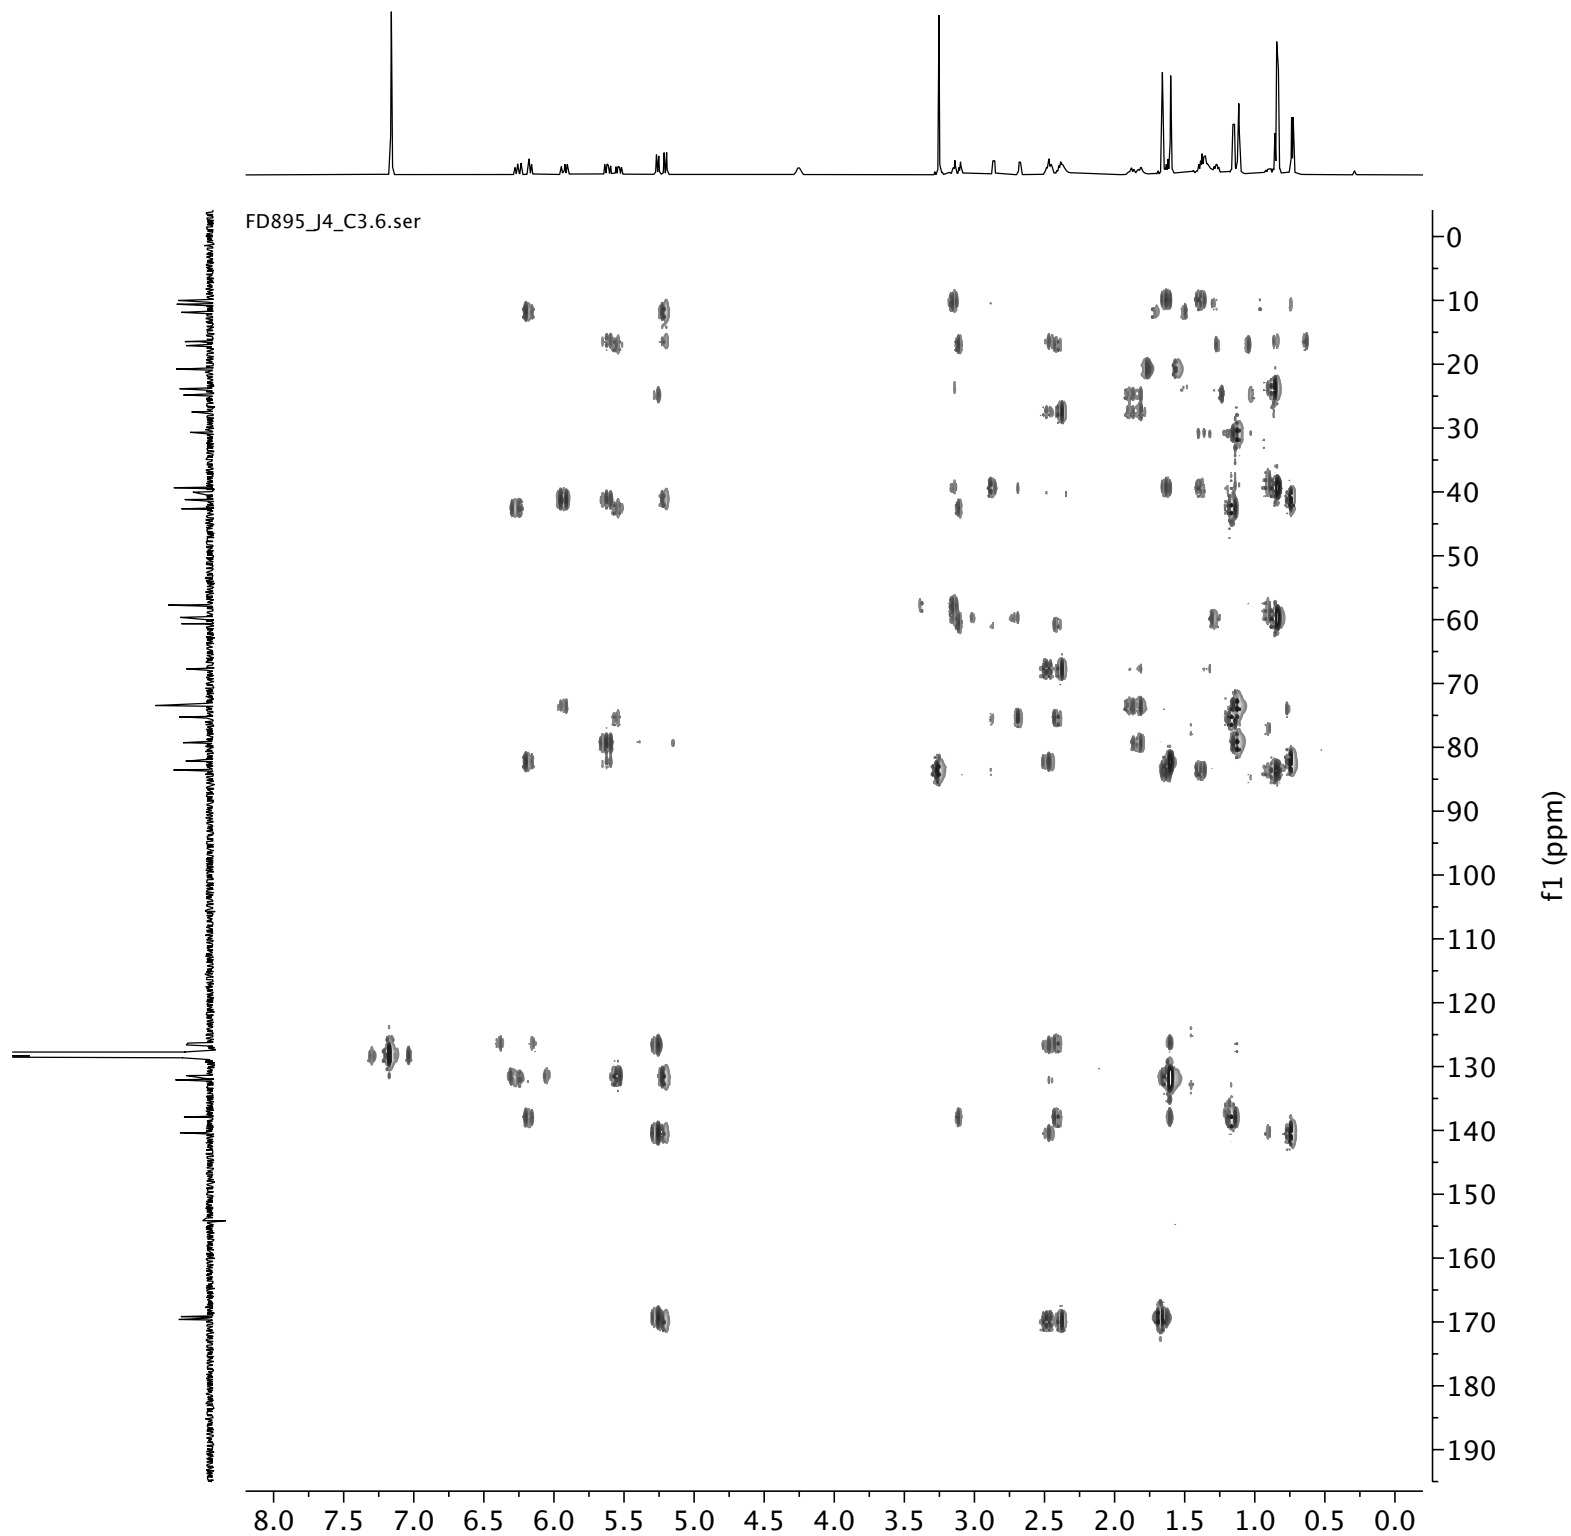

$^1\text{H}$ -NMR (600 MHz) and  $^{13}\text{C}$ -NMR (125 MHz) spectra of 7*R*-FD-895 (**1b**) in  $\text{C}_6\text{D}_6$

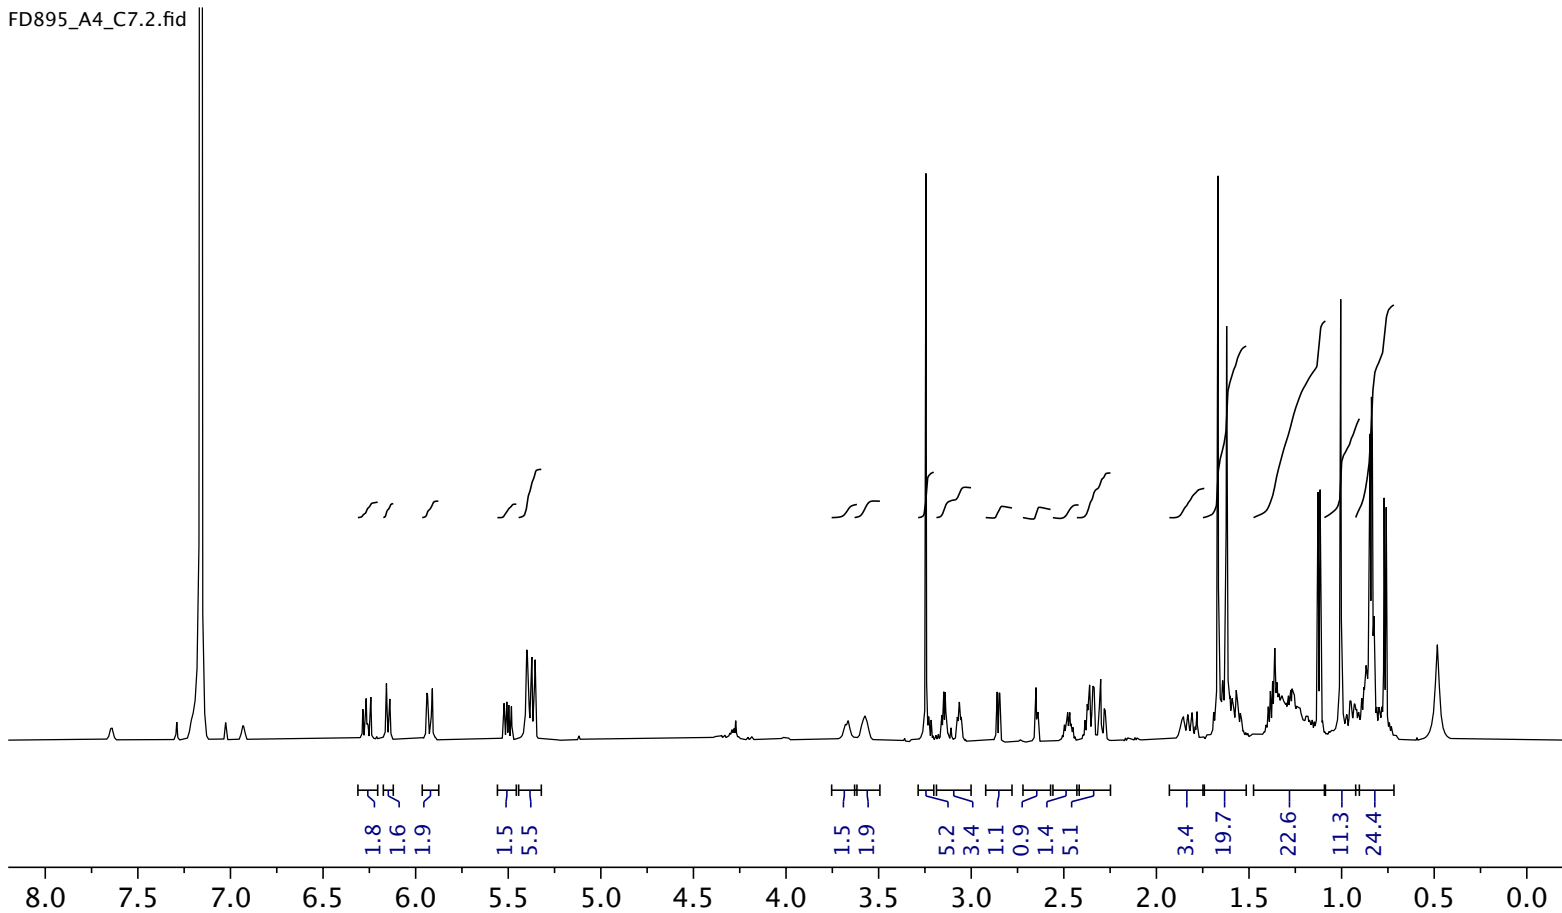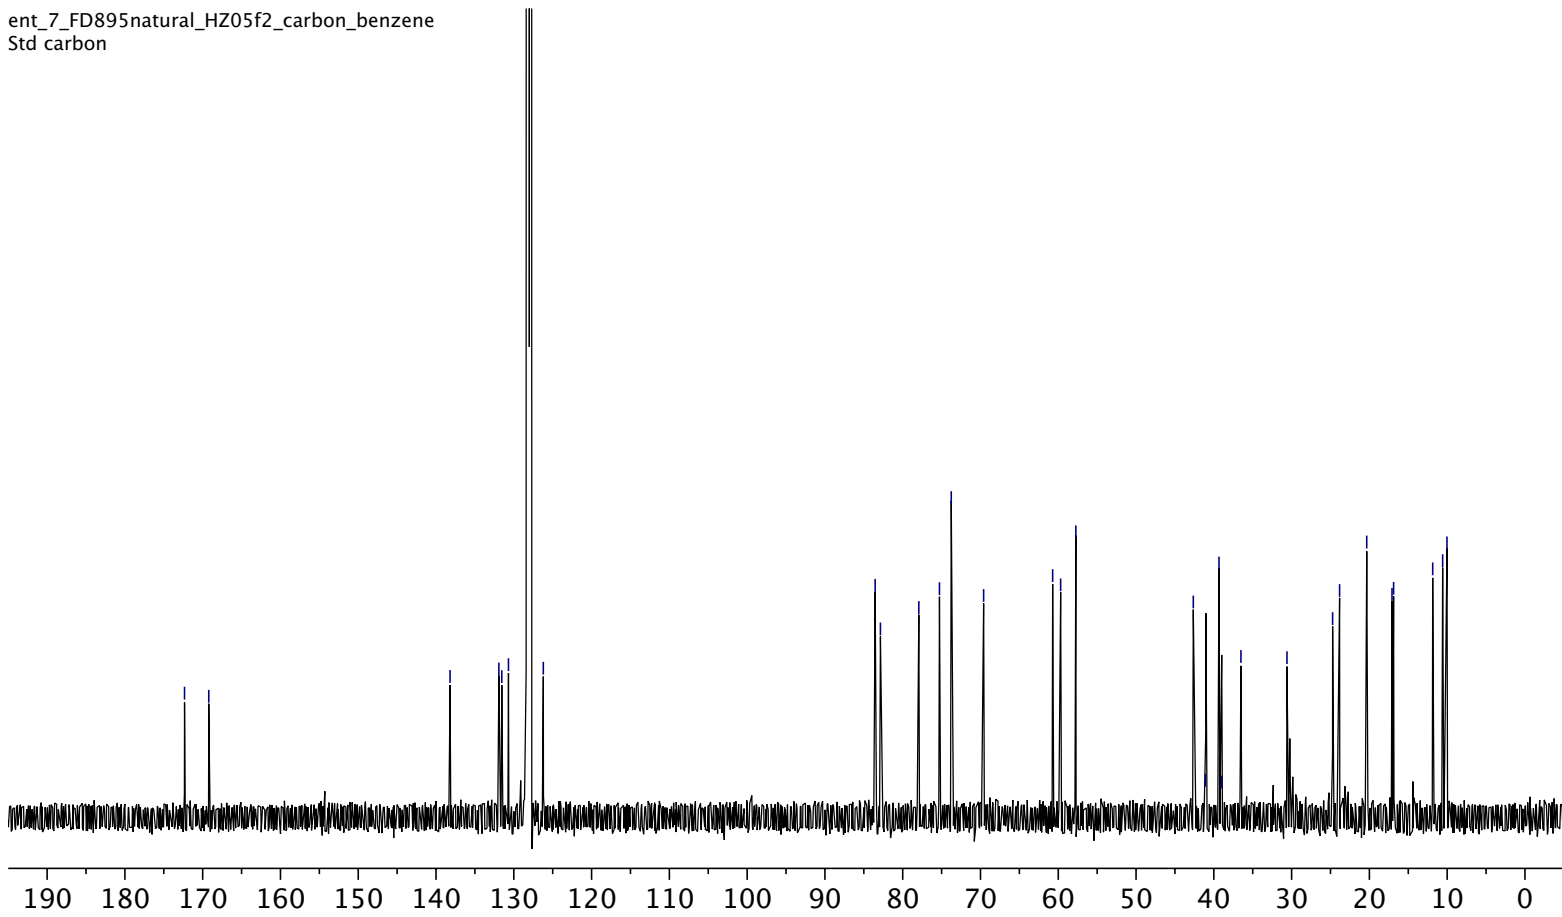

$^1\text{H}, ^1\text{H}$ -gCOSY (500 MHz) spectrum of 7*R*-FD-895 (**1b**) in  $\text{C}_6\text{D}_6$

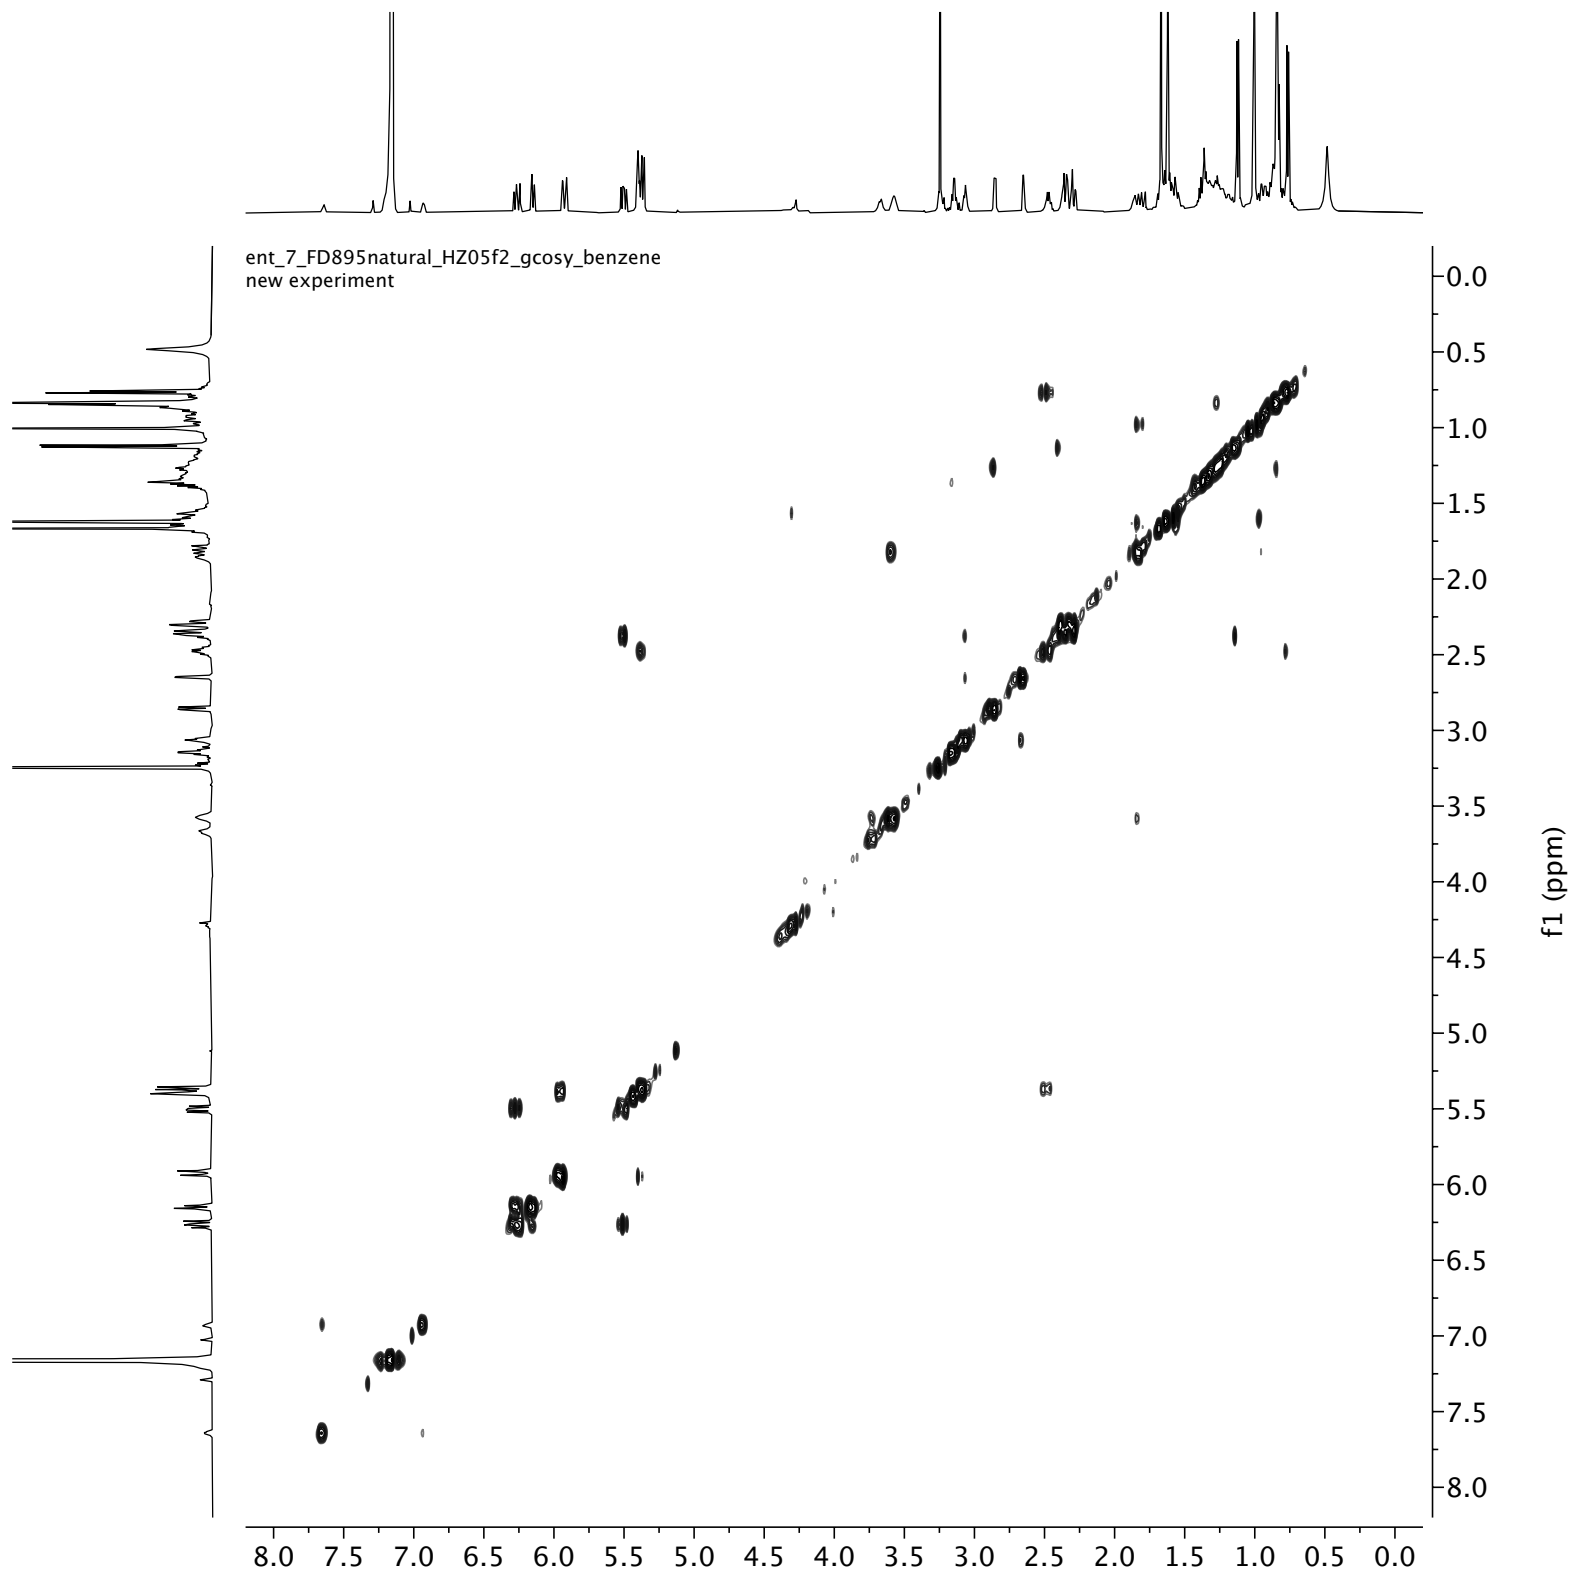

$^1\text{H}, ^1\text{H}$ -NOESY (600 MHz) spectrum of 7*R*-FD-895 (**1b**) in  $\text{C}_6\text{D}_6$

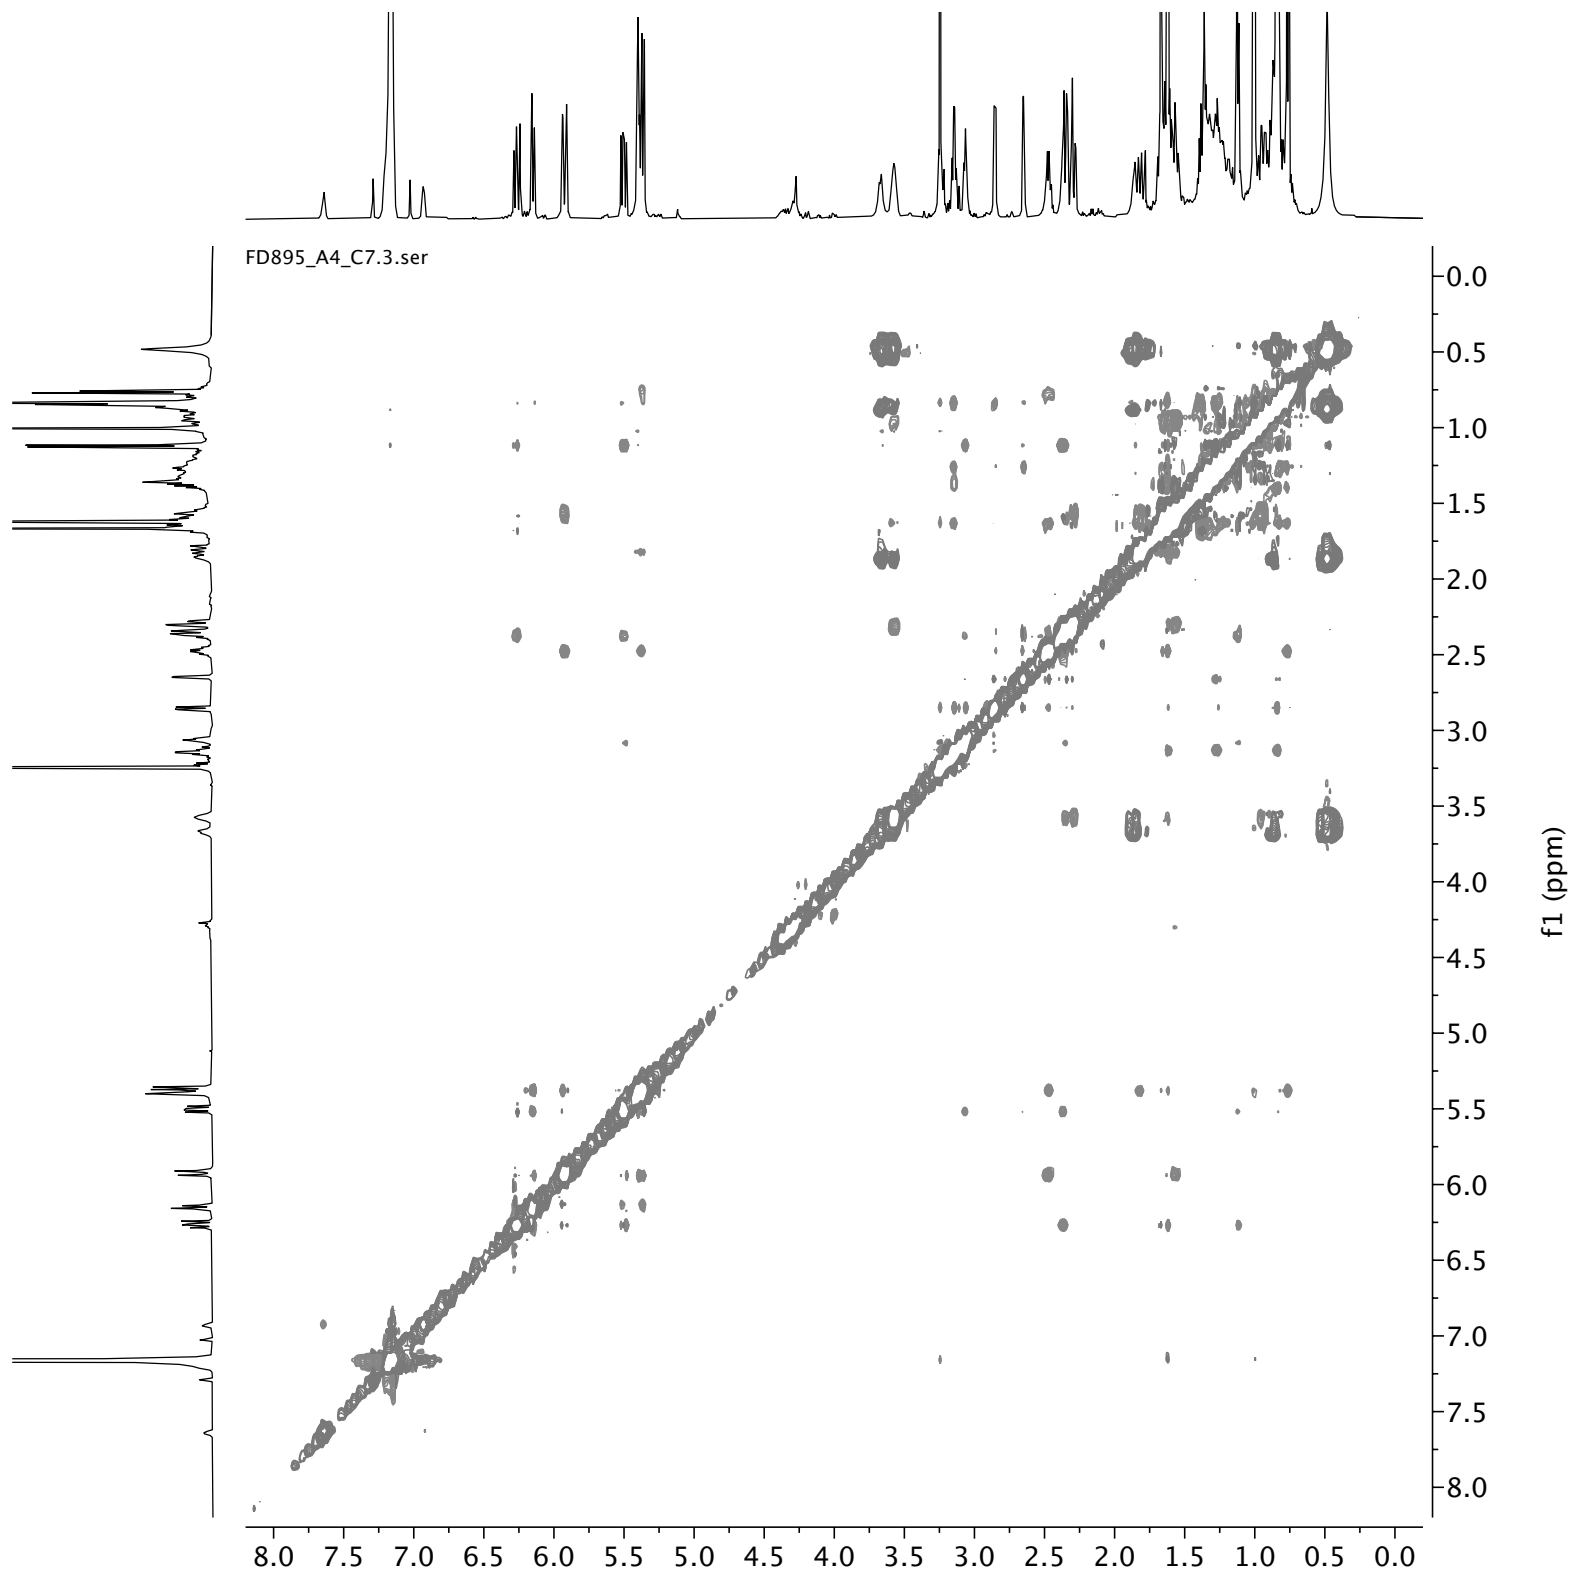

$^1\text{H}, ^{13}\text{C}$ -HSQC (600 MHz) spectrum of 7R-FD-895 (**1b**) in  $\text{C}_6\text{D}_6$

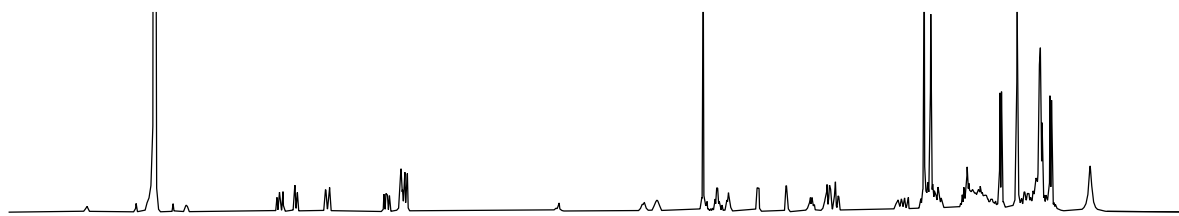

FD895\_A4\_C7.4.ser

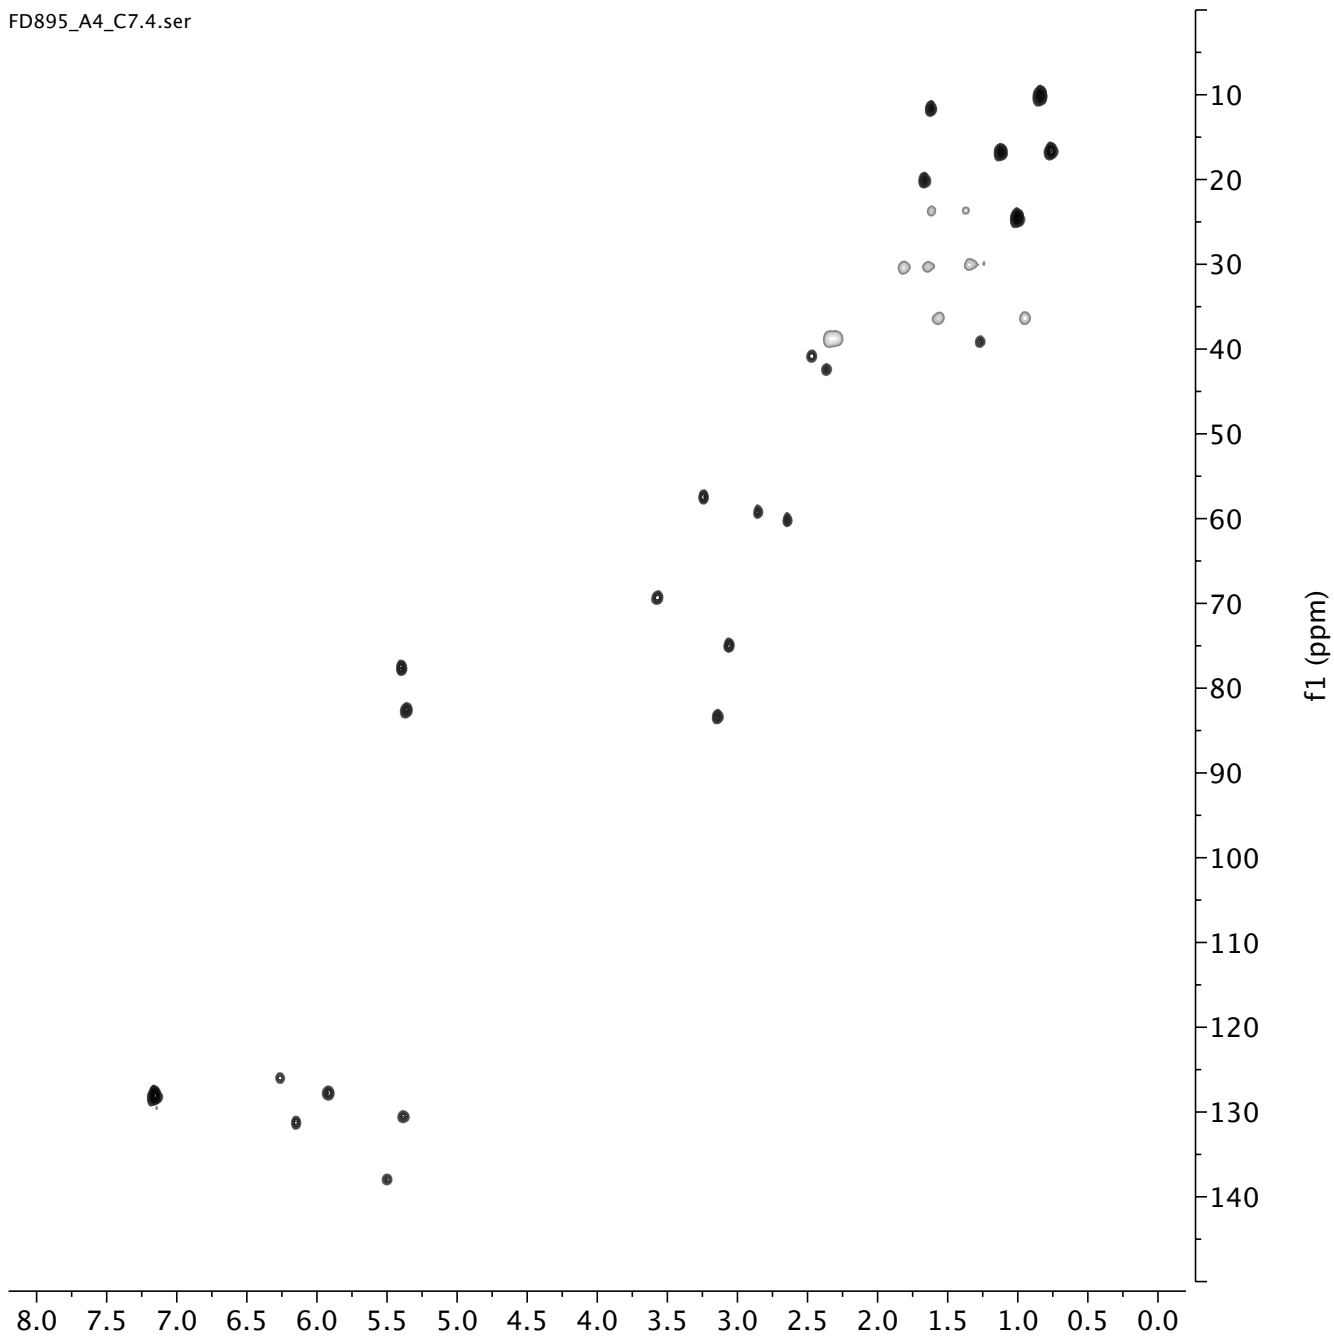

$^1\text{H}, ^{13}\text{C}$ -HMBC (500 MHz) spectrum of 7*R*-FD-895 (**1b**) in  $\text{C}_6\text{D}_6$

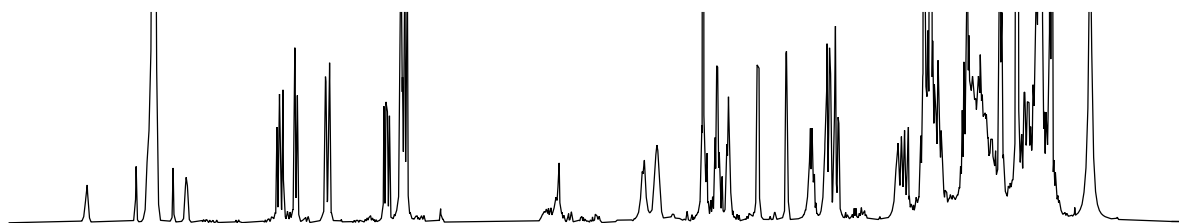

ent\_7\_FD895natural\_HZ05f3\_HMBC\_benzene  
Std proton

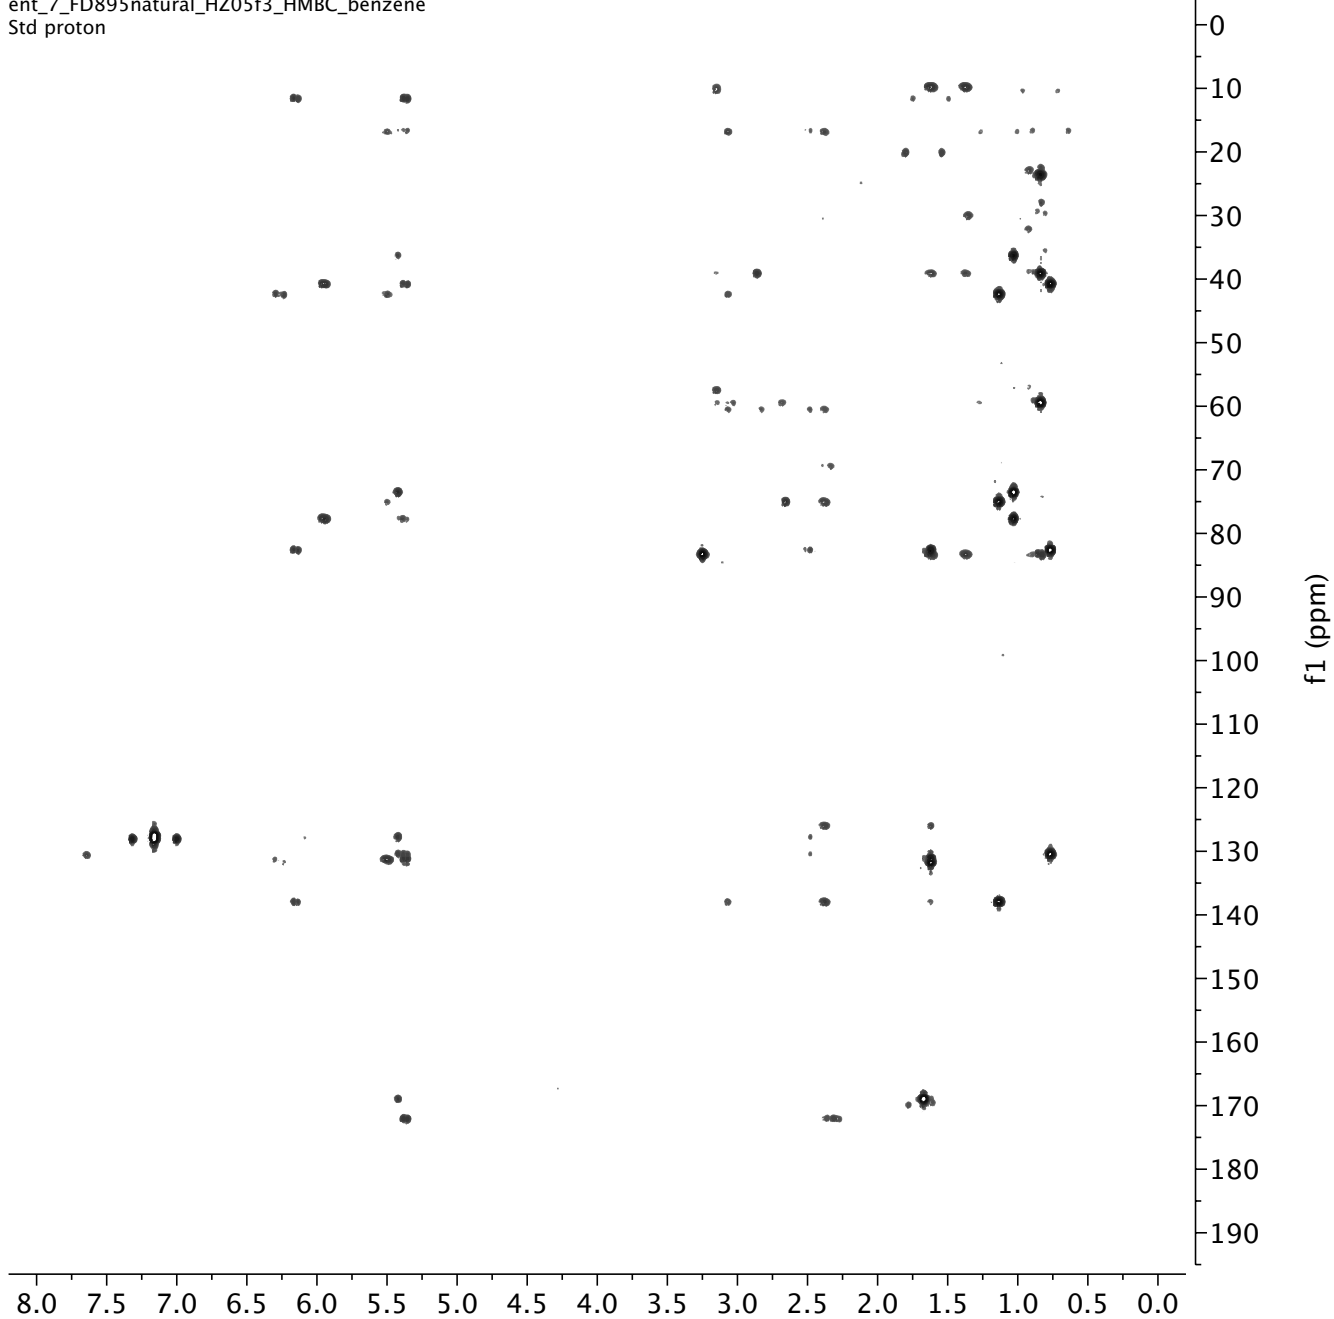

$^1\text{H}$ -NMR (600 MHz) and  $^{13}\text{C}$ -NMR (125 MHz) spectra of 10*R*,11*R*-FD-895 (**1c**) in  $\text{C}_6\text{D}_6$

FD895\_B4\_C10C11.2.fid

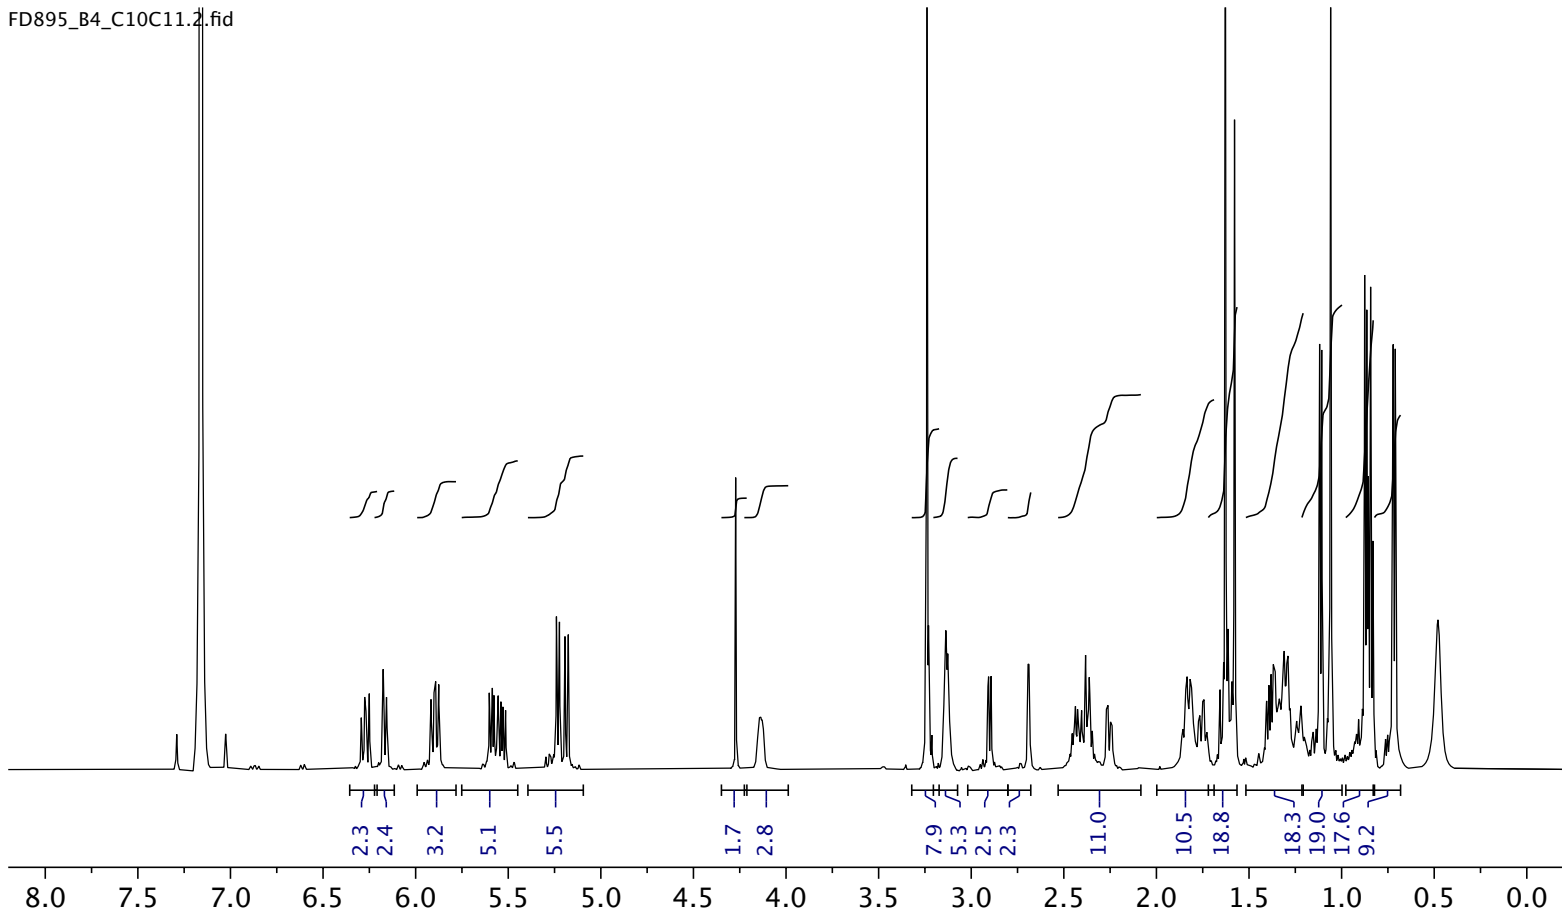

ent\_1011\_FD895natural\_carbon\_benzene  
Std carbon

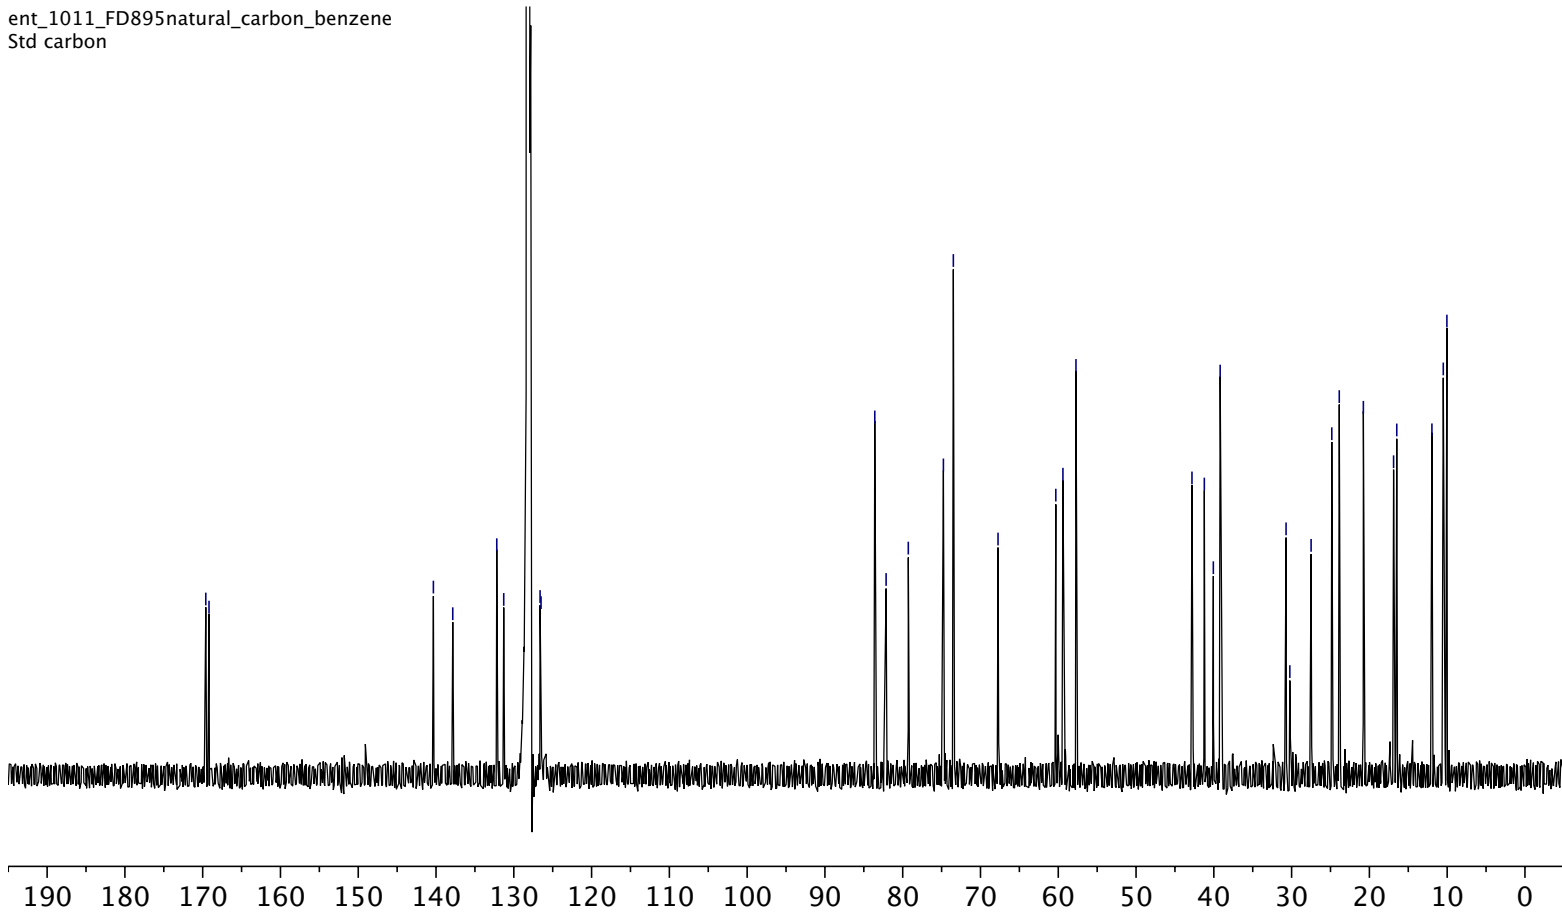



$^1\text{H}, ^1\text{H}$ -gCOSY (500 MHz) spectrum of 10*R*,11*R*-FD-895 (**1c**) in  $\text{C}_6\text{D}_6$

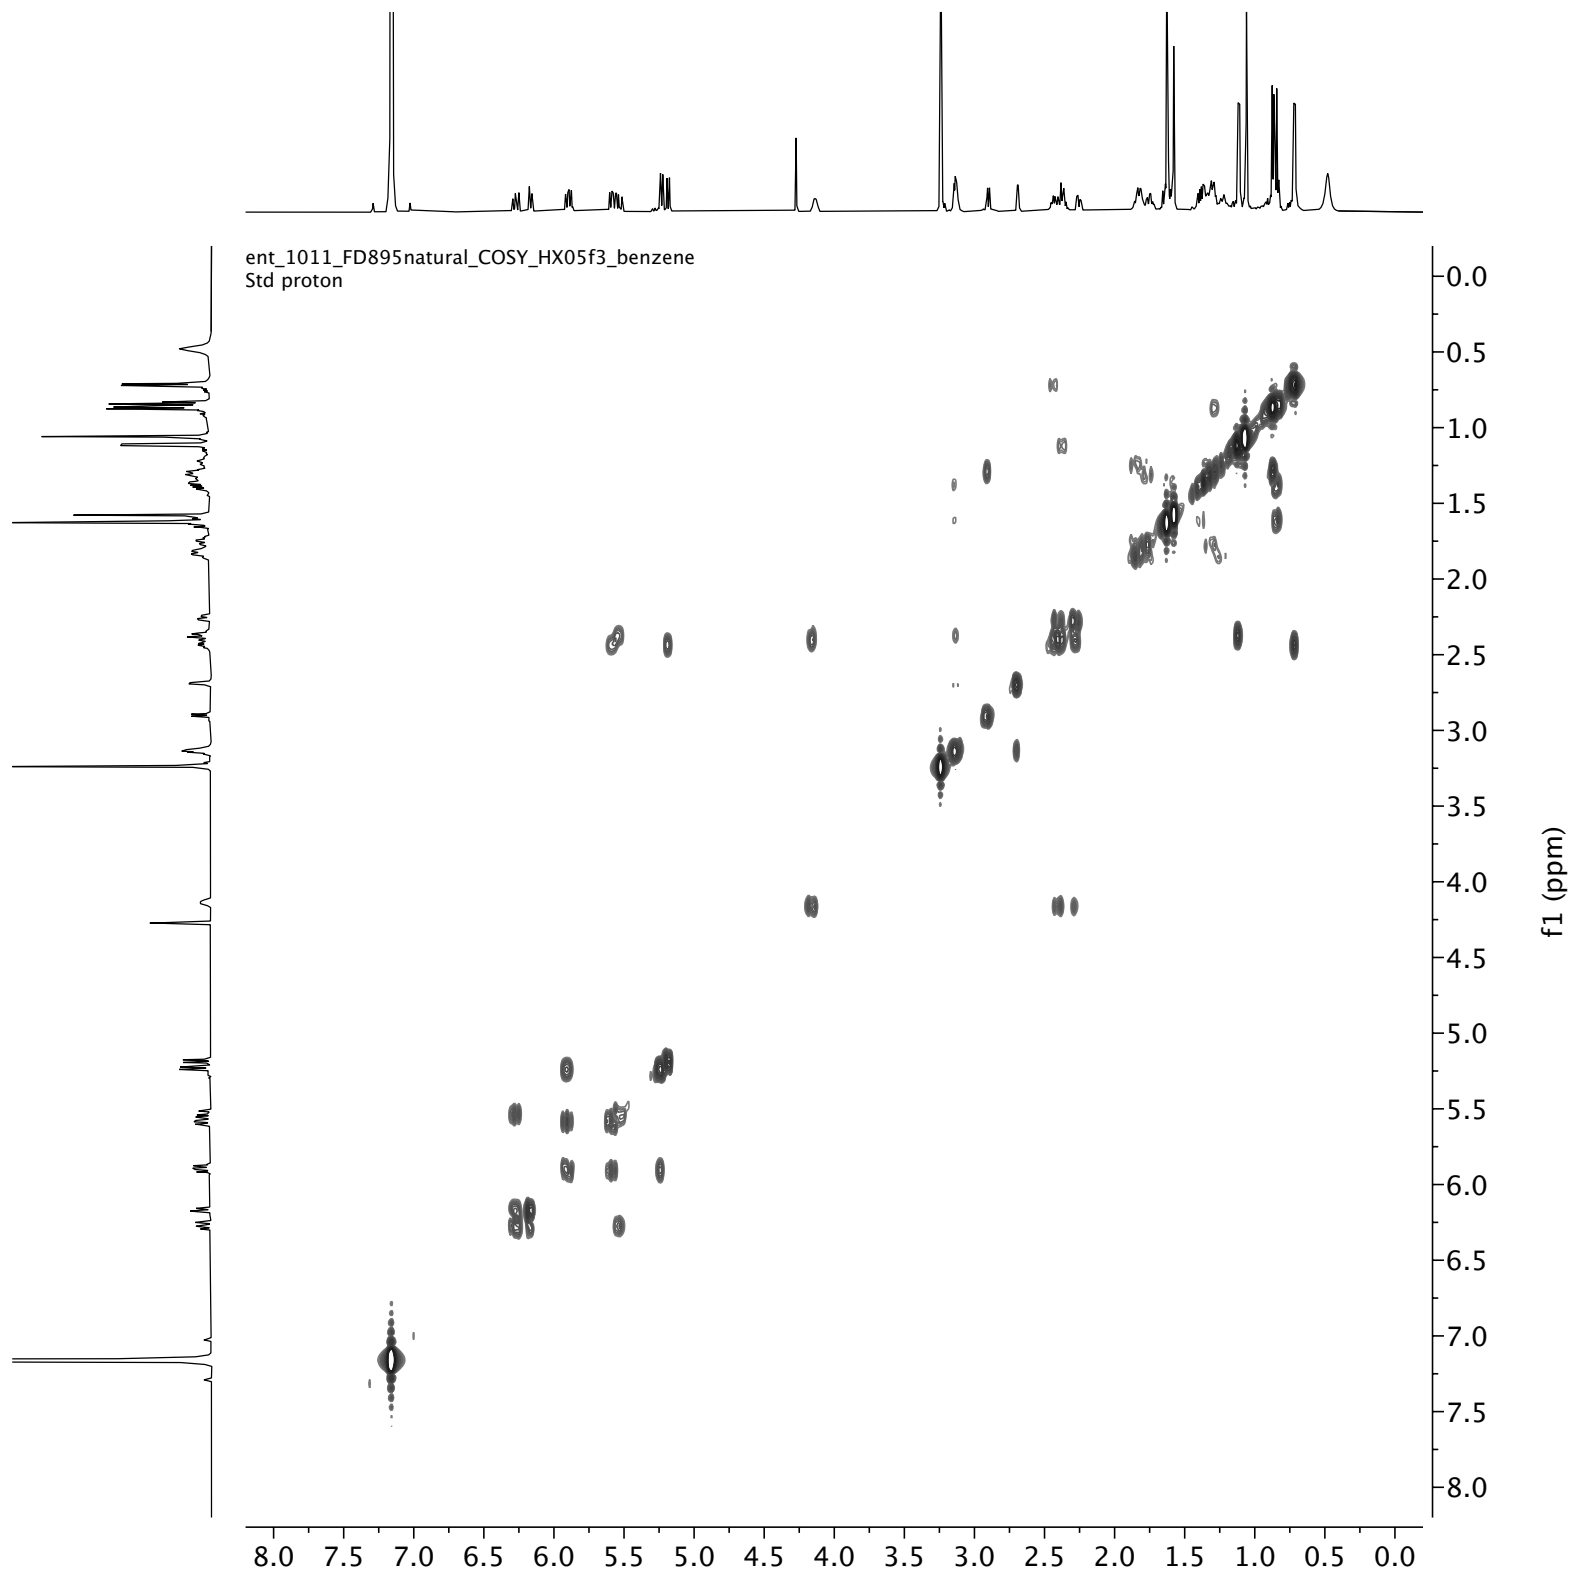

$^1\text{H}$ ,  $^1\text{H}$ -NOESY (500 MHz) spectrum of 10*R*,11*R*-FD-895 (**1c**) in  $\text{C}_6\text{D}_6$

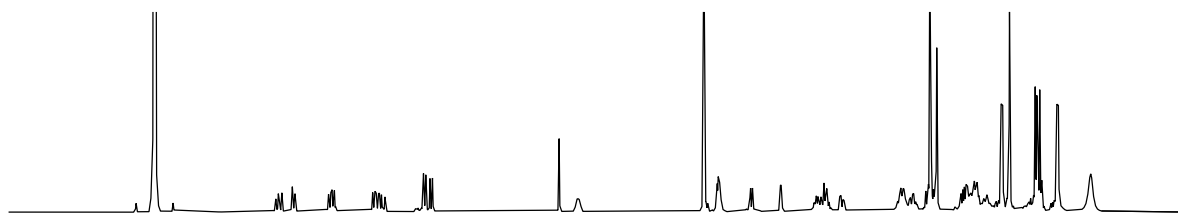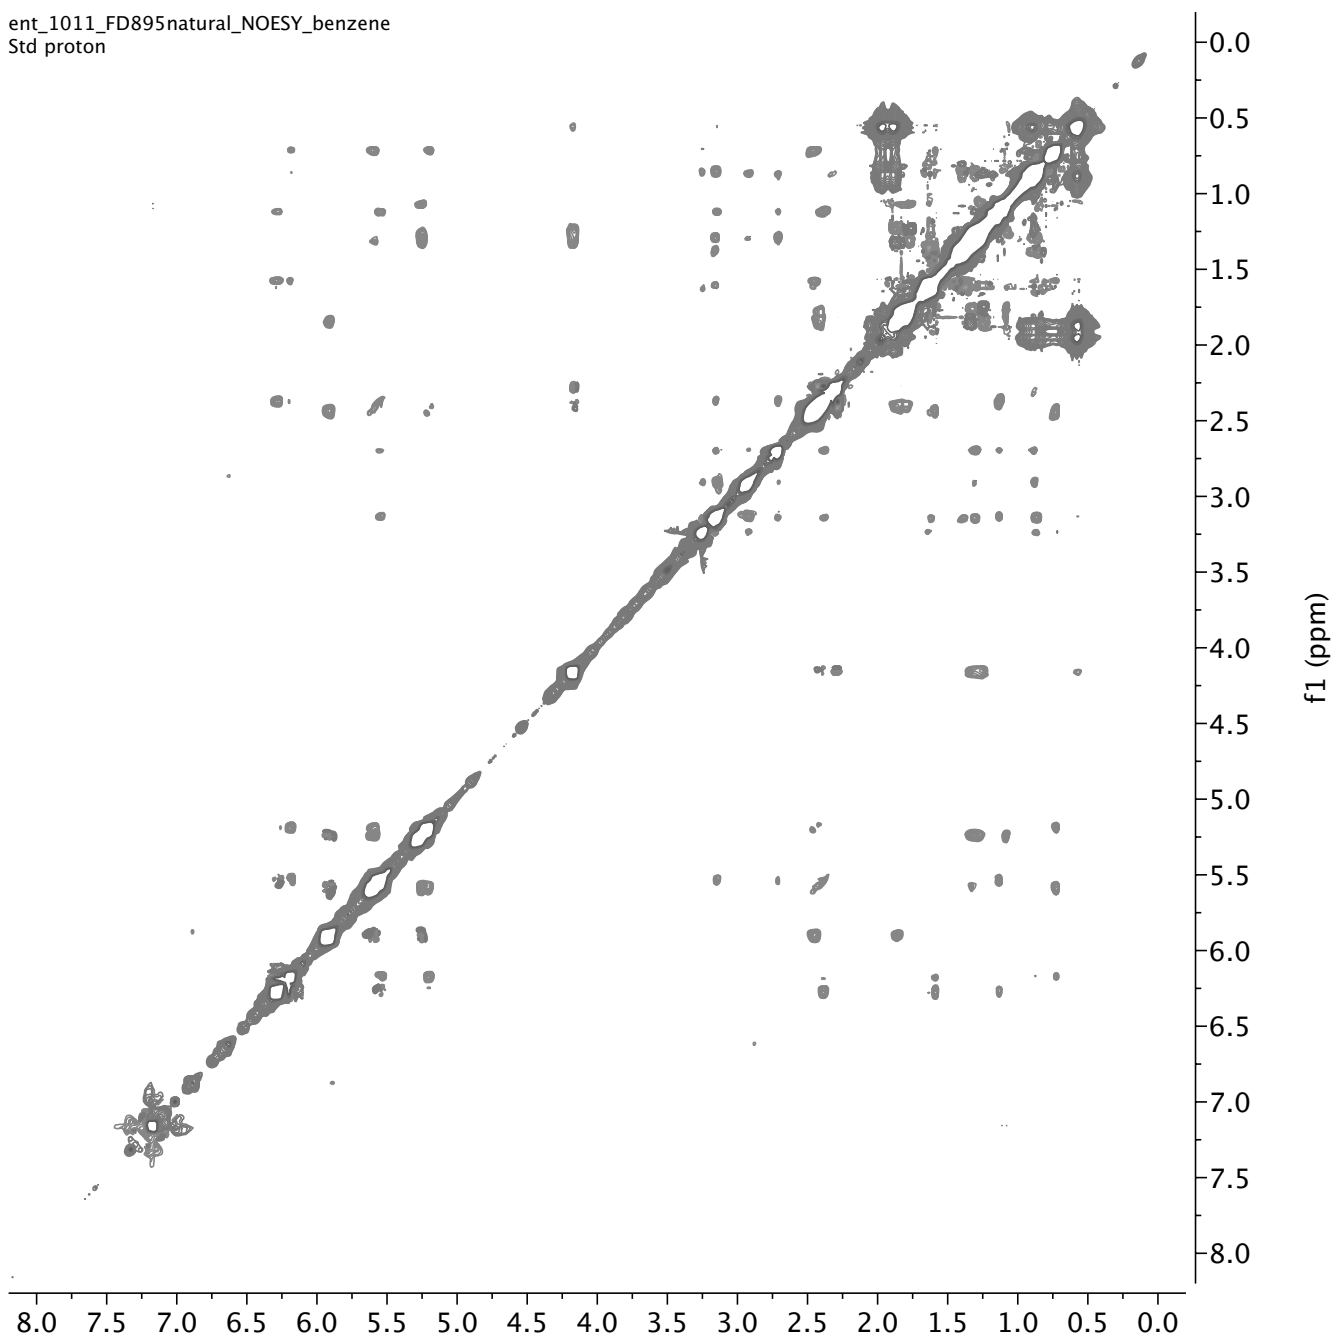

$^1\text{H}, ^{13}\text{C}$ -HSQC (600 MHz) spectrum of 10*R*,11*R*-FD-895 (**1c**) in  $\text{C}_6\text{D}_6$

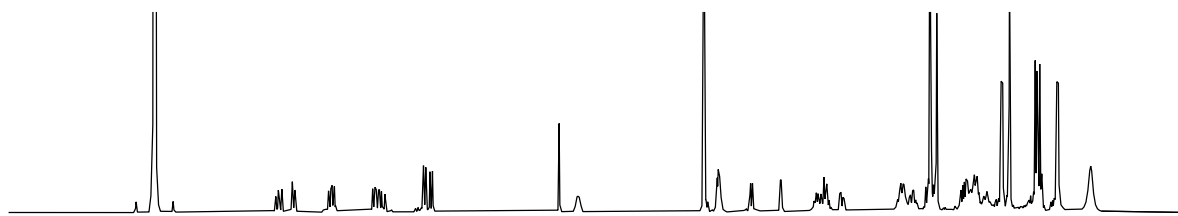

FD895\_B4\_C10C11.3.ser

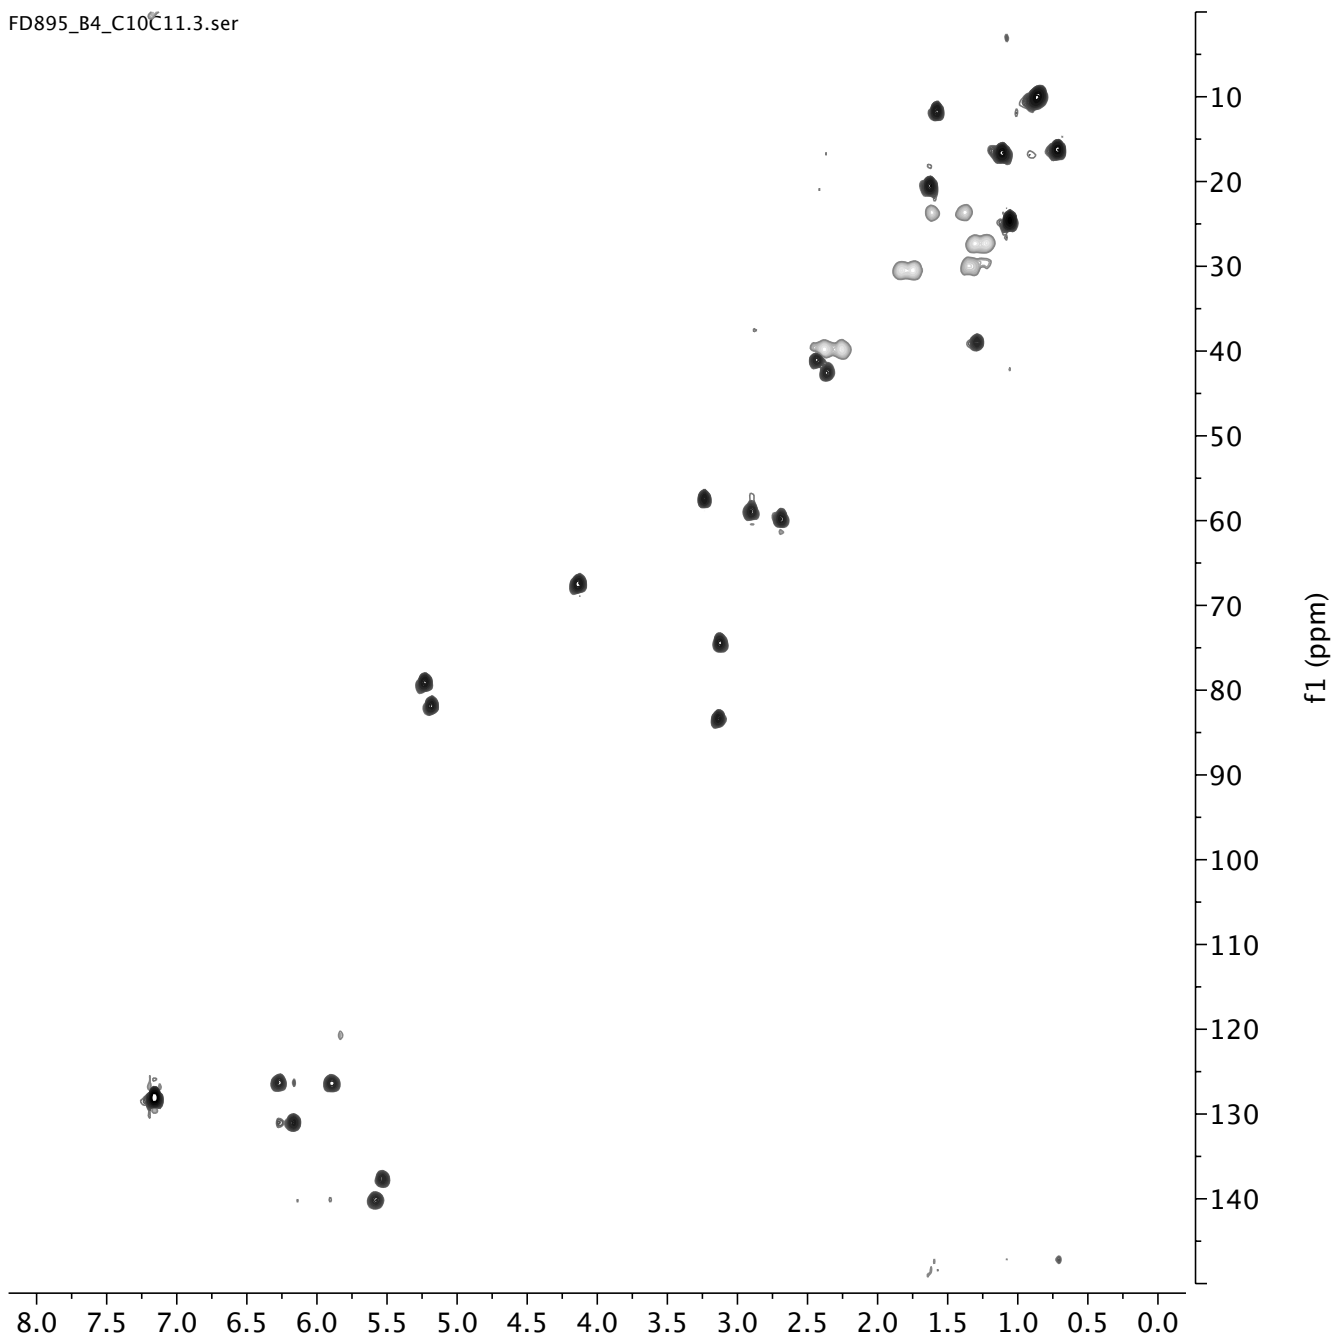

$^1\text{H}, ^{13}\text{C}$ -HMBC (500 MHz) spectrum of 10*R*,11*R*-FD-895 (**1c**) in  $\text{C}_6\text{D}_6$

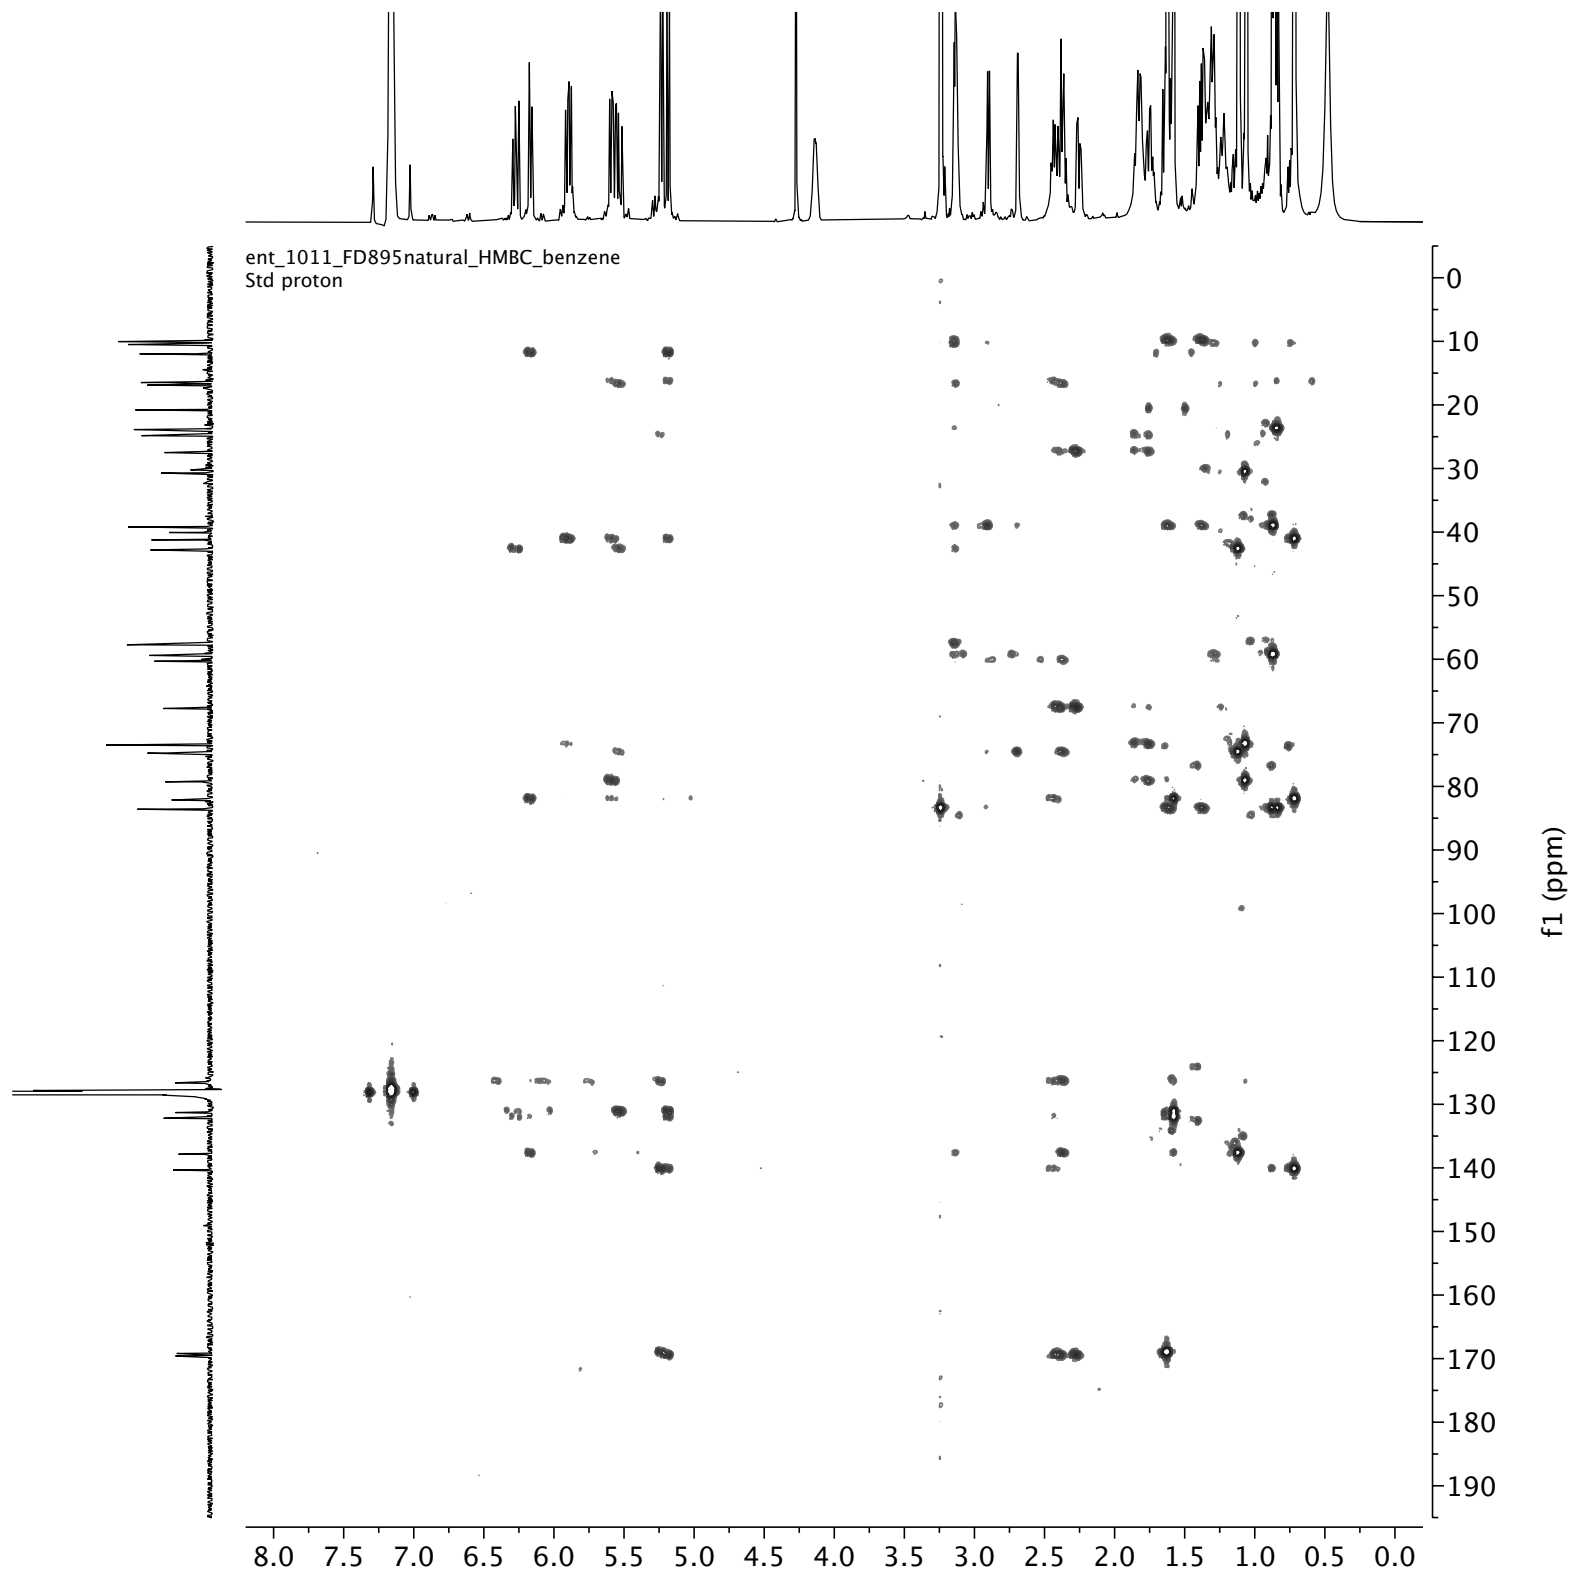

$^1\text{H}$ -NMR (500 MHz) and  $^{13}\text{C}$ -NMR (125 MHz) spectra of 17S-FD-895 (1d) in  $\text{C}_6\text{D}_6$

17S\_IM01\_batchC\_1#a  
Std proton

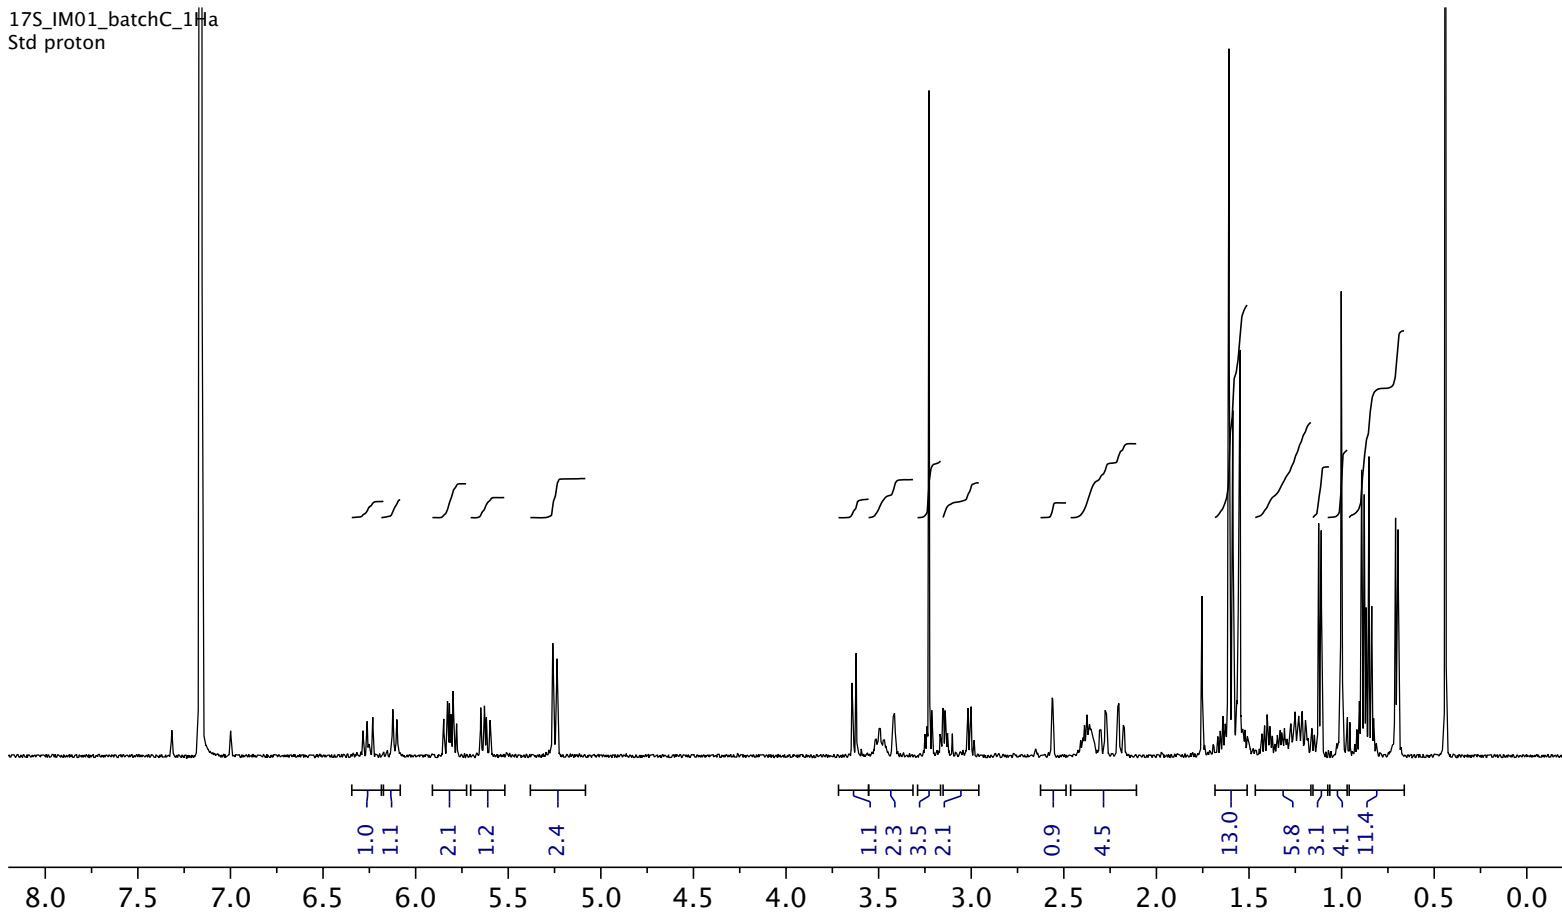

17S\_pure\_carbon\_benzene\_Vx500  
Std carbon

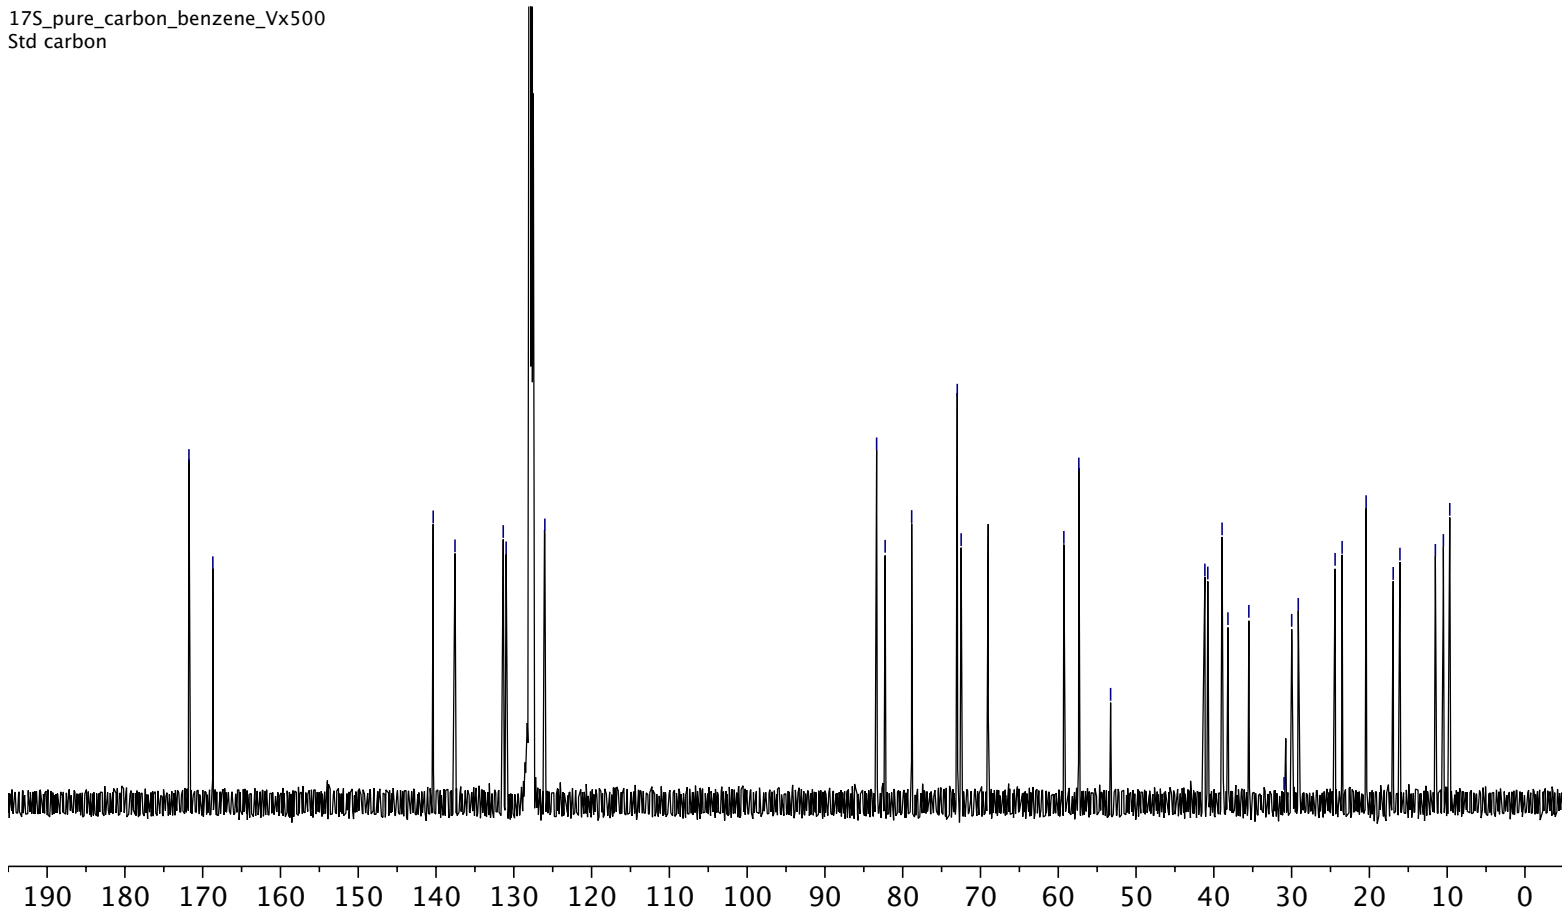

$^1\text{H}, ^1\text{H}$ -gCOSY (500 MHz) spectrum of 17S-FD-895 (**1d**) in  $\text{C}_6\text{D}_6$

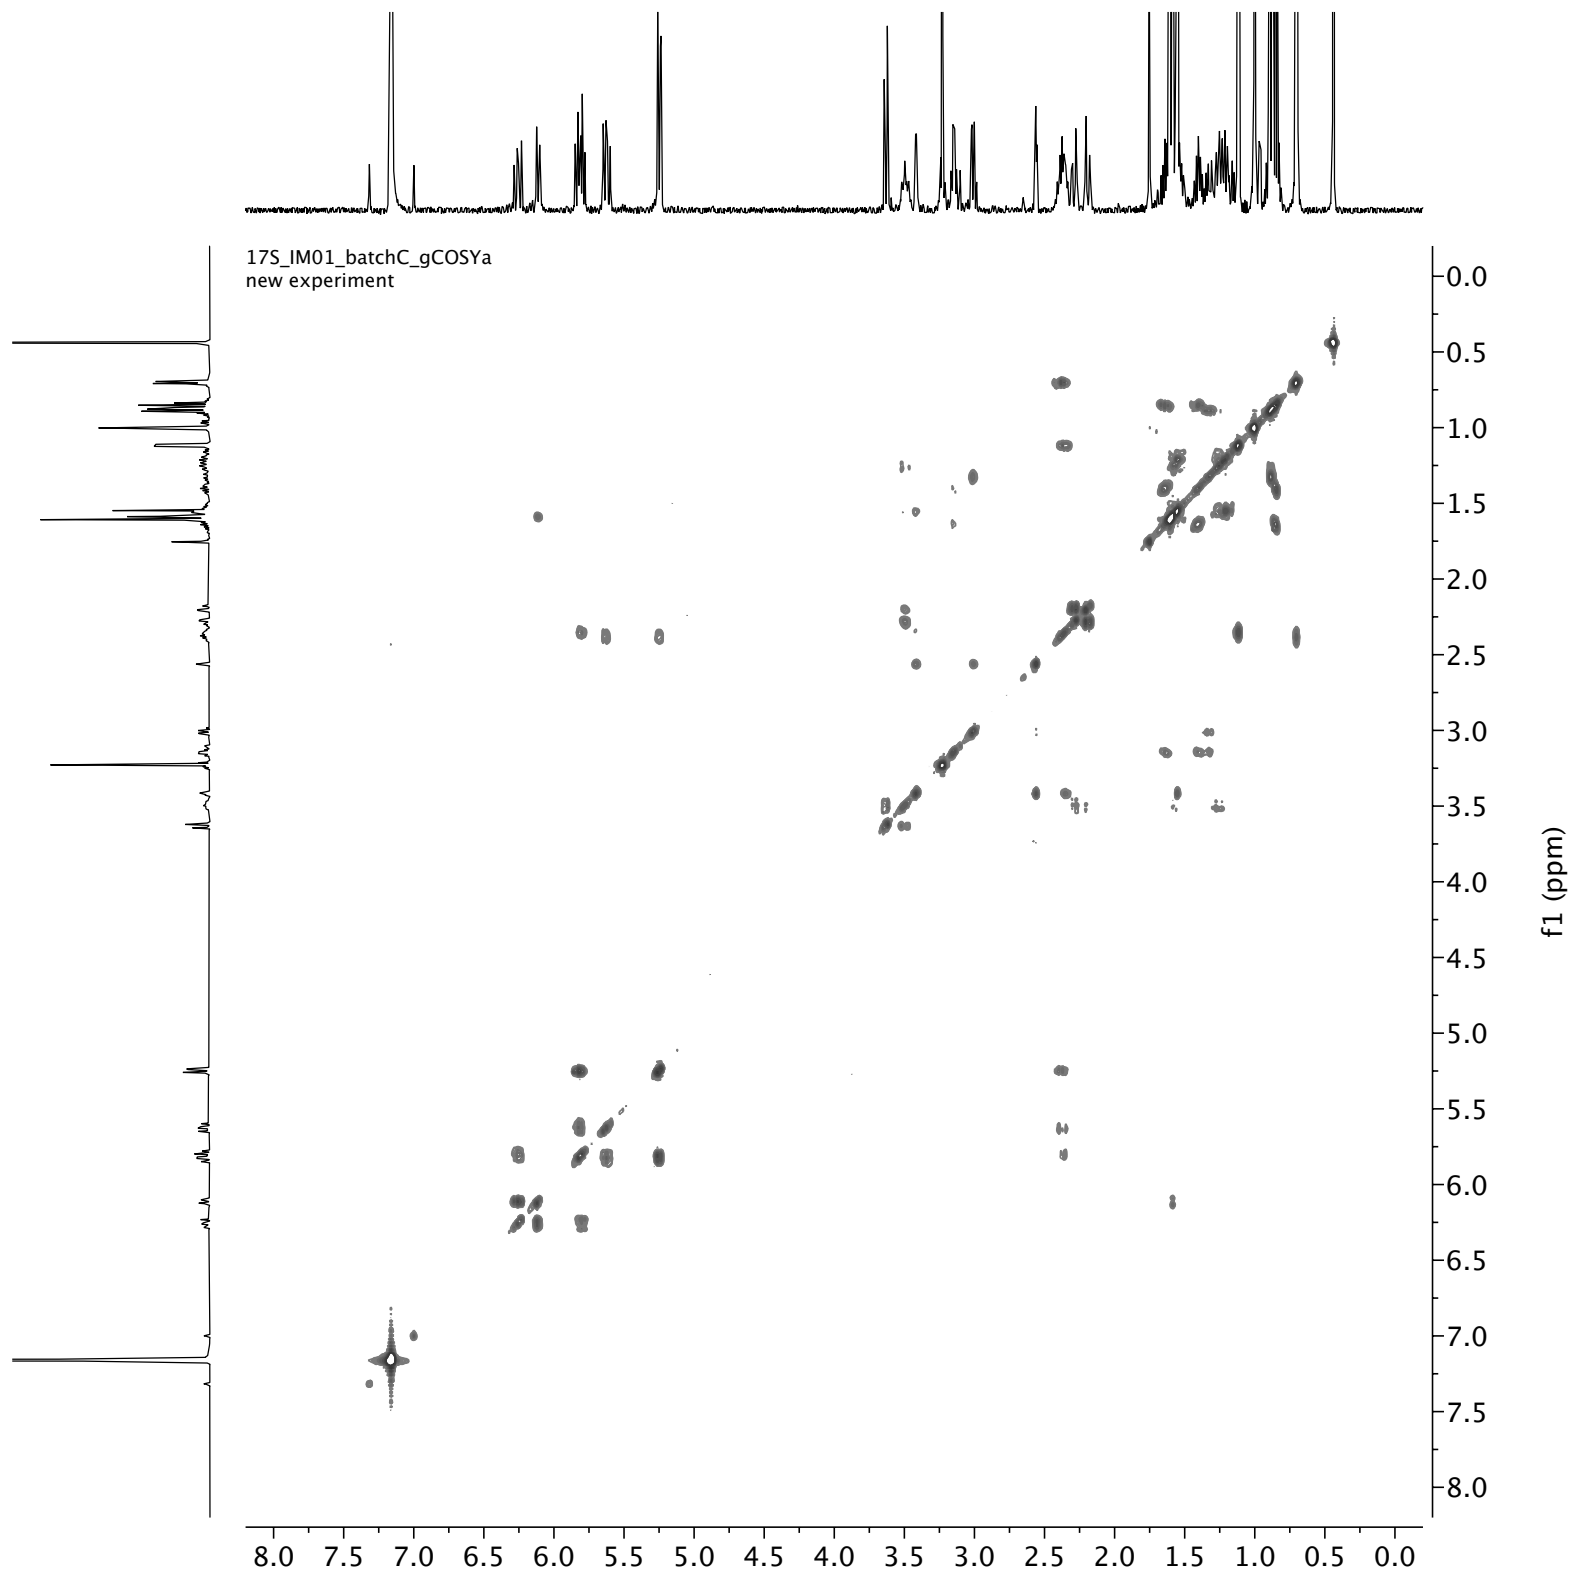

$^1\text{H}, ^1\text{H}$ -NOESY (500 MHz) spectrum of 17S-FD-895 (**1d**) in  $\text{C}_6\text{D}_6$

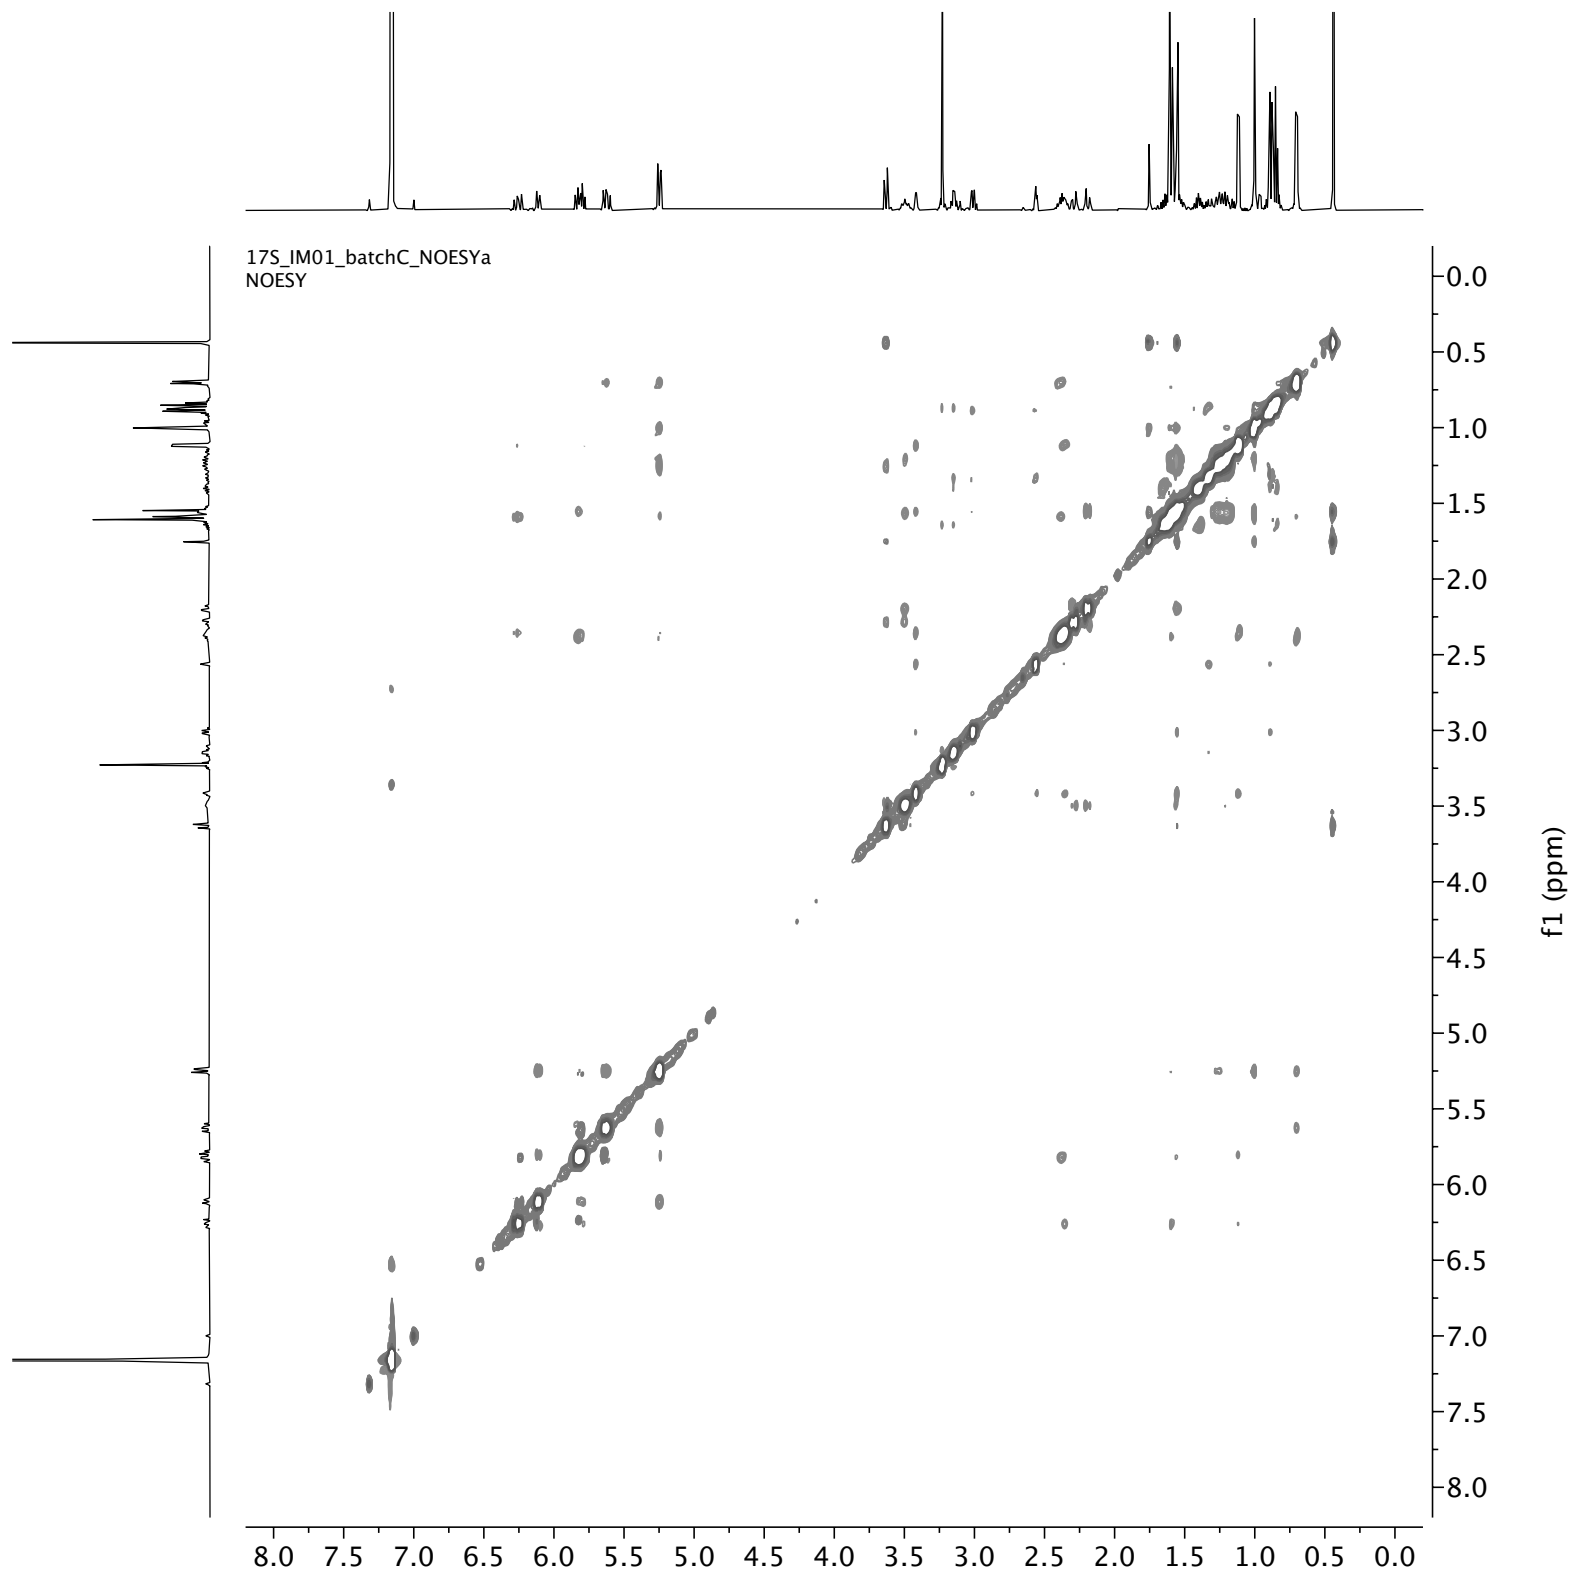

$^1\text{H}$ ,  $^1\text{H}$ -TOCSY (500 MHz) spectrum of 17S-FD-895 (**1d**) in  $\text{C}_6\text{D}_6$

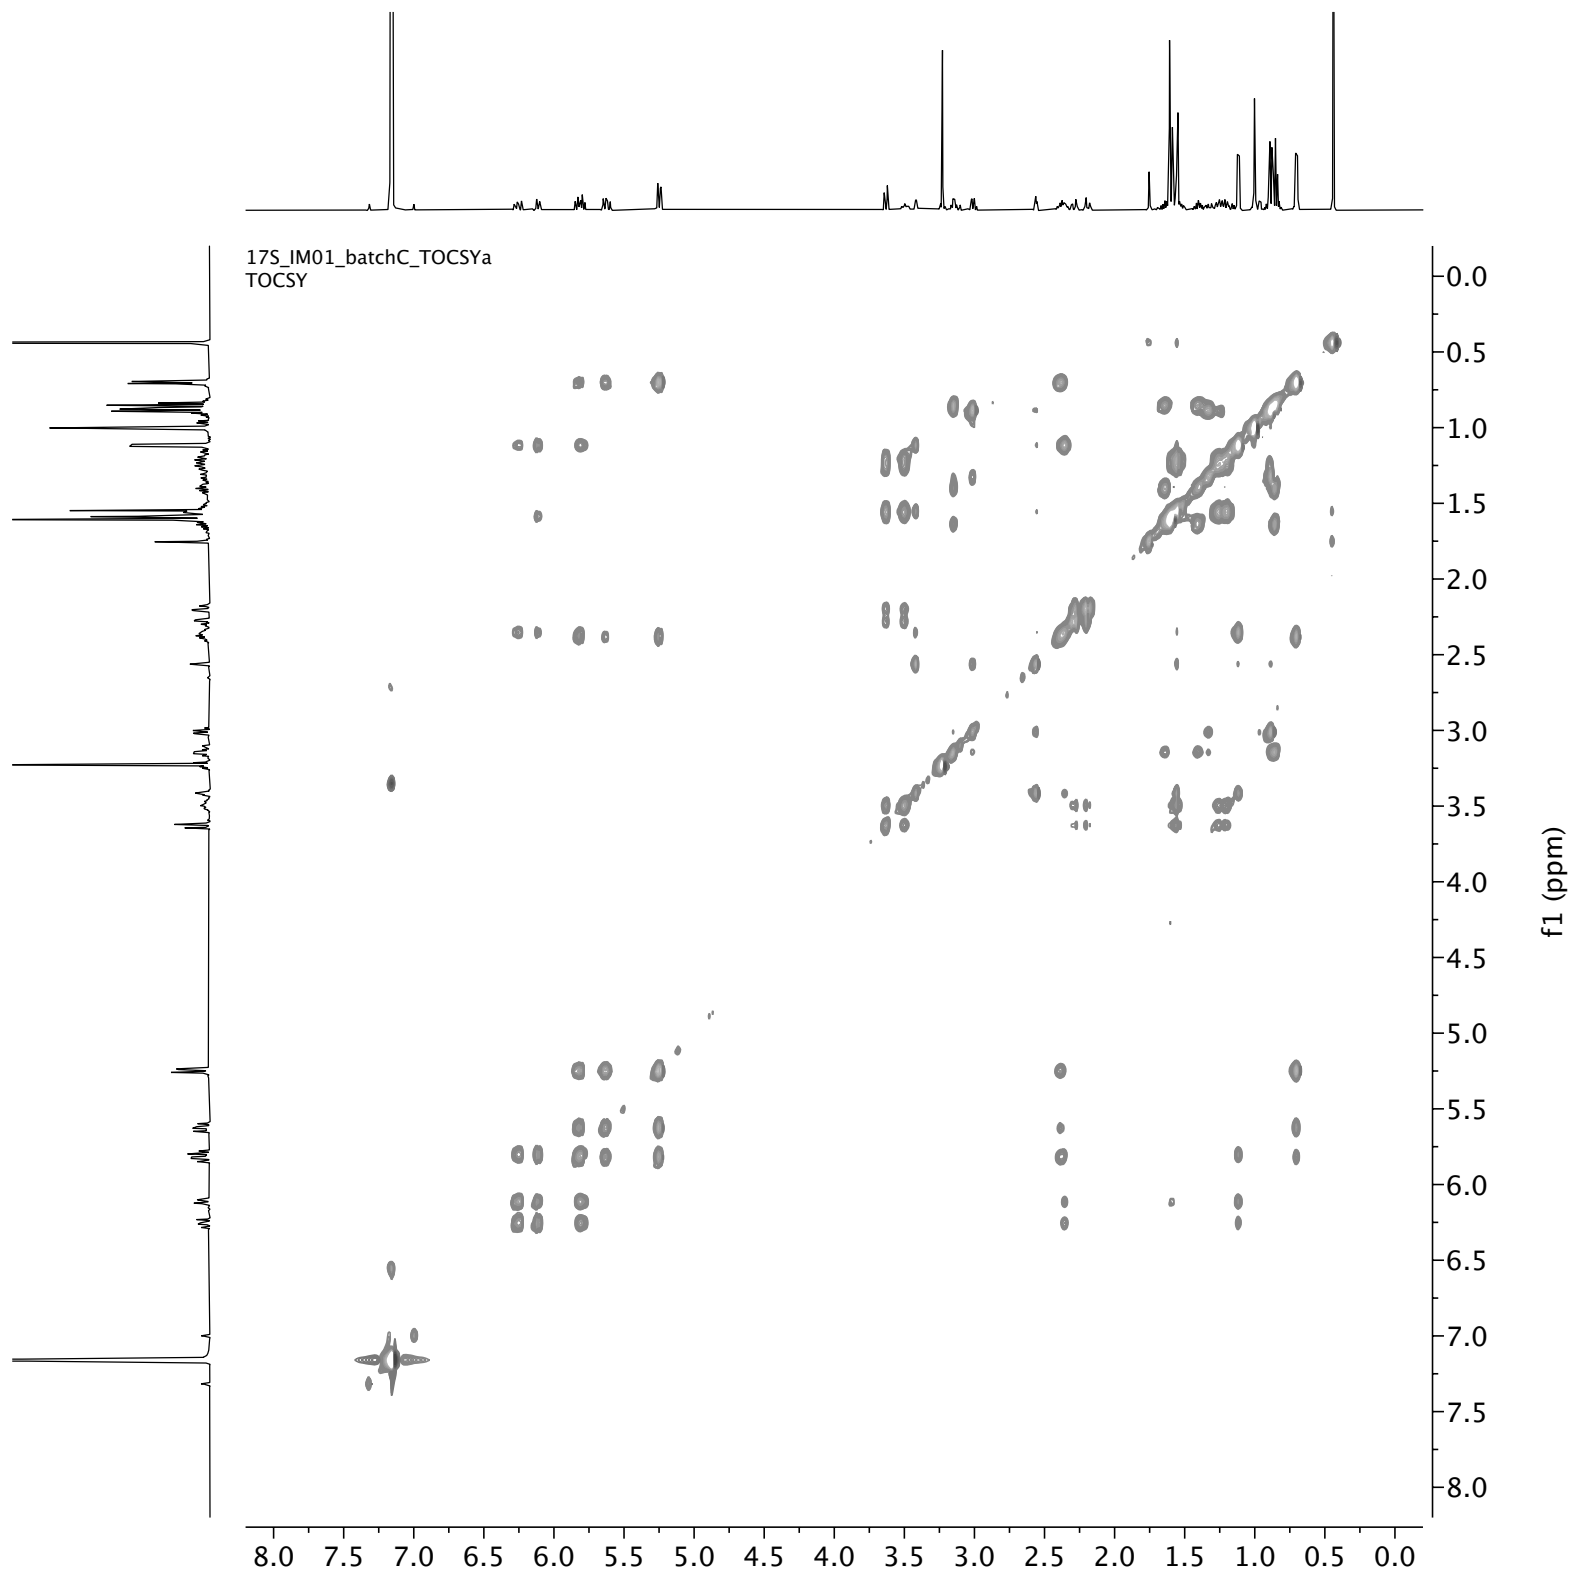



$^1\text{H}, ^{13}\text{C}$ -HSQC (500 MHz) spectrum of 17S-FD-895 (**1d**) in  $\text{C}_6\text{D}_6$

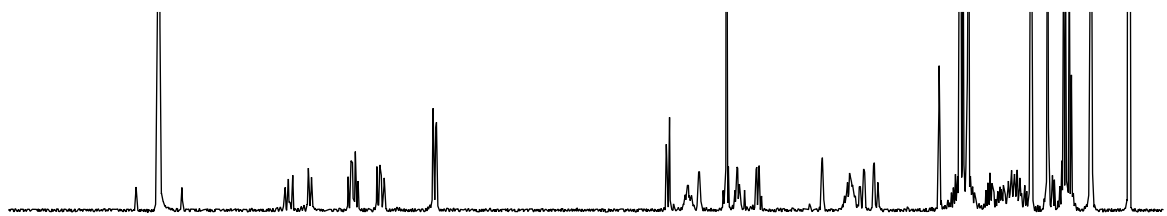

17S\_pure\_hsqc\_benzene\_vx500\_2  
Std proton

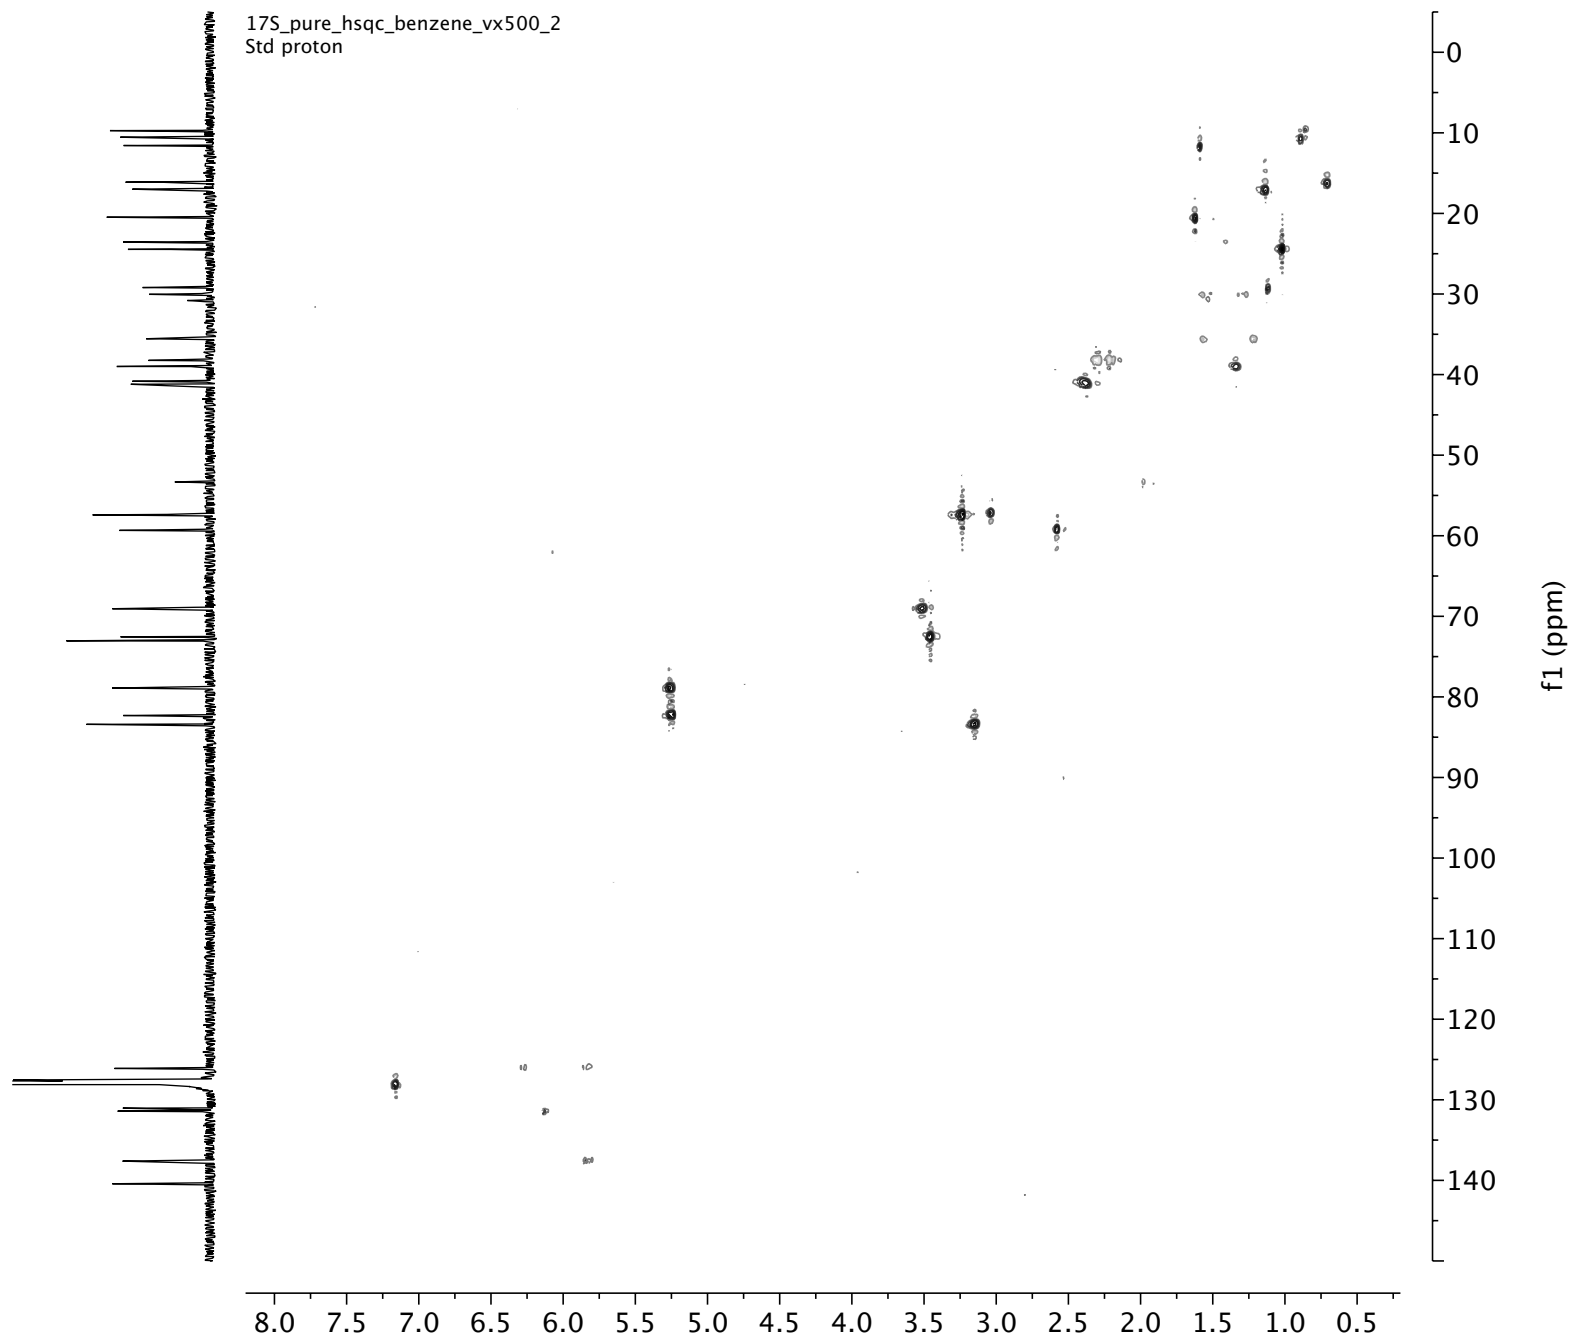

$^1\text{H}, ^{13}\text{C}$ -HSQC (500 MHz) spectrum of 17S-FD-895 (**1d**) in  $\text{C}_6\text{D}_6$

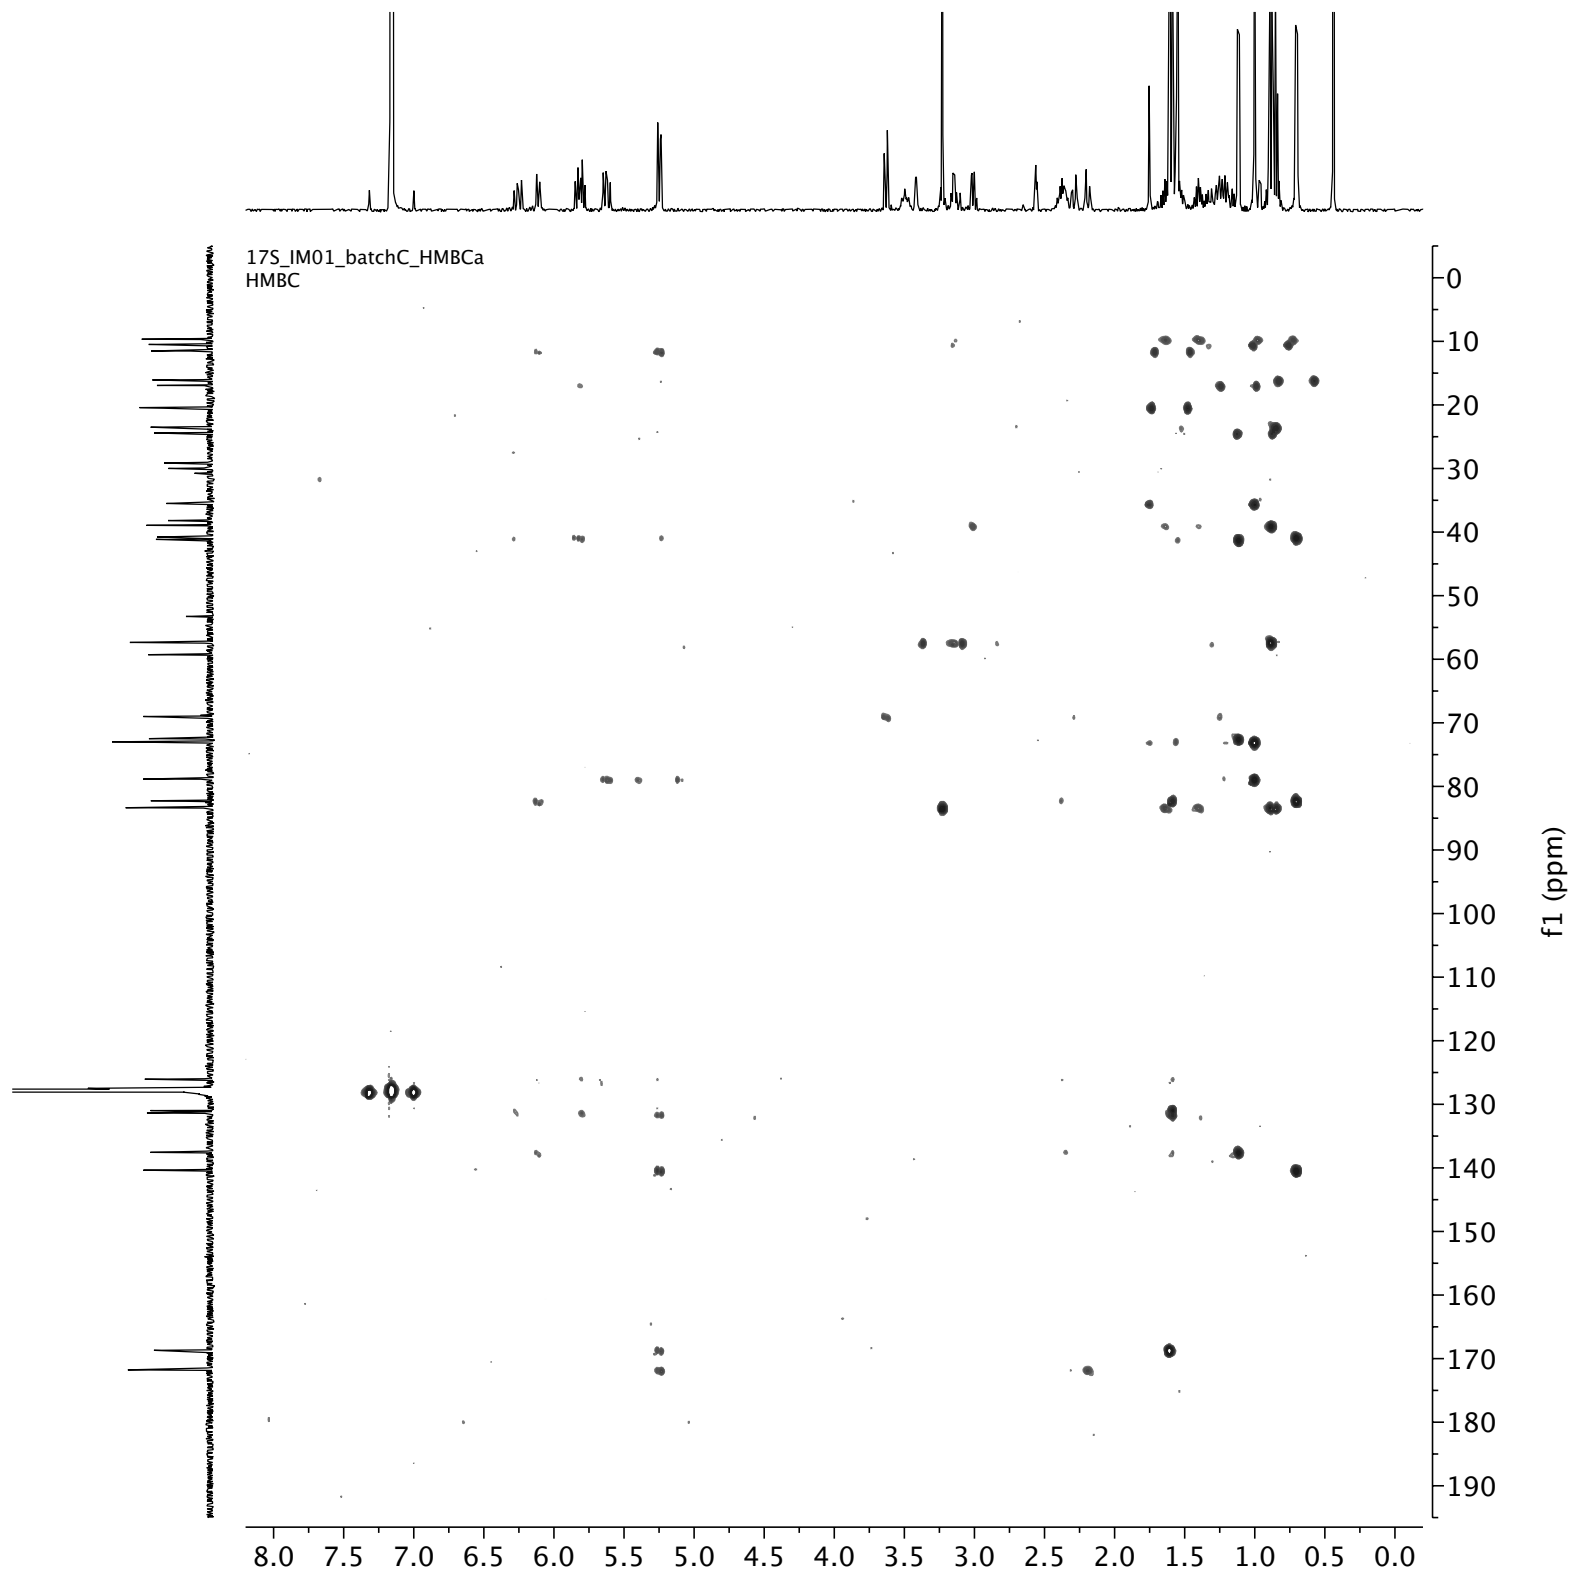

$^1\text{H}$ -NMR (600 MHz) and  $^{13}\text{C}$ -NMR (125 MHz) spectra of 17-O-methyl-FD-895 (**1e**) in  $\text{C}_6\text{D}_6$

17S\_FD895\_C4\_17OMe.7.fid

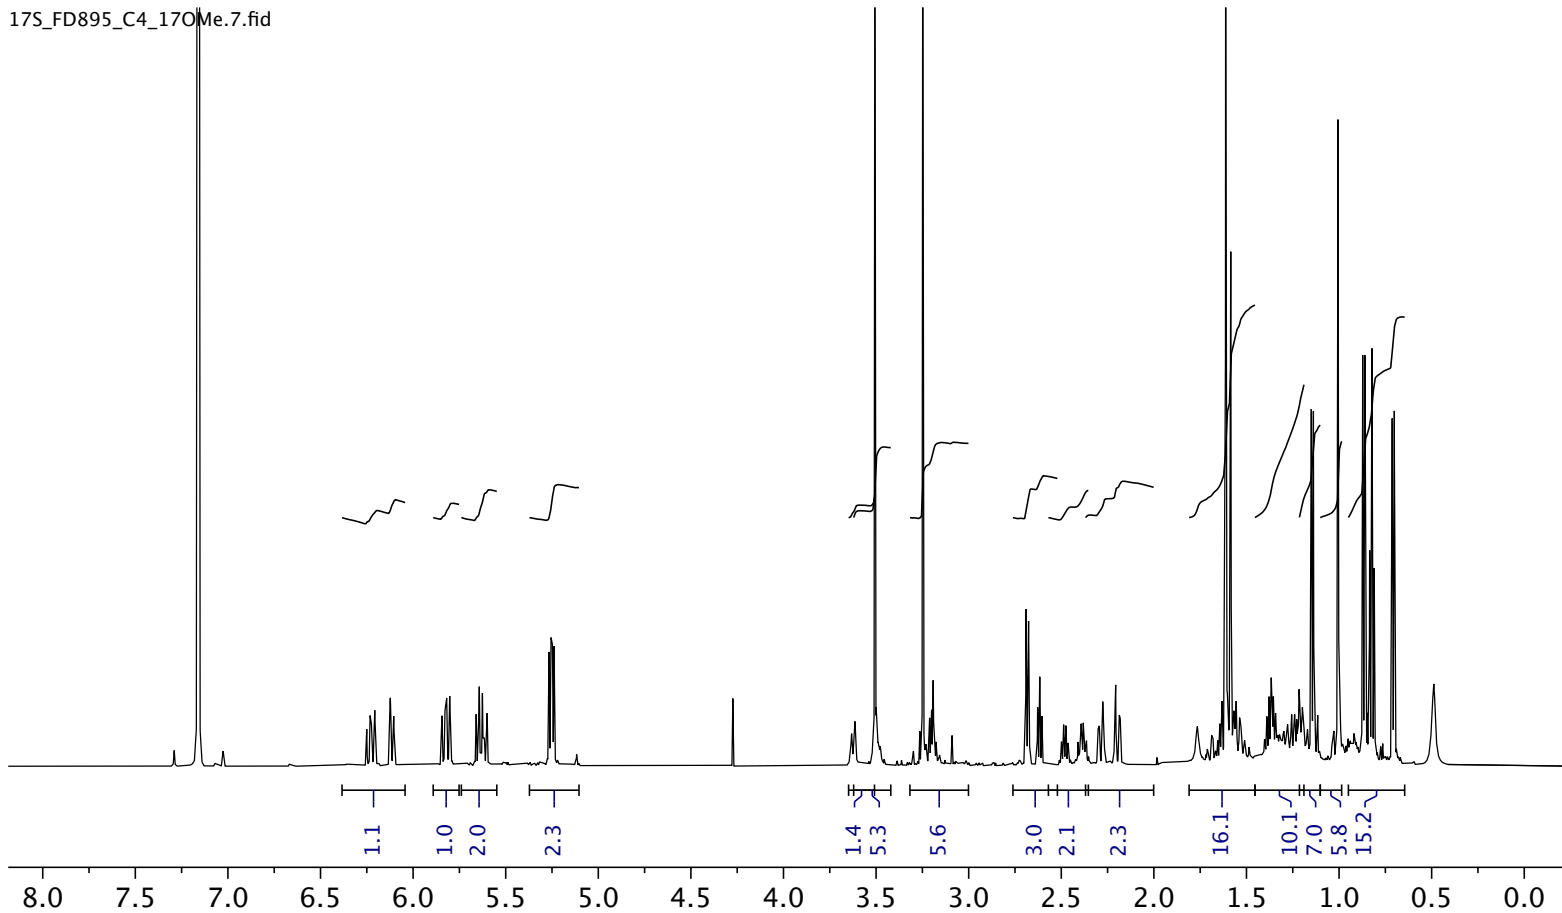

17SOMethylFD895\_pure\_carbon\_benzene  
Std carbon

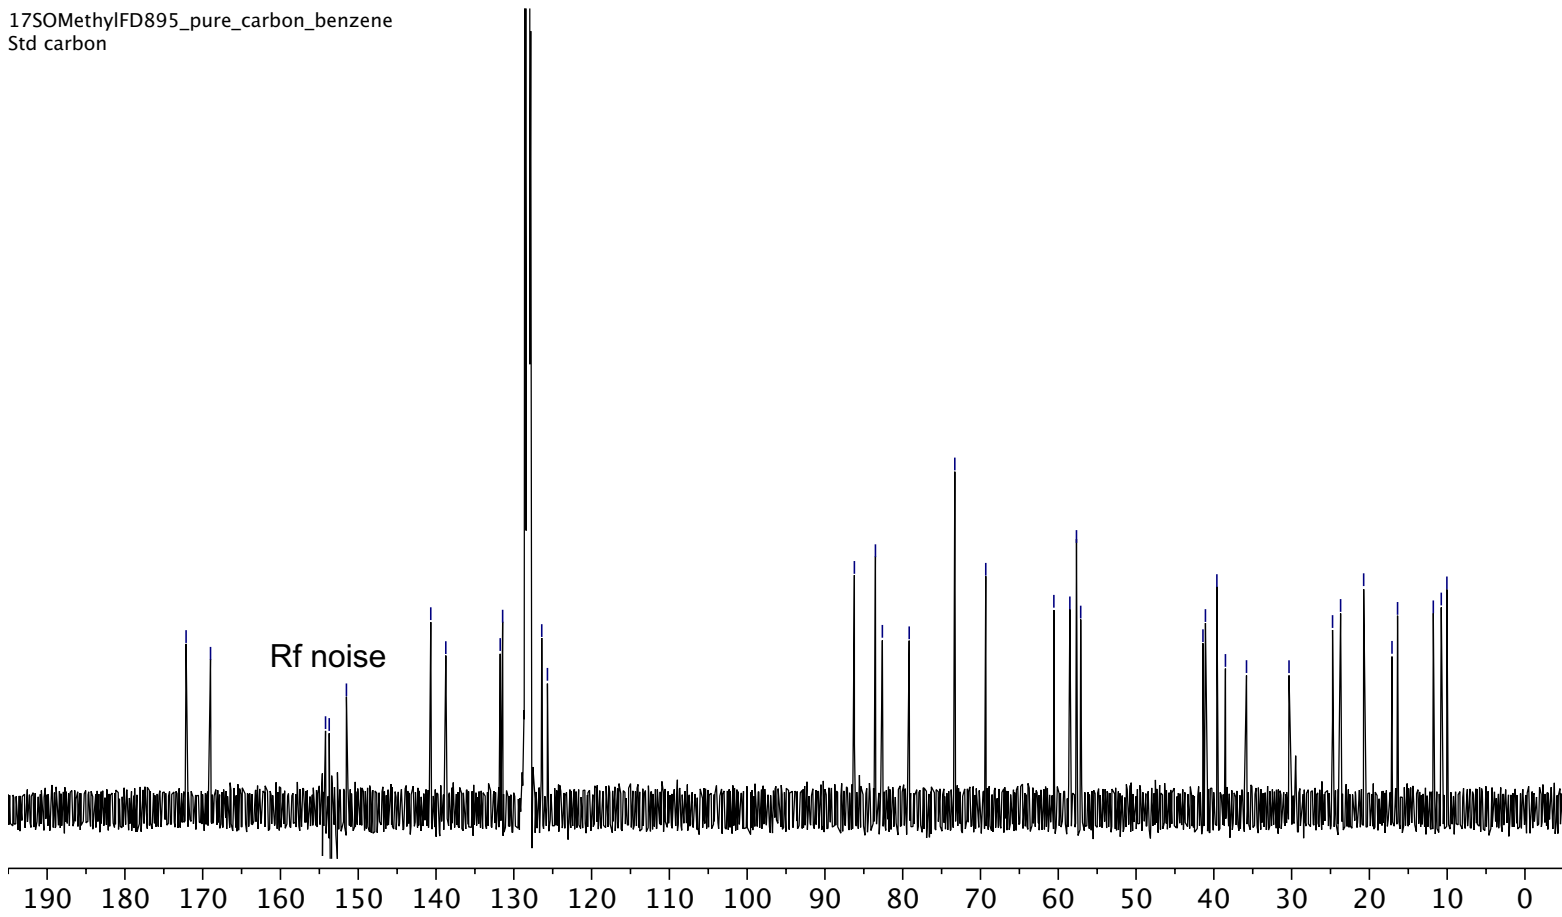

$^1\text{H}, ^1\text{H}$ -COSY (500 MHz) spectrum of 17-O-methyl-FD-895 (**1e**) in  $\text{C}_6\text{D}_6$

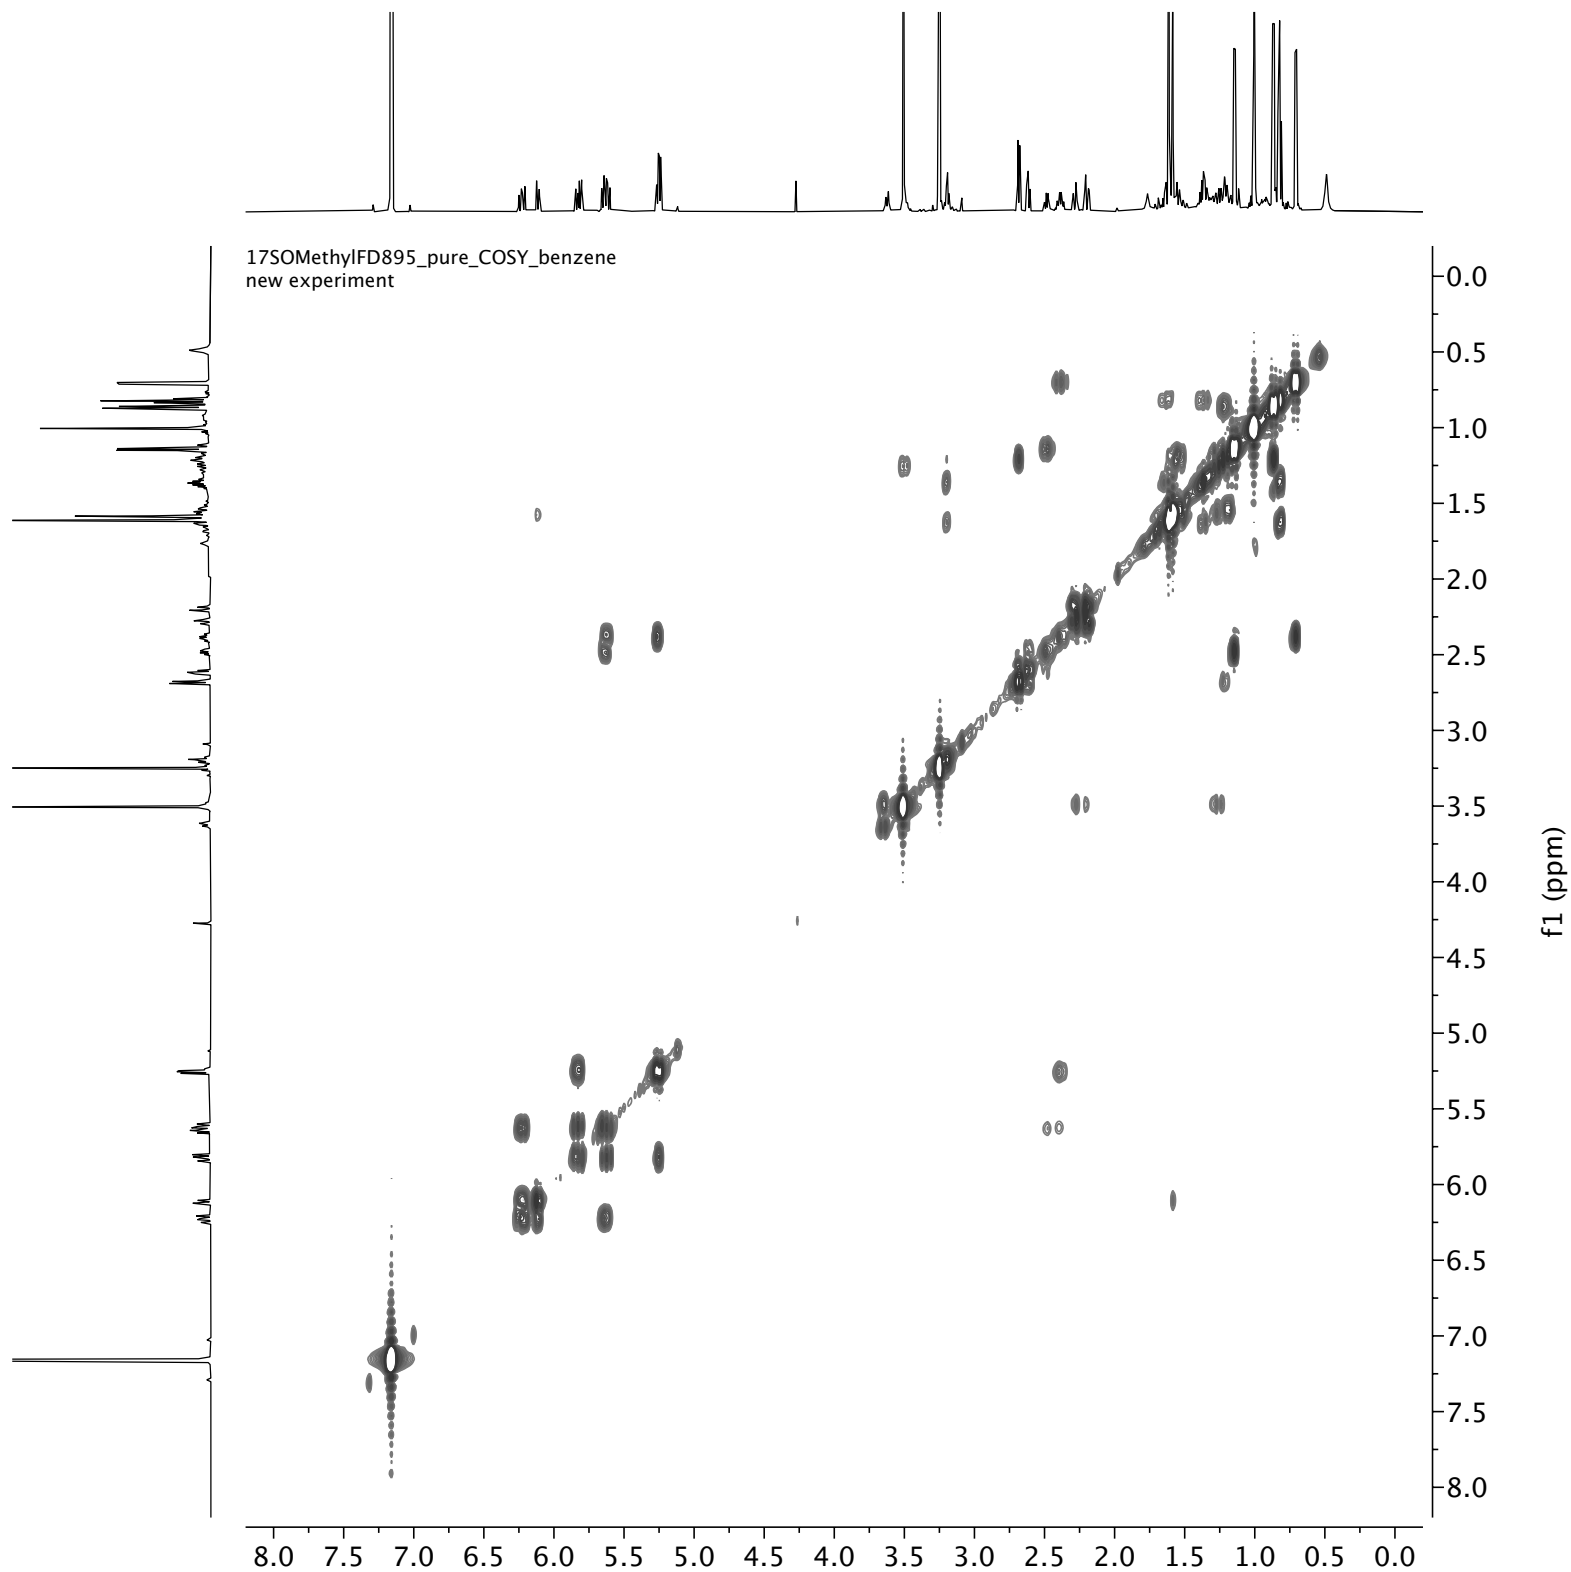

$^1\text{H}$ ,  $^1\text{H}$ -NOESY (600 MHz) spectrum of 17-O-methyl-FD-895 (**1e**) in  $\text{C}_6\text{D}_6$

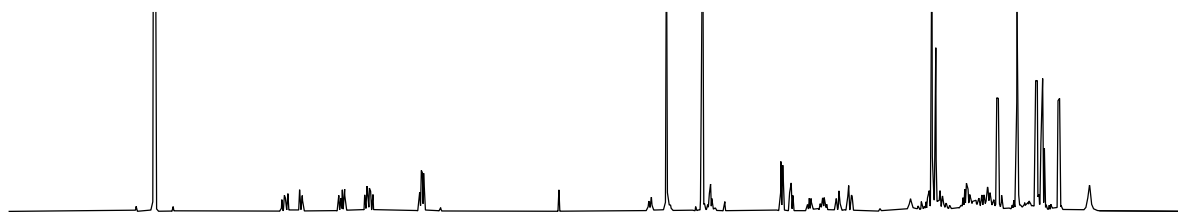

17S\_FD895\_C4\_17OMe.5.ser

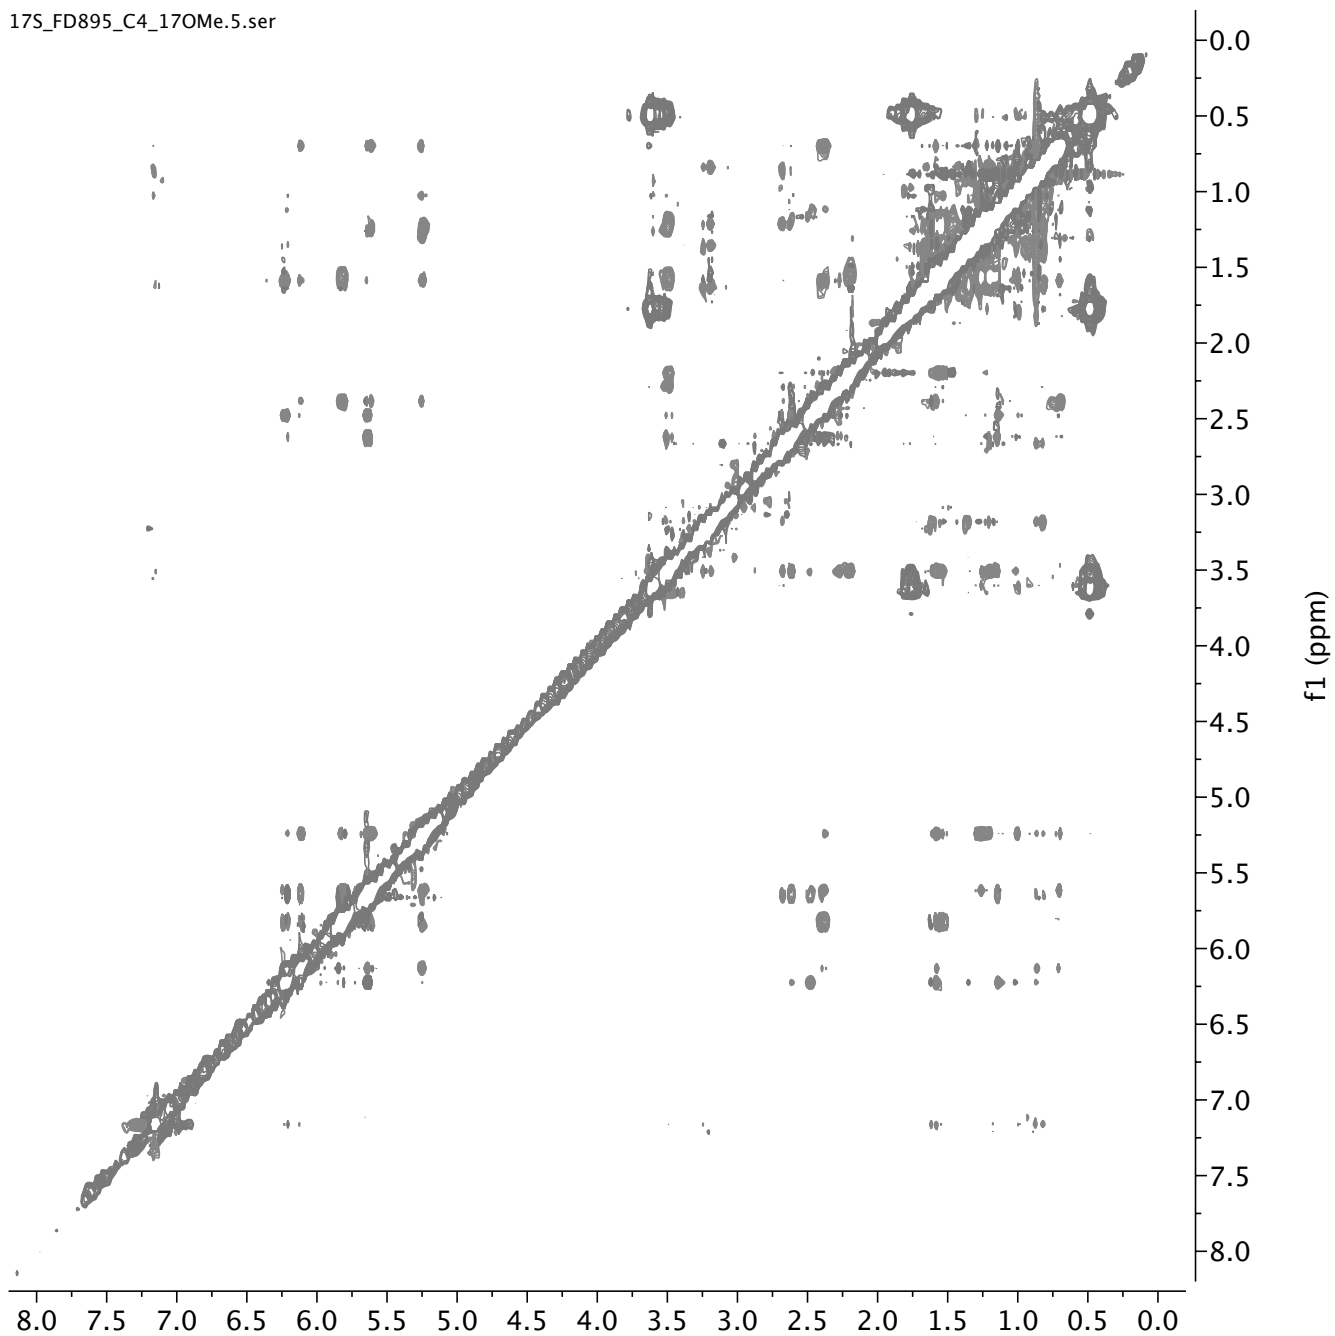

$^1\text{H}, ^{13}\text{C}$ -HSQC (600 MHz) spectrum of 17-O-methyl-FD-895 (**1e**) in  $\text{C}_6\text{D}_6$

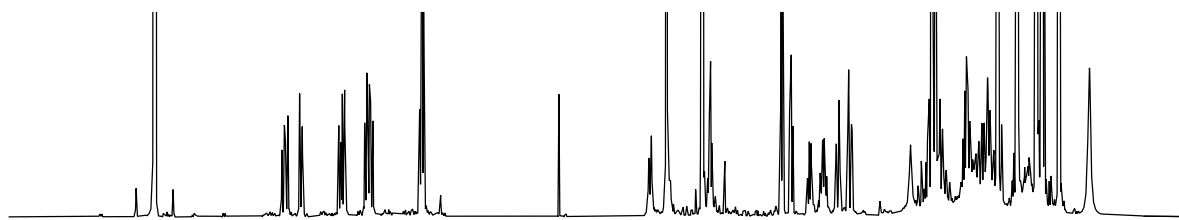

17S\_FD895\_C4\_17OMe.4.ser

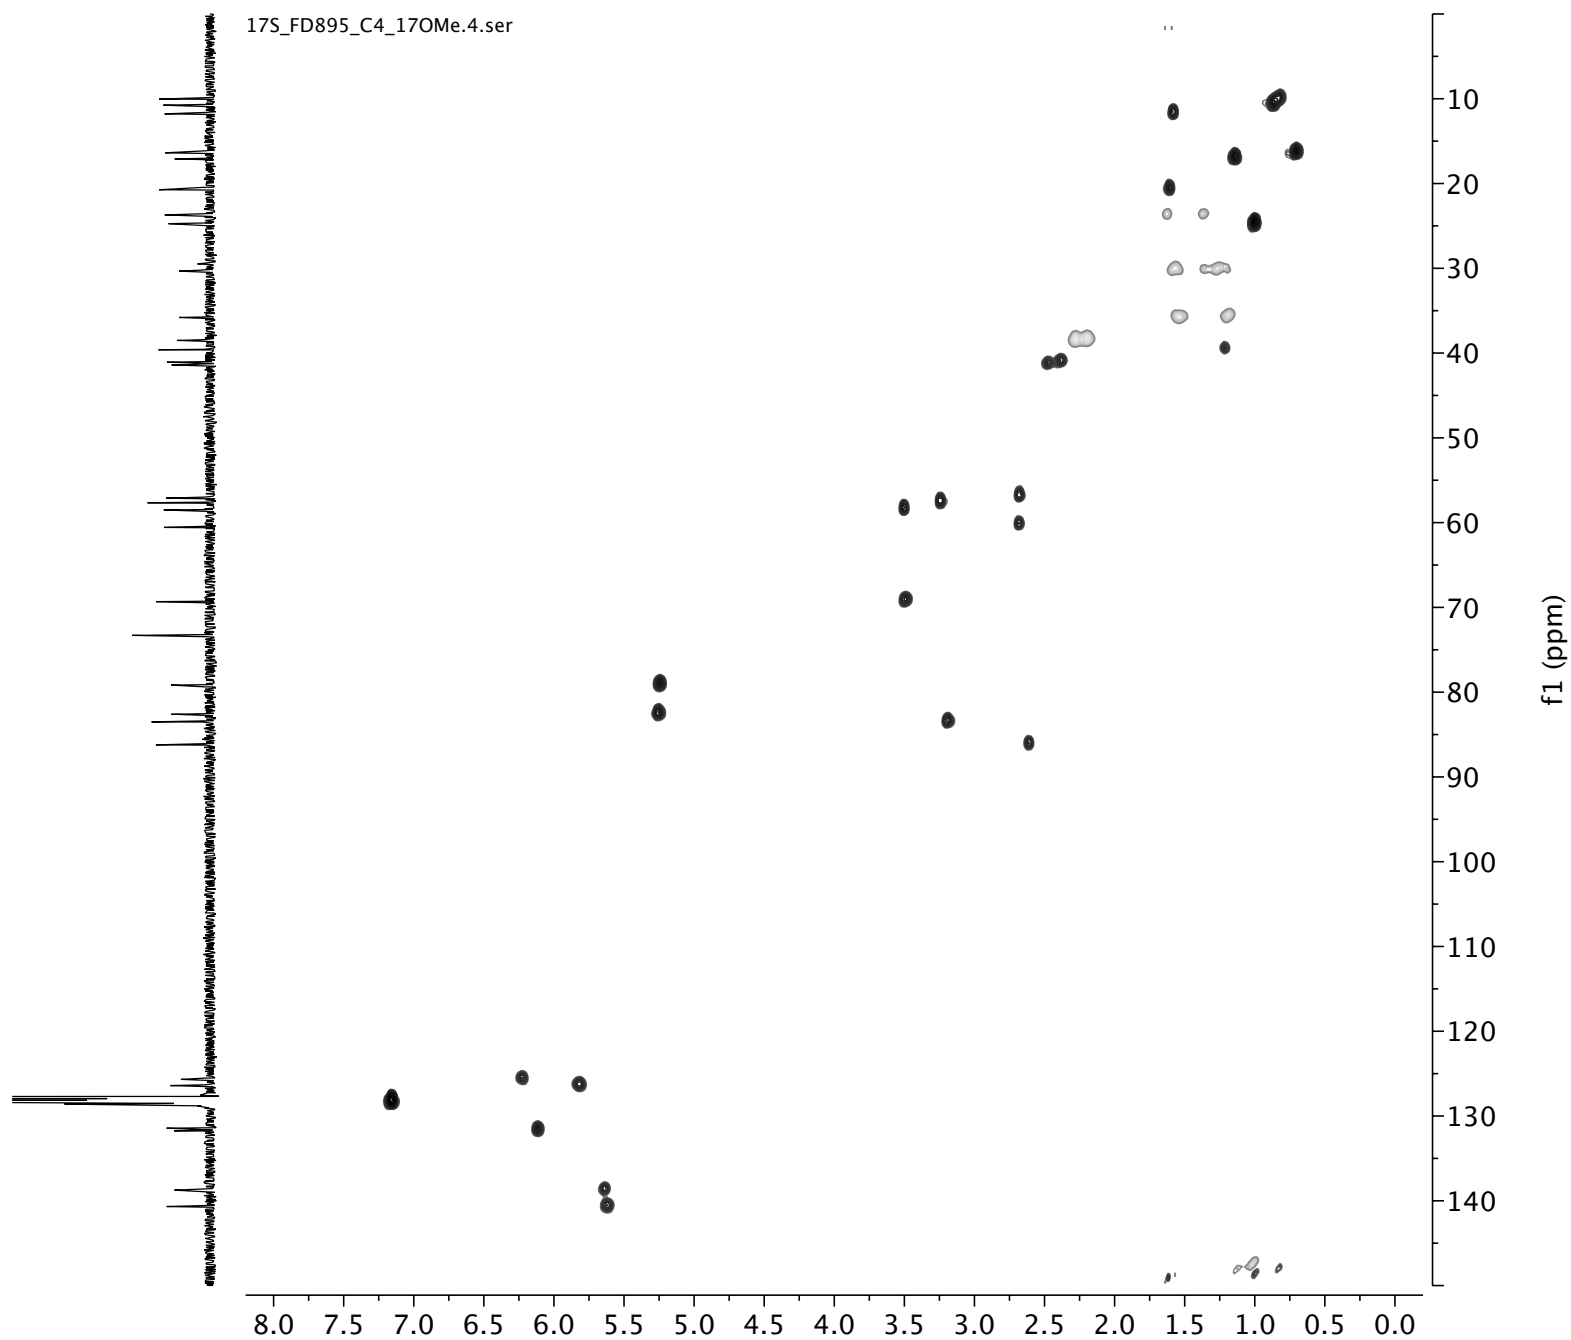

$^1\text{H}, ^{13}\text{C}$ -HMBC (600 MHz) spectrum of 17-O-methyl-FD-895 (**1e**) in  $\text{C}_6\text{D}_6$

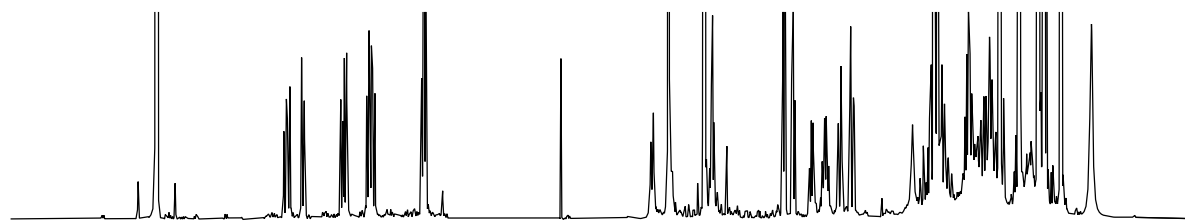

17SOMethyl\_FD895\_pure\_hmbc\_benzene  
Std proton

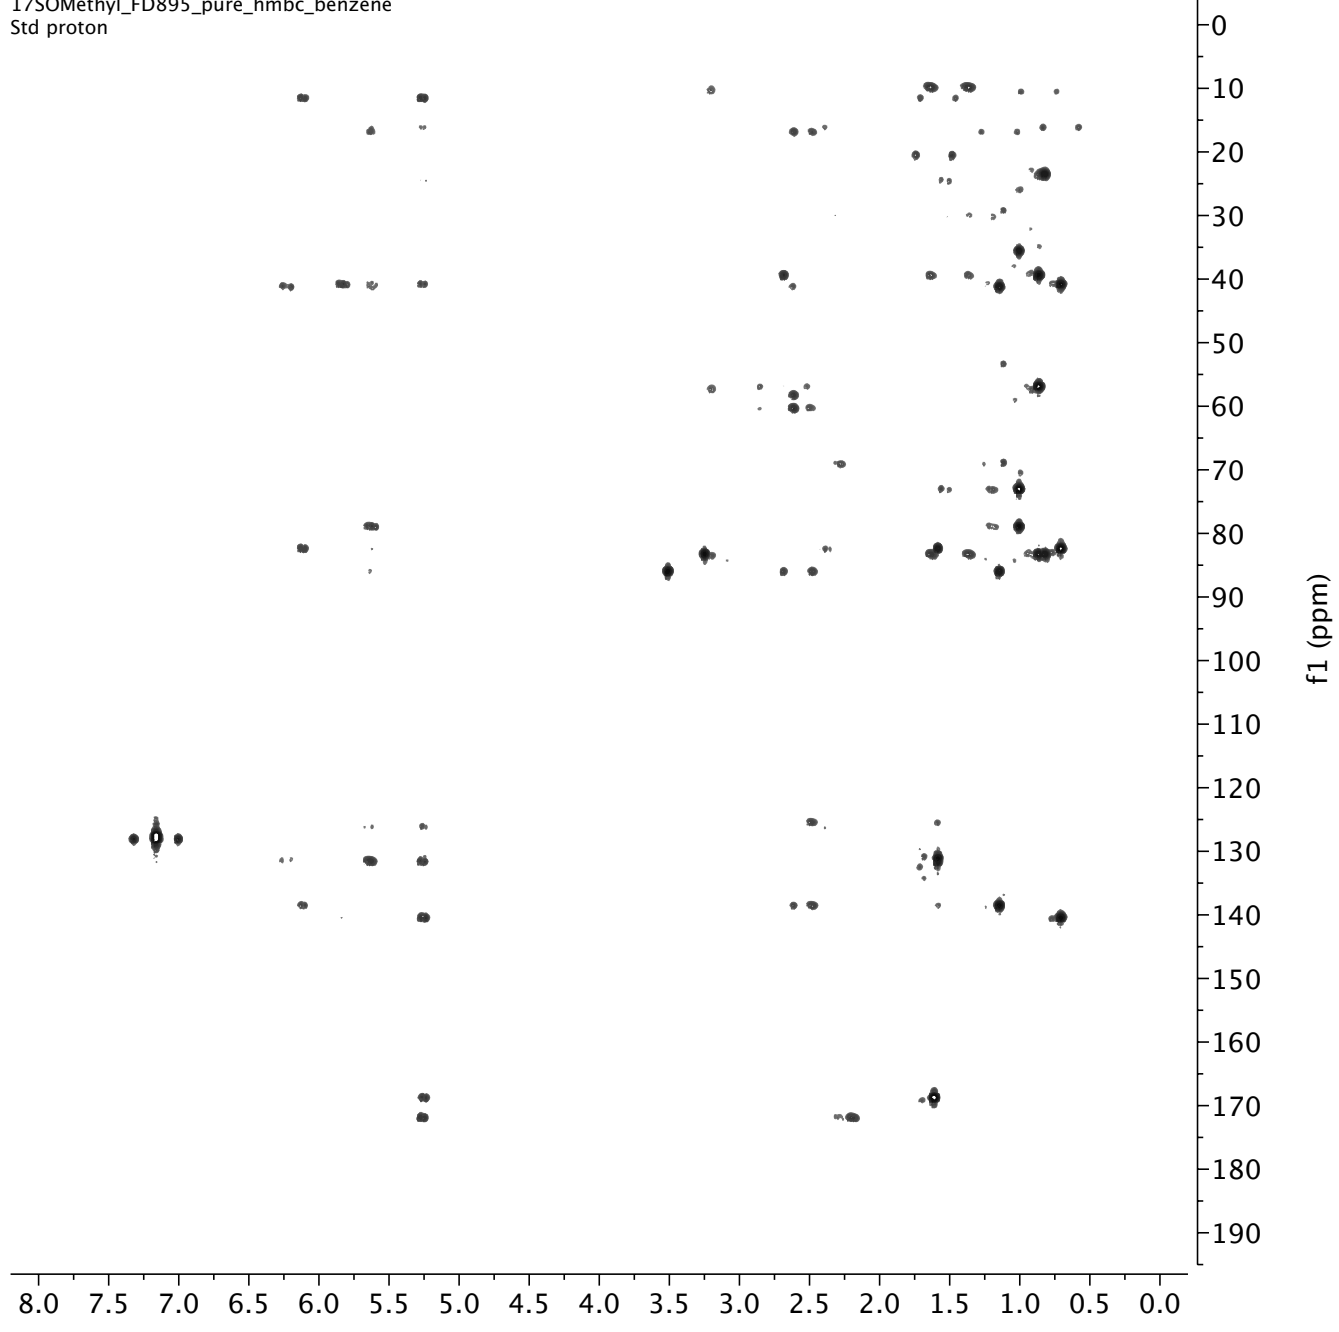

$^1\text{H}$ -NMR (600 MHz) and  $^{13}\text{C}$ -NMR (125 MHz) spectra of 17-O-methyl-17S-FD-895 (**1f**) in  $\text{C}_6\text{D}_6$

17S\_FD895\_K4\_17MeO.2.fid

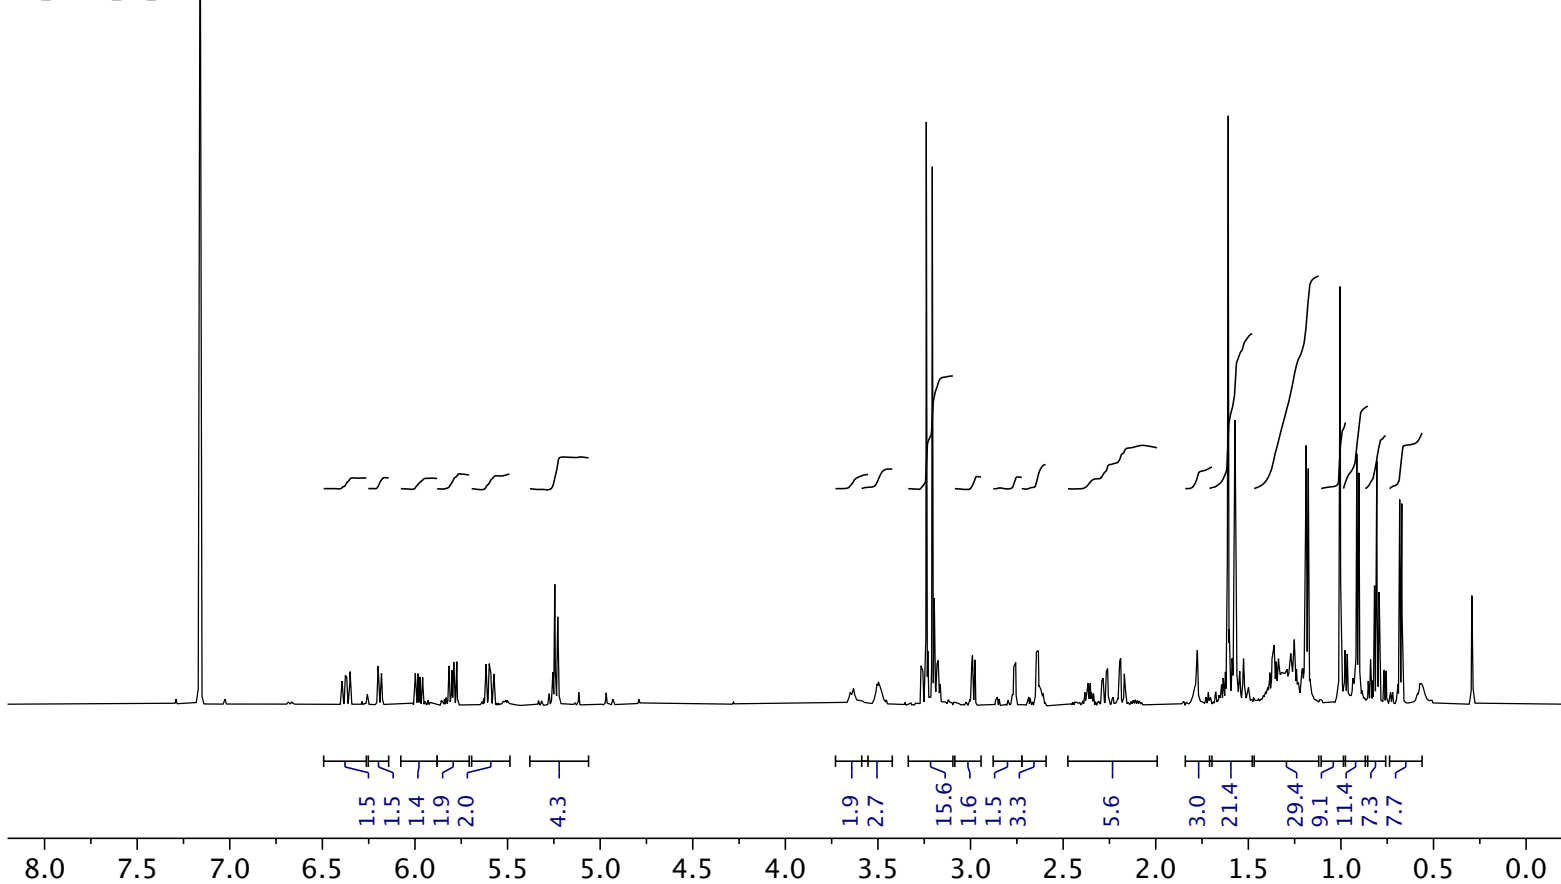

17S\_17MeFD895\_WC\_13Cb  
Std carbon

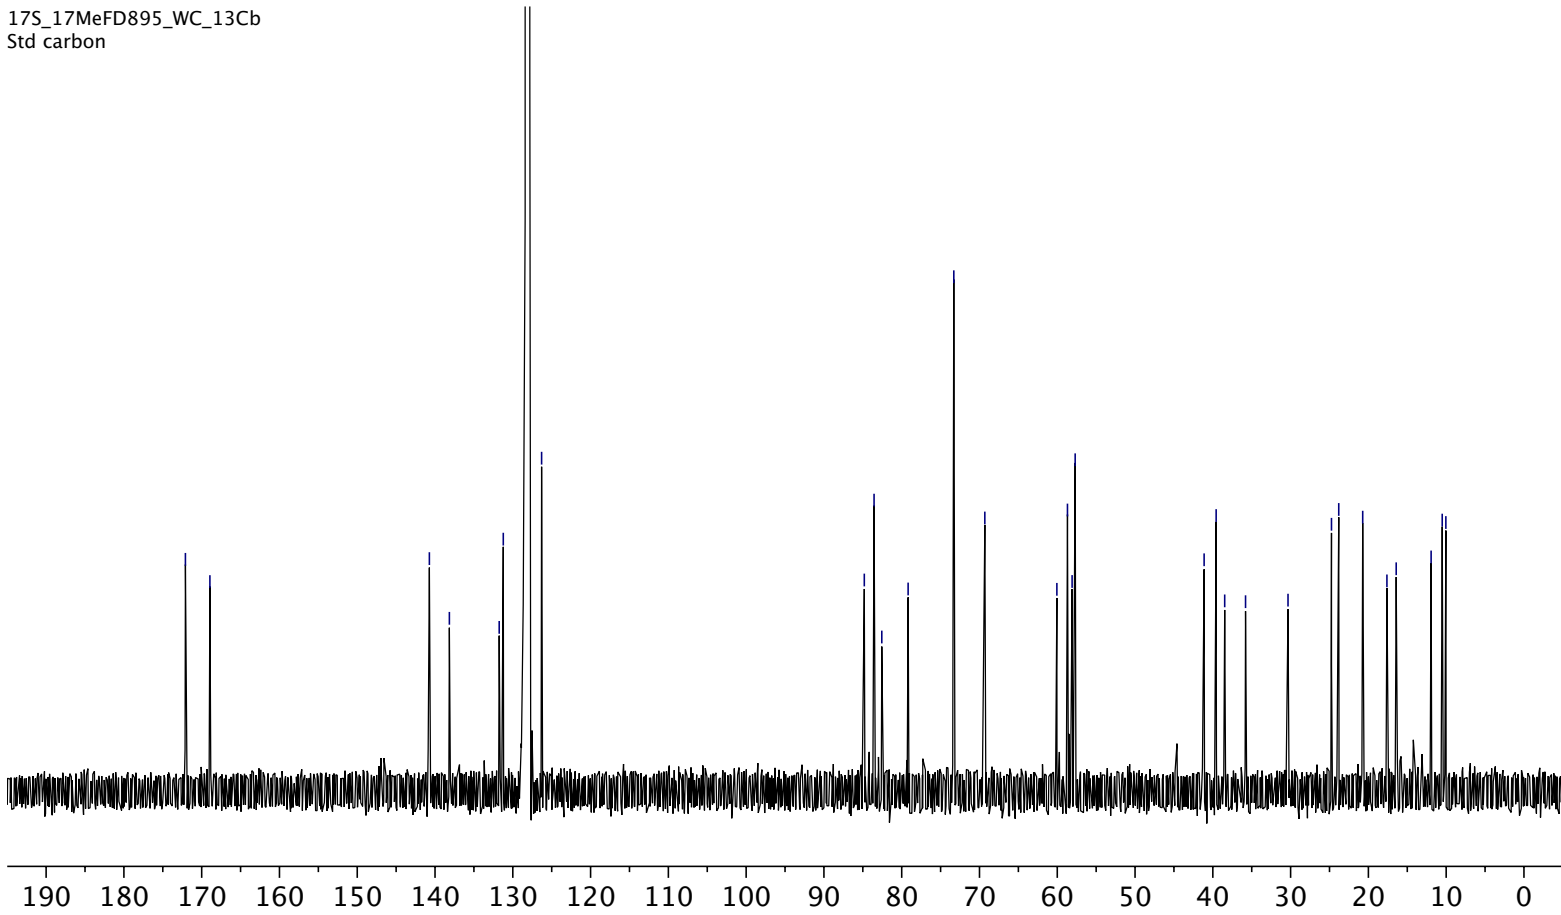



$^1\text{H}, ^1\text{H}$ -COSY (500 MHz) spectrum of 17-O-methyl-17S-FD-895 (**1f**) in  $\text{C}_6\text{D}_6$

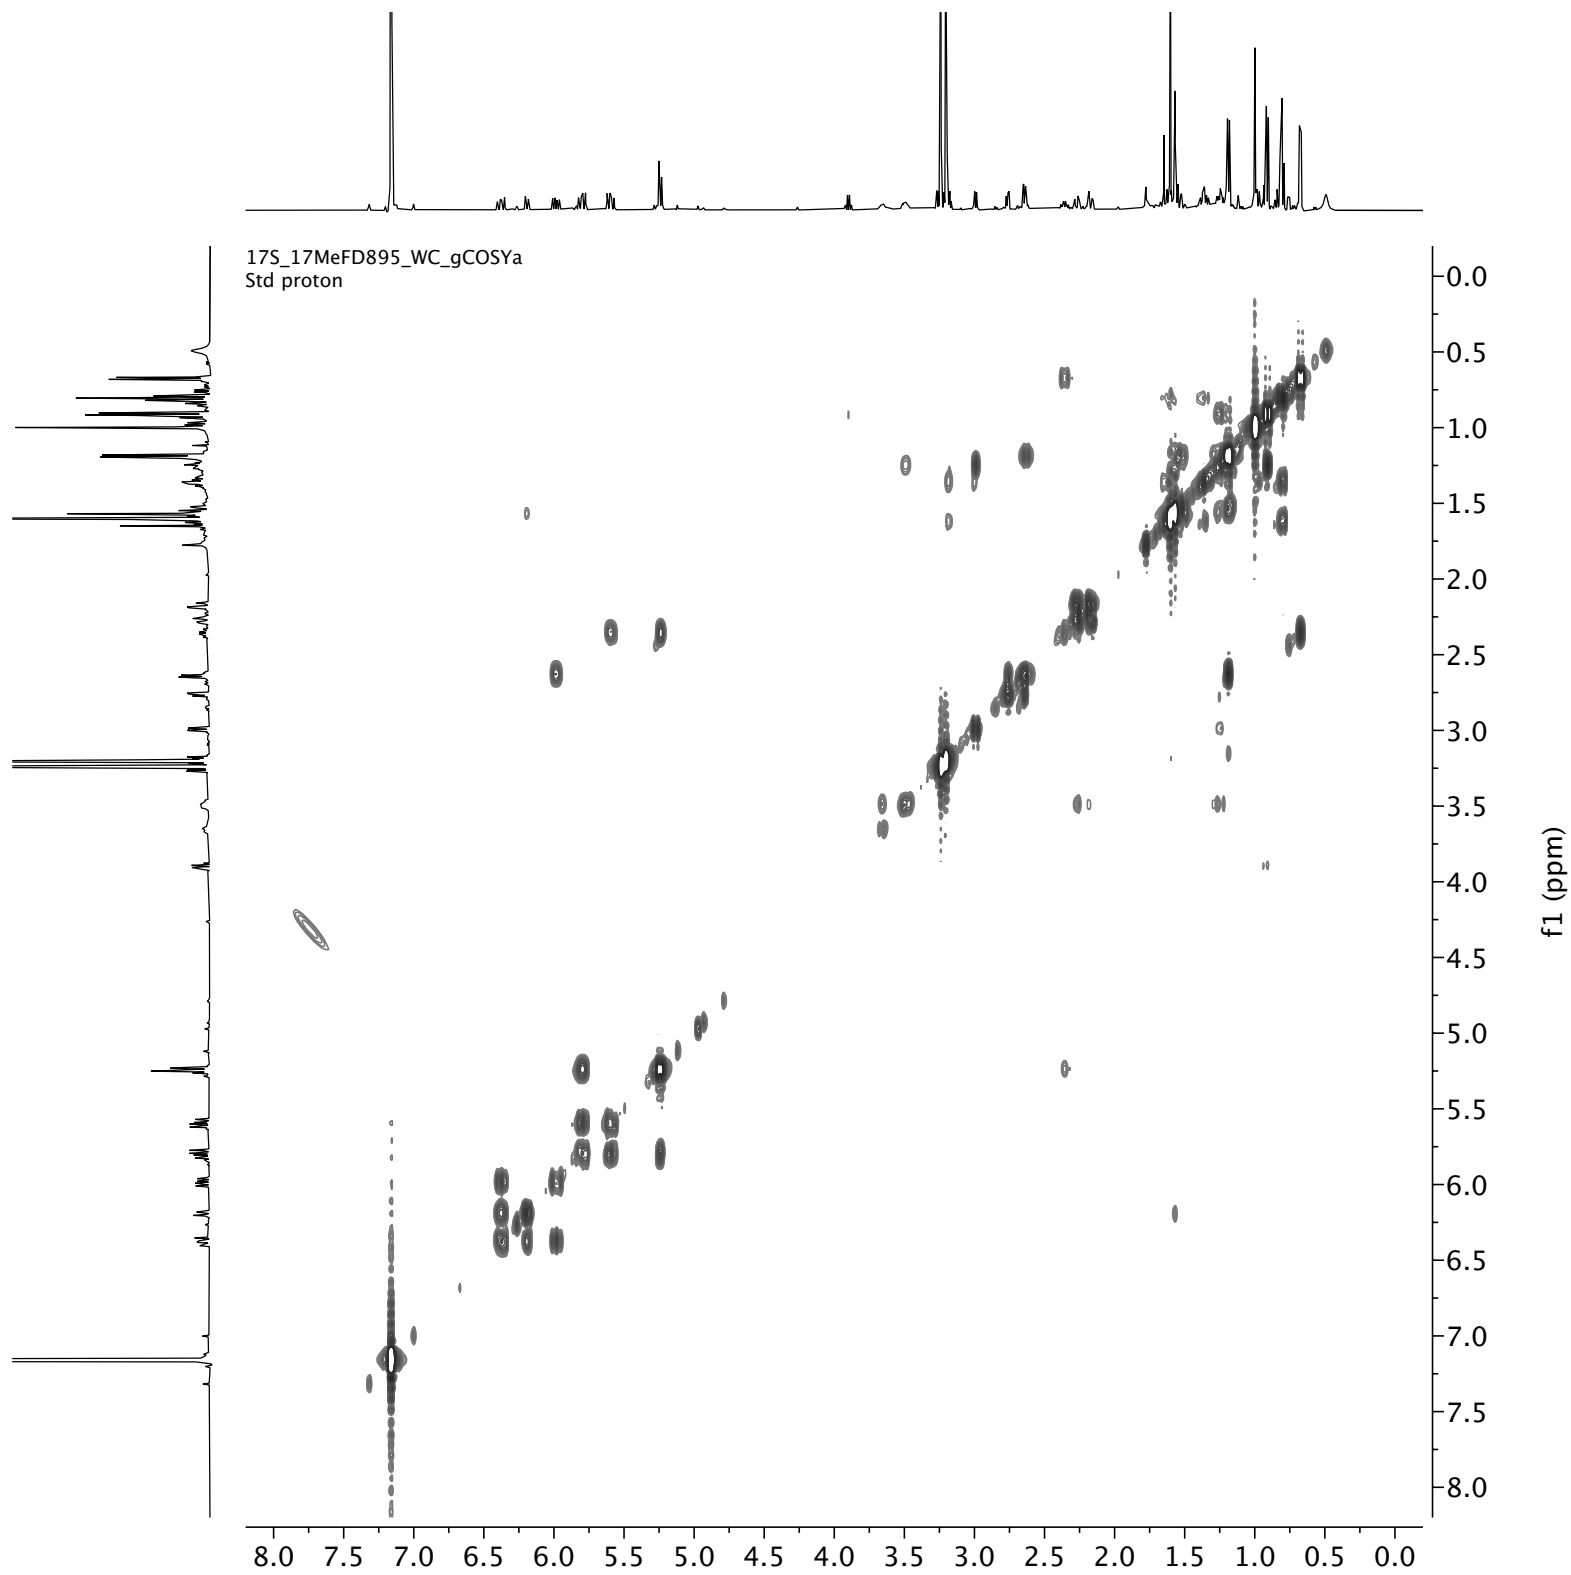

$^1\text{H}$ ,  $^1\text{H}$ -NOESY (500 MHz) spectrum of 17-O-methyl-17S-FD-895 (**1f**) in  $\text{C}_6\text{D}_6$

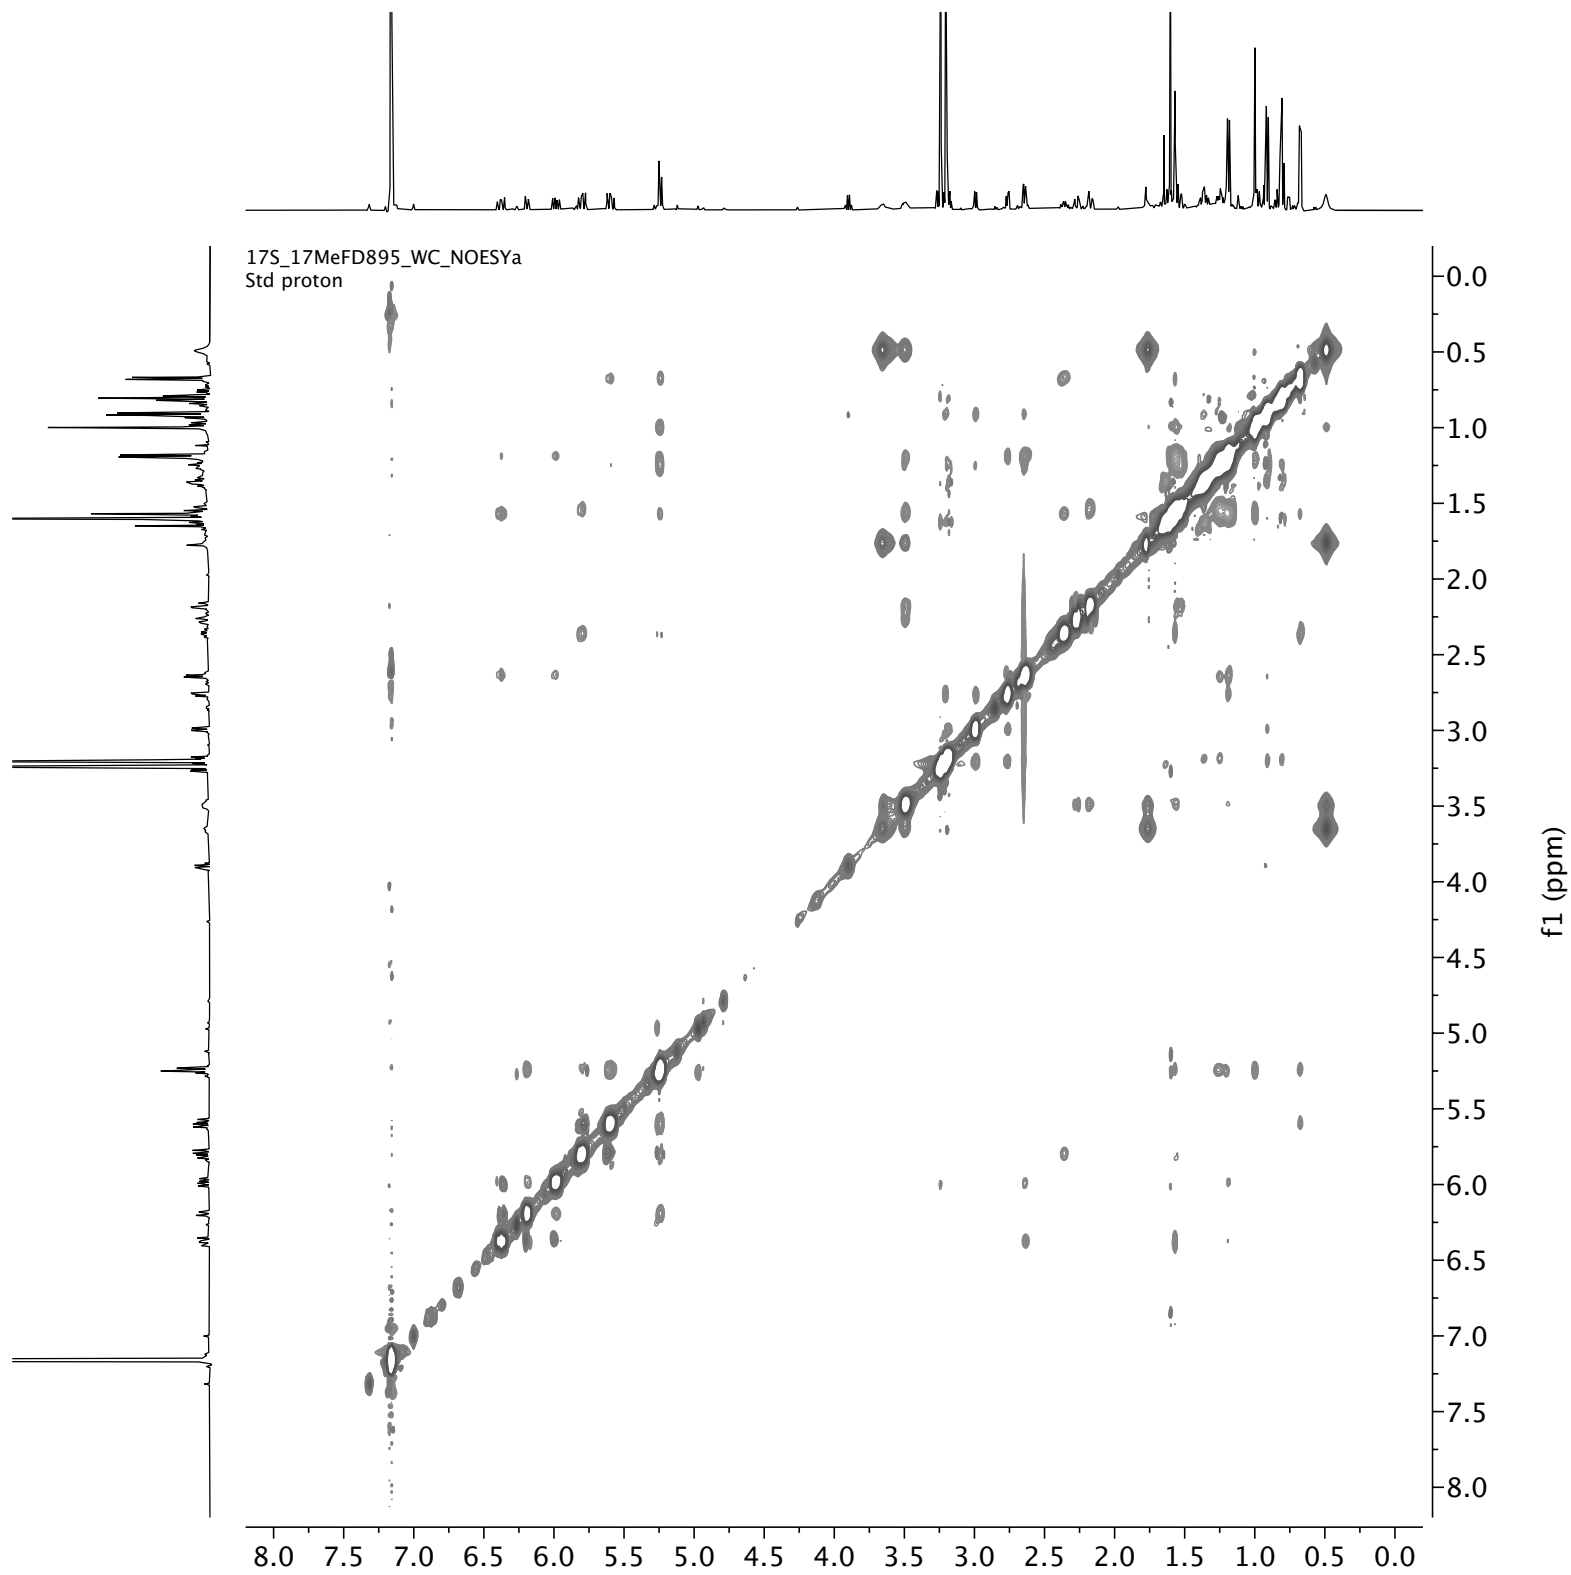

$^1\text{H}, ^{13}\text{C}$ -HSQC (500 MHz) spectrum of 17-O-methyl-17S-FD-895 (**1f**) in  $\text{C}_6\text{D}_6$

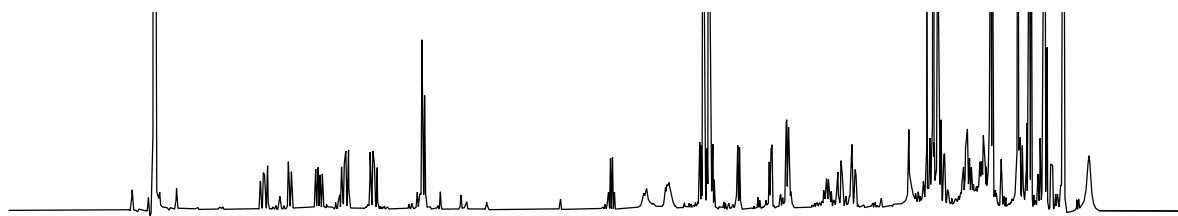

17S\_17MeFD895\_WC\_HSQCa  
Std proton

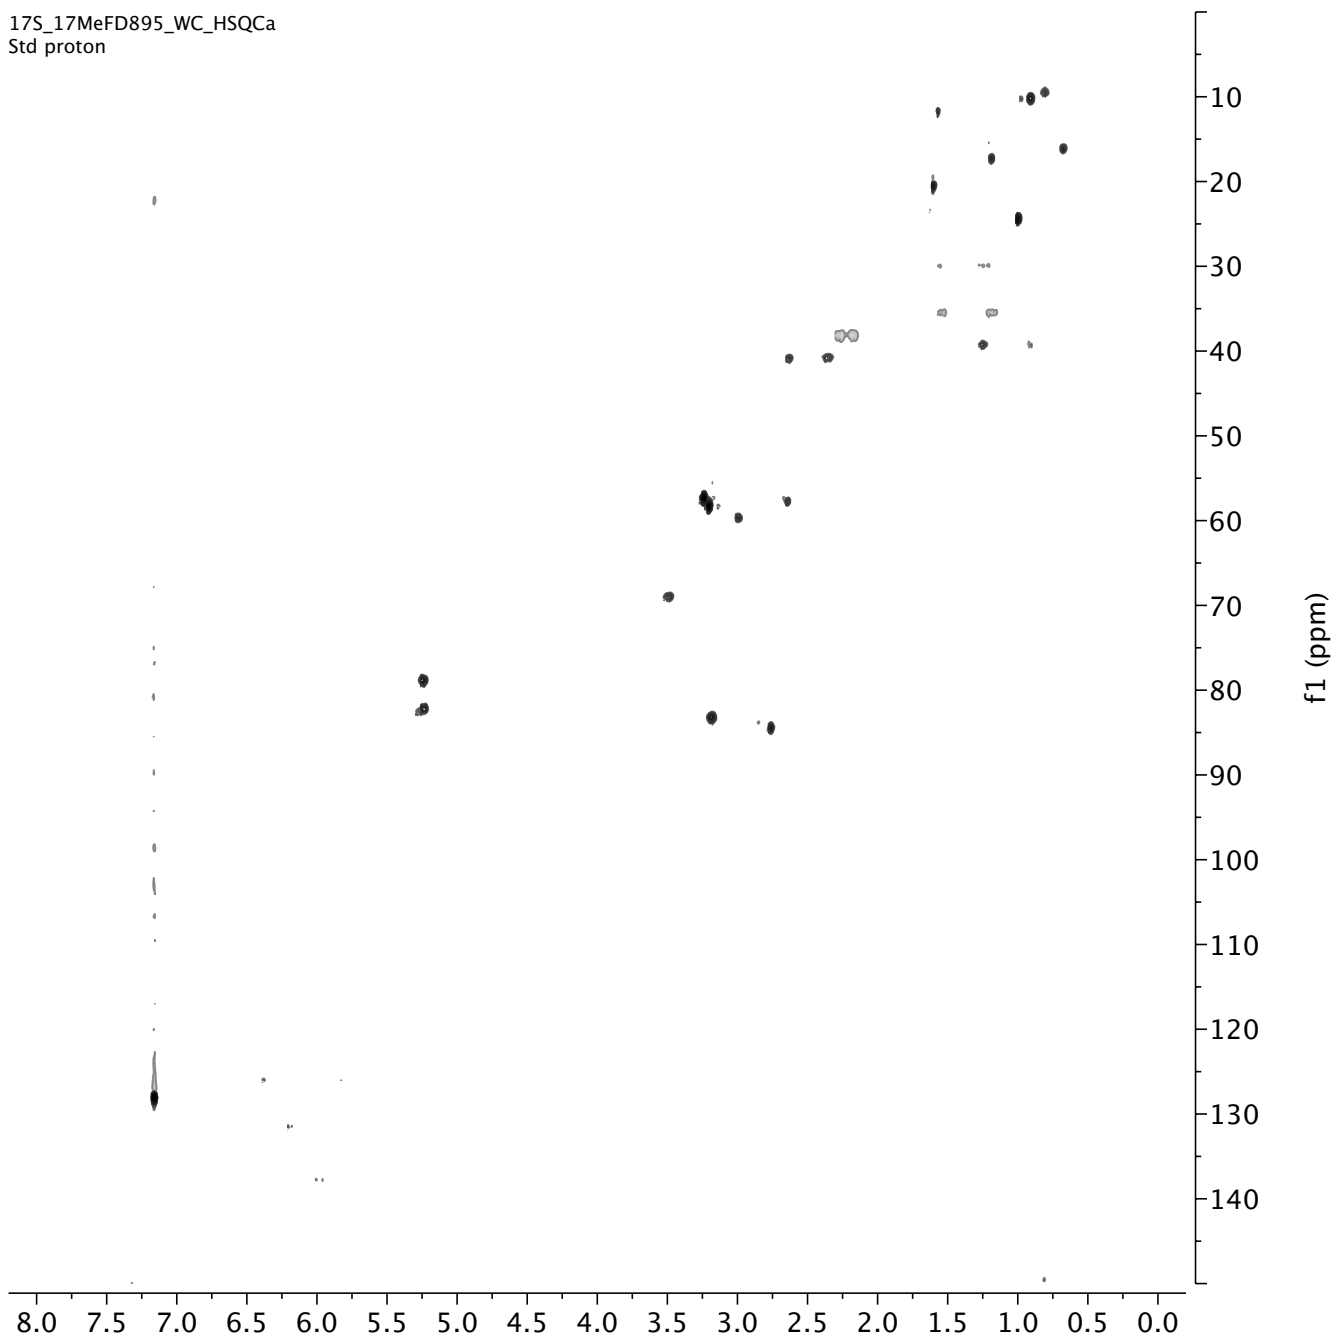

$^1\text{H}, ^{13}\text{C}$ -HMBC (500 MHz) spectrum of 17-O-methyl-17S-FD-895 (**1f**) in  $\text{C}_6\text{D}_6$

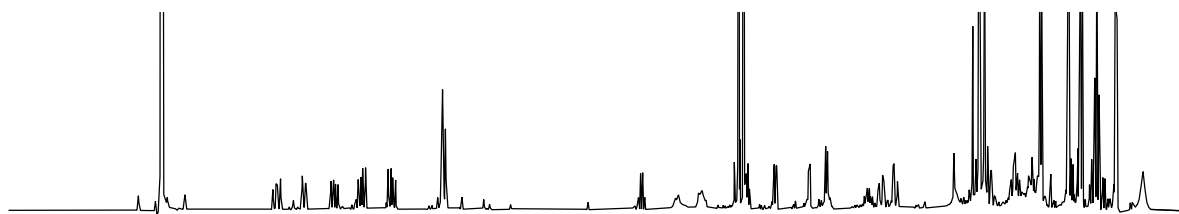

17S\_17MeFD895\_WC\_HMBCa  
Std proton

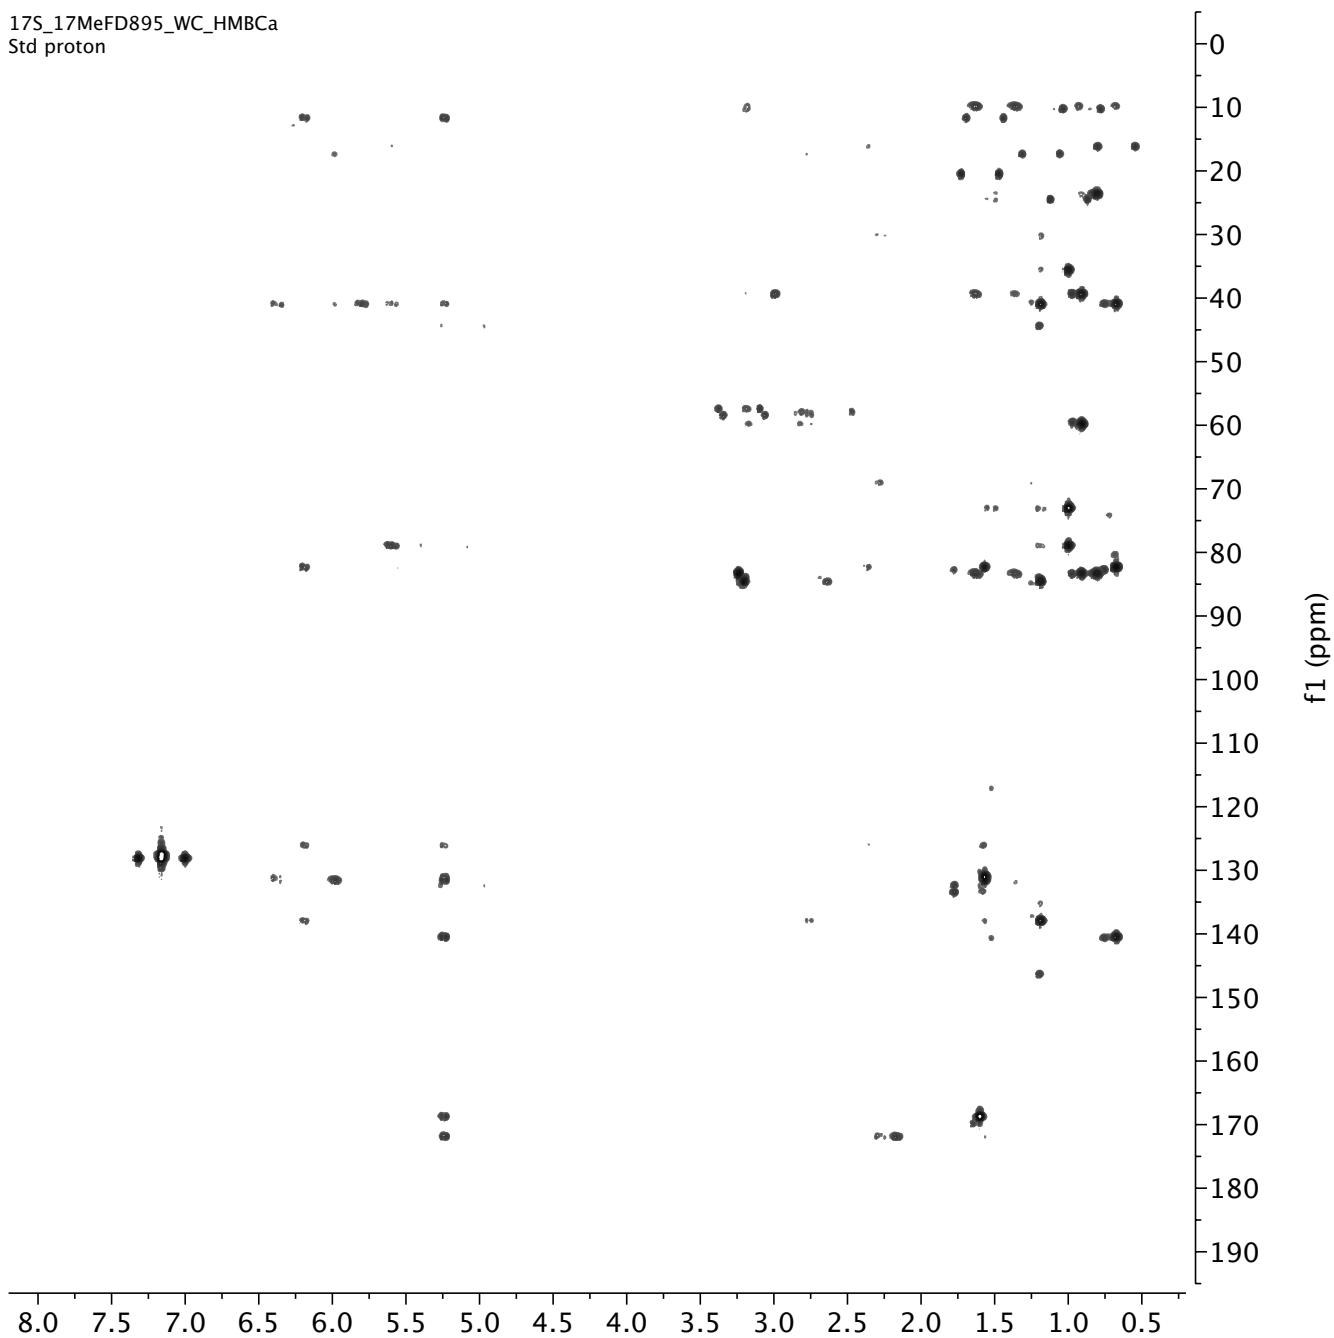

$^1\text{H}$ -NMR (600 MHz) and  $^{13}\text{C}$ -NMR (125 MHz) spectra of 3S,17S-FD-895 (**1g**) in  $\text{C}_6\text{D}_6$

17S\_FD895\_G4\_C3C17.7.fid

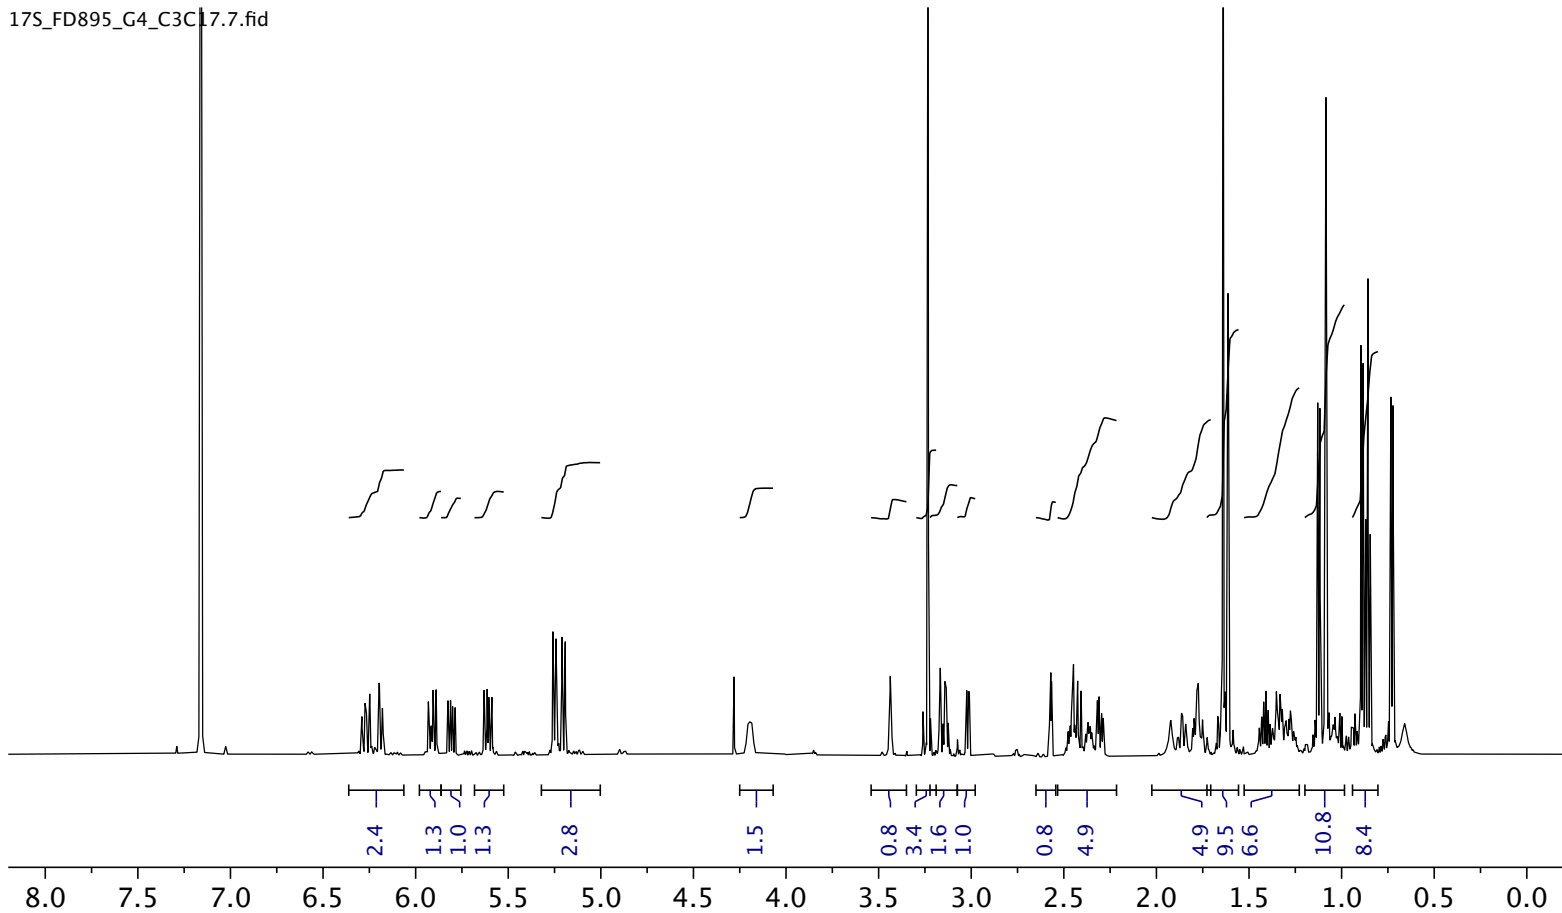

3S\_17SFD895\_carbon\_benzene\_USETHIS  
Std carbon

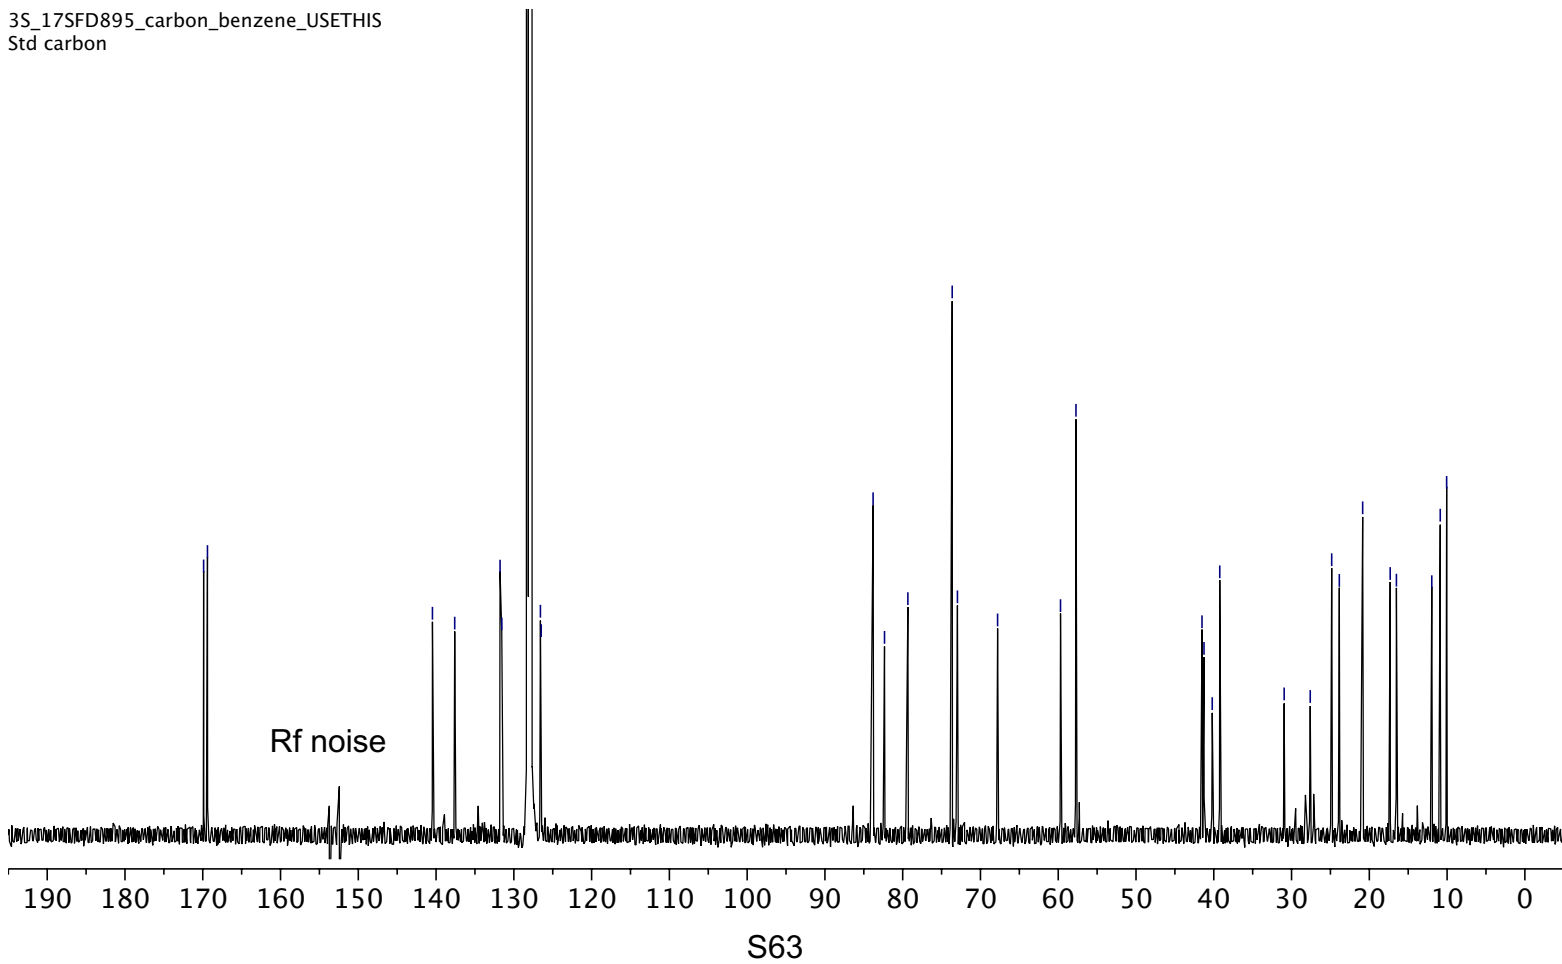

$^1\text{H}, ^1\text{H}$ -COSY (600 MHz) spectrum of 3*S*,17*S*-FD-895 (**1g**) in  $\text{C}_6\text{D}_6$

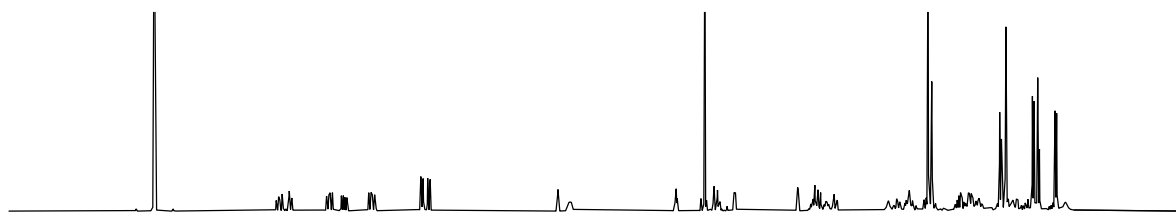

17S\_FD895\_G4\_C3C17.3.ser

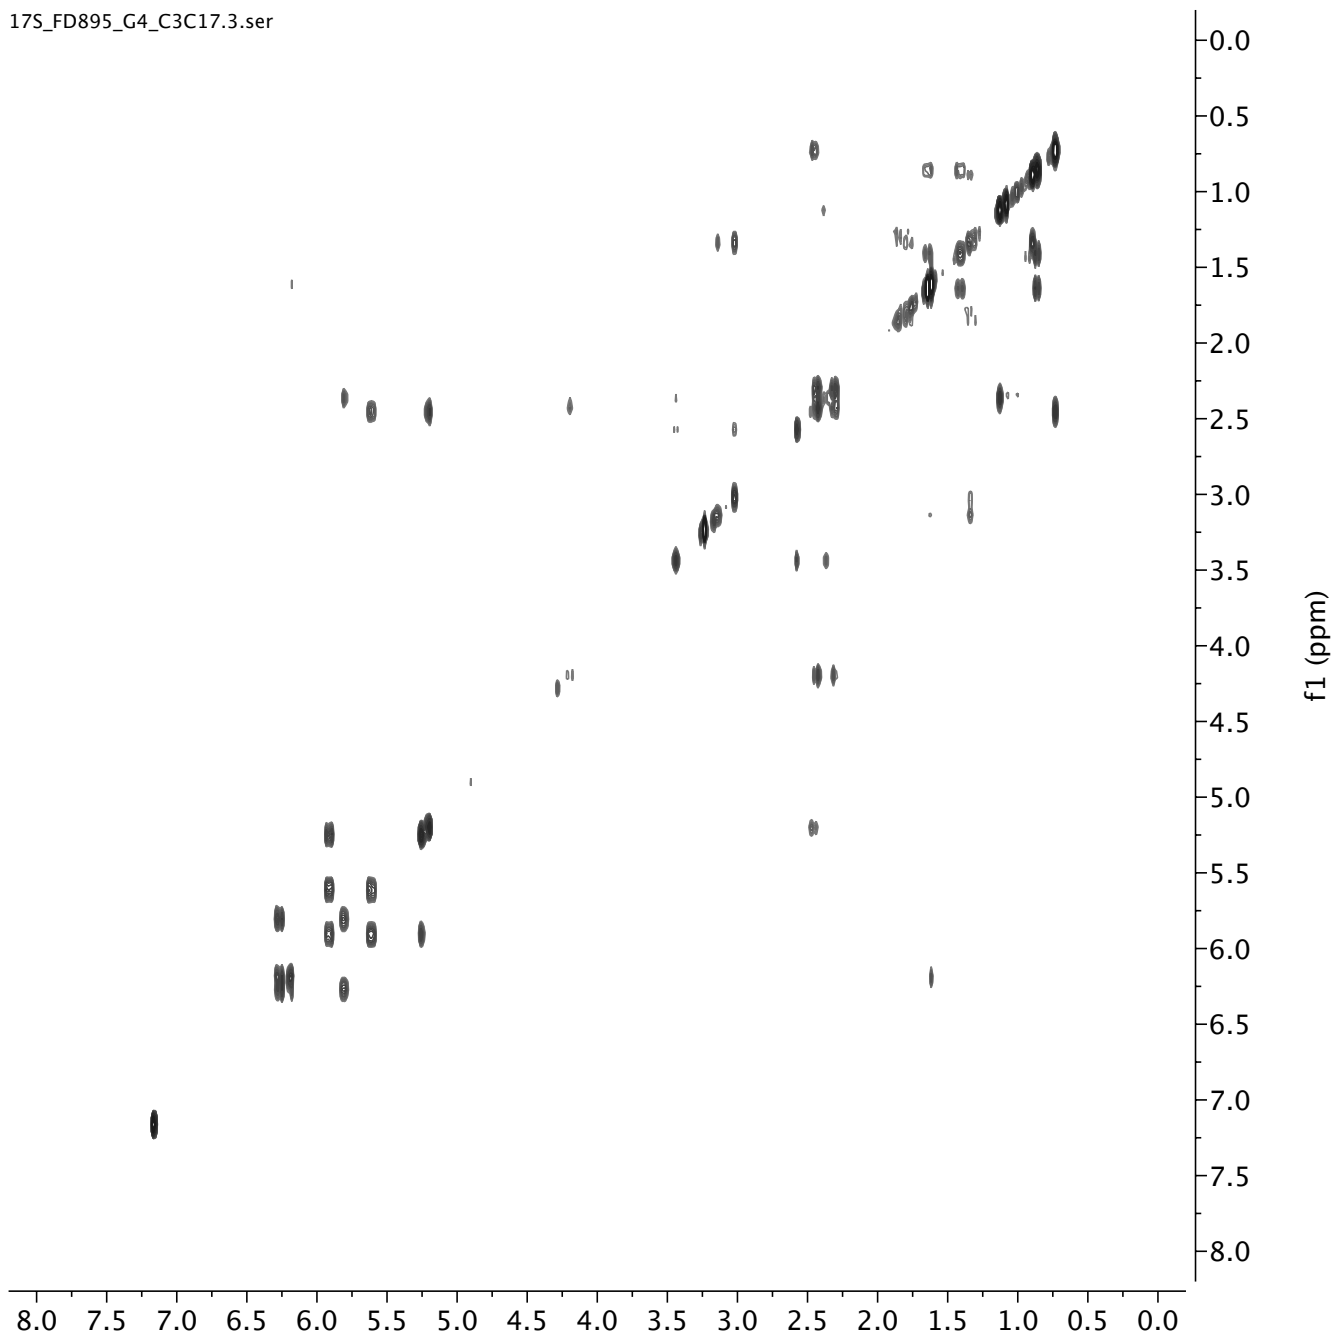

$^1\text{H}$ ,  $^1\text{H}$ -NOESY (600 MHz) spectrum of 3*S*,17*S*-FD-895 (**1g**) in  $\text{C}_6\text{D}_6$

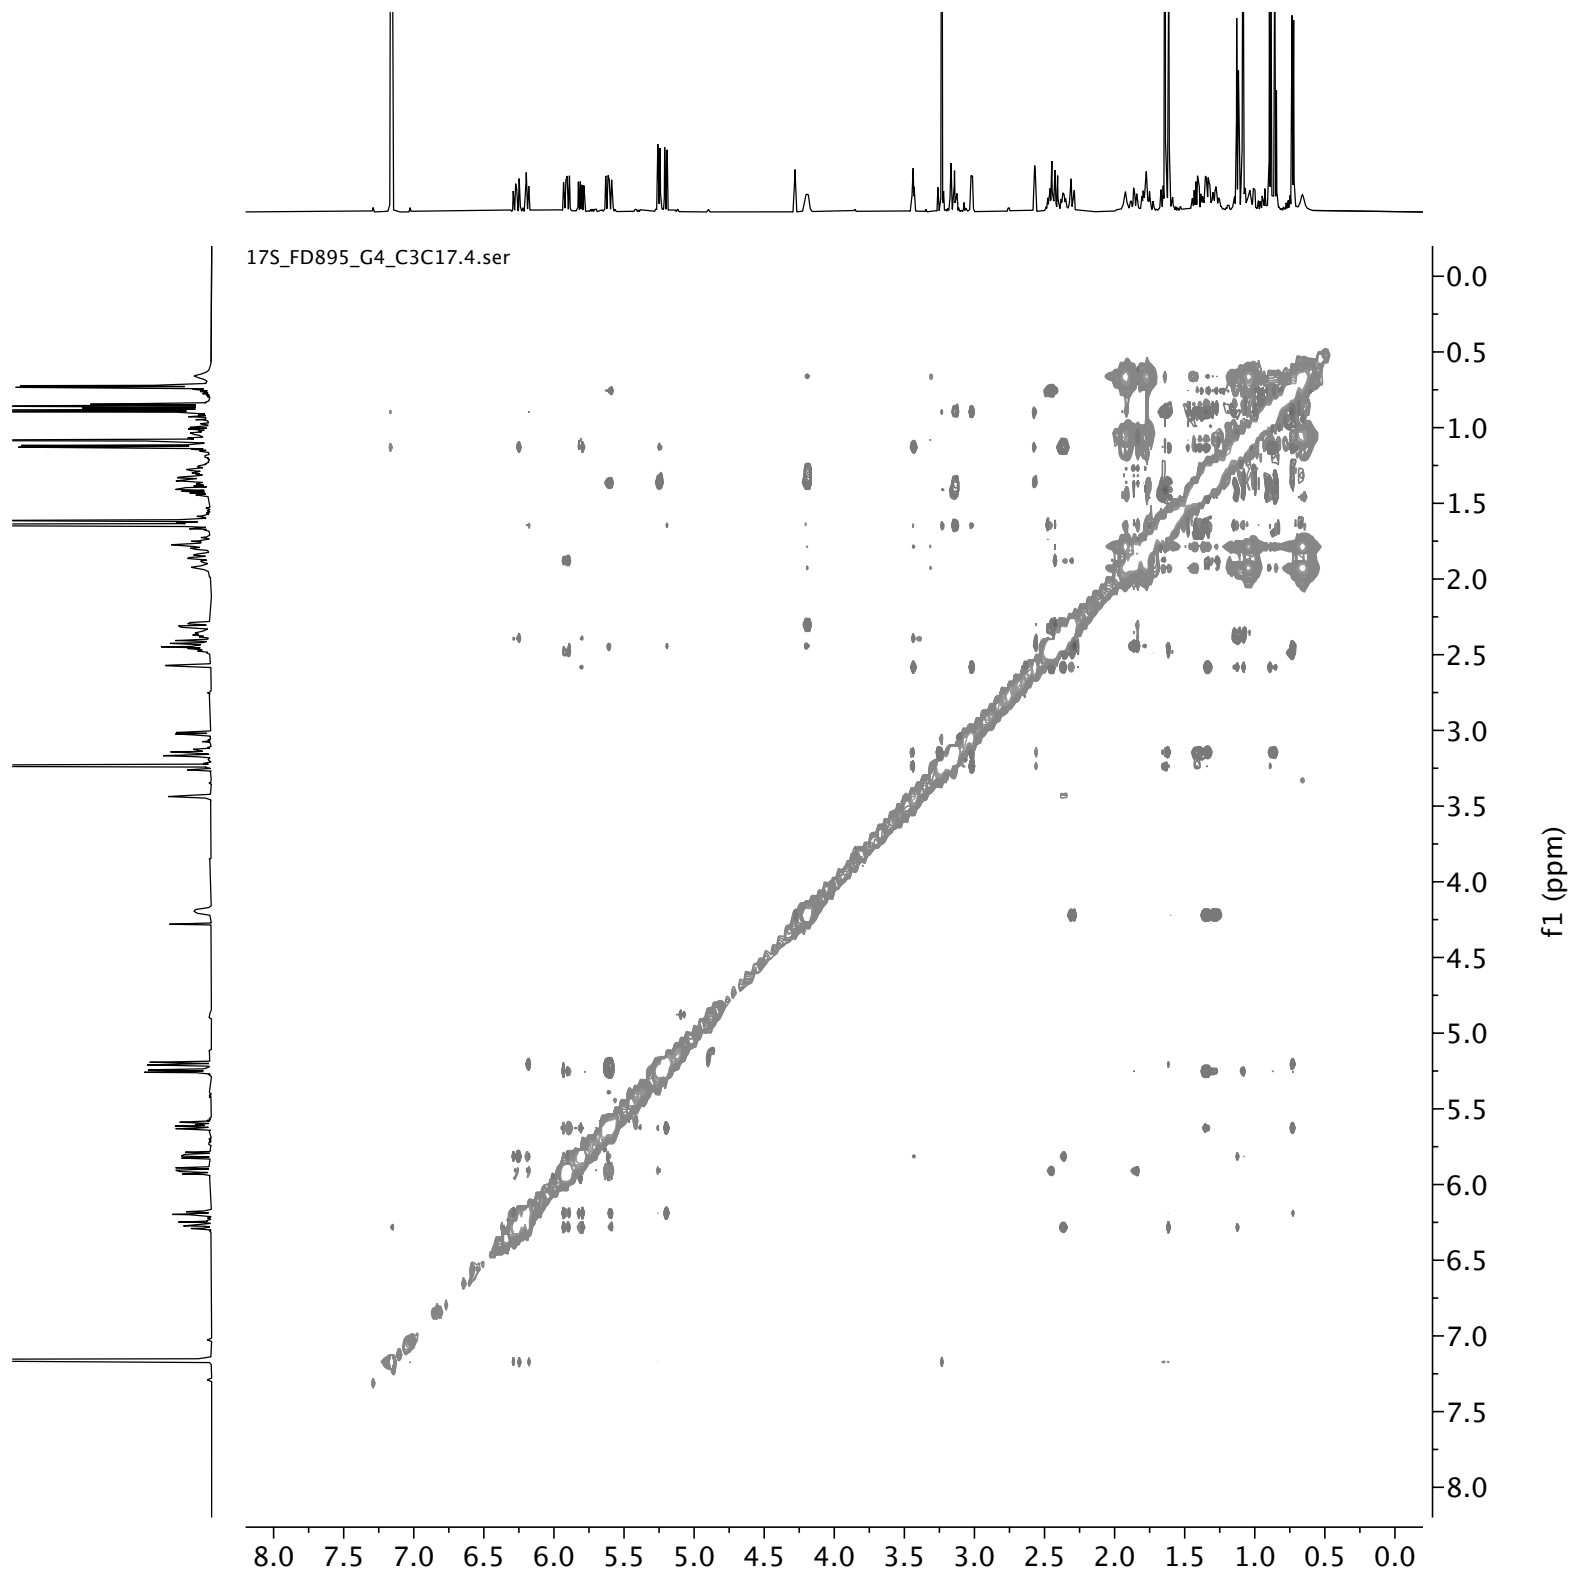

$^1\text{H}, ^{13}\text{C}$ -HSQC (600 MHz) spectrum of 3*S*,17*S*-FD-895 (**1g**) in  $\text{C}_6\text{D}_6$

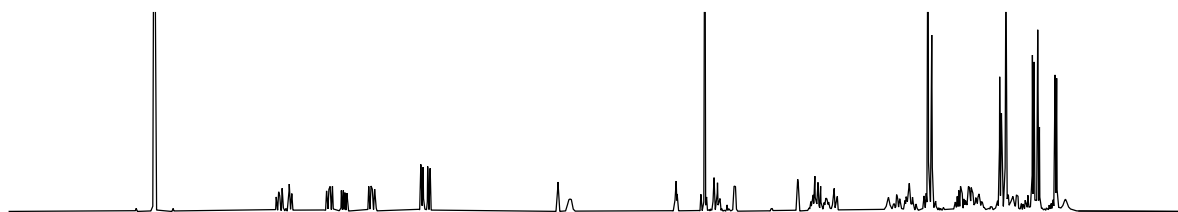

17S\_FD895\_G4\_C3C17.5.ser

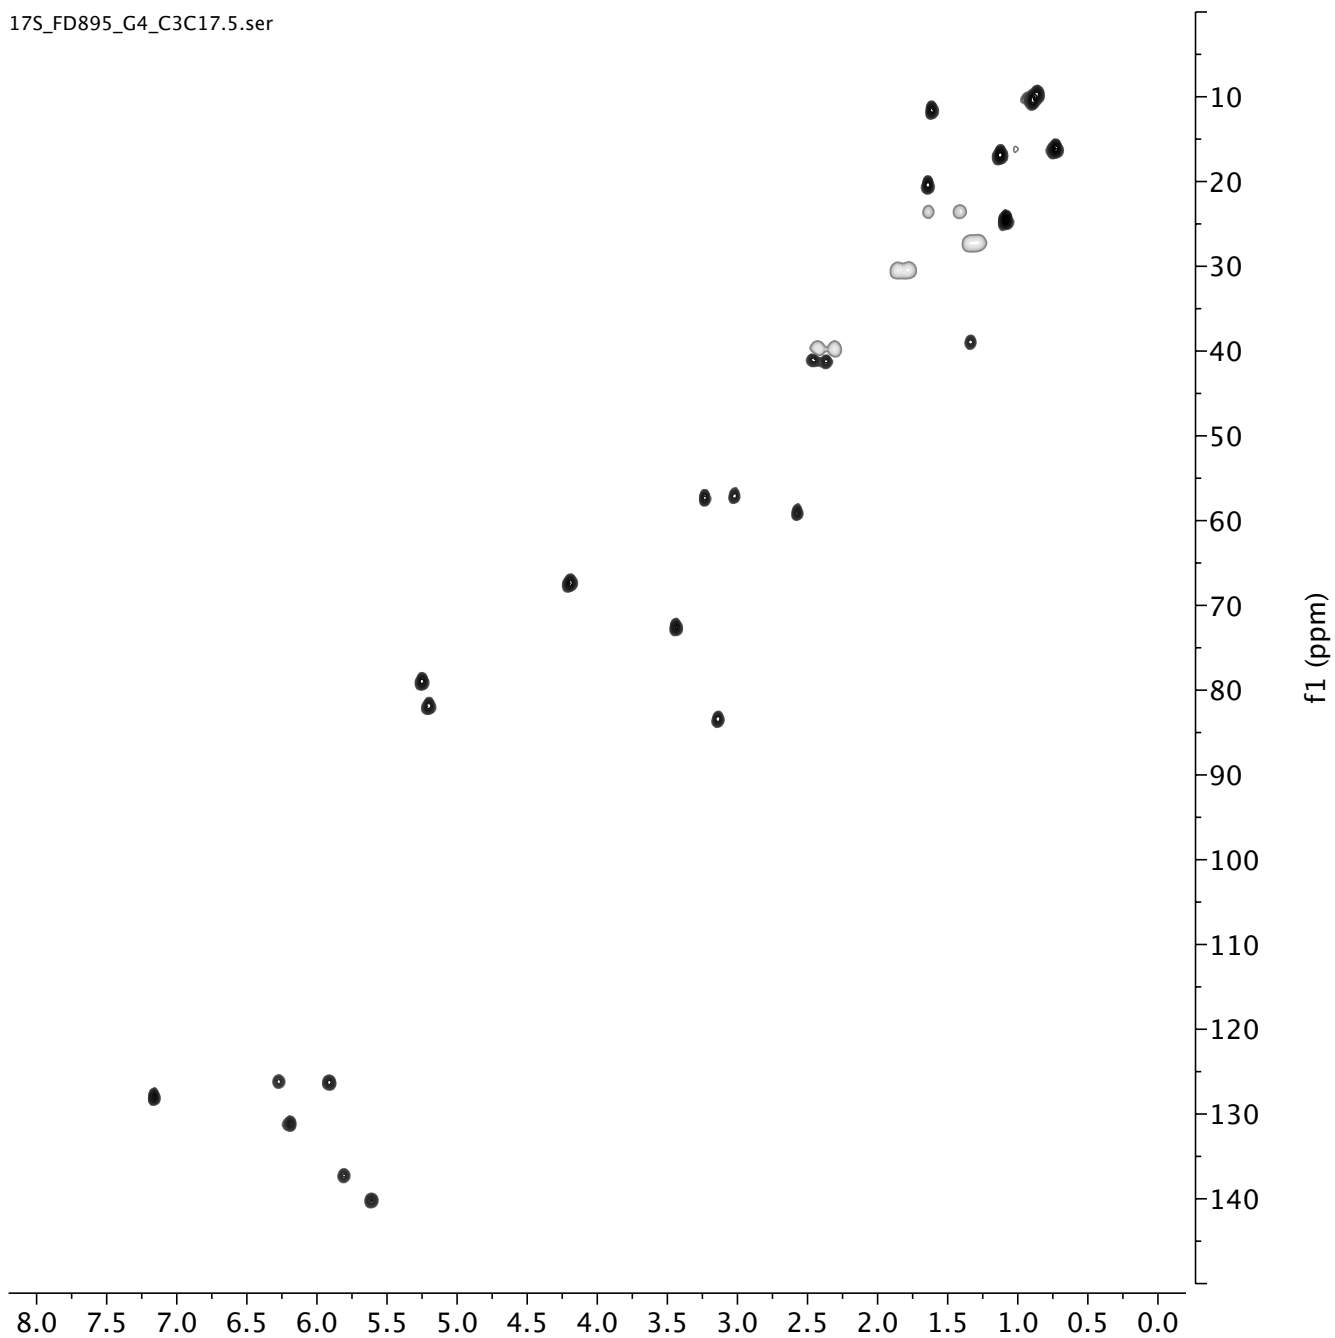



$^1\text{H}, ^{13}\text{C}$ -HMBC (600 MHz) spectrum of 3*S*,17*S*-FD-895 (**1g**) in  $\text{C}_6\text{D}_6$

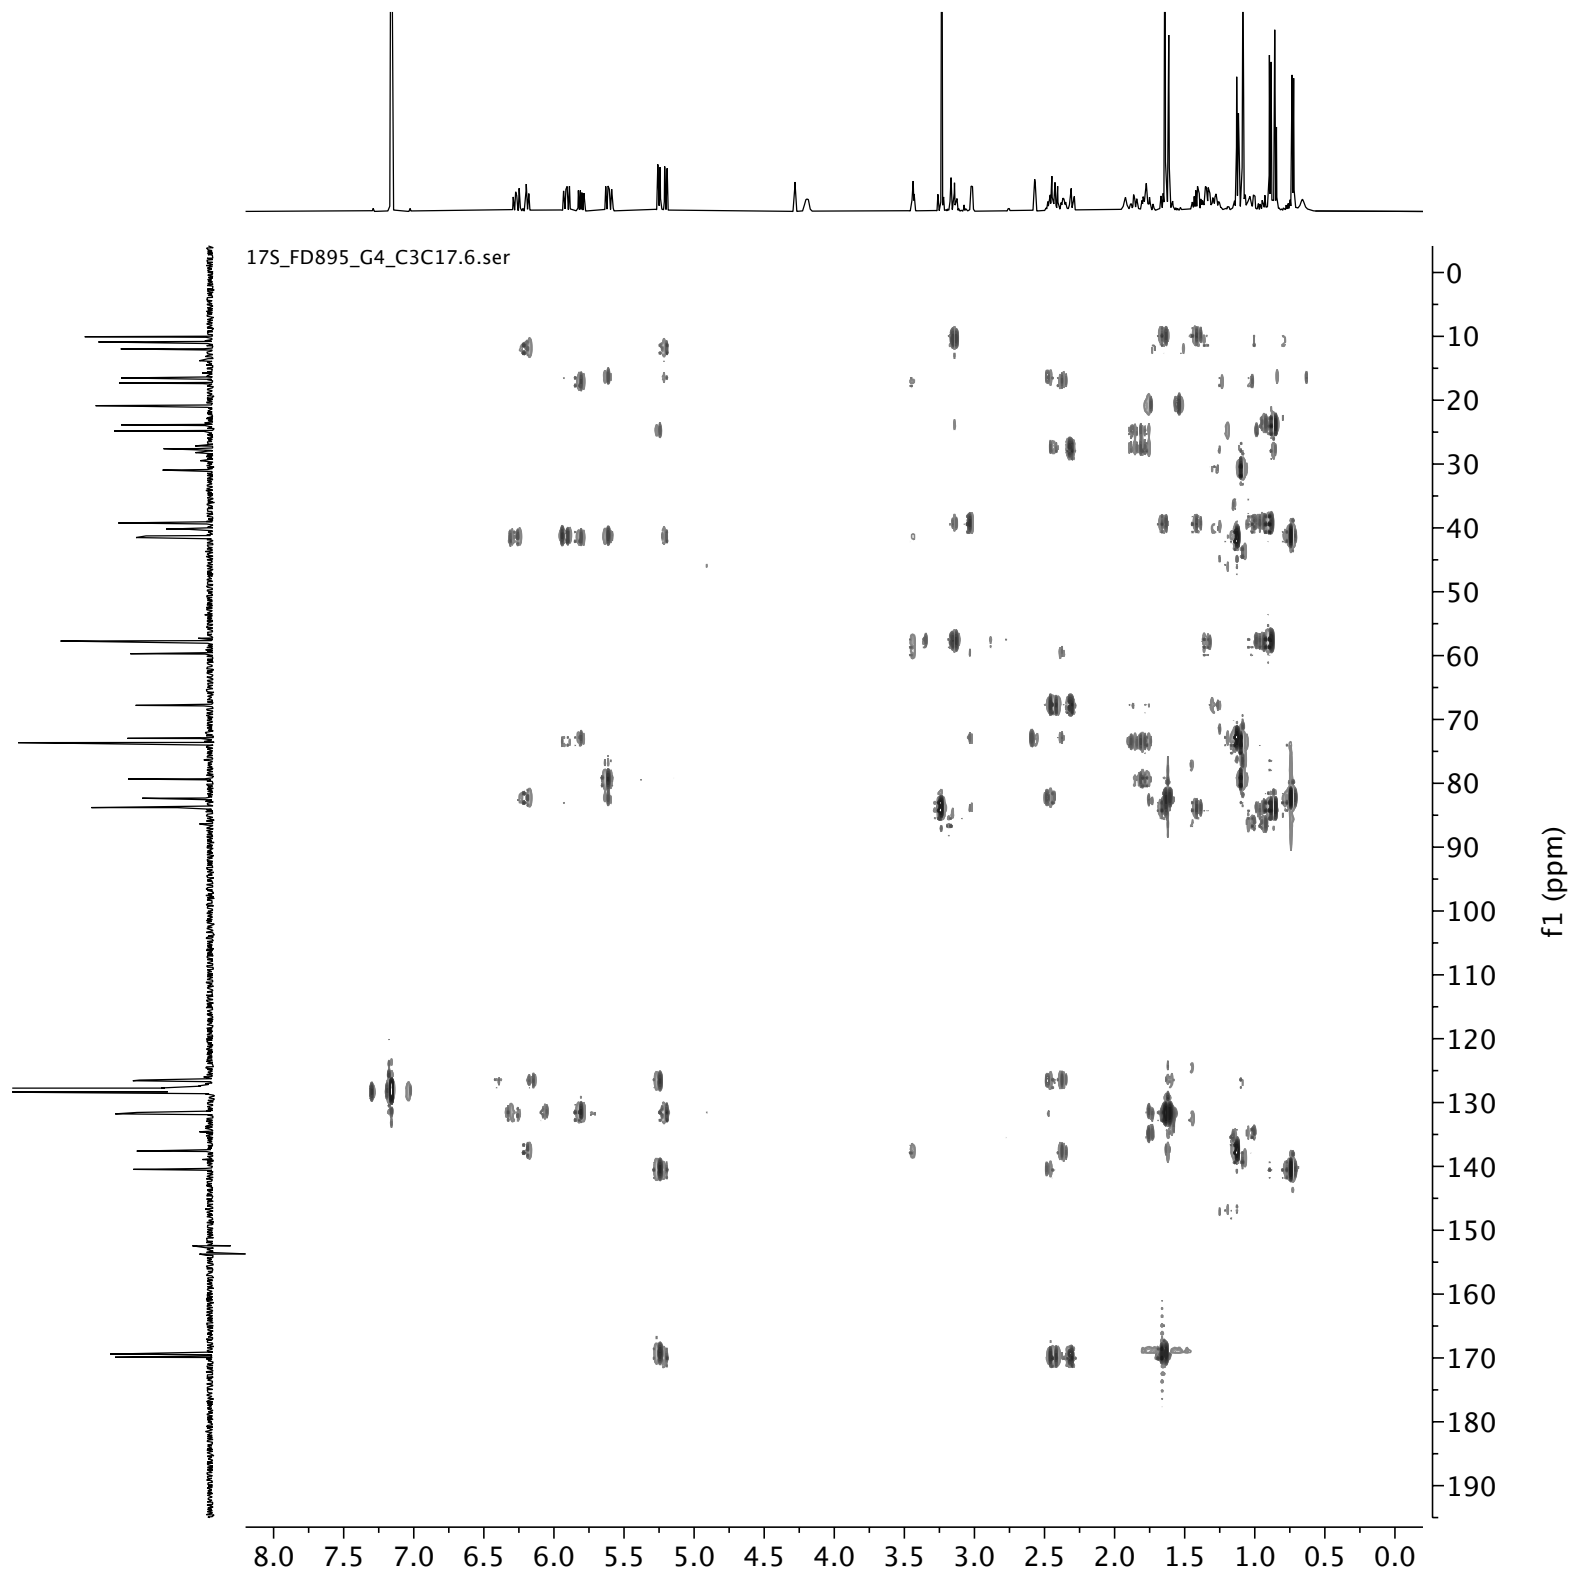

$^1\text{H}$ -NMR (600 MHz) and  $^{13}\text{C}$ -NMR (125 MHz) spectra of 7S,17S-FD-895 (**1h**) in  $\text{C}_6\text{D}_6$

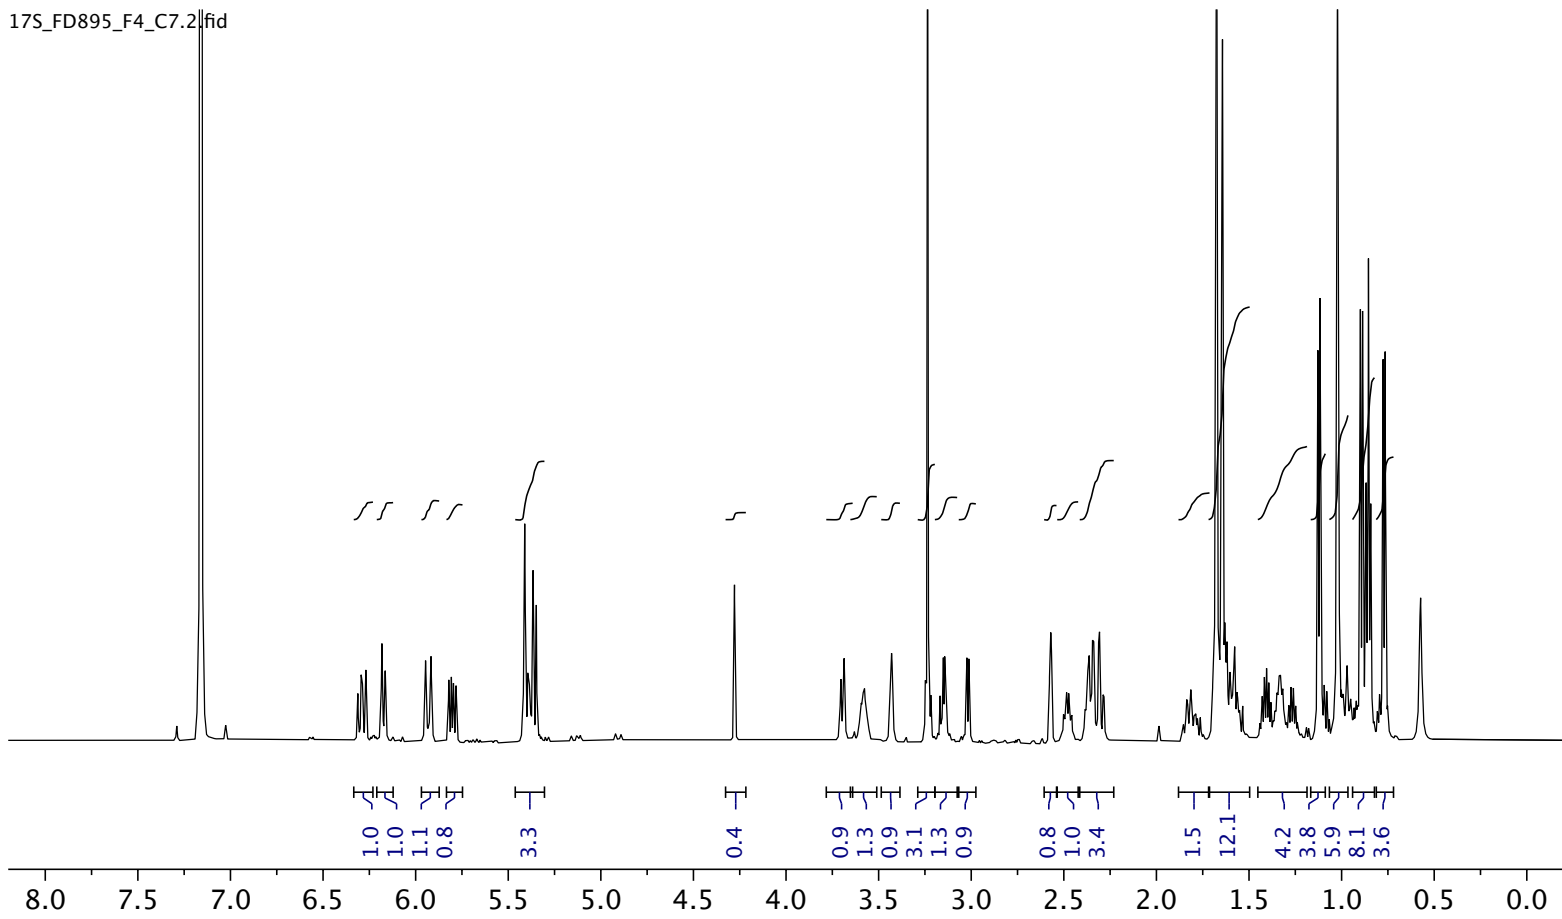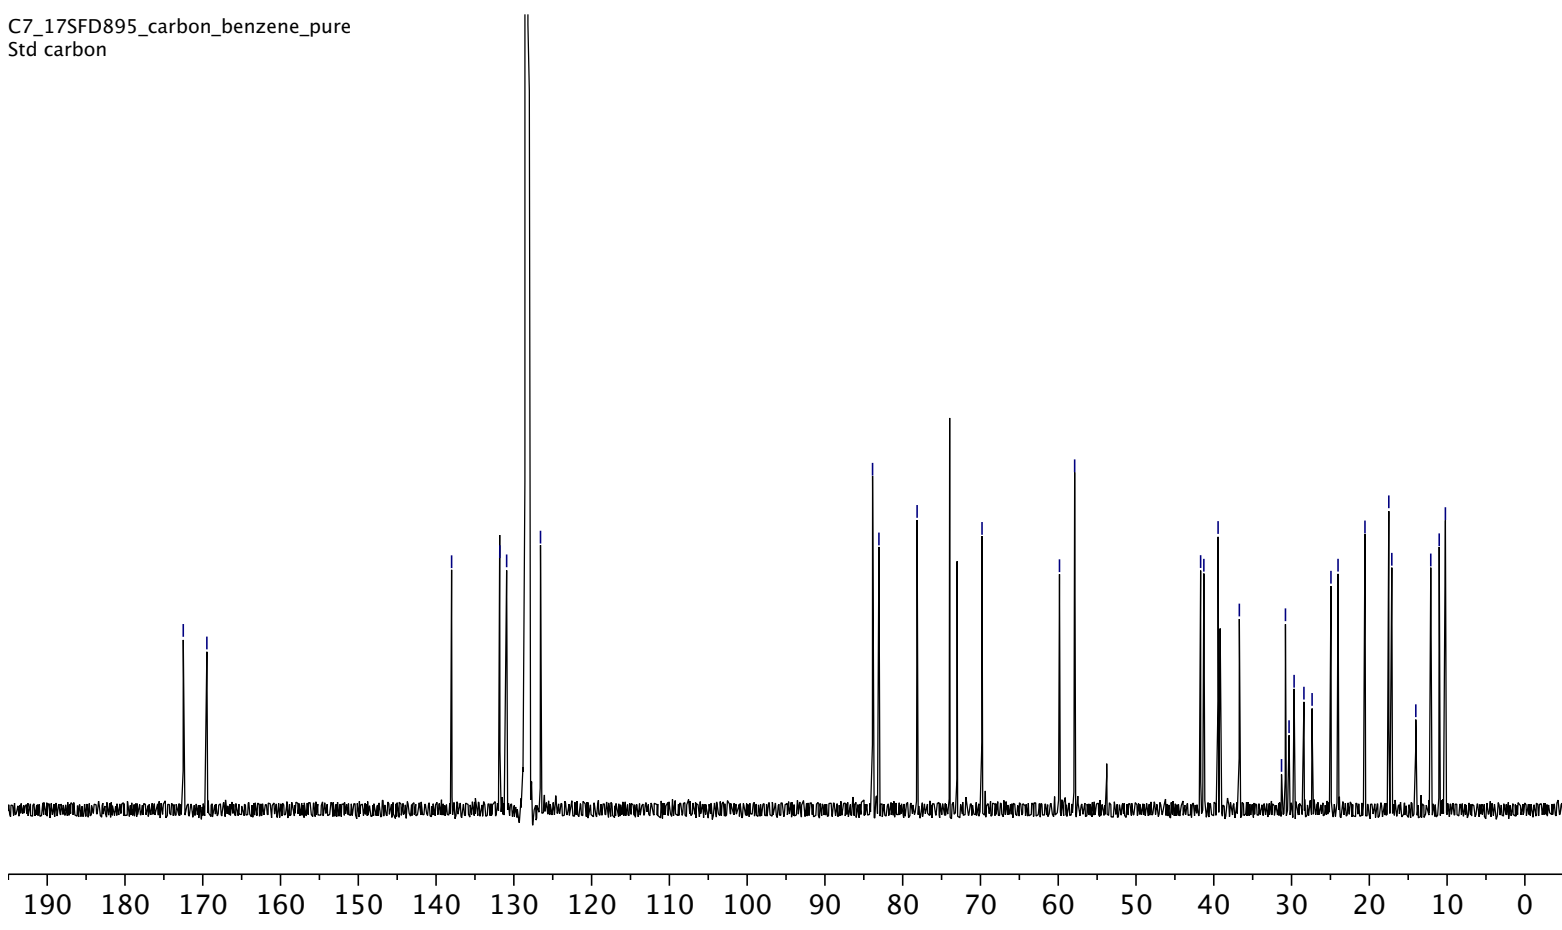

$^1\text{H}$ ,  $^1\text{H}$ -COSY (600 MHz) spectrum of 7*S*,17*S*-FD-895 (**1h**) in  $\text{C}_6\text{D}_6$

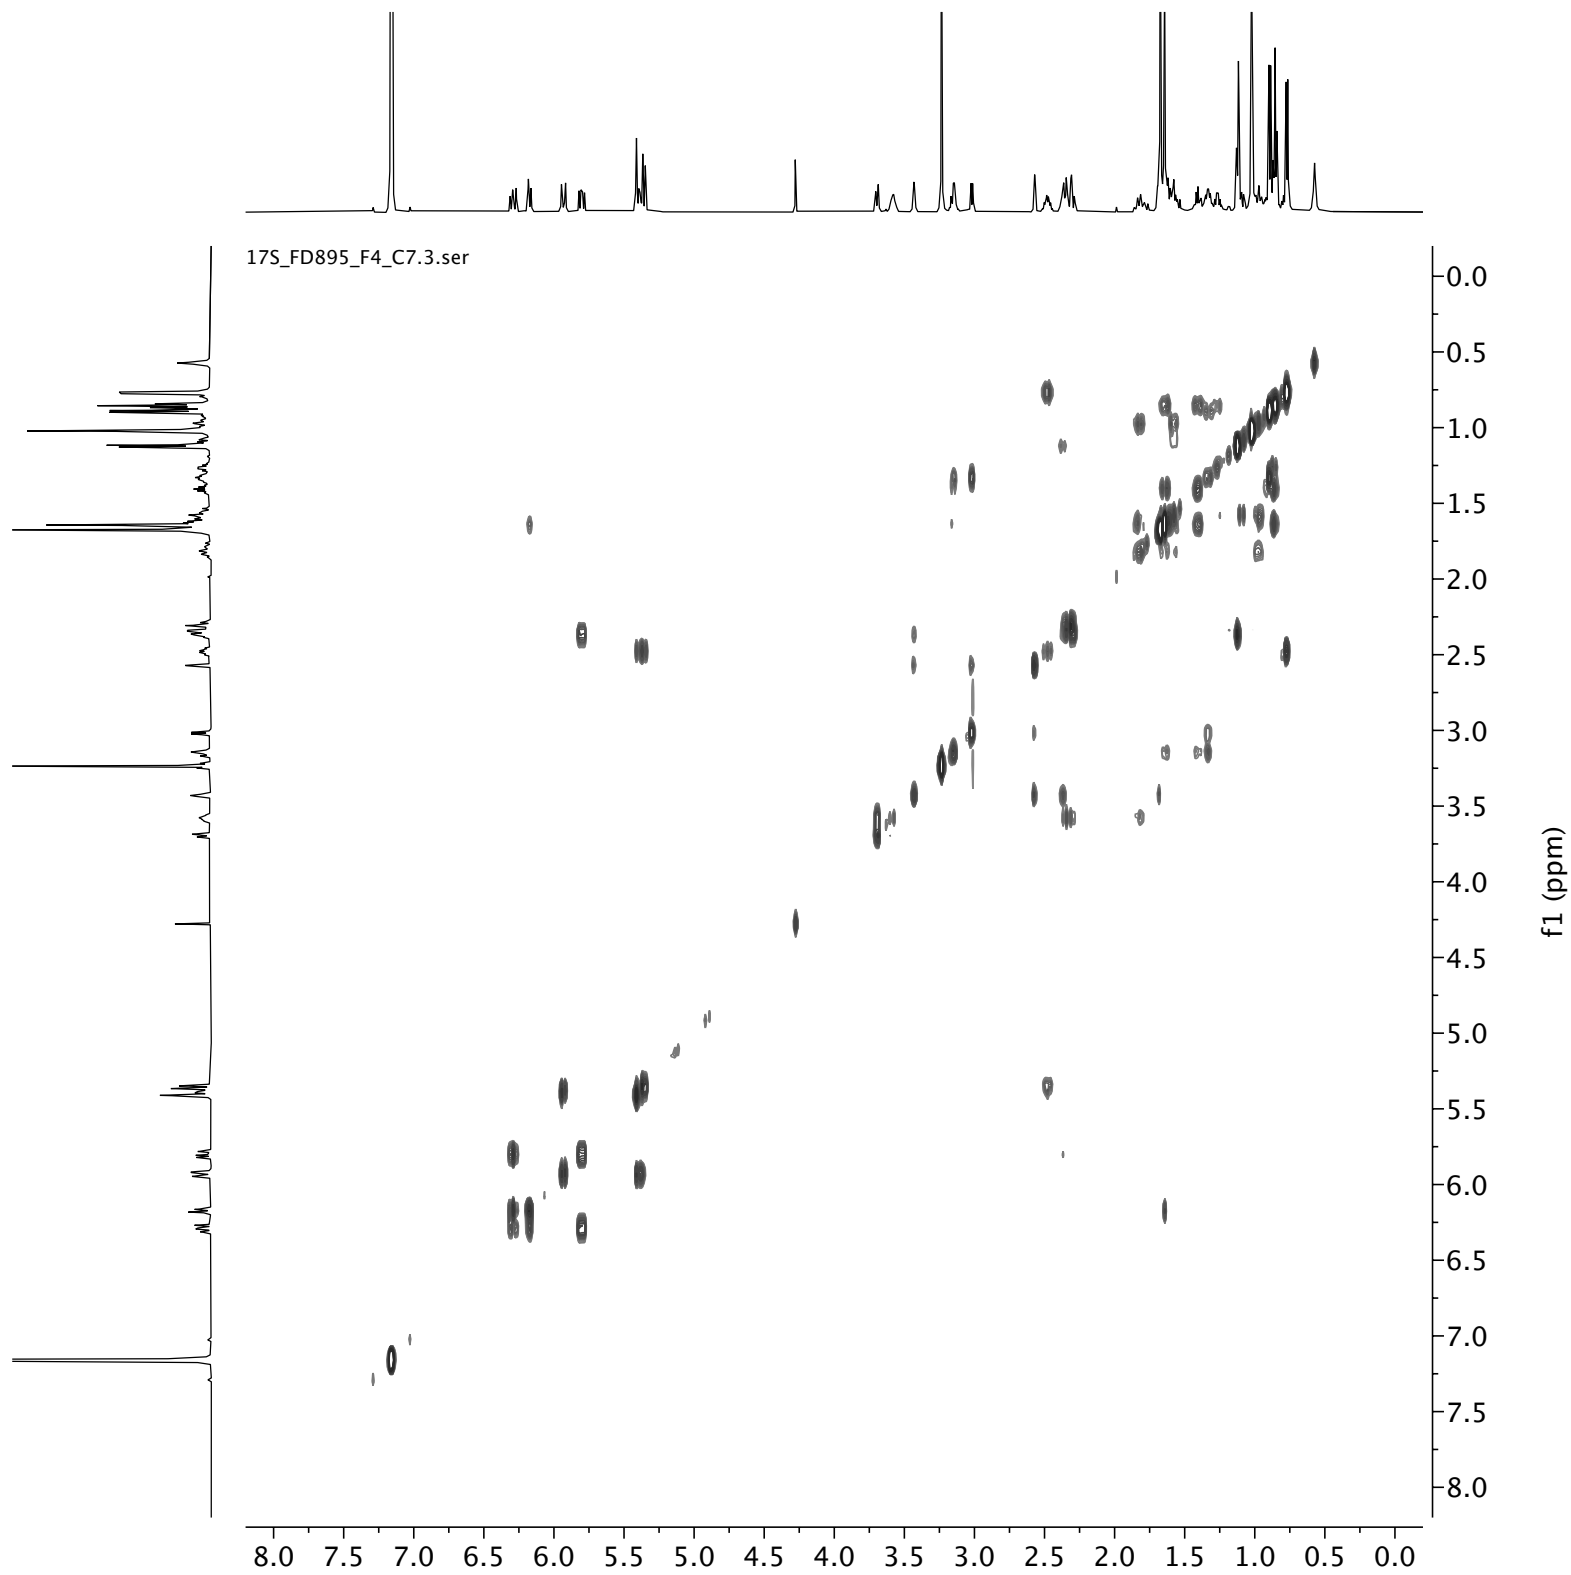

$^1\text{H}$ ,  $^1\text{H}$ -NOESY (600 MHz) spectrum of 7S,17S-FD-895 (**1h**) in  $\text{C}_6\text{D}_6$

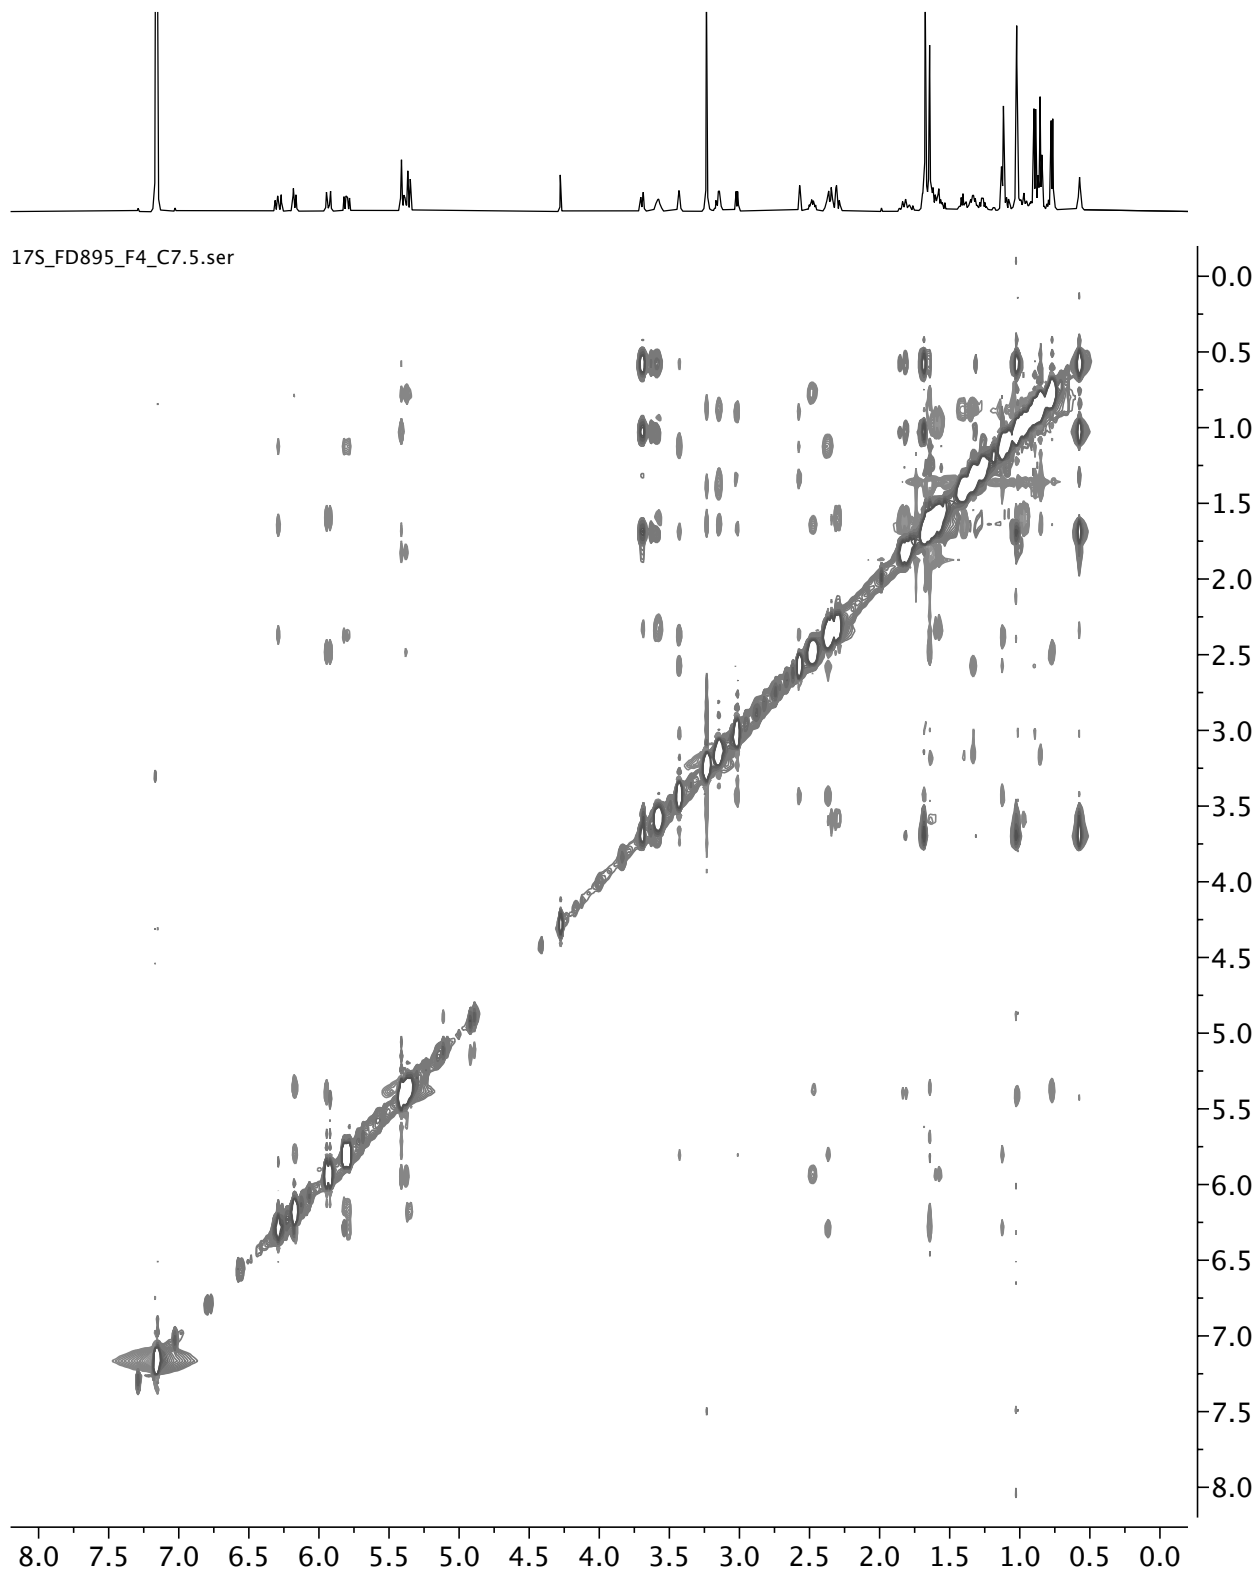

$^1\text{H}, ^{13}\text{C}$ -HSQC (600 MHz) spectrum of 7*S*,17*S*-FD-895 (**1h**) in  $\text{C}_6\text{D}_6$

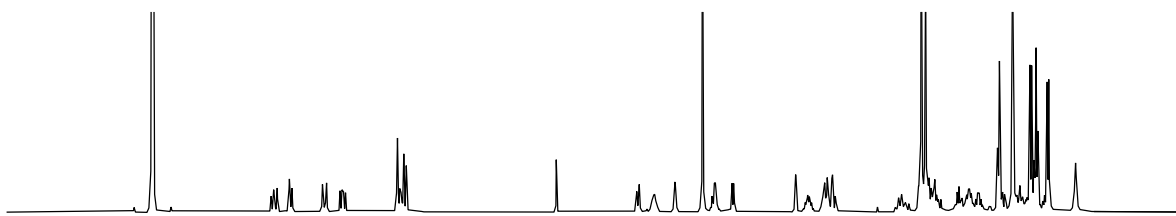

17S\_FD895\_F4\_C7.7.ser

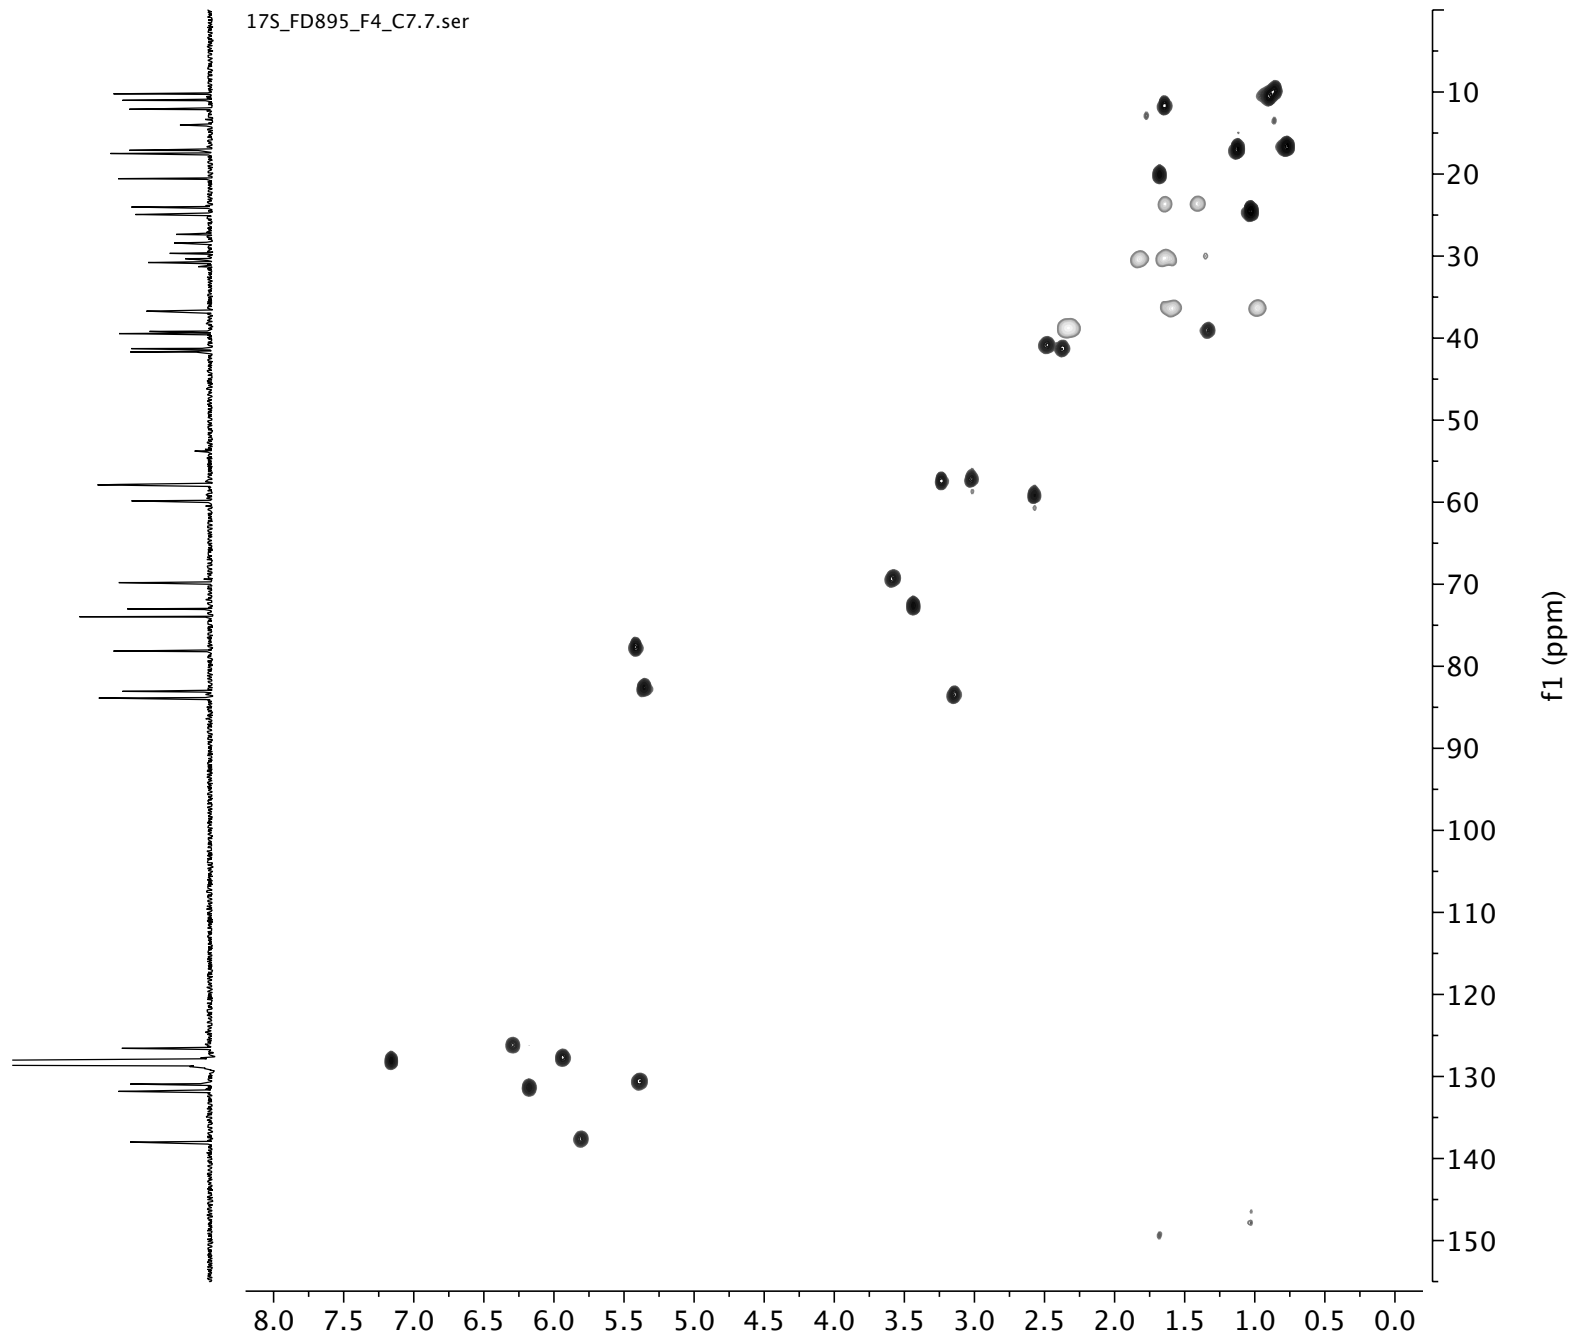

$^1\text{H}$ ,  $^{13}\text{C}$ -HMBC (600 MHz) spectrum of 7*S*,17*S*-FD-895 (**1h**) in  $\text{C}_6\text{D}_6$

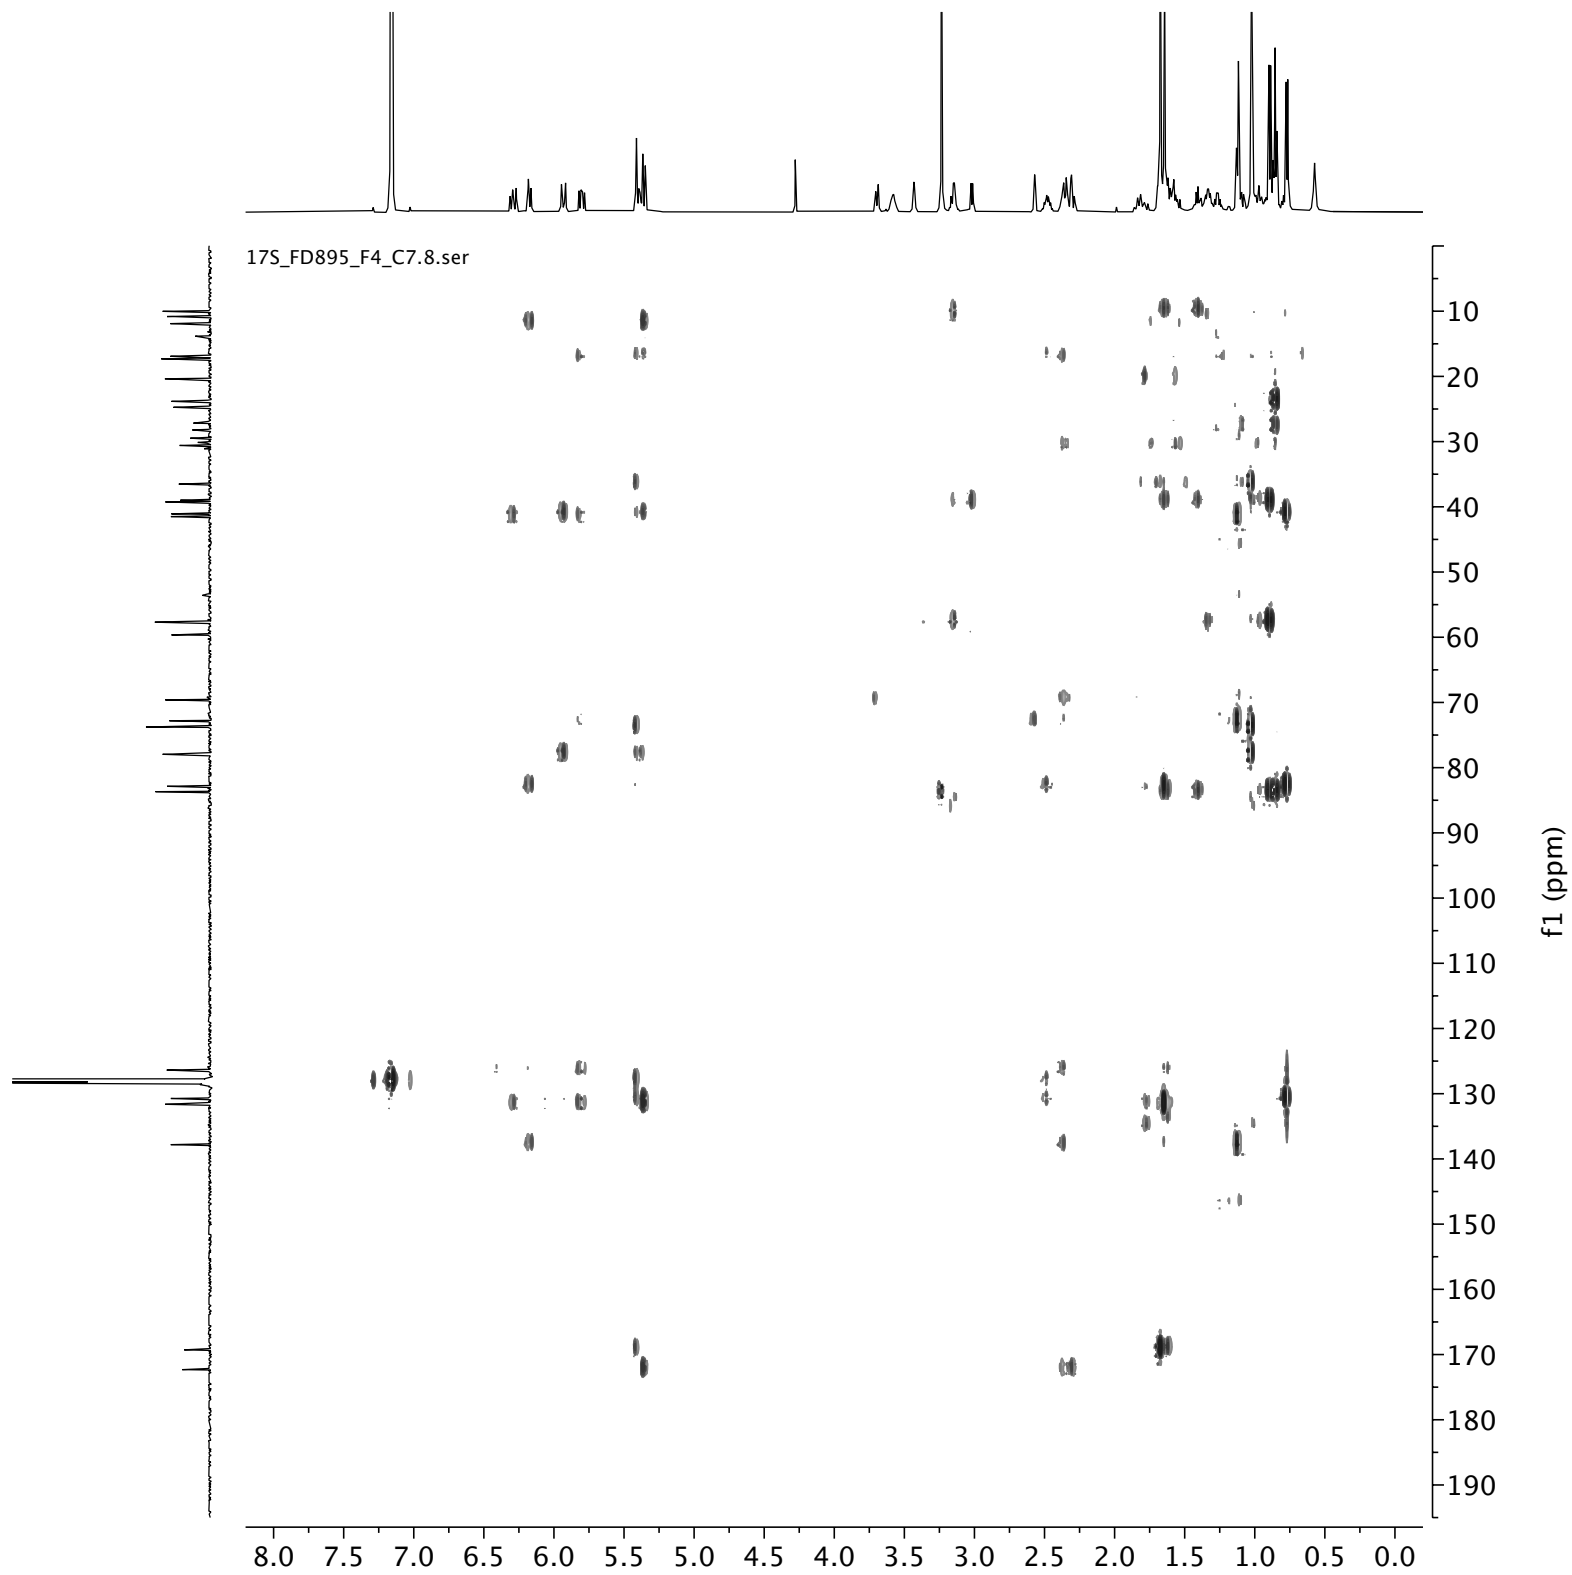

$^1\text{H}$ -NMR (600 MHz) and  $^{13}\text{C}$ -NMR (125 MHz) spectra of 17*S*,18*S*,19*S*-FD-895 (**1i**) in  $\text{C}_6\text{D}_6$

17S\_FD895\_I2\_C18C19EPOXIDE.2.fid

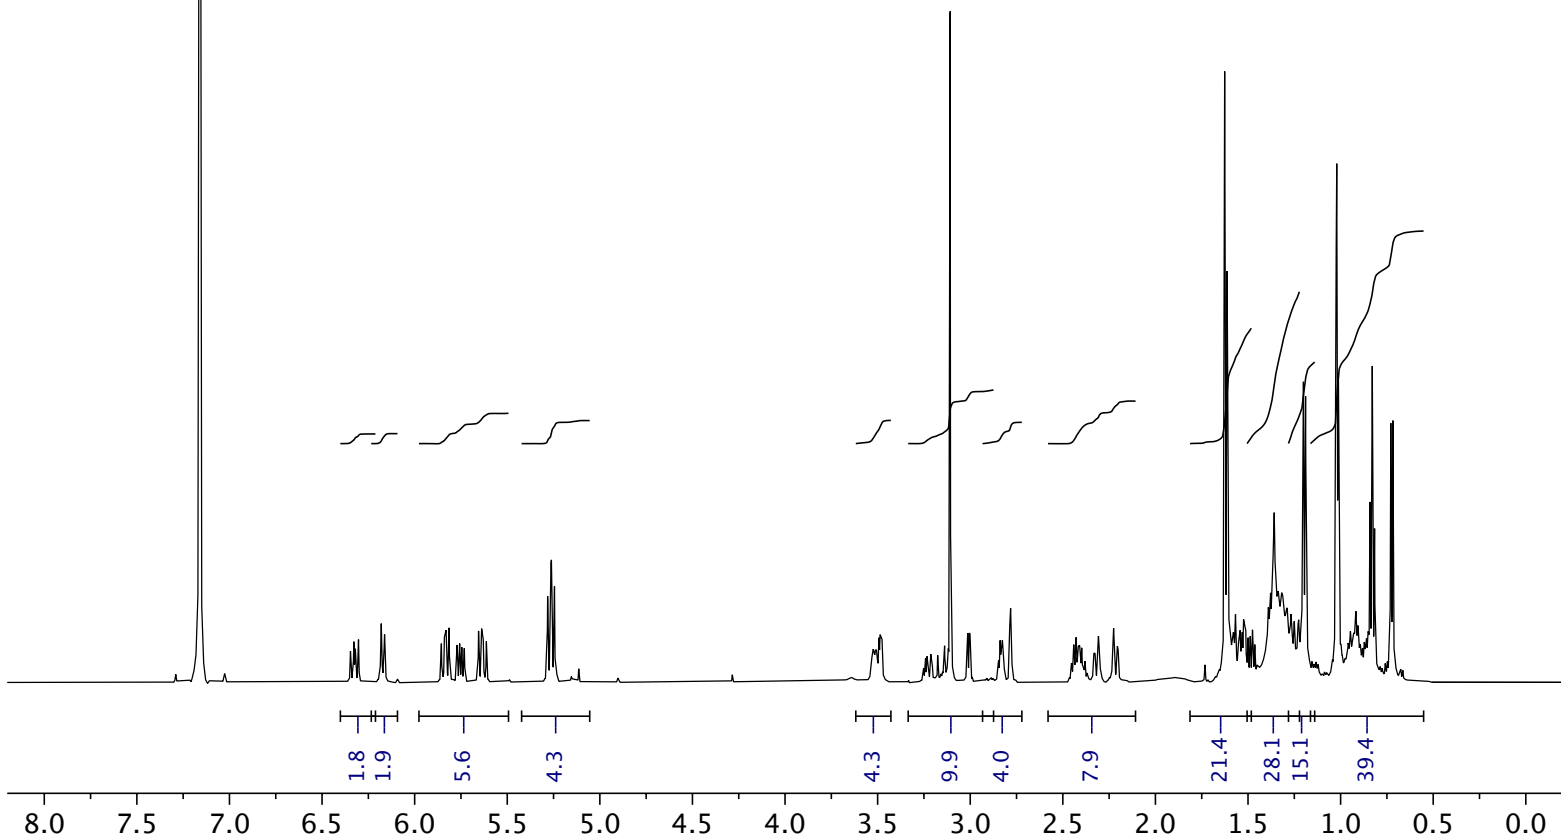

epi1819\_17SFD895\_HZ05f3\_carbon\_benzene  
Std carbon

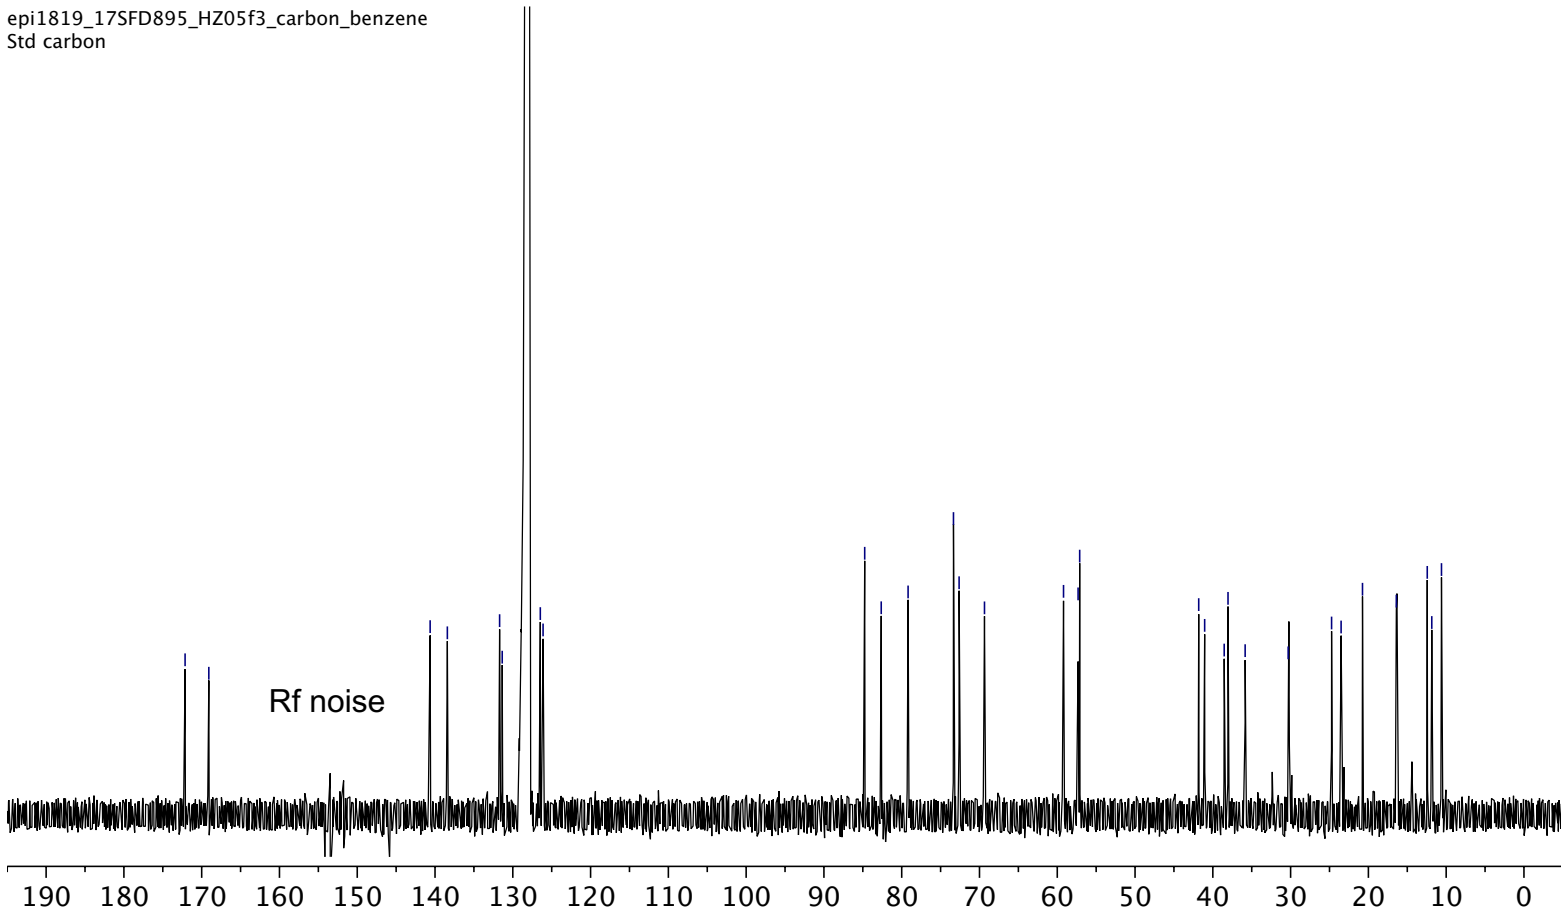

$^1\text{H}$ ,  $^1\text{H}$ -COSY (500 MHz) spectrum of 17S,18S,19S-FD-895 (1i) in  $\text{C}_6\text{D}_6$

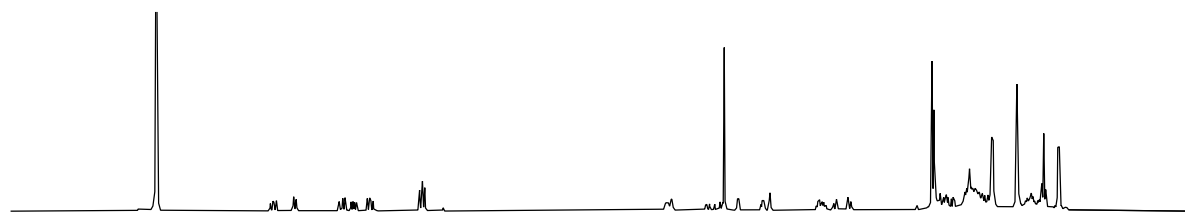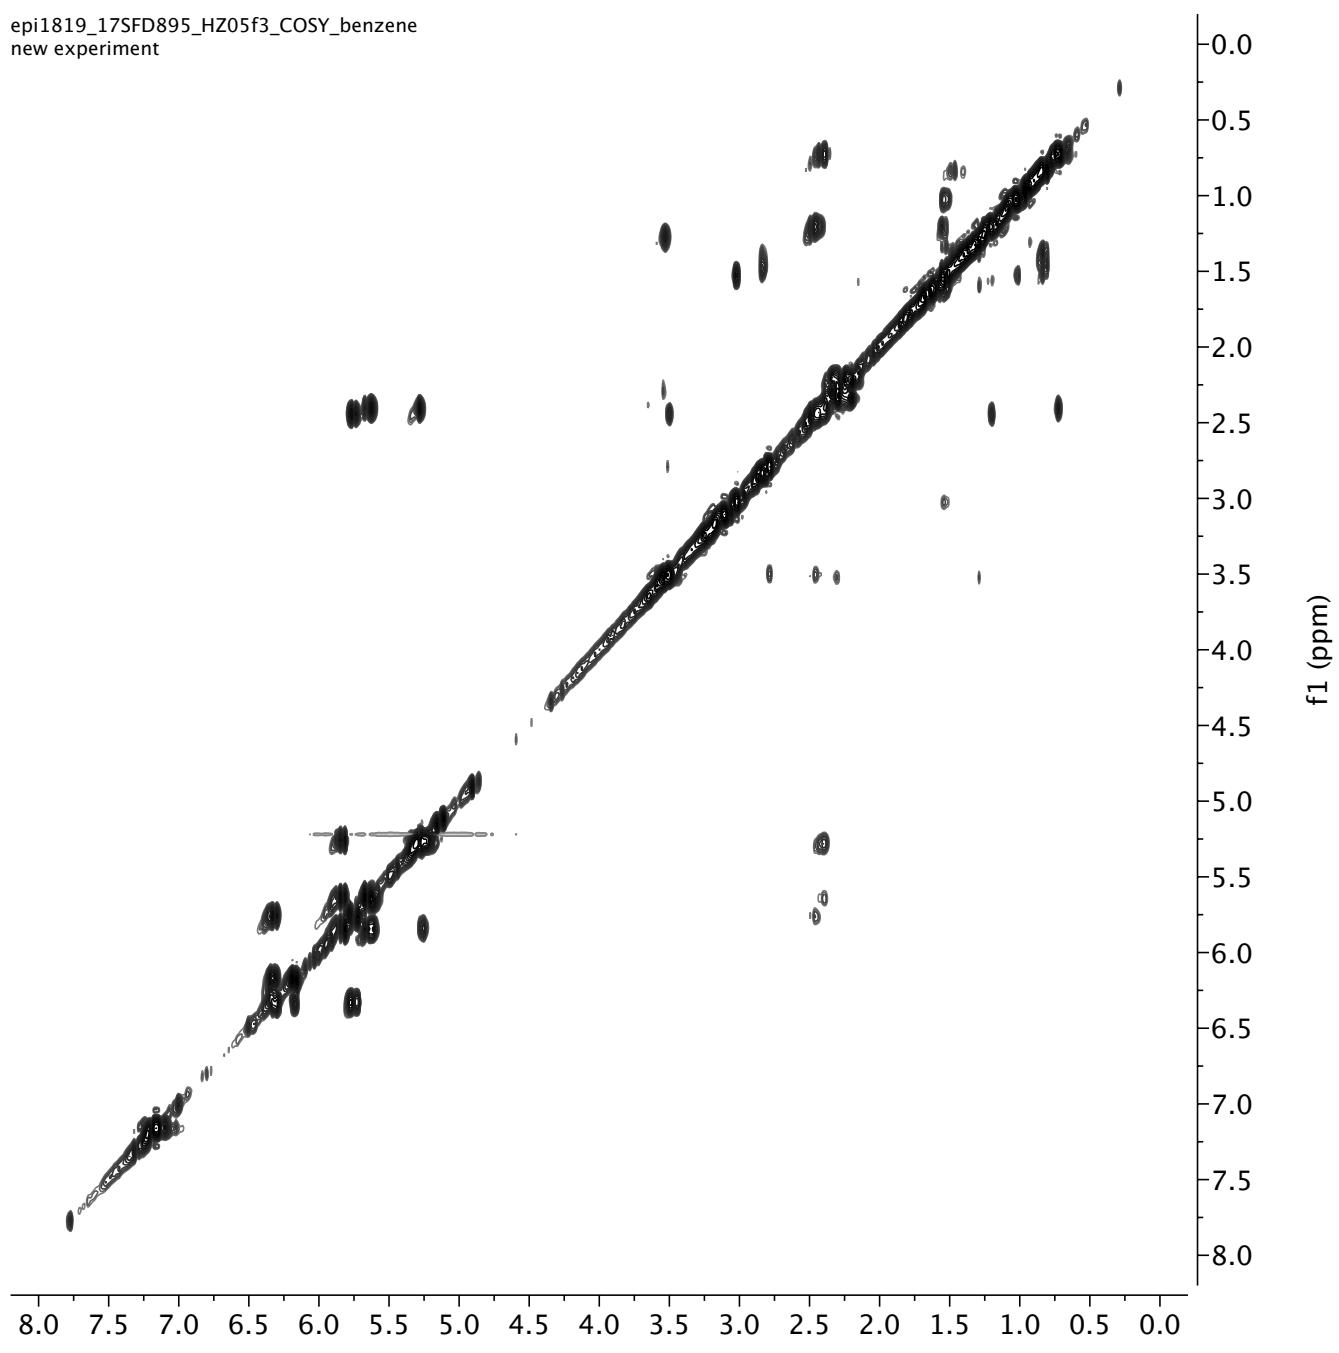



$^1\text{H}$ ,  $^1\text{H}$ -NOESY (600 MHz) spectrum of 17S,18S,19S-FD-895 (**1i**) in  $\text{C}_6\text{D}_6$

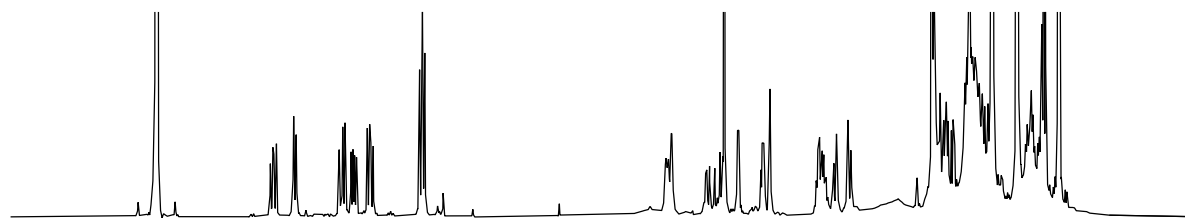

17S\_FD895\_I2\_C18C19EPOXIDE.6.ser

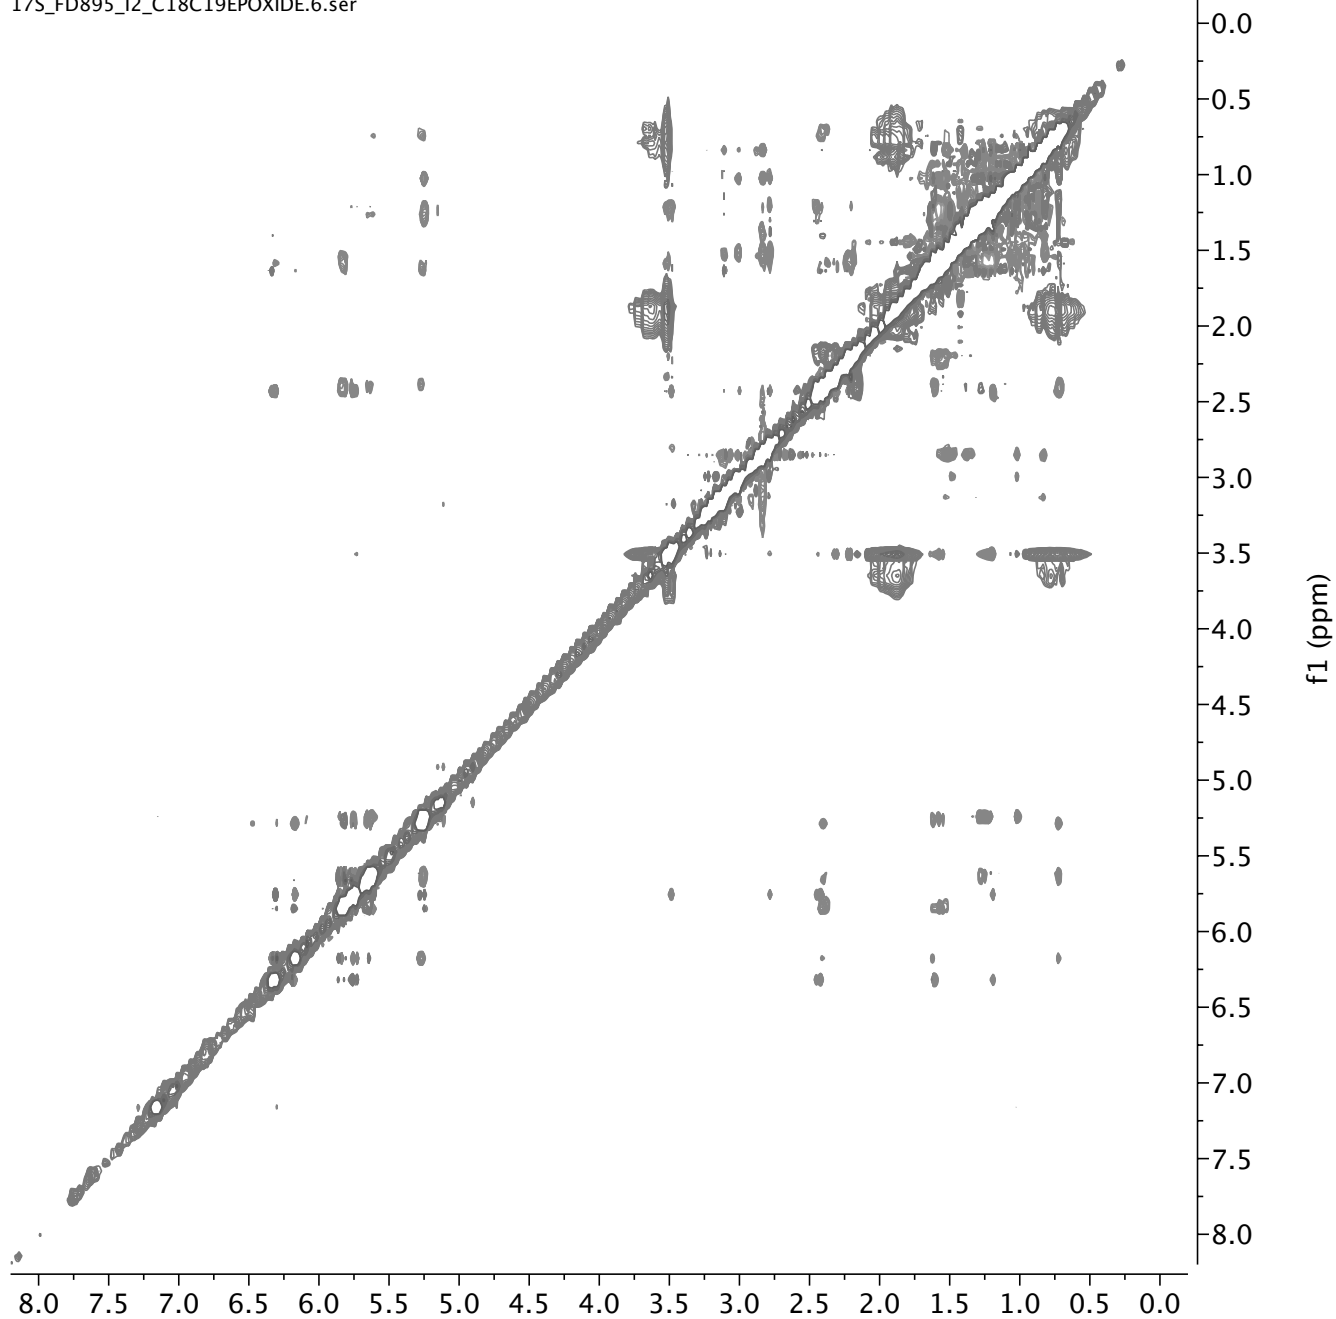

$^1\text{H}$ ,  $^{13}\text{C}$ -HSQC (600 MHz) spectrum of 17*S*,18*S*,19*S*-FD-895 (**1i**) in  $\text{C}_6\text{D}_6$

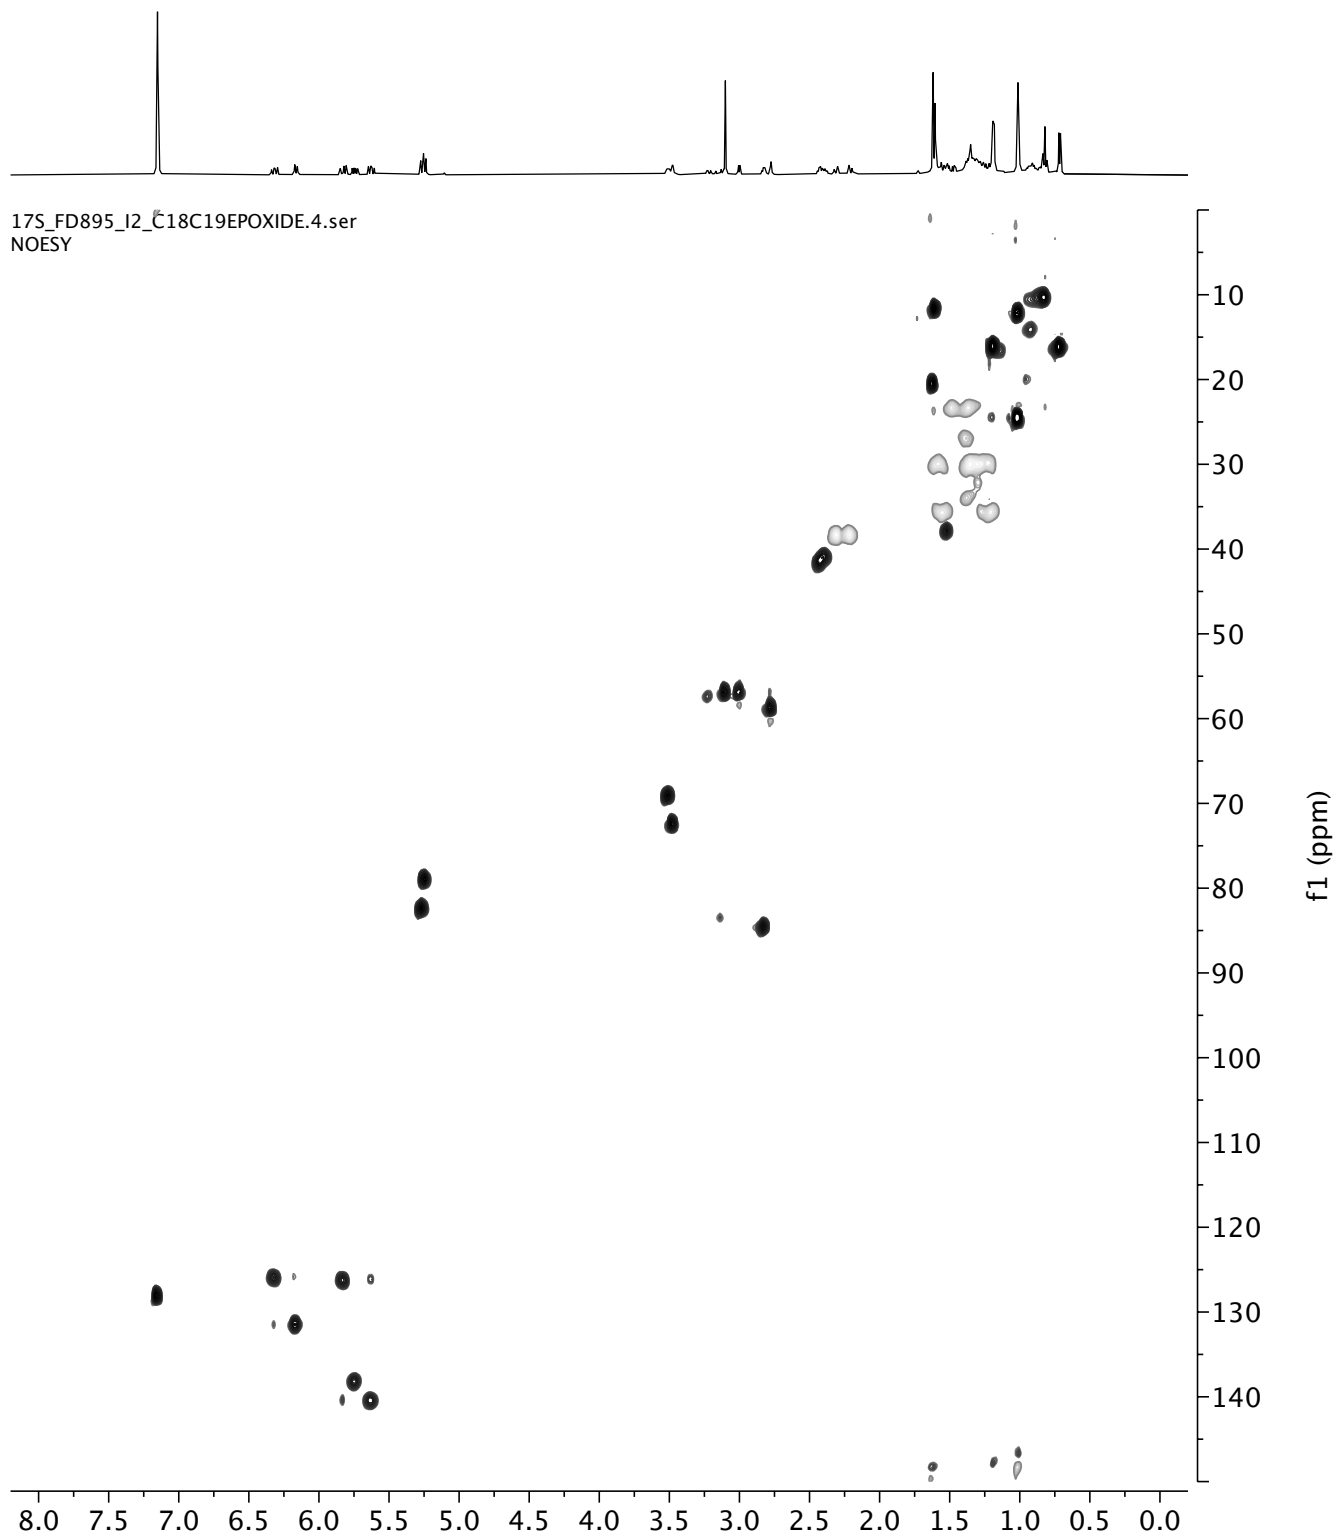

$^1\text{H}, ^{13}\text{C}$ -HMBC (600 MHz) spectrum of 3*S*,17*S*-FD-895 (**1i**) in  $\text{C}_6\text{D}_6$

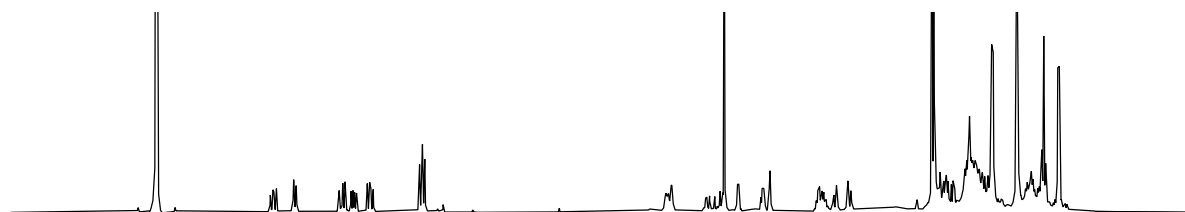

17S\_FD895\_I2\_C18C19EPOXIDE.5.ser  
HMBC

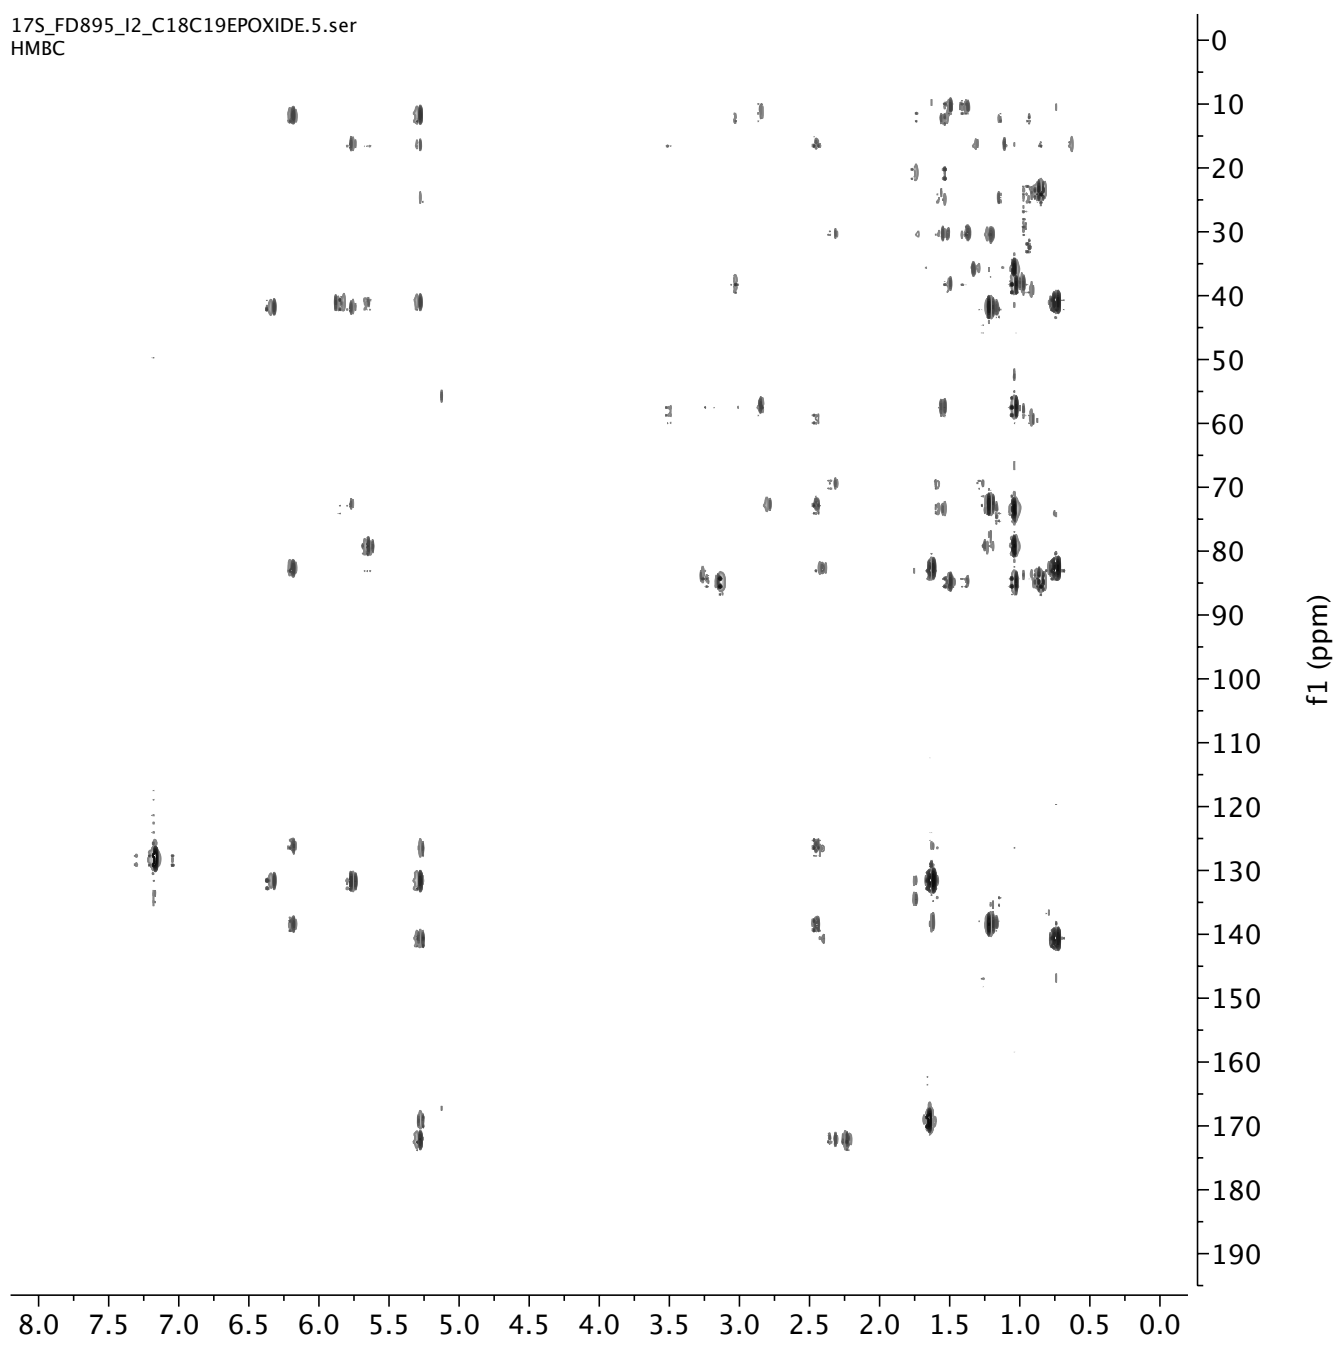



$^1\text{H}$ ,  $^1\text{H}$ -COSY (600 MHz) spectrum of 17S,20S,21S-FD-895 (**1j**) in  $\text{C}_6\text{D}_6$

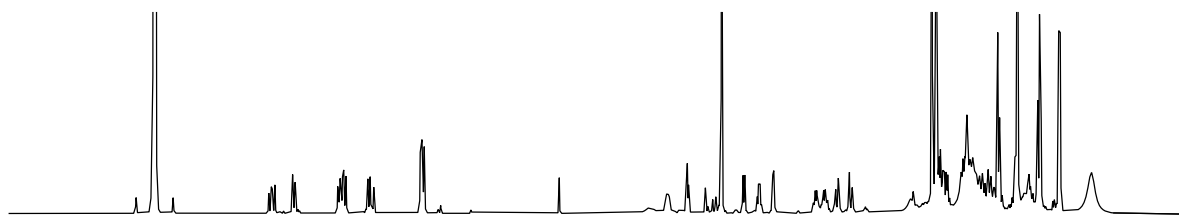

17S\_FD895\_H4\_C20C21.9.ser

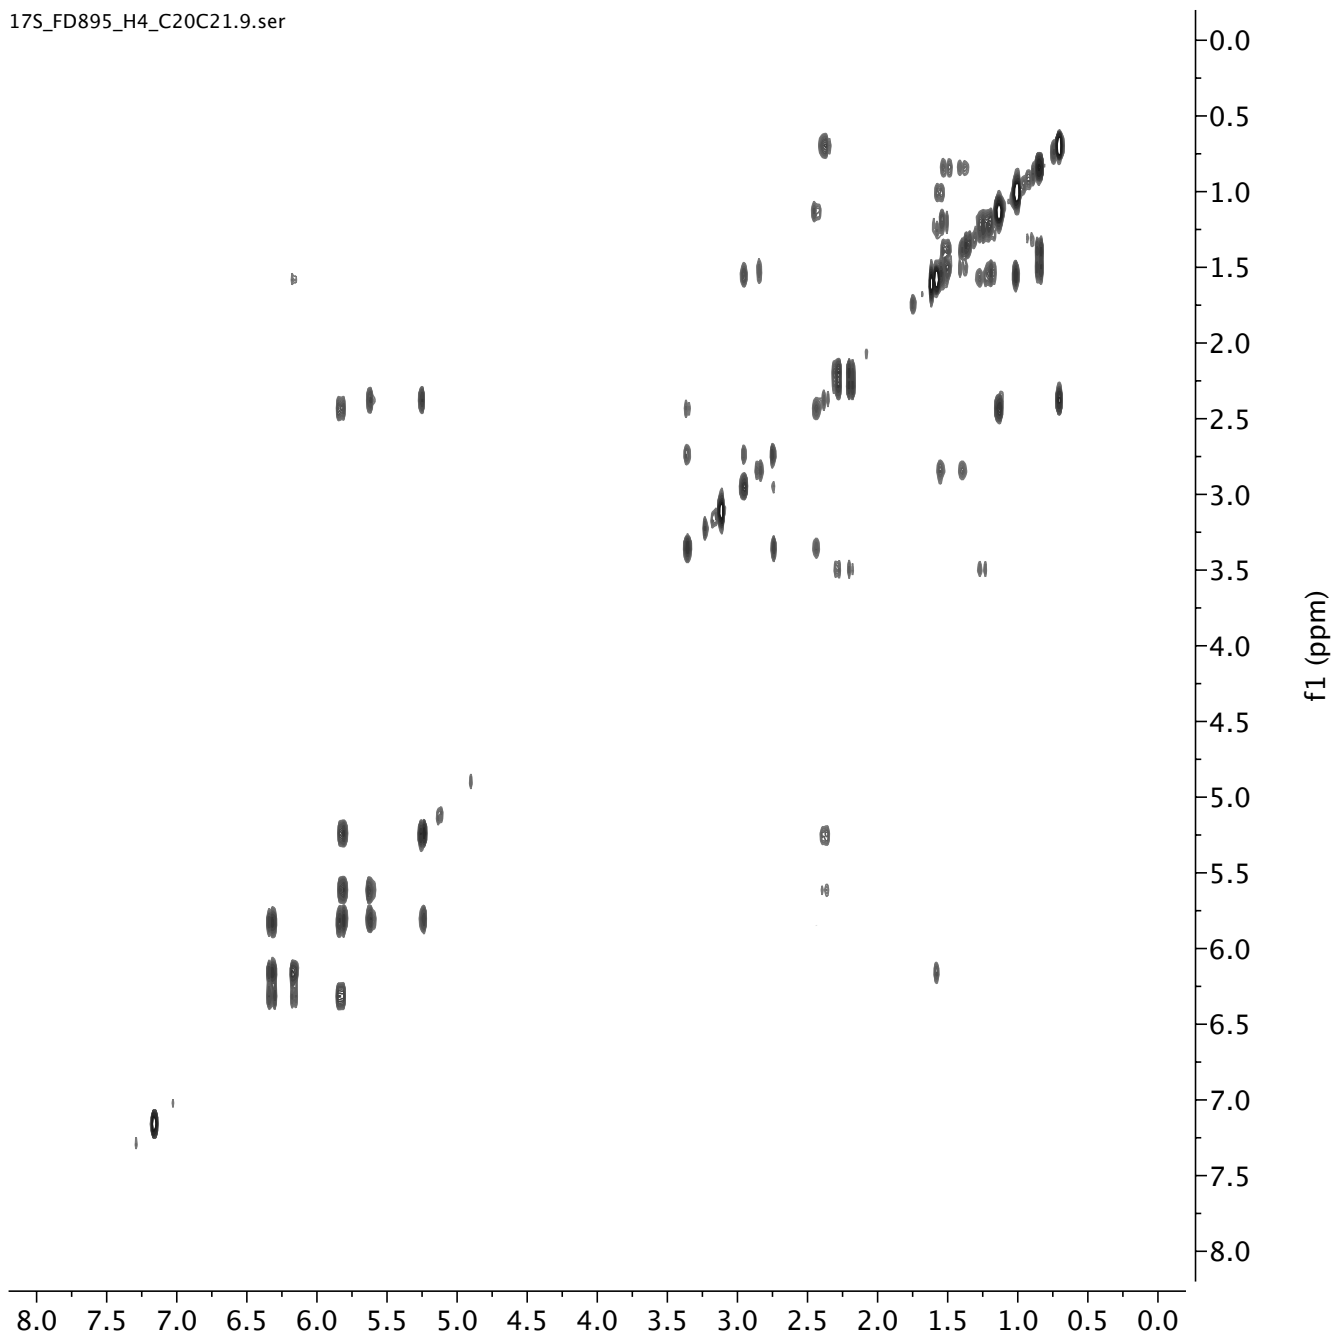

$^1\text{H}$ ,  $^1\text{H}$ -NOESY (600 MHz) spectrum of 17S,20S,21S-FD-895 (**1j**) in  $\text{C}_6\text{D}_6$

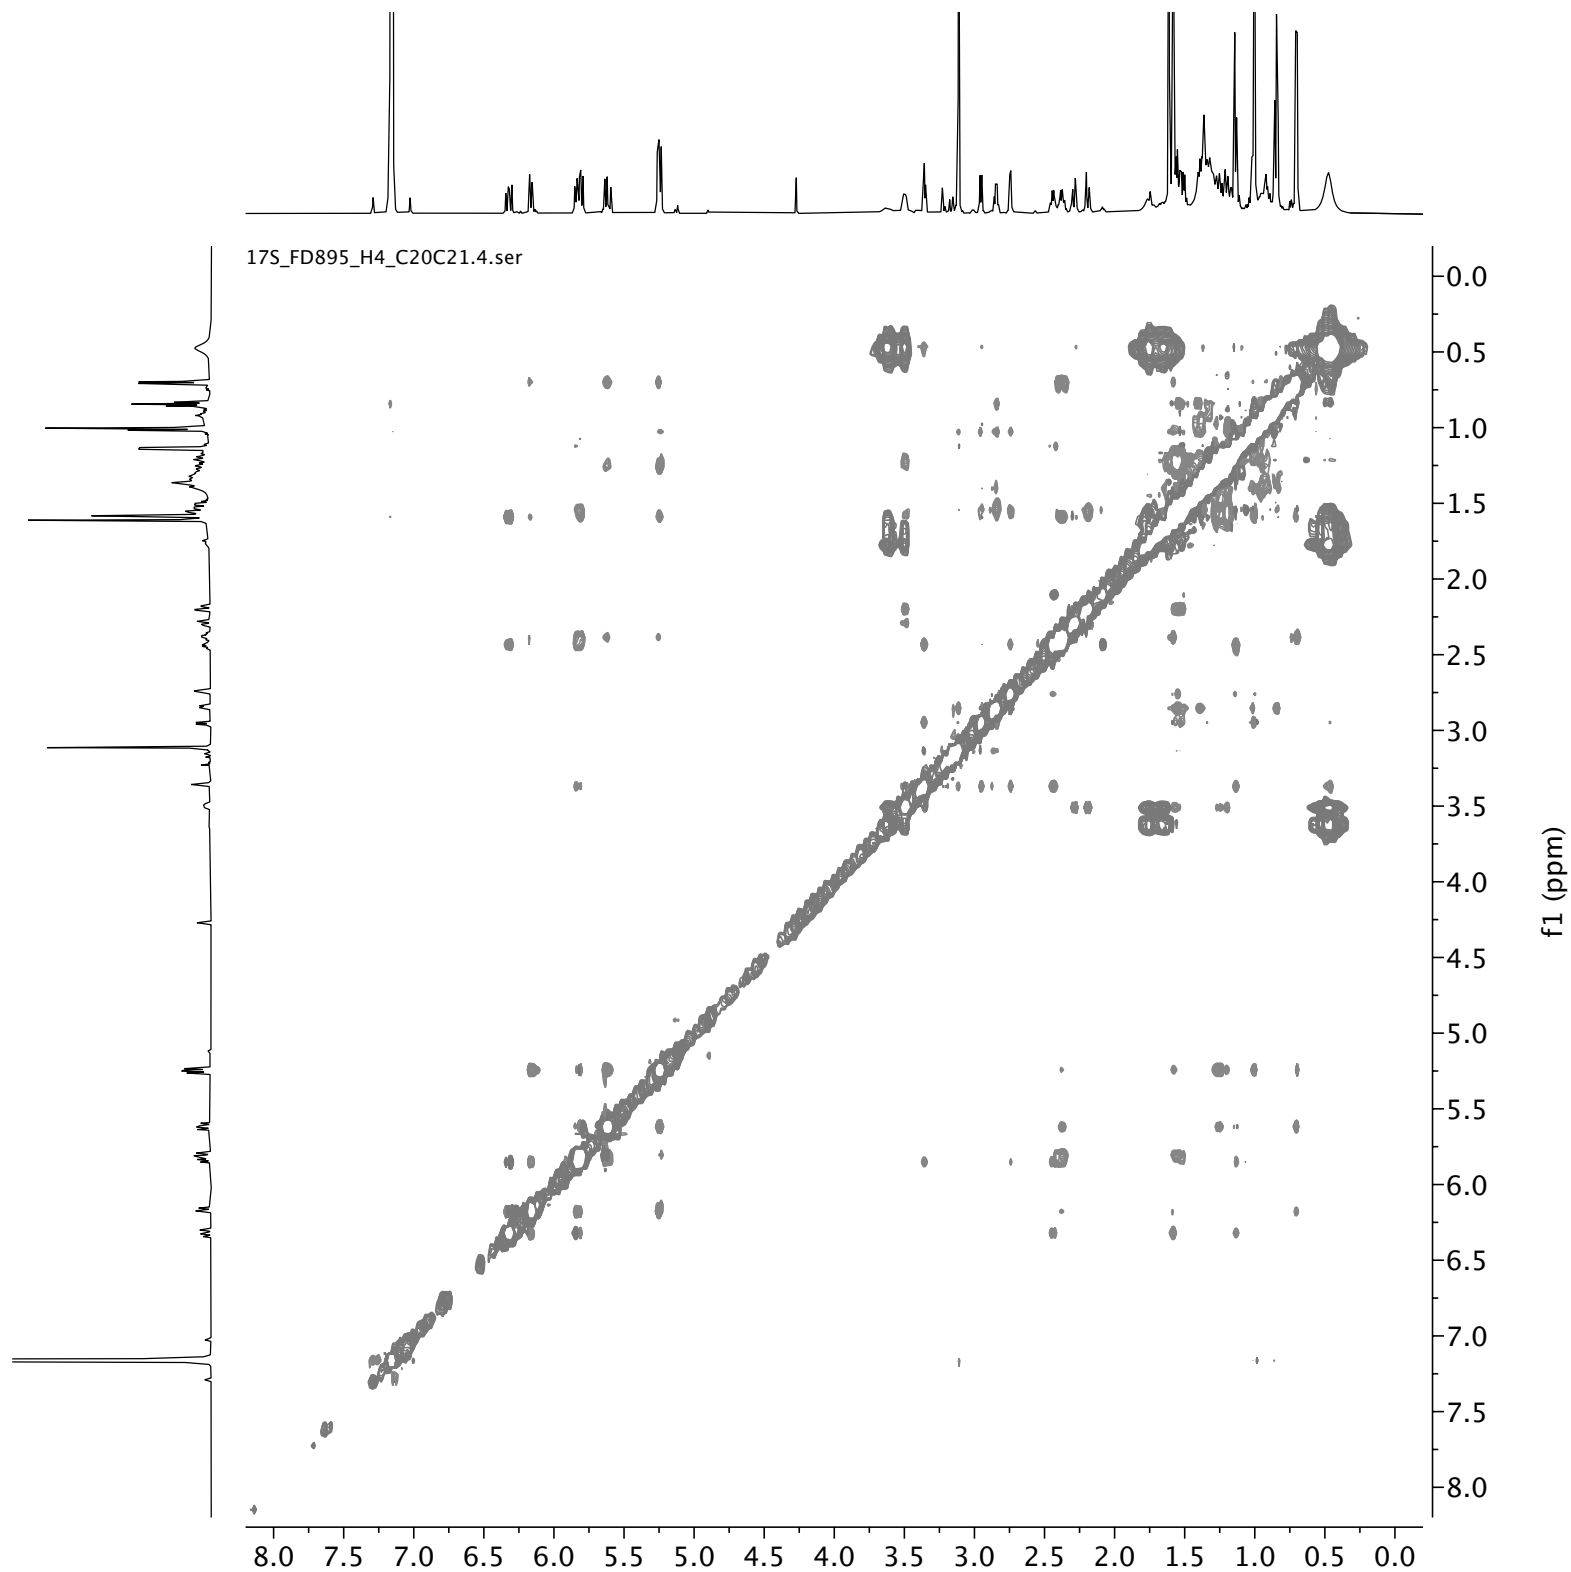

$^1\text{H}, ^{13}\text{C}$ -HSQC (600 MHz) spectrum of 17S,20S,21S-FD-895 (**1j**) in  $\text{C}_6\text{D}_6$

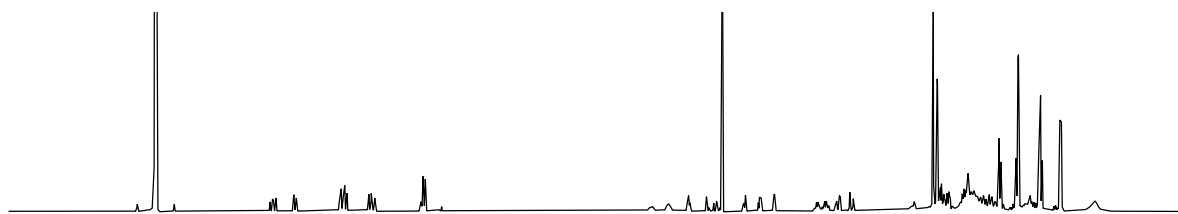

17S\_FD895\_H4\_C20C21.5.ser  
NOESY

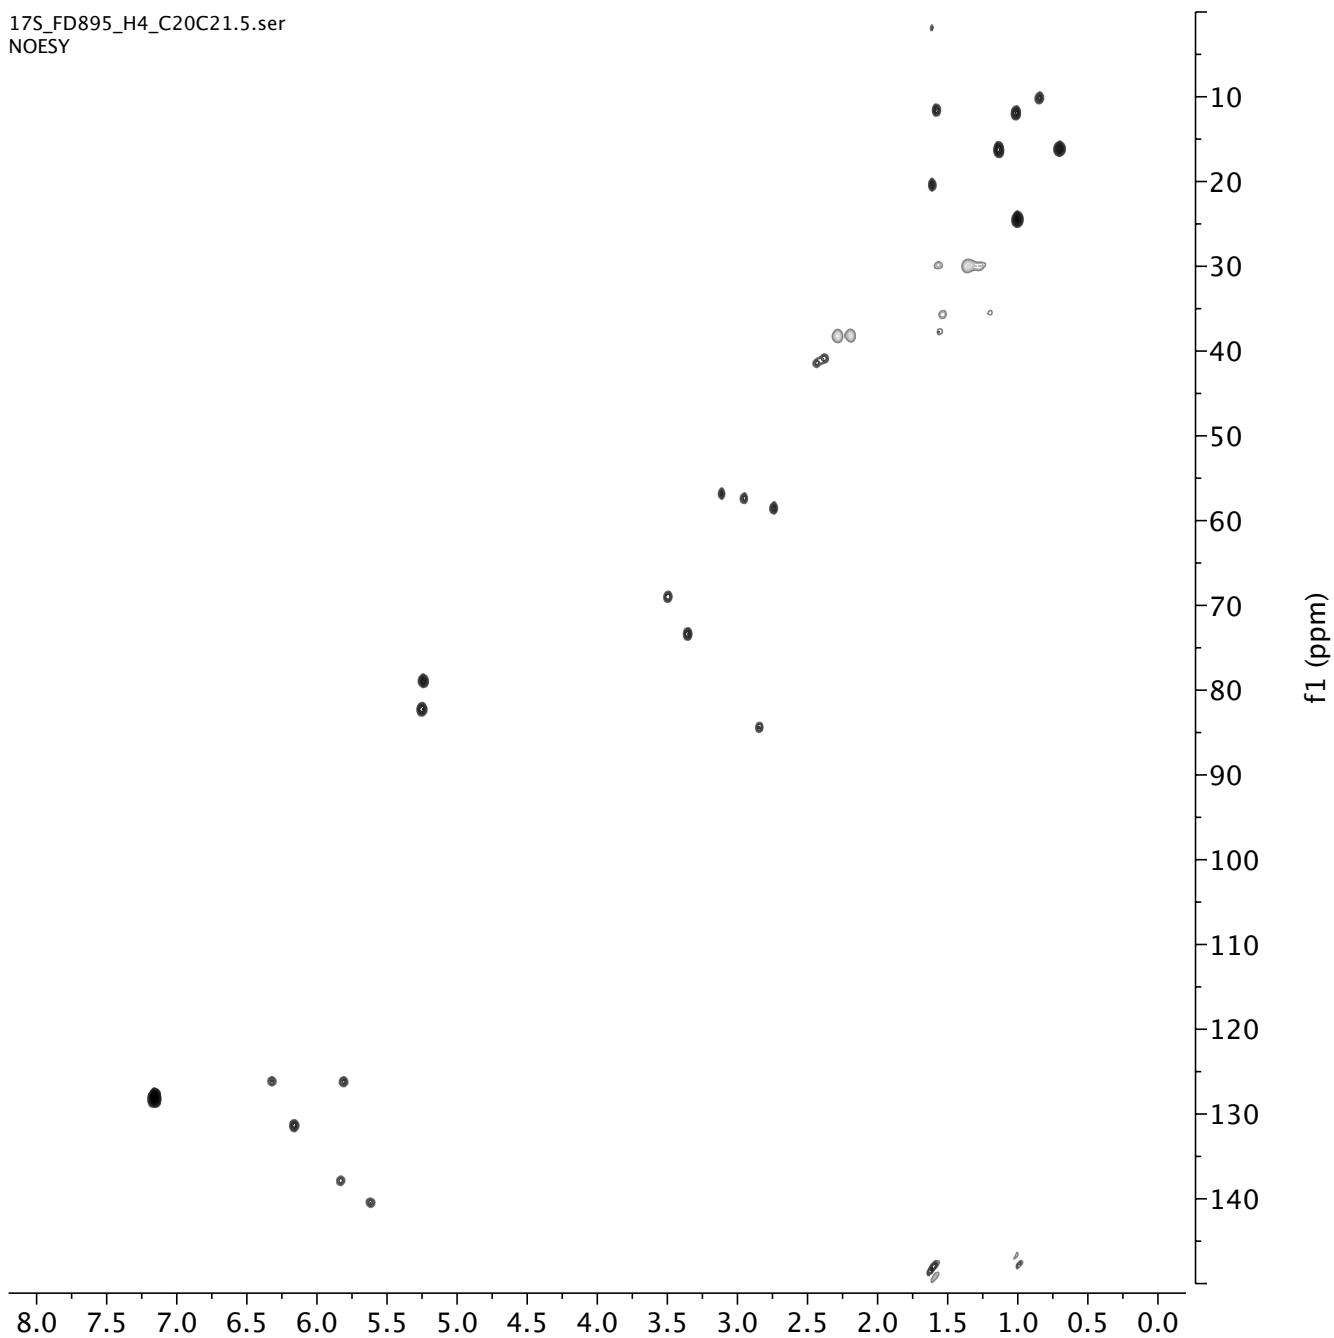

$^1\text{H}, ^{13}\text{C}$ -HMBC (600 MHz) spectrum of 17S,20S,21S-FD-895 (**1j**) in  $\text{C}_6\text{D}_6$

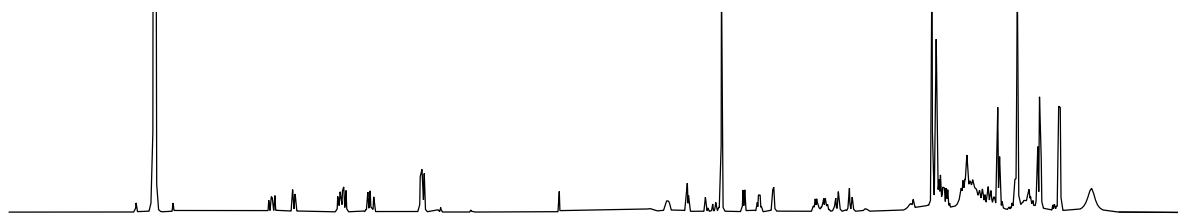

17S\_FD895\_H4\_C20C21.10.ser

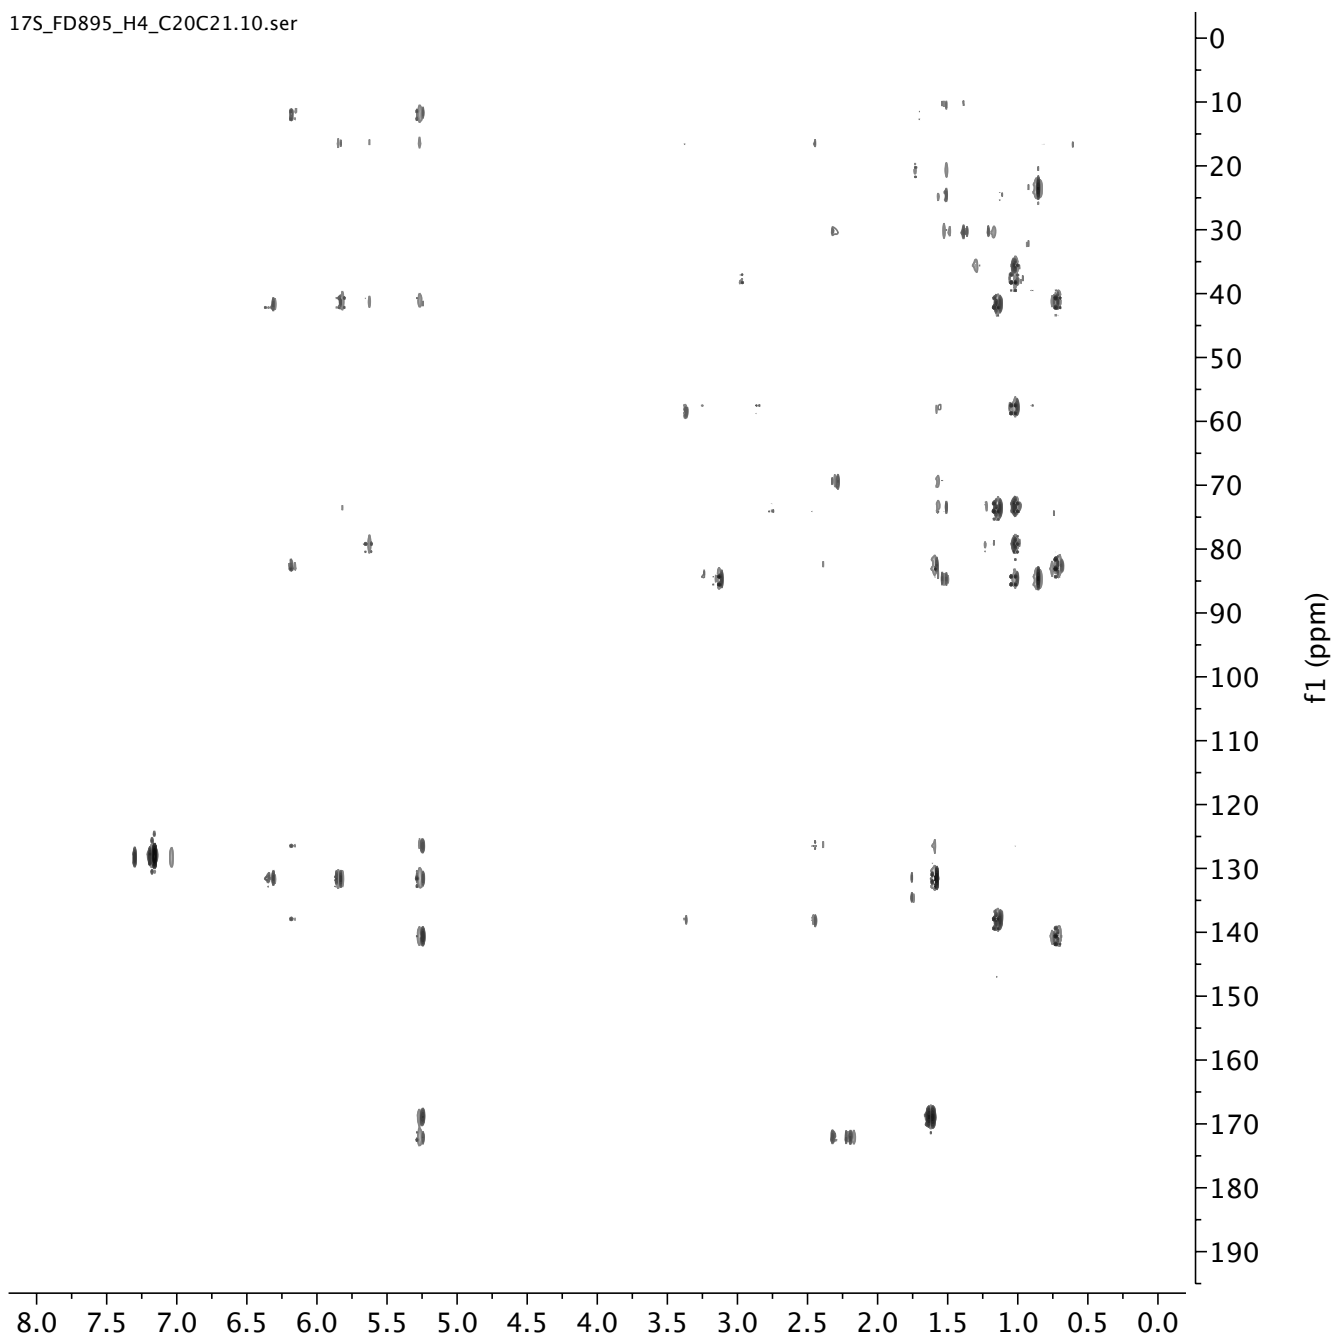



Sample Name: J5

```

=====
Acq. Operator   : Y. Su                               Seq. Line :   11
Acq. Instrument : Instrument 1                       Location  : Vial 11
Injection Date  : 1/4/2023 4:47:48 PM                Inj       :    1
                                                    Inj Volume: 20.0 µl
Different Inj Volume from Sequence !   Actual Inj Volume : 40.0 µl
Acq. Method     : D:\DATA\2023\BURKART\BURKART-HPLC-01042023-A 2023-01-04 13-04-53\HPLC-UV-MS-
                2021-A.M
Last changed    : 1/4/2023 12:59:41 PM by Y. Su
Analysis Method : C:\CHEM32\1\METHODS\HPLC-DATA-ANALYSIS-2022-A.M
Last changed    : 1/5/2023 10:05:03 AM by Y. Su
                (modified after loading)
    
```

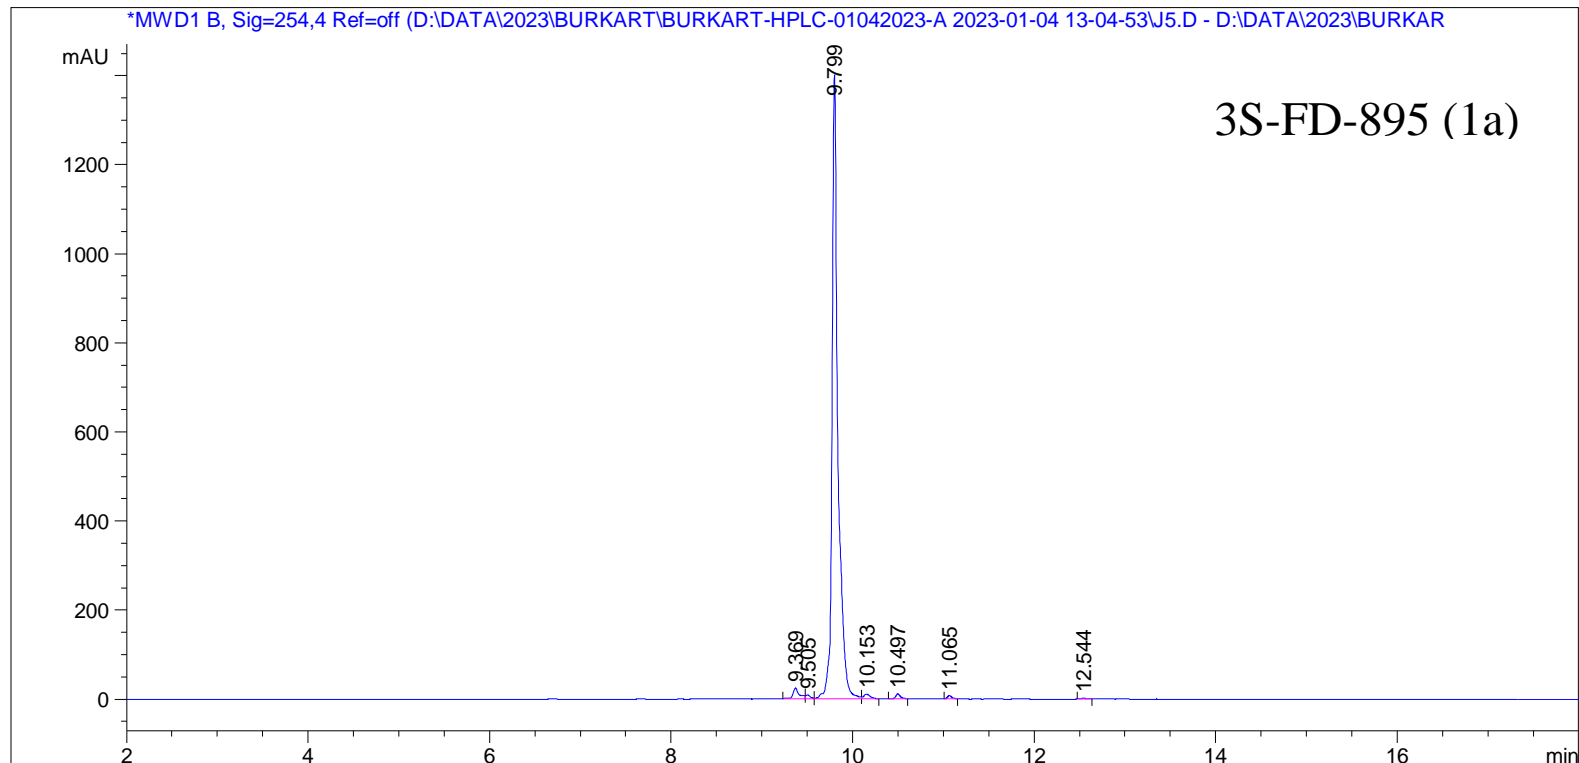

Area Percent Report

```

Sorted By           :      Signal
Multiplier:         :      1.0000
Dilution:           :      1.0000
Use Multiplier & Dilution Factor with ISTDs
    
```

Signal 1: MWD1 B, Sig=254,4 Ref=off  
 Signal has been modified after loading from rawdata file!

| Peak # | RetTime [min] | Type | Width [min] | Area [mAU*s] | Height [mAU] | Area % |
|--------|---------------|------|-------------|--------------|--------------|--------|
| 1      | 9.369         | BV   | 0.0704      | 121.24068    | 24.21441     | 1.8450 |
| 2      | 9.505         | VV   | 0.0530      | 33.13165     | 8.97960      | 0.5042 |

Sample Name: J5

| Peak # | RetTime [min] | Type | Width [min] | Area [mAU*s] | Height [mAU] | Area %  |
|--------|---------------|------|-------------|--------------|--------------|---------|
| 3      | 9.799         | VB   | 0.0643      | 6278.65576   | 1401.18237   | 95.5469 |
| 4      | 10.153        | BB   | 0.0741      | 57.52671     | 11.16870     | 0.8754  |
| 5      | 10.497        | BB   | 0.0594      | 47.07749     | 11.58256     | 0.7164  |
| 6      | 11.065        | BB   | 0.0541      | 27.89825     | 7.73891      | 0.4245  |
| 7      | 12.544        | BB   | 0.0545      | 5.74987      | 1.65786      | 0.0875  |

Totals : 6571.28040 1466.52441

=====  
\*\*\* End of Report \*\*\*

Sample Name: A5: 4.0 ug loaded

```

=====
Acq. Operator   : Y. Su                               Seq. Line :   13
Acq. Instrument : Instrument 1                         Location  : Vial 2
Injection Date  : 1/4/2023 5:32:29 PM                Inj       :    1
                                                    Inj Volume: 20.0 µl
Different Inj Volume from Sequence !   Actual Inj Volume : 40.0 µl
Acq. Method     : D:\DATA\2023\BURKART\BURKART-HPLC-01042023-A 2023-01-04 13-04-53\HPLC-UV-MS-
                2021-A.M
Last changed    : 1/4/2023 12:59:41 PM by Y. Su
Analysis Method : C:\CHEM32\1\METHODS\HPLC-DATA-ANALYSIS-2022-A.M
Last changed    : 1/4/2023 1:51:37 PM by Y. Su
                (modified after loading)
    
```

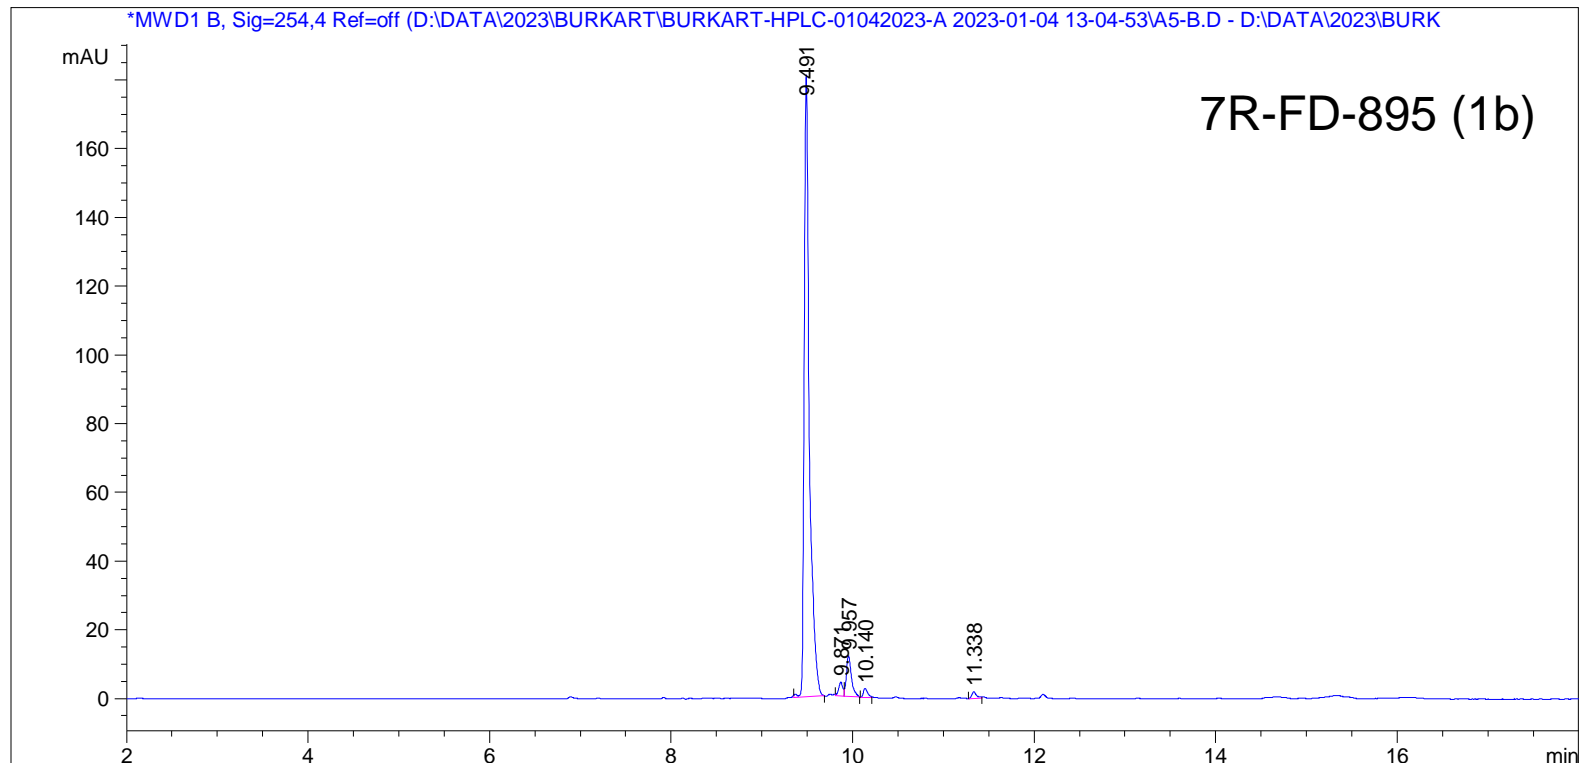

Area Percent Report

```

Sorted By      :      Signal
Multiplier:    :      1.0000
Dilution:      :      1.0000
Use Multiplier & Dilution Factor with ISTDs
    
```

Signal 1: MWD1 B, Sig=254,4 Ref=off  
 Signal has been modified after loading from rawdata file!

| Peak # | RetTime [min] | Type | Width [min] | Area [mAU*s] | Height [mAU] | Area %  |
|--------|---------------|------|-------------|--------------|--------------|---------|
| 1      | 9.491         | BB   | 0.0580      | 713.53564    | 181.14104    | 90.6033 |
| 2      | 9.871         | BV   | 0.0470      | 12.10154     | 3.91669      | 1.5366  |

Sample Name: A5: 4.0 ug loaded

| Peak # | RetTime [min] | Type | Width [min] | Area [mAU*s] | Height [mAU] | Area % |
|--------|---------------|------|-------------|--------------|--------------|--------|
| 3      | 9.957         | VB   | 0.0572      | 45.88954     | 11.85467     | 5.8270 |
| 4      | 10.140        | BB   | 0.0497      | 8.67712      | 2.61813      | 1.1018 |
| 5      | 11.338        | BB   | 0.0553      | 7.33431      | 1.97690      | 0.9313 |

Totals : 787.53816 201.50742

=====  
\*\*\* End of Report \*\*\*

Sample Name: B5: 4.0 ug loaded

```

=====
Acq. Operator   : Y. Su                               Seq. Line :   14
Acq. Instrument : Instrument 1                         Location  : Vial 3
Injection Date  : 1/4/2023 5:54:49 PM                 Inj       :    1
                                                    Inj Volume: 20.0 µl
Different Inj Volume from Sequence !   Actual Inj Volume : 40.0 µl
Acq. Method     : D:\DATA\2023\BURKART\BURKART-HPLC-01042023-A 2023-01-04 13-04-53\HPLC-UV-MS-
                2021-A.M
Last changed    : 1/4/2023 12:59:41 PM by Y. Su
Analysis Method : C:\CHEM32\1\METHODS\HPLC-DATA-ANALYSIS-2022-A.M
Last changed    : 1/4/2023 1:51:37 PM by Y. Su
                (modified after loading)
    
```

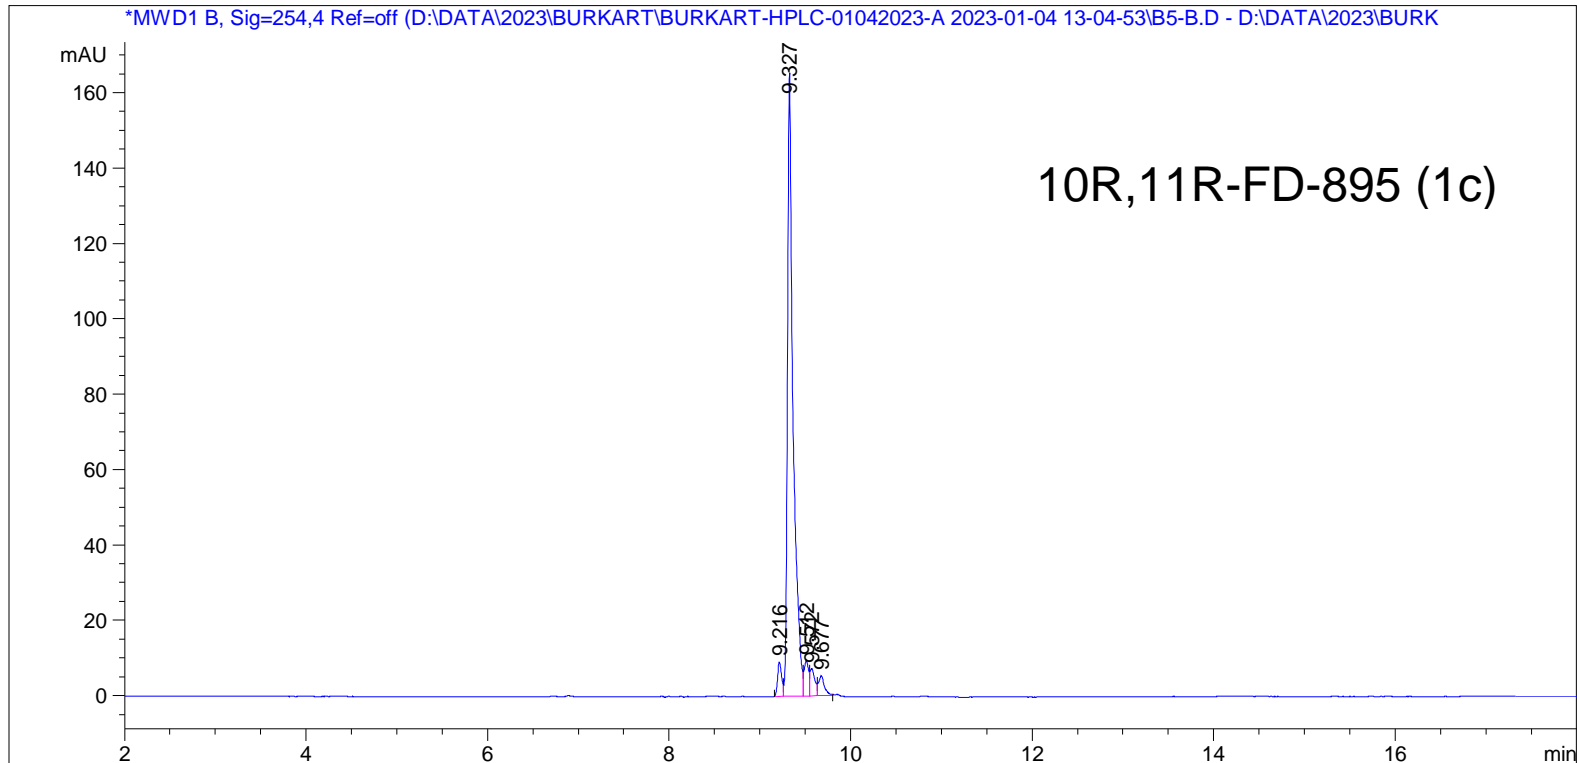

Area Percent Report

```

Sorted By      :      Signal
Multiplier:    :      1.0000
Dilution:      :      1.0000
Use Multiplier & Dilution Factor with ISTDs
    
```

Signal 1: MWD1 B, Sig=254,4 Ref=off  
 Signal has been modified after loading from rawdata file!

| Peak # | RetTime [min] | Type | Width [min] | Area [mAU*s] | Height [mAU] | Area %  |
|--------|---------------|------|-------------|--------------|--------------|---------|
| 1      | 9.216         | BV   | 0.0488      | 28.92623     | 9.16686      | 3.4638  |
| 2      | 9.327         | VV   | 0.0629      | 721.26758    | 165.39879    | 86.3688 |

Sample Name: B5: 4.0 ug loaded

| Peak # | RetTime [min] | Type | Width [min] | Area [mAU*s] | Height [mAU] | Area % |
|--------|---------------|------|-------------|--------------|--------------|--------|
| 3      | 9.512         | VV   | 0.0502      | 32.86232     | 9.53437      | 3.9351 |
| 4      | 9.572         | VV   | 0.0548      | 27.23235     | 7.25556      | 3.2610 |
| 5      | 9.677         | VB   | 0.0658      | 24.81337     | 5.28304      | 2.9713 |

Totals : 835.10185 196.63863

=====  
\*\*\* End of Report \*\*\*

Sample Name: E5

```

=====
Acq. Operator   : Y. Su                               Seq. Line :    6
Acq. Instrument : Instrument 1                         Location  : Vial 6
Injection Date  : 1/4/2023 2:55:35 PM                Inj       :    1
                                                    Inj Volume: 20.0 µl
Different Inj Volume from Sequence !   Actual Inj Volume : 40.0 µl
Acq. Method     : D:\DATA\2023\BURKART\BURKART-HPLC-01042023-A 2023-01-04 13-04-53\HPLC-UV-MS-
                2021-A.M
Last changed    : 1/4/2023 12:59:41 PM by Y. Su
Analysis Method : C:\CHEM32\1\METHODS\HPLC-DATA-ANALYSIS-2022-A.M
Last changed    : 1/5/2023 10:05:03 AM by Y. Su
                (modified after loading)
Additional Info  : Peak(s) manually integrated

```

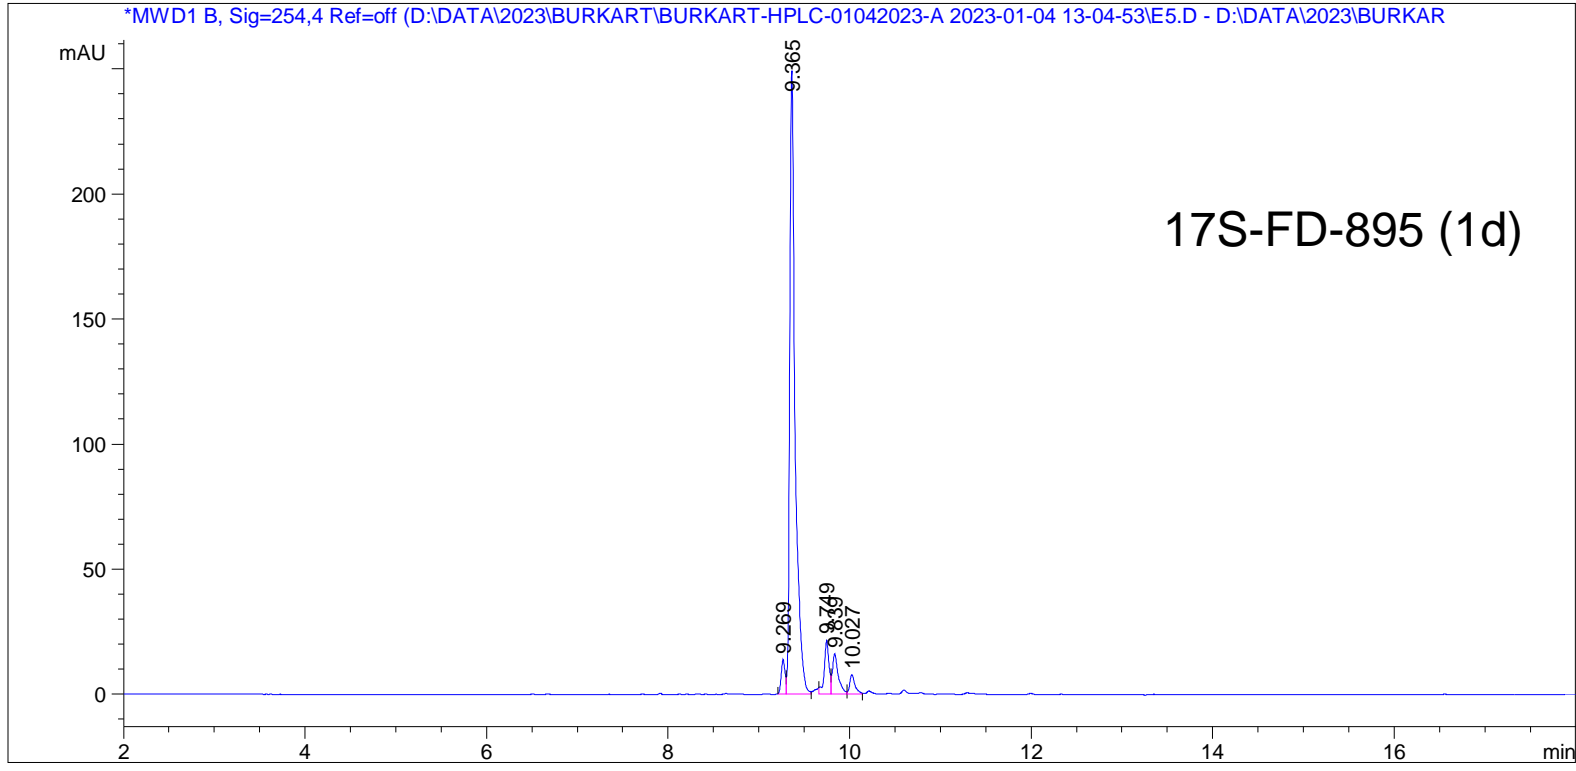

```

=====
                          Area Percent Report
=====

```

```

Sorted By           :      Signal
Multiplier:         :      1.0000
Dilution:           :      1.0000
Use Multiplier & Dilution Factor with ISTDs

```

```

Signal 1: MWD1 B, Sig=254,4 Ref=off
Signal has been modified after loading from rawdata file!

```

Sample Name: E5

| Peak # | RetTime [min] | Type | Width [min] | Area [mAU*s] | Height [mAU] | Area %  |
|--------|---------------|------|-------------|--------------|--------------|---------|
| 1      | 9.269         | BV   | 0.0456      | 41.34902     | 13.96243     | 3.3074  |
| 2      | 9.365         | VB   | 0.0600      | 1025.93884   | 249.21840    | 82.0618 |
| 3      | 9.749         | BV   | 0.0542      | 79.59547     | 21.48303     | 6.3666  |
| 4      | 9.839         | VB   | 0.0637      | 72.47417     | 16.04055     | 5.7970  |
| 5      | 10.027        | BB   | 0.0585      | 30.84453     | 7.73407      | 2.4672  |

Totals :                                   1250.20203   308.43848

=====  
\*\*\* End of Report \*\*\*



Sample Name: C5: 4.0 ug loaded

```

=====
Acq. Operator   : Y. Su                               Seq. Line :    4
Acq. Instrument : Instrument 1                         Location  : Vial 4
Injection Date  : 1/4/2023 2:11:00 PM                Inj       :    1
                                                    Inj Volume: 20.0 µl
Different Inj Volume from Sequence !   Actual Inj Volume : 40.0 µl
Acq. Method     : D:\DATA\2023\BURKART\BURKART-HPLC-01042023-A 2023-01-04 13-04-53\HPLC-UV-MS-
                2021-A.M
Last changed    : 1/4/2023 12:59:41 PM by Y. Su
Analysis Method : C:\CHEM32\1\METHODS\HPLC-DATA-ANALYSIS-2022-A.M
Last changed    : 1/5/2023 10:05:03 AM by Y. Su
                (modified after loading)
    
```

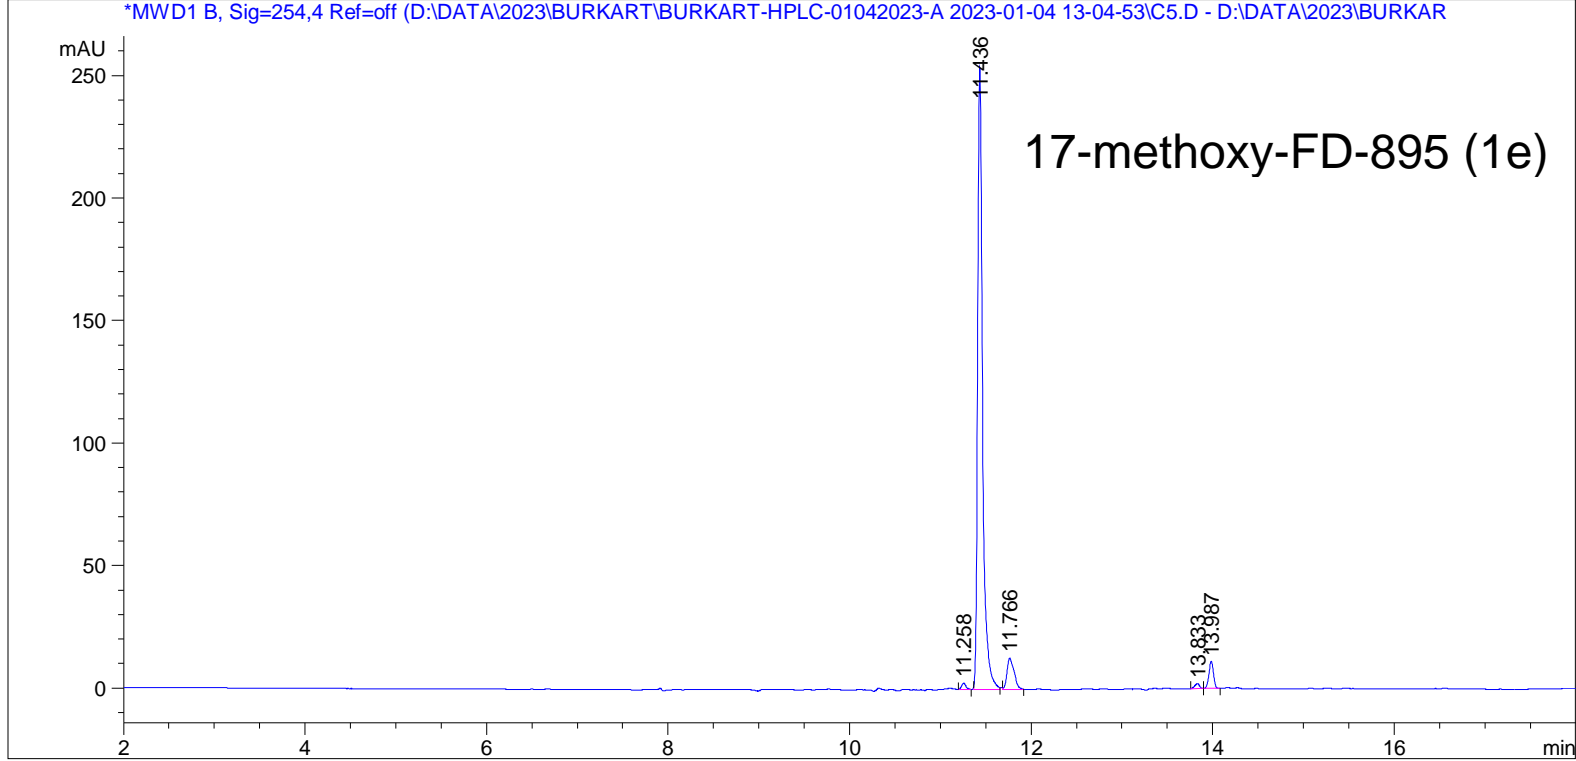

Area Percent Report

```

Sorted By      :      Signal
Multiplier:    :      1.0000
Dilution:      :      1.0000
Use Multiplier & Dilution Factor with ISTDs
    
```

Signal 1: MWD1 B, Sig=254,4 Ref=off  
 Signal has been modified after loading from rawdata file!

| Peak # | RetTime [min] | Type | Width [min] | Area [mAU*s] | Height [mAU] | Area %  |
|--------|---------------|------|-------------|--------------|--------------|---------|
| 1      | 11.258        | BB   | 0.0491      | 8.02855      | 2.52526      | 0.7448  |
| 2      | 11.436        | BB   | 0.0568      | 954.69629    | 254.49214    | 88.5691 |

Sample Name: C5: 4.0 ug loaded

| Peak # | RetTime [min] | Type | Width [min] | Area [mAU*s] | Height [mAU] | Area % |
|--------|---------------|------|-------------|--------------|--------------|--------|
| 3      | 11.766        | BB   | 0.0779      | 69.58083     | 12.89894     | 6.4552 |
| 4      | 13.833        | BV   | 0.0566      | 7.35602      | 2.01246      | 0.6824 |
| 5      | 13.987        | VB   | 0.0542      | 38.24908     | 11.09269     | 3.5484 |

Totals : 1077.91076 283.02150

=====  
\*\*\* End of Report \*\*\*



Sample Name: K5

| Peak # | RetTime [min] | Type | Width [min] | Area [mAU*s] | Height [mAU] | Area %  |
|--------|---------------|------|-------------|--------------|--------------|---------|
| 1      | 11.442        | BB   | 0.0548      | 138.16333    | 37.68406     | 90.4594 |
| 2      | 11.769        | MM   | 0.0844      | 9.07993      | 1.79201      | 5.9449  |
| 3      | 13.965        | BB   | 0.0539      | 5.49186      | 1.60504      | 3.5957  |

Totals :                                   152.73512   41.08111

=====  
\*\*\* End of Report \*\*\*

Sample Name: G5

```

=====
Acq. Operator   : Y. Su                               Seq. Line :    8
Acq. Instrument : Instrument 1                         Location  : Vial 8
Injection Date  : 1/4/2023 3:40:25 PM                 Inj       :    1
                                                    Inj Volume: 20.0 µl
Different Inj Volume from Sequence !   Actual Inj Volume : 40.0 µl
Acq. Method     : D:\DATA\2023\BURKART\BURKART-HPLC-01042023-A 2023-01-04 13-04-53\HPLC-UV-MS-
                2021-A.M
Last changed    : 1/4/2023 12:59:41 PM by Y. Su
Analysis Method : C:\CHEM32\1\METHODS\HPLC-DATA-ANALYSIS-2022-A.M
Last changed    : 1/5/2023 10:05:03 AM by Y. Su
                (modified after loading)
    
```

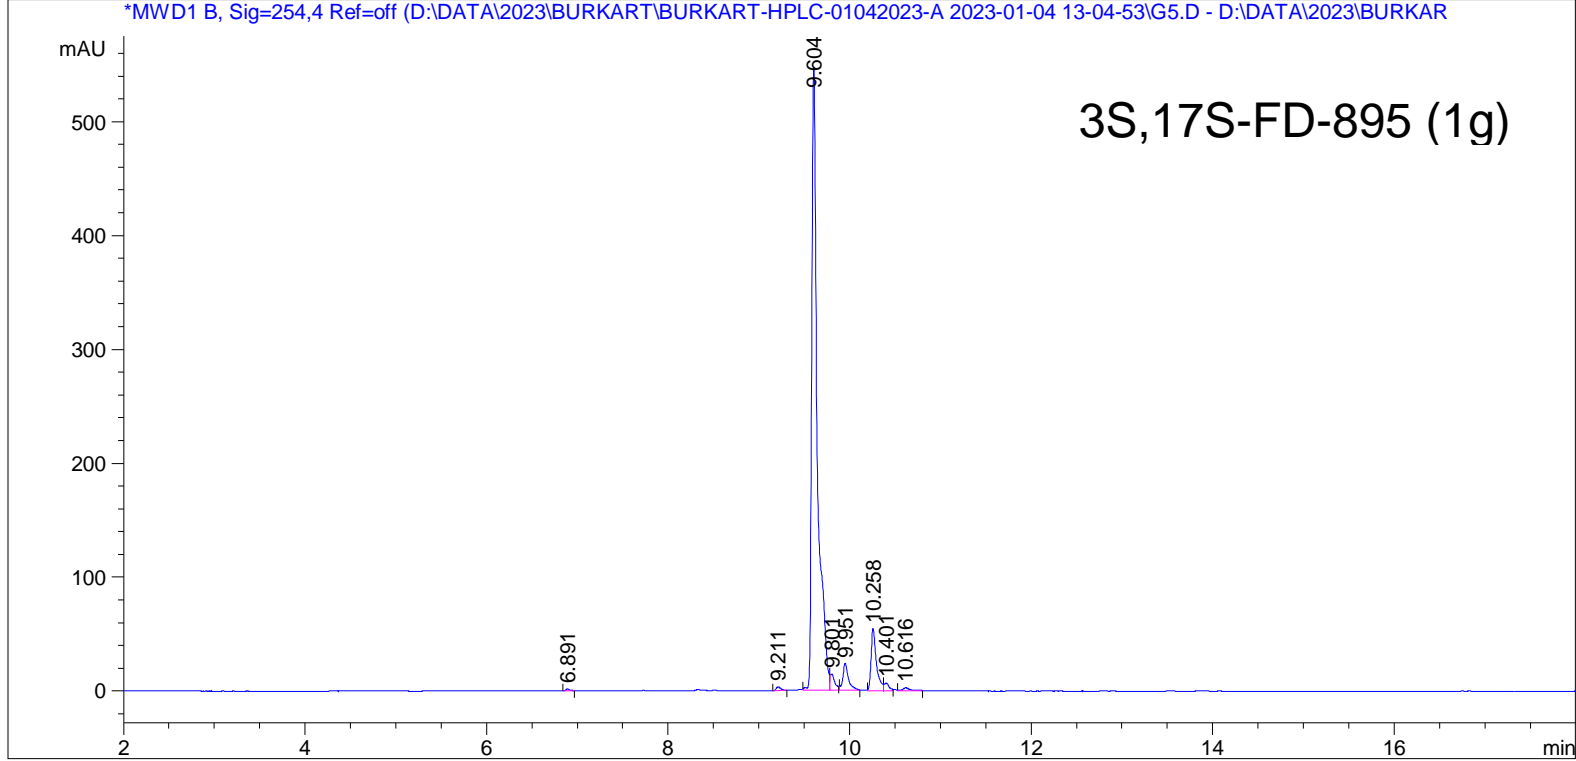

Area Percent Report

```

Sorted By      :      Signal
Multiplier:    :      1.0000
Dilution:      :      1.0000
Use Multiplier & Dilution Factor with ISTDs
    
```

Signal 1: MWD1 B, Sig=254,4 Ref=off  
 Signal has been modified after loading from rawdata file!

| Peak # | RetTime [min] | Type | Width [min] | Area [mAU*s] | Height [mAU] | Area % |
|--------|---------------|------|-------------|--------------|--------------|--------|
| 1      | 6.891         | BB   | 0.0496      | 5.67575      | 1.67366      | 0.2030 |
| 2      | 9.211         | BB   | 0.0547      | 12.46731     | 3.40371      | 0.4460 |

Sample Name: G5

| Peak # | RetTime [min] | Type | Width [min] | Area [mAU*s] | Height [mAU] | Area %  |
|--------|---------------|------|-------------|--------------|--------------|---------|
| 3      | 9.604         | BV   | 0.0622      | 2360.77832   | 548.17621    | 84.4495 |
| 4      | 9.801         | VB   | 0.0510      | 49.38311     | 14.06137     | 1.7665  |
| 5      | 9.951         | BB   | 0.0628      | 103.31221    | 23.73966     | 3.6957  |
| 6      | 10.258        | BV   | 0.0593      | 220.40396    | 54.38601     | 7.8843  |
| 7      | 10.401        | VB   | 0.0600      | 26.77395     | 6.51367      | 0.9578  |
| 8      | 10.616        | BB   | 0.0833      | 16.69579     | 2.77030      | 0.5972  |

Totals :                                   2795.49041   654.72459

=====  
\*\*\* End of Report \*\*\*

Sample Name: F5

```

=====
Acq. Operator   : Y. Su                               Seq. Line :    7
Acq. Instrument : Instrument 1                         Location  : Vial 7
Injection Date  : 1/4/2023 3:18:01 PM                 Inj       :    1
                                                    Inj Volume: 20.0 µl
Different Inj Volume from Sequence !   Actual Inj Volume : 40.0 µl
Acq. Method     : D:\DATA\2023\BURKART\BURKART-HPLC-01042023-A 2023-01-04 13-04-53\HPLC-UV-MS-
                2021-A.M
Last changed    : 1/4/2023 12:59:41 PM by Y. Su
Analysis Method : C:\CHEM32\1\METHODS\HPLC-DATA-ANALYSIS-2022-A.M
Last changed    : 1/5/2023 10:05:03 AM by Y. Su
                (modified after loading)
    
```

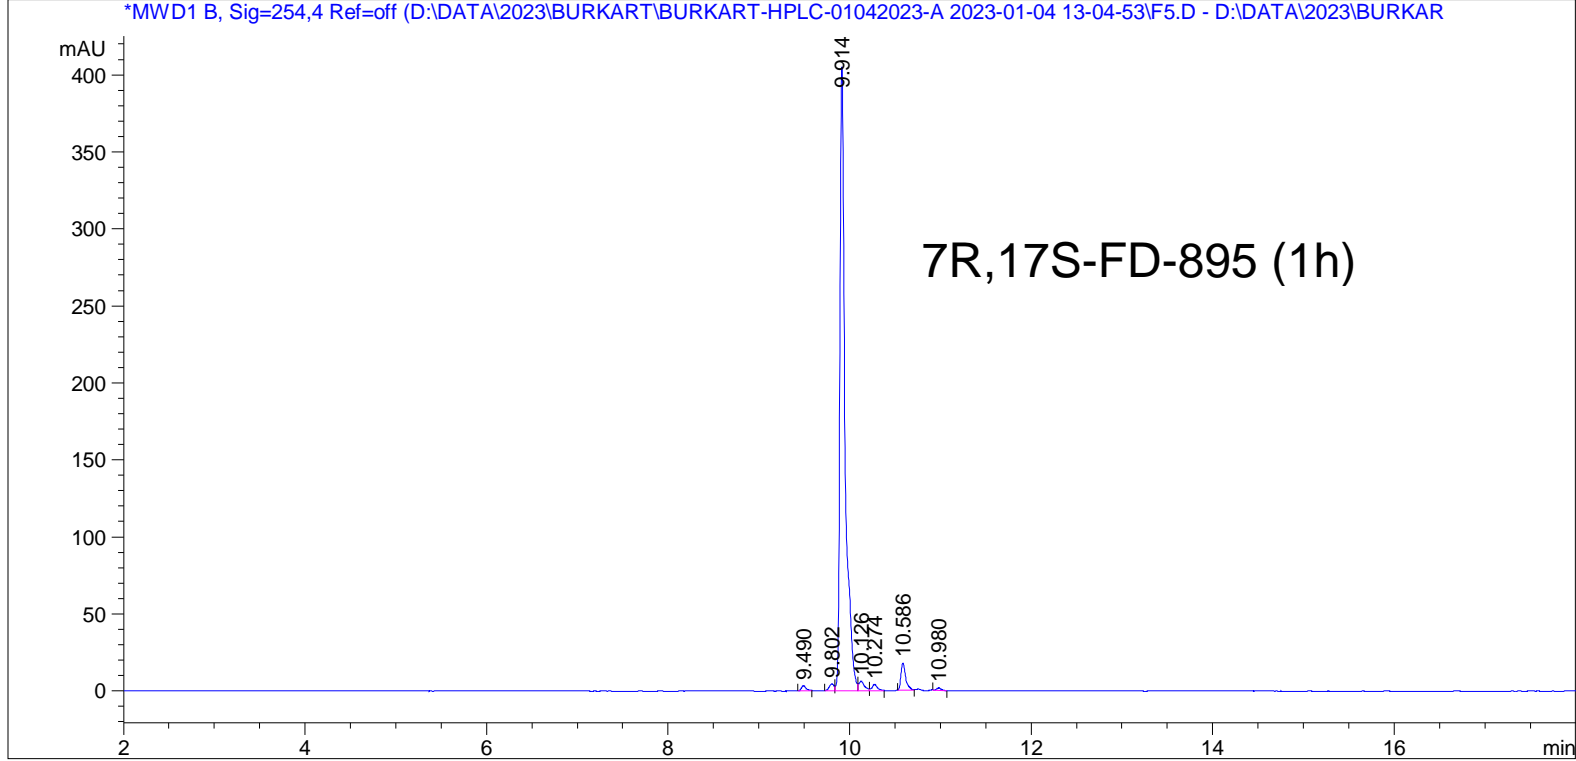

Area Percent Report

```

Sorted By      :      Signal
Multiplier:    :      1.0000
Dilution:      :      1.0000
Use Multiplier & Dilution Factor with ISTDs
    
```

Signal 1: MWD1 B, Sig=254,4 Ref=off  
 Signal has been modified after loading from rawdata file!

| Peak # | RetTime [min] | Type | Width [min] | Area [mAU*s] | Height [mAU] | Area % |
|--------|---------------|------|-------------|--------------|--------------|--------|
| 1      | 9.490         | BB   | 0.0544      | 12.50176     | 3.36434      | 0.7130 |
| 2      | 9.802         | BV   | 0.0562      | 16.24353     | 4.38981      | 0.9264 |

Sample Name: F5

| Peak # | RetTime [min] | Type | Width [min] | Area [mAU*s] | Height [mAU] | Area %  |
|--------|---------------|------|-------------|--------------|--------------|---------|
| 3      | 9.914         | VV   | 0.0573      | 1611.82349   | 406.07657    | 91.9243 |
| 4      | 10.126        | VV   | 0.0614      | 26.76514     | 6.19754      | 1.5264  |
| 5      | 10.274        | VB   | 0.0596      | 16.39960     | 4.01876      | 0.9353  |
| 6      | 10.586        | BB   | 0.0528      | 63.69561     | 17.76866     | 3.6326  |
| 7      | 10.980        | BB   | 0.0548      | 5.99510      | 1.67153      | 0.3419  |

Totals : 1753.42422 443.48721

=====  
\*\*\* End of Report \*\*\*



Sample Name: I5

```

=====
Acq. Operator   : Y. Su                               Seq. Line :   10
Acq. Instrument : Instrument 1                         Location  : Vial 10
Injection Date  : 1/4/2023 4:25:18 PM                 Inj       :    1
                                                    Inj Volume: 20.0 µl
Different Inj Volume from Sequence !   Actual Inj Volume : 40.0 µl
Acq. Method     : D:\DATA\2023\BURKART\BURKART-HPLC-01042023-A 2023-01-04 13-04-53\HPLC-UV-MS-
                2021-A.M
Last changed    : 1/4/2023 12:59:41 PM by Y. Su
Analysis Method : C:\CHEM32\1\METHODS\HPLC-DATA-ANALYSIS-2022-A.M
Last changed    : 1/5/2023 10:05:03 AM by Y. Su
                (modified after loading)
    
```

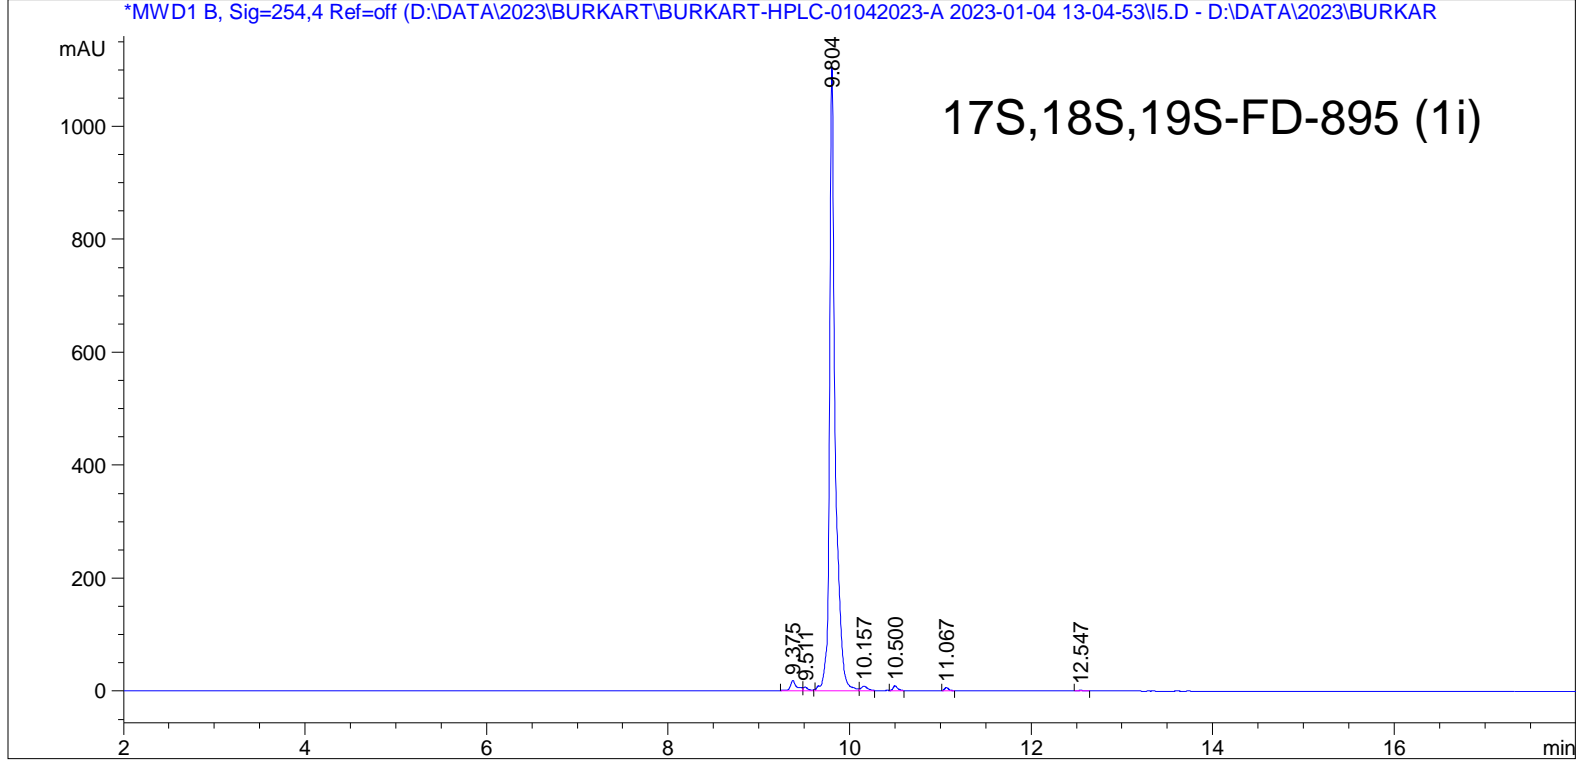

Area Percent Report

```

Sorted By      :      Signal
Multiplier:    :      1.0000
Dilution:      :      1.0000
Use Multiplier & Dilution Factor with ISTDs
    
```

Signal 1: MWD1 B, Sig=254,4 Ref=off  
 Signal has been modified after loading from rawdata file!

| Peak # | RetTime [min] | Type | Width [min] | Area [mAU*s] | Height [mAU] | Area % |
|--------|---------------|------|-------------|--------------|--------------|--------|
| 1      | 9.375         | BV   | 0.0705      | 92.83563     | 18.52970     | 1.8350 |
| 2      | 9.511         | VB   | 0.0574      | 27.56378     | 6.79121      | 0.5448 |



Sample Name: H5

```

=====
Acq. Operator   : Y. Su                               Seq. Line :    9
Acq. Instrument : Instrument 1                         Location  : Vial 9
Injection Date  : 1/4/2023 4:02:51 PM                 Inj       :    1
                                                    Inj Volume: 20.0 µl
Different Inj Volume from Sequence !   Actual Inj Volume : 40.0 µl
Acq. Method     : D:\DATA\2023\BURKART\BURKART-HPLC-01042023-A 2023-01-04 13-04-53\HPLC-UV-MS-
                2021-A.M
Last changed    : 1/4/2023 12:59:41 PM by Y. Su
Analysis Method : C:\CHEM32\1\METHODS\HPLC-DATA-ANALYSIS-2022-A.M
Last changed    : 1/5/2023 10:05:03 AM by Y. Su
                (modified after loading)
    
```

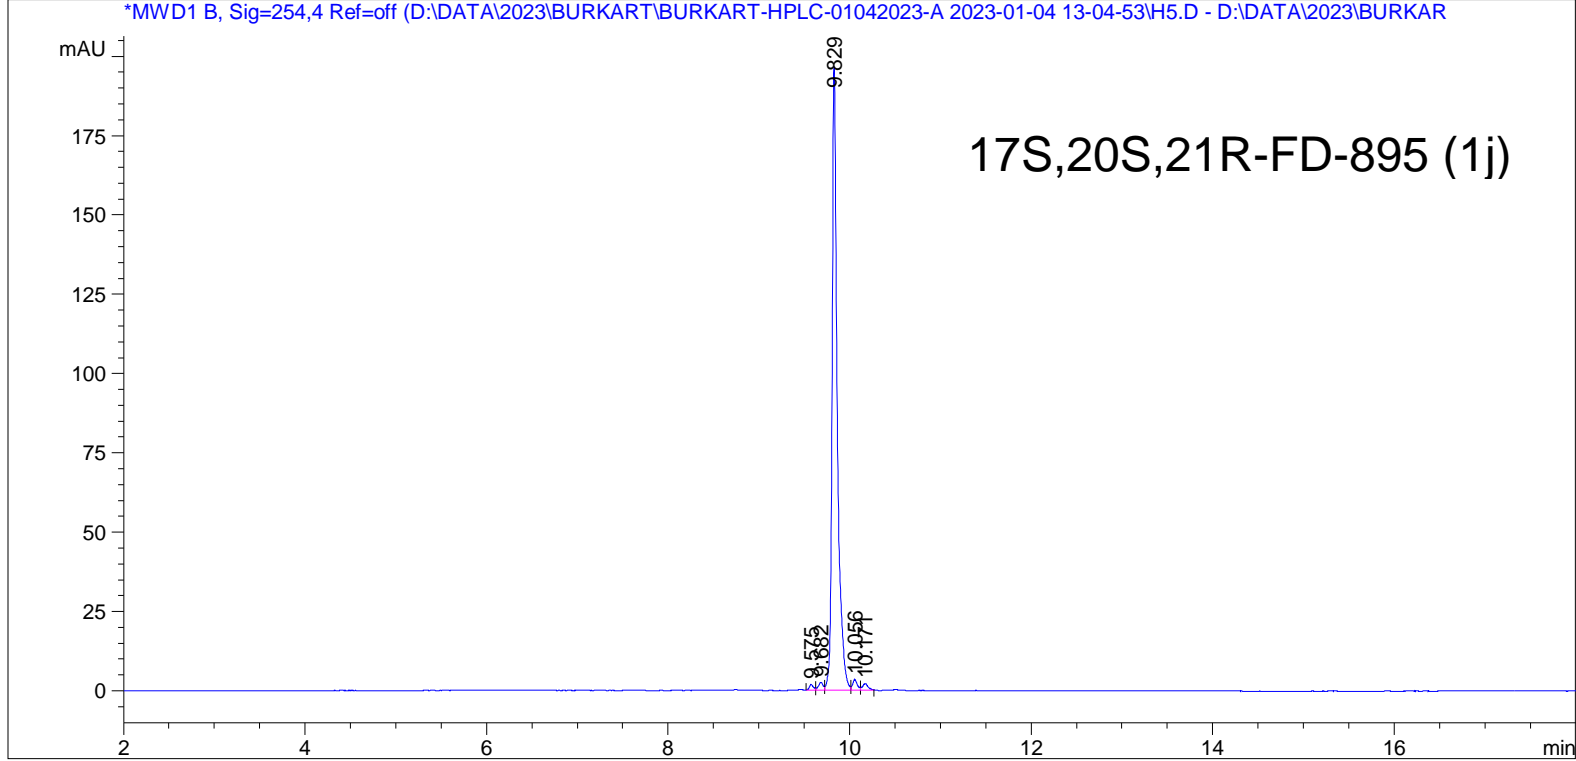

Area Percent Report

```

Sorted By      :      Signal
Multiplier:    :      1.0000
Dilution:      :      1.0000
Use Multiplier & Dilution Factor with ISTDs
    
```

Signal 1: MWD1 B, Sig=254,4 Ref=off  
 Signal has been modified after loading from rawdata file!

| Peak # | RetTime [min] | Type | Width [min] | Area [mAU*s] | Height [mAU] | Area % |
|--------|---------------|------|-------------|--------------|--------------|--------|
| 1      | 9.575         | BV   | 0.0478      | 5.48202      | 1.73994      | 0.6680 |
| 2      | 9.682         | VV   | 0.0526      | 8.73602      | 2.45275      | 1.0645 |

Sample Name: H5

| Peak # | RetTime [min] | Type | Width [min] | Area [mAU*s] | Height [mAU] | Area %  |
|--------|---------------|------|-------------|--------------|--------------|---------|
| 3      | 9.829         | VV   | 0.0586      | 784.32239    | 196.46071    | 95.5690 |
| 4      | 10.056        | VV   | 0.0557      | 12.70005     | 3.38903      | 1.5475  |
| 5      | 10.171        | VB   | 0.0646      | 9.44691      | 2.13526      | 1.1511  |

Totals :                                   820.68738   206.17768

=====  
\*\*\* End of Report \*\*\*
